# Supplementary material for: Integrating the Ribonucleic Acid Sequencing Data From Various Studies for Exploring the Multiple Sclerosis-Related Long Noncoding Ribonucleic Acids and Their Functions
Source: Front Genet. 2019 Nov 12;10:1136. doi: 10.3389/fgene.2019.01136 (PMC6861379; doi:10.3389/fgene.2019.01136)
Supplement: Supplementary file 2 [file Table_2.xlsx]

## Sheet: Sheet1
Table S2 The significantly differentially expressed lncRNAs between MS and control in blood tissues
LncRNAs	Meta-analysis			Heterogeneity test		Model
	SMD	95% CI	P value	I2	Qp
NONHSAG069672.1	0.664546	[0.44780850; 0.88128345]	1.85957e-09	0.0666113	0.380018	FEM
NONHSAG108980.1	0.631344	[0.41379296; 0.84889525]	1.28524e-08	0.49284	0.0268928	FEM
NONHSAG023890.2	0.590008	[0.37394712; 0.80606829]	8.68565e-08	0.224131	0.223319	FEM
NONHSAG020668.2	0.583285	[0.36814053; 0.79842999]	1.07354e-07	0	0.997354	FEM
NONHSAG070624.1	0.569648	[0.35385403; 0.78544197]	2.2918e-07	0	0.484633	FEM
NONHSAG112532.1	0.567781	[0.35107323; 0.78448837]	2.8175e-07	0.222283	0.225129	FEM
NONHSAG083898.1	0.527156	[0.31248237; 0.74182876]	1.48671e-06	0	0.945844	FEM
NONHSAG012829.2	0.523878	[0.30757099; 0.74018548]	2.06499e-06	0.414086	0.0652714	FEM
NONHSAG053512.3	0.518288	[0.30275899; 0.73381782]	2.4379e-06	0.169829	0.277283	FEM
NONHSAG005672.3	0.505391	[0.28983159; 0.72095050]	4.32068e-06	0.178547	0.268546	FEM
NONHSAG020600.2	-0.495737	[-0.71184996; -0.27962305]	6.92475e-06	0.51177	0.0205716	FEM
NONHSAG001662.2	0.483099	[0.26887096; 0.69732780]	9.87325e-06	0	0.982903	FEM
NONHSAG057890.1	0.482581	[0.26773113; 0.69743041]	1.0705e-05	0	0.790004	FEM
NONHSAG079487.1	0.483356	[0.26806470; 0.69864786]	1.0803e-05	0.273137	0.176465	FEM
NONHSAG078346.1	0.473177	[0.25836264; 0.68799134]	1.5792e-05	0	0.779831	FEM
NONHSAG047806.3	0.470169	[0.25471729; 0.68562132]	1.89257e-05	0.0736971	0.3731	FEM
NONHSAG105507.1	0.472375	[0.25589934; 0.68885137]	1.89477e-05	0.421919	0.0605842	FEM
NONHSAG041184.2	0.472455	[0.25561992; 0.68929056]	1.94967e-05	0.480599	0.0315707	FEM
NONHSAG111269.1	0.464483	[0.24983717; 0.67912945]	2.22189e-05	0	0.90064	FEM
NONHSAG114878.1	0.461345	[0.24586927; 0.67682088]	2.71115e-05	0.240319	0.207573	FEM
NONHSAG005998.2	0.460514	[0.24534032; 0.67568690]	2.73125e-05	0.279921	0.170203	FEM
NONHSAG078267.1	-0.461963	[-0.67868641; -0.24523901]	2.94231e-05	0.532052	0.0149802	FEM
NONHSAG114626.1	0.458434	[0.24325241; 0.67361636]	2.97095e-05	0.100362	0.346814	FEM
NONHSAG030067.3	0.456456	[0.24162411; 0.67128691]	3.12116e-05	0	0.621717	FEM
NONHSAG024779.2	0.453672	[0.23952911; 0.66781551]	3.29077e-05	0	0.859036	FEM
NONHSAG018340.2	0.458317	[0.24150302; 0.67513080]	3.42508e-05	0.492593	0.0269827	FEM
NONHSAG093337.1	0.452822	[0.23758561; 0.66805857]	3.73131e-05	0.364372	0.099152	FEM
NONHSAG034417.2	0.449097	[0.23479014; 0.66340466]	4.00257e-05	0	0.7992	FEM
NONHSAG060145.1	0.448202	[0.23322078; 0.66318307]	4.38322e-05	0.312113	0.141466	FEM
NONHSAG094063.1	0.449347	[0.23374058; 0.66495330]	4.4105e-05	0.400599	0.0737715	FEM
NONHSAG062097.1	0.446916	[0.23195296; 0.66187998]	4.60328e-05	0.294739	0.156761	FEM
NONHSAG029775.2	0.446692	[0.23160779; 0.66177720]	4.68983e-05	0.309679	0.143575	FEM
NONHSAG104337.1	0.444448	[0.23039637; 0.65850057]	4.7082e-05	0	0.881082	FEM
NONHSAG095648.1	0.442937	[0.22903183; 0.65684293]	4.93676e-05	0	0.855208	FEM
NONHSAG038401.2	0.441292	[0.22715292; 0.65543066]	5.36529e-05	0	0.808444	FEM
NONHSAG088998.1	0.439093	[0.22487258; 0.65331274]	5.88276e-05	0	0.75711	FEM
NONHSAG106516.1	0.441865	[0.22580864; 0.65792082]	6.11128e-05	0.543698	0.0122903	FEM
NONHSAG065622.1	0.436393	[0.22216265; 0.65062403]	6.53611e-05	0	0.735673	FEM
NONHSAG101781.2	0.439051	[0.22281969; 0.65528265]	6.89971e-05	0.553452	0.0103117	FEM
NONHSAG106825.1	0.437025	[0.22173842; 0.65231147]	6.92817e-05	0.142175	0.305043	FEM
NONHSAG051020.2	0.432848	[0.21838358; 0.64731262]	7.62737e-05	0	0.760621	FEM
NONHSAG031582.3	0.43306	[0.21825258; 0.64786645]	7.76824e-05	0.242125	0.205831	FEM
NONHSAG052228.2	0.43205	[0.21738599; 0.64671488]	7.98502e-05	0	0.702909	FEM
NONHSAG043256.2	0.432546	[0.21735157; 0.64774041]	8.16015e-05	0.230375	0.217219	FEM
NONHSAG001731.2	-0.434987	[-0.65140219; -0.21857270]	8.16367e-05	0.462583	0.0393174	FEM
NONHSAG115153.1	0.432145	[0.21675982; 0.64753012]	8.40636e-05	0.318595	0.1359	FEM
NONHSAG034704.2	-0.430257	[-0.64562427; -0.21488960]	9.01601e-05	0.349921	0.110233	FEM
NONHSAG003178.2	0.429772	[0.21422857; 0.64531475]	9.30453e-05	0.210576	0.236655	FEM
NONHSAG003421.2	0.428944	[0.21349291; 0.64439599]	9.53294e-05	0.182384	0.264705	FEM
NONHSAG083459.1	0.423399	[0.20943485; 0.63736265]	0.000105097	0	0.884359	FEM
NONHSAG106051.1	0.423436	[0.20916233; 0.63771066]	0.000107397	0	0.524423	FEM
NONHSAG105349.1	0.425212	[0.20981452; 0.64060887]	0.000109193	0.447009	0.0468466	FEM
NONHSAG006438.3	0.423254	[0.20873403; 0.63777412]	0.000110121	0	0.765344	FEM
NONHSAG037072.2	-0.947359	[-1.42824374; -0.46647460]	0.0001128	0.639003	0.00133578	REM
NONHSAG032384.3	0.42346	[0.20810170; 0.63881923]	0.000116226	0.219503	0.227858	FEM
NONHSAG058600.1	0.422337	[0.20726560; 0.63740829]	0.000118667	0.318782	0.135741	FEM
NONHSAG081787.1	0.41954	[0.20535733; 0.63372170]	0.000123414	0	0.712663	FEM
NONHSAG054813.3	0.418448	[0.20422871; 0.63266658]	0.000128877	0	0.708334	FEM
NONHSAG114853.1	0.419825	[0.20485149; 0.63479811]	0.000129338	0.295728	0.155877	FEM
NONHSAG107049.1	0.418973	[0.20436043; 0.63358623]	0.000130048	0.139583	0.307643	FEM
NONHSAG032337.2	0.419875	[0.20435004; 0.63540083]	0.000134336	0.414356	0.0651066	FEM
NONHSAG006854.2	0.416823	[0.20238019; 0.63126646]	0.00013911	0	0.740546	FEM
NONHSAG112267.1	0.416387	[0.20205602; 0.63071776]	0.000140237	0	0.617052	FEM
NONHSAG078030.1	0.417371	[0.20236123; 0.63238005]	0.000141976	0.190572	0.256526	FEM
NONHSAG028725.2	0.414636	[0.20059130; 0.62868122]	0.000146573	0	0.914333	FEM
NONHSAG017832.2	0.414494	[0.20022505; 0.62876367]	0.000149721	0	0.722328	FEM
NONHSAG069109.1	0.41327	[0.19956327; 0.62697612]	0.000150474	0	0.990741	FEM
NONHSAG033366.2	0.41385	[0.19967657; 0.62802364]	0.000152274	0	0.577832	FEM
NONHSAG087635.1	0.417086	[0.20103231; 0.63313945]	0.000154496	0.54285	0.0124738	FEM
NONHSAG062621.1	0.414817	[0.19985907; 0.62977524]	0.000155369	0.296448	0.155234	FEM
NONHSAG102751.1	0.412603	[0.19871990; 0.62648697]	0.000156173	0	0.900314	FEM
NONHSAG039262.2	0.414364	[0.19929202; 0.62943582]	0.000159243	0.177019	0.270075	FEM
NONHSAG000020.2	0.41383	[0.19887112; 0.62878948]	0.000161097	0.0414118	0.404352	FEM
NONHSAG054609.2	-0.41315	[-0.62832430; -0.19797519]	0.000167664	0.383704	0.0851615	FEM
NONHSAG006482.3	0.411206	[0.19580697; 0.62660407]	0.000182759	0.313528	0.140243	FEM
NONHSAG089337.1	0.40832	[0.19440948; 0.62223069]	0.000183059	0	0.71823	FEM
NONHSAG051354.2	0.407732	[0.19378122; 0.62168199]	0.000187543	0	0.863101	FEM
NONHSAG080177.1	0.407465	[0.19342320; 0.62150661]	0.000190574	0	0.773568	FEM
NONHSAG029325.3	0.408303	[0.19363656; 0.62296950]	0.000193015	0.0487742	0.397289	FEM
NONHSAG072049.1	0.410274	[0.19454682; 0.62600065]	0.000193337	0.4942	0.0264022	FEM
NONHSAG115262.1	0.407309	[0.19273763; 0.62188136]	0.000198785	0	0.462628	FEM
NONHSAG018298.2	0.40798	[0.19300946; 0.62294959]	0.000199402	0.0624728	0.384044	FEM
NONHSAG025269.2	-0.409262	[-0.62514810; -0.19337655]	0.000202689	0.529485	0.0156229	FEM
NONHSAG103293.1	0.406471	[0.19201700; 0.62092528]	0.000203255	0	0.456434	FEM
NONHSAG012505.3	0.406715	[0.19209489; 0.62133463]	0.000203773	0.0650424	0.381546	FEM
NONHSAG070807.1	0.409808	[0.19333676; 0.62628015]	0.000206826	0.546684	0.0116587	FEM
NONHSAG080131.1	0.40647	[0.19158982; 0.62134927]	0.000209263	0.284437	0.16607	FEM
NONHSAG043942.2	0.407529	[0.19148092; 0.62357738]	0.000218056	0.472582	0.0348905	FEM
NONHSAG035022.2	-0.407003	[-0.62294251; -0.19106400]	0.000220566	0.382939	0.0856962	FEM
NONHSAG078409.1	0.40148	[0.18776741; 0.61519248]	0.000231364	0	0.948191	FEM
NONHSAG078385.1	-0.403994	[-0.61942764; -0.18856065]	0.000237372	0.296951	0.154785	FEM
NONHSAG057480.1	0.402055	[0.18741632; 0.61669293]	0.000241208	0.151874	0.295306	FEM
NONHSAG058655.1	0.40284	[0.18758194; 0.61809721]	0.000244453	0.293138	0.158197	FEM
NONHSAG108030.1	0.401153	[0.18677541; 0.61553048]	0.000244799	0	0.449178	FEM
NONHSAG027588.3	0.399744	[0.18495063; 0.61453696]	0.000264614	0.213069	0.234194	FEM
NONHSAG058022.1	0.398659	[0.18413627; 0.61318269]	0.000270141	0.0283443	0.416785	FEM
NONHSAG054855.2	0.39736	[0.18346340; 0.61125675]	0.000271443	0	0.827685	FEM
NONHSAG100997.1	0.398416	[0.18382172; 0.61301063]	0.000273766	0.0387392	0.406906	FEM
NONHSAG054914.2	0.397118	[0.18295970; 0.61127706]	0.000278559	0	0.712127	FEM
NONHSAG007490.2	0.396329	[0.18243462; 0.61022384]	0.000281539	0	0.904255	FEM
NONHSAG105581.1	0.397837	[0.18263642; 0.61303843]	0.000290745	0.319663	0.134992	FEM
NONHSAG067652.1	0.396857	[0.18203178; 0.61168234]	0.000293691	0.264365	0.184655	FEM
NONHSAG022581.2	-0.39576	[-0.61024528; -0.18127406]	0.000298604	0	0.454677	FEM
NONHSAG086135.1	0.393498	[0.18009405; 0.60690099]	0.000301427	0	0.948973	FEM
NONHSAG037359.3	0.393817	[0.17992614; 0.60770780]	0.000307661	0	0.845546	FEM
NONHSAG082400.1	0.395184	[0.18044923; 0.60991970]	0.000309693	0	0.487189	FEM
NONHSAG061814.1	0.395841	[0.18064637; 0.61103508]	0.00031175	0.218606	0.22874	FEM
NONHSAG097228.1	0.393572	[0.17884485; 0.60829938]	0.000327558	0.321966	0.133038	FEM
NONHSAG061775.2	0.394098	[0.17864842; 0.60954665]	0.000336802	0.389344	0.0812695	FEM
NONHSAG059235.1	0.393039	[0.17796652; 0.60811237]	0.00034118	0.475761	0.0335496	FEM
NONHSAG001064.2	-0.393645	[-0.60906759; -0.17822253]	0.000341575	0.396395	0.0765303	FEM
NONHSAG011933.2	0.39138	[0.17717220; 0.60558712]	0.000342115	0	0.474422	FEM
NONHSAG041899.2	0.391398	[0.17712782; 0.60566795]	0.000343269	0.0668667	0.379769	FEM
NONHSAG089377.1	0.392398	[0.17756180; 0.60723458]	0.000343679	0.344034	0.114891	FEM
NONHSAG013903.2	0.390877	[0.17686379; 0.60489048]	0.000343893	0	0.707885	FEM
NONHSAG063179.1	0.391197	[0.17699711; 0.60539729]	0.000344146	0	0.555824	FEM
NONHSAG096090.1	0.39142	[0.17690803; 0.60593190]	0.000348342	0.0738948	0.372906	FEM
NONHSAG040467.2	-0.392784	[-0.60813154; -0.17743665]	0.000350292	0.341888	0.116609	FEM
NONHSAG059606.1	0.392001	[0.17706560; 0.60693579]	0.000350674	0.255209	0.193306	FEM
NONHSAG096303.1	0.390833	[0.17620286; 0.60546346]	0.000358235	0.230856	0.216751	FEM
NONHSAG016639.2	-0.390802	[-0.60566896; -0.17593545]	0.000364035	0.294849	0.156662	FEM
NONHSAG054716.2	0.391251	[0.17607952; 0.60642273]	0.000365371	0.43298	0.0542862	FEM
NONHSAG030120.2	0.390845	[0.17556913; 0.60611996]	0.000372994	0.356998	0.104743	FEM
NONHSAG111703.1	0.389629	[0.17498328; 0.60427488]	0.000373933	0.198446	0.248682	FEM
NONHSAG085850.1	0.388616	[0.17426077; 0.60297081]	0.0003803	0.173547	0.273554	FEM
NONHSAG044072.3	0.390808	[0.17523303; 0.60638338]	0.000380559	0.541025	0.0128754	FEM
NONHSAG085120.1	0.38721	[0.17302480; 0.60139565]	0.000395091	0	0.526194	FEM
NONHSAG044709.2	0.386459	[0.17251065; 0.60040717]	0.000399542	0	0.755874	FEM
NONHSAG005670.3	0.387367	[0.17289314; 0.60184050]	0.000400112	0.201431	0.245715	FEM
NONHSAG011720.2	0.386702	[0.17248767; 0.60091588]	0.000402842	0	0.654965	FEM
NONHSAG102508.1	0.386031	[0.17167063; 0.60039158]	0.000416084	0	0.596566	FEM
NONHSAG063224.1	0.385729	[0.17126199; 0.60019586]	0.000423239	0.153196	0.293979	FEM
NONHSAG098658.1	0.386622	[0.17163562; 0.60160787]	0.000423836	0.404252	0.0714162	FEM
NONHSAG016949.2	0.38535	[0.17093209; 0.59976709]	0.0004275	0.0722866	0.374479	FEM
NONHSAG070876.1	0.383654	[0.17016179; 0.59714619]	0.000427984	0	0.986749	FEM
NONHSAG071593.1	0.383208	[0.16991976; 0.59649535]	0.000429159	0	0.990623	FEM
NONHSAG079021.1	0.384089	[0.17028141; 0.59789616]	0.000429936	0	0.914778	FEM
NONHSAG100863.1	0.385464	[0.17086432; 0.60006378]	0.000430649	0.236332	0.211431	FEM
NONHSAG107369.1	0.384664	[0.17034590; 0.59898144]	0.000435035	0	0.642936	FEM
NONHSAG104408.1	0.383963	[0.16987145; 0.59805407]	0.000439475	0	0.454991	FEM
NONHSAG090716.1	0.384193	[0.16985802; 0.59852843]	0.000442617	0	0.555894	FEM
NONHSAG026902.2	0.382545	[0.16906413; 0.59602561]	0.000444407	0	0.977423	FEM
NONHSAG070034.1	0.382883	[0.16852616; 0.59724077]	0.000463624	0.259434	0.189302	FEM
NONHSAG105938.1	0.383805	[0.16889652; 0.59871349]	0.000464624	0.330641	0.125781	FEM
NONHSAG115003.1	0.381855	[0.16798724; 0.59572302]	0.000466088	0	0.809455	FEM
NONHSAG109462.1	0.383121	[0.16836076; 0.59788196]	0.000471343	0.217099	0.230222	FEM
NONHSAG095677.1	0.380961	[0.16713100; 0.59479163]	0.000479513	0	0.732434	FEM
NONHSAG014032.2	0.383683	[0.16832061; 0.59904508]	0.00047964	0.430047	0.0559189	FEM
NONHSAG045066.2	0.382711	[0.16767139; 0.59775116]	0.000486183	0.396896	0.0761988	FEM
NONHSAG077626.1	0.382013	[0.16730208; 0.59672398]	0.000488059	0.0991533	0.348013	FEM
NONHSAG067133.1	0.379872	[0.16624982; 0.59349507]	0.00049149	0	0.792869	FEM
NONHSAG056454.1	-0.382722	[-0.59818877; -0.16725516]	0.000498723	0.503594	0.0231681	FEM
NONHSAG090476.1	0.381517	[0.16669266; 0.59634128]	0.000499807	0.237549	0.210251	FEM
NONHSAG084504.1	0.380387	[0.16618573; 0.59458818]	0.000500208	0.0149812	0.429356	FEM
NONHSAG104452.1	0.380615	[0.16612897; 0.59510125]	0.00050497	0.0711644	0.375576	FEM
NONHSAG016292.2	0.380779	[0.16614062; 0.59541783]	0.000506804	0.152218	0.29496	FEM
NONHSAG037271.2	0.379924	[0.16557077; 0.59427698]	0.000512867	0	0.445509	FEM
NONHSAG036679.2	0.378374	[0.16468889; 0.59205952]	0.000519322	0	0.943164	FEM
NONHSAG108228.1	0.379535	[0.16506248; 0.59400703]	0.000523454	0.261436	0.187413	FEM
NONHSAG084018.1	0.378924	[0.16458832; 0.59325947]	0.000530065	0.0782726	0.368616	FEM
NONHSAG009308.2	0.378971	[0.16403902; 0.59390282]	0.00054846	0.334502	0.122601	FEM
NONHSAG060319.1	0.376372	[0.16259752; 0.59014689]	0.000558968	0	0.669847	FEM
NONHSAG103431.1	0.377932	[0.16308621; 0.59277823]	0.000565162	0.18538	0.26171	FEM
NONHSAG053665.2	0.377138	[0.16273381; 0.59154146]	0.000565482	0	0.498744	FEM
NONHSAG015167.2	0.377906	[0.16303430; 0.59277815]	0.00056653	0.305616	0.147123	FEM
NONHSAG086349.1	0.377022	[0.16251827; 0.59152625]	0.000571085	0.199023	0.248109	FEM
NONHSAG085164.1	0.37658	[0.16232293; 0.59083649]	0.000571241	0	0.53858	FEM
NONHSAG026564.2	0.375967	[0.16196339; 0.58997148]	0.000574502	0	0.623507	FEM
NONHSAG043725.2	0.378724	[0.16289048; 0.59455754]	0.000583392	0.427663	0.0572664	FEM
NONHSAG104235.1	0.375488	[0.16123915; 0.58973641]	0.000592431	0	0.652755	FEM
NONHSAG080009.1	0.374991	[0.16099971; 0.58898235]	0.000593349	0	0.740145	FEM
NONHSAG080733.1	0.375038	[0.16098975; 0.58908703]	0.000594414	0	0.596705	FEM
NONHSAG029228.2	0.374631	[0.16054167; 0.58872029]	0.000604097	0	0.524276	FEM
NONHSAG060359.1	0.377606	[0.16171625; 0.59349481]	0.000607647	0.531664	0.0150762	FEM
NONHSAG102706.1	0.373592	[0.15997096; 0.58721358]	0.000608601	0	0.923027	FEM
NONHSAG109691.1	0.374068	[0.16014747; 0.58798889]	0.000609582	0	0.516489	FEM
NONHSAG105969.1	0.376435	[0.16112315; 0.59174649]	0.000610925	0.41875	0.0624582	FEM
NONHSAG080774.1	0.373668	[0.15990529; 0.58742975]	0.00061213	0	0.795156	FEM
NONHSAG033585.2	-0.375095	[-0.58982050; -0.16036959]	0.000617422	0.267122	0.18207	FEM
NONHSAG059449.1	0.375039	[0.16010488; 0.58997254]	0.000626188	0.15242	0.294757	FEM
NONHSAG090990.2	0.372397	[0.15875553; 0.58603869]	0.000634405	0	0.741815	FEM
NONHSAG030847.2	0.373444	[0.15909379; 0.58779333]	0.000638422	0.180345	0.266745	FEM
NONHSAG030589.3	0.372581	[0.15869948; 0.58646236]	0.000639426	0.00781425	0.436034	FEM
NONHSAG111787.1	0.374446	[0.15912072; 0.58977138]	0.000653457	0.319977	0.134724	FEM
NONHSAG110490.1	0.371507	[0.15784857; 0.58516466]	0.000654338	0	0.855706	FEM
NONHSAG046314.2	-0.374589	[-0.59002642; -0.15915207]	0.000654576	0.282292	0.168029	FEM
NONHSAG111132.1	0.372725	[0.15798364; 0.58746733]	0.000669058	0.235936	0.211814	FEM
NONHSAG039119.2	0.373229	[0.15813782; 0.58832052]	0.000671358	0.277465	0.172462	FEM
NONHSAG068664.1	0.37053	[0.15660725; 0.58445211]	0.00068662	0	0.636276	FEM
NONHSAG001815.3	0.372749	[0.15746057; 0.58803770]	0.000689979	0.446964	0.0468694	FEM
NONHSAG104995.1	0.369645	[0.15612195; 0.58316767]	0.000691071	0	0.944853	FEM
NONHSAG068928.2	0.3703	[0.15632265; 0.58427764]	0.000694121	0	0.78478	FEM
NONHSAG109166.1	0.370575	[0.15642804; 0.58472226]	0.000694551	0.00380416	0.439751	FEM
NONHSAG013606.2	0.370494	[0.15589502; 0.58509375]	0.000714808	0.153992	0.293179	FEM
NONHSAG051503.2	0.368907	[0.15513057; 0.58268342]	0.000718795	0	0.843934	FEM
NONHSAG068865.1	0.369746	[0.15546452; 0.58402744]	0.000719574	0	0.634718	FEM
NONHSAG114410.1	0.369804	[0.15541518; 0.58419320]	0.000722631	0.296233	0.155426	FEM
NONHSAG102374.1	-0.37207	[-0.58781121; -0.15632810]	0.000724247	0.530801	0.0152911	FEM
NONHSAG083959.1	0.368335	[0.15471089; 0.58195930]	0.000726255	0	0.930102	FEM
NONHSAG097165.1	0.369165	[0.15504708; 0.58328348]	0.000726777	0	0.555793	FEM
NONHSAG101264.1	0.368514	[0.15442352; 0.58260546]	0.00074153	0	0.627377	FEM
NONHSAG036438.2	0.370734	[0.15514950; 0.58631803]	0.000750175	0.428444	0.056823	FEM
NONHSAG011782.2	0.366369	[0.15306099; 0.57967604]	0.000761512	0	0.992722	FEM
NONHSAG090311.1	0.370906	[0.15494651; 0.58686588]	0.000761952	0.552384	0.0105166	FEM
NONHSAG080136.1	0.36826	[0.15372750; 0.58279235]	0.000766888	0.155325	0.291841	FEM
NONHSAG040590.2	0.366381	[0.15254944; 0.58021264]	0.000784285	0	0.734022	FEM
NONHSAG042858.2	0.370357	[0.15415590; 0.58655791]	0.000786446	0.511761	0.0205745	FEM
NONHSAG114713.1	0.367566	[0.15295379; 0.58217905]	0.000788255	0.0788015	0.368097	FEM
NONHSAG073325.1	0.369488	[0.15372887; 0.58524675]	0.000789341	0.541604	0.0127471	FEM
NONHSAG076640.1	0.369006	[0.15349005; 0.58452252]	0.000791053	0.444287	0.0482416	FEM
NONHSAG048530.2	0.370096	[0.15393816; 0.58625439]	0.000791288	0.526262	0.016456	FEM
NONHSAG078395.1	0.366981	[0.15253453; 0.58142816]	0.000796137	0.0624992	0.384019	FEM
NONHSAG051259.2	0.368559	[0.15314659; 0.58397181]	0.0007981	0.32467	0.13076	FEM
NONHSAG106017.1	0.365798	[0.15196319; 0.57963250]	0.000799729	0	0.586262	FEM
NONHSAG009408.2	-0.368491	[-0.58403058; -0.15295065]	0.000805646	0.530885	0.0152701	FEM
NONHSAG109420.1	0.36651	[0.15197083; 0.58104821]	0.000812833	0.172597	0.274507	FEM
NONHSAG030744.2	0.366536	[0.15191358; 0.58115814]	0.000815958	0.0702322	0.376486	FEM
NONHSAG114003.1	0.366303	[0.15150244; 0.58110321]	0.000830507	0.456479	0.0421765	FEM
NONHSAG065065.1	0.365473	[0.15112685; 0.57981988]	0.000832026	0	0.480924	FEM
NONHSAG084366.1	0.364408	[0.15048241; 0.57833452]	0.000841634	0	0.683133	FEM
NONHSAG002835.2	0.367459	[0.15172248; 0.58319483]	0.000842549	0.456609	0.042114	FEM
NONHSAG071389.1	0.364362	[0.15043889; 0.57828509]	0.000842785	0	0.671841	FEM
NONHSAG073268.1	0.367577	[0.15174253; 0.58341241]	0.000843911	0.535448	0.0141579	FEM
NONHSAG108248.1	0.365627	[0.15076357; 0.58049016]	0.000852144	0.367251	0.0970064	FEM
NONHSAG085327.2	0.366218	[0.15099685; 0.58143863]	0.000852636	0.353482	0.107456	FEM
NONHSAG016828.2	0.364116	[0.15012723; 0.57810437]	0.000852778	0	0.674174	FEM
NONHSAG113646.1	0.364848	[0.15034541; 0.57935020]	0.000856774	0.133458	0.313785	FEM
NONHSAG082234.1	0.363314	[0.14964885; 0.57698011]	0.000859889	0	0.891962	FEM
NONHSAG090273.1	0.363644	[0.14972608; 0.57756186]	0.000862709	0.0474803	0.398533	FEM
NONHSAG111157.1	0.36696	[0.15100034; 0.58291962]	0.000867075	0.412902	0.0659958	FEM
NONHSAG037571.2	0.363204	[0.14941551; 0.57699214]	0.000868979	0	0.872555	FEM
NONHSAG048946.2	0.362728	[0.14919075; 0.57626461]	0.000870386	0	0.939269	FEM
NONHSAG085753.1	0.363264	[0.14934019; 0.57718730]	0.000873848	0	0.699808	FEM
NONHSAG090831.1	0.364009	[0.14953912; 0.57847847]	0.000879089	0.123732	0.323525	FEM
NONHSAG077429.1	0.364647	[0.14970965; 0.57958339]	0.000883565	0.269646	0.179713	FEM
NONHSAG050567.2	0.361907	[0.14829158; 0.57552147]	0.000898136	0	0.734619	FEM
NONHSAG012123.2	0.362509	[0.14823409; 0.57678426]	0.000913436	0.168225	0.278891	FEM
NONHSAG014560.3	0.362395	[0.14813407; 0.57665516]	0.000916129	0	0.539516	FEM
NONHSAG046452.2	-0.78704	[-1.25266388; -0.32141696]	0.00092309	0.626603	0.00192558	REM
NONHSAG096095.1	-0.361962	[-0.57635122; -0.14757298]	0.000935798	0.100551	0.346627	FEM
NONHSAG008835.3	0.360893	[0.14695441; 0.57483068]	0.000945278	0	0.510814	FEM
NONHSAG084640.1	-0.362053	[-0.57673588; -0.14736936]	0.000948266	0.390736	0.0803233	FEM
NONHSAG102450.1	0.361098	[0.14673423; 0.57546141]	0.000961208	0	0.459012	FEM
NONHSAG001156.2	0.361988	[0.14694151; 0.57703420]	0.000969362	0.24958	0.198673	FEM
NONHSAG030196.2	0.360086	[0.14614515; 0.57402657]	0.000970656	0	0.565072	FEM
NONHSAG058061.1	0.361265	[0.14658877; 0.57594176]	0.000972521	0.252972	0.195435	FEM
NONHSAG047011.2	0.360526	[0.14622702; 0.57482541]	0.000975824	0.00359811	0.439942	FEM
NONHSAG079299.1	0.362374	[0.14692271; 0.57782620]	0.000978697	0.465092	0.0381766	FEM
NONHSAG079320.1	0.359452	[0.14562484; 0.57327932]	0.000984785	0	0.632261	FEM
NONHSAG103591.1	0.358952	[0.14539504; 0.57250905]	0.000986258	0	0.935117	FEM
NONHSAG110005.1	0.358751	[0.14528458; 0.57221678]	0.000987824	0	0.887382	FEM
NONHSAG033553.2	0.359145	[0.14542806; 0.57286235]	0.000988707	0	0.890608	FEM
NONHSAG091332.1	0.360398	[0.14588600; 0.57491030]	0.000991378	0.14009	0.307135	FEM
NONHSAG047021.3	0.359146	[0.14501382; 0.57327769]	0.00101137	0	0.525493	FEM
NONHSAG102844.1	0.359931	[0.14532248; 0.57454001]	0.00101183	0.242526	0.205445	FEM
NONHSAG036310.2	0.358048	[0.14444589; 0.57165101]	0.00101829	0	0.897377	FEM
NONHSAG087357.1	0.359593	[0.14503602; 0.57415012]	0.00102012	0.20317	0.243989	FEM
NONHSAG095946.1	0.357776	[0.14428704; 0.57126518]	0.00102102	0	0.802551	FEM
NONHSAG089697.1	0.358762	[0.14460160; 0.57292164]	0.00102563	0.14713	0.300069	FEM
NONHSAG058808.1	0.360304	[0.14520520; 0.57540320]	0.00102664	0.330228	0.126122	FEM
NONHSAG087962.1	0.357391	[0.14390964; 0.57087222]	0.00103347	0	0.928286	FEM
NONHSAG068692.1	0.359428	[0.14454924; 0.57430741]	0.00104363	0.380088	0.0877028	FEM
NONHSAG081039.1	0.359383	[0.14449556; 0.57427027]	0.00104563	0.266236	0.182901	FEM
NONHSAG085074.1	0.358365	[0.14406060; 0.57266919]	0.00104708	0.167299	0.279821	FEM
NONHSAG109298.1	0.35958	[0.14433110; 0.57482849]	0.00105946	0.38712	0.0827936	FEM
NONHSAG111715.1	0.359469	[0.14423588; 0.57470270]	0.00106236	0.430247	0.0558072	FEM
NONHSAG039422.2	0.359446	[0.14412438; 0.57476702]	0.00106821	0.409551	0.0680692	FEM
NONHSAG009210.2	0.359092	[0.14380931; 0.57437554]	0.00107821	0.402947	0.0722534	FEM
NONHSAG085986.1	0.35848	[0.14353407; 0.57342543]	0.00107994	0.440937	0.0499903	FEM
NONHSAG073045.1	0.358005	[0.14327156; 0.57273834]	0.00108416	0.147749	0.299448	FEM
NONHSAG000487.2	-0.357447	[-0.57186449; -0.14302994]	0.00108523	0	0.532204	FEM
NONHSAG087975.1	0.355747	[0.14221545; 0.56927806]	0.00109312	0	0.829734	FEM
NONHSAG058199.1	0.35665	[0.14248566; 0.57081526]	0.00109849	0	0.639948	FEM
NONHSAG089531.1	0.354679	[0.14136320; 0.56799543]	0.00111853	0	0.971313	FEM
NONHSAG114690.1	0.35837	[0.14259611; 0.57414350]	0.00113279	0.520241	0.0180919	FEM
NONHSAG019300.2	0.355502	[0.14142961; 0.56957436]	0.00113433	0	0.44418	FEM
NONHSAG002637.2	0.356132	[0.14166009; 0.57060383]	0.00113555	0.0752734	0.371556	FEM
NONHSAG101998.1	0.355453	[0.14104896; 0.56985665]	0.00115642	0.0698401	0.376869	FEM
NONHSAG088954.2	0.354902	[0.14068607; 0.56911886]	0.00116536	0	0.489408	FEM
NONHSAG090025.1	0.353412	[0.14004750; 0.56677586]	0.00116833	0	0.930609	FEM
NONHSAG018551.2	0.353626	[0.13990783; 0.56734405]	0.00118241	0	0.867968	FEM
NONHSAG053907.3	0.355182	[0.14047758; 0.56988554]	0.00118528	0.180715	0.266376	FEM
NONHSAG054550.3	0.356772	[0.14109653; 0.57244663]	0.0011859	0.487794	0.0287641	FEM
NONHSAG111476.1	0.352652	[0.13933795; 0.56596702]	0.00119412	0	0.950005	FEM
NONHSAG111689.1	-0.981	[-1.57458873; -0.38741149]	0.0011986	0.774006	1.08216e-06	REM
NONHSAG021905.2	0.354455	[0.13992604; 0.56898370]	0.00120199	0	0.475743	FEM
NONHSAG075710.1	0.355773	[0.14026281; 0.57128379]	0.00121368	0.510883	0.0208436	FEM
NONHSAG031377.2	0.352799	[0.13893436; 0.56666428]	0.00122375	0	0.505274	FEM
NONHSAG066029.1	0.354379	[0.13953491; 0.56922345]	0.00122514	0.370636	0.0945109	FEM
NONHSAG051791.2	0.352185	[0.13865257; 0.56571704]	0.00122633	0	0.786447	FEM
NONHSAG056905.1	0.353809	[0.13923745; 0.56838046]	0.00122986	0.222082	0.225326	FEM
NONHSAG057830.1	0.353073	[0.13886534; 0.56728108]	0.00123524	0	0.464201	FEM
NONHSAG086934.1	0.352546	[0.13864675; 0.56644539]	0.00123597	0	0.475541	FEM
NONHSAG106703.1	0.35236	[0.13856233; 0.56615683]	0.00123669	0	0.608302	FEM
NONHSAG055129.2	0.351229	[0.13792052; 0.56453688]	0.00124967	0	0.957815	FEM
NONHSAG068051.1	0.351815	[0.13812012; 0.56550938]	0.00125168	0	0.783828	FEM
NONHSAG053779.3	0.354992	[0.13934832; 0.57063542]	0.00125294	0.467555	0.0370764	FEM
NONHSAG103840.1	0.352923	[0.13852645; 0.56732011]	0.00125359	0.120141	0.327115	FEM
NONHSAG029402.2	0.351001	[0.13768741; 0.56431502]	0.0012592	0	0.921984	FEM
NONHSAG070846.1	0.353649	[0.13863111; 0.56866759]	0.00126549	0.304377	0.14821	FEM
NONHSAG094891.1	0.351969	[0.13794136; 0.56599674]	0.00126756	0	0.452034	FEM
NONHSAG062813.1	0.351635	[0.13770380; 0.56556591]	0.00127469	0	0.488738	FEM
NONHSAG066293.1	0.350376	[0.13709306; 0.56365945]	0.00128263	0	0.96622	FEM
NONHSAG114983.1	0.350767	[0.13708223; 0.56445202]	0.00129371	0	0.840215	FEM
NONHSAG015771.2	0.351443	[0.13723379; 0.56565317]	0.00130137	0.183317	0.263773	FEM
NONHSAG002445.2	0.35041	[0.13681845; 0.56400090]	0.00130217	0	0.91562	FEM
NONHSAG069012.1	0.352374	[0.13752542; 0.56722323]	0.00130626	0.410138	0.0677034	FEM
NONHSAG102784.1	0.353022	[0.13777626; 0.56826773]	0.00130639	0.423768	0.059505	FEM
NONHSAG058512.1	0.353732	[0.13804152; 0.56942188]	0.00130718	0.494326	0.0263569	FEM
NONHSAG044037.2	0.351628	[0.13721621; 0.56604027]	0.00130749	0.0446117	0.401287	FEM
NONHSAG068940.1	0.352687	[0.13761273; 0.56776205]	0.00130863	0.482184	0.0309384	FEM
NONHSAG101597.1	0.35265	[0.13758121; 0.56771968]	0.00130979	0.495981	0.0257681	FEM
NONHSAG059548.1	-0.35066	[-0.56456018; -0.13675953]	0.00131289	0	0.650636	FEM
NONHSAG081453.1	0.350389	[0.13652765; 0.56425058]	0.00132159	0	0.762341	FEM
NONHSAG100915.1	0.352282	[0.13720681; 0.56735619]	0.00132559	0.336451	0.121008	FEM
NONHSAG060067.1	0.353548	[0.13761259; 0.56948360]	0.00133161	0.479285	0.0321008	FEM
NONHSAG070537.1	0.350372	[0.13621444; 0.56452878]	0.00134287	0.14803	0.299165	FEM
NONHSAG087693.1	0.351468	[0.13663847; 0.56629718]	0.00134302	0.240133	0.207753	FEM
NONHSAG090105.2	0.350912	[0.13638485; 0.56543980]	0.00134565	0.181254	0.265836	FEM
NONHSAG101312.1	0.352166	[0.13676649; 0.56756484]	0.00135302	0.373243	0.09261	FEM
NONHSAG071579.1	0.350532	[0.13594656; 0.56511695]	0.00136609	0.152143	0.295035	FEM
NONHSAG019046.2	0.34818	[0.13502474; 0.56133574]	0.00136679	0	0.974391	FEM
NONHSAG074562.1	0.351557	[0.13631902; 0.56679585]	0.00136787	0.391028	0.0801253	FEM
NONHSAG073043.1	0.348172	[0.13472367; 0.56162075]	0.00138814	0	0.850149	FEM
NONHSAG098163.1	0.350919	[0.13576338; 0.56607442]	0.00138979	0.399582	0.0744338	FEM
NONHSAG082771.2	0.348301	[0.13467838; 0.56192422]	0.00139502	0	0.762332	FEM
NONHSAG076429.2	0.348717	[0.13449966; 0.56293424]	0.0014197	0	0.610917	FEM
NONHSAG026040.2	-0.350051	[-0.56514155; -0.13496016]	0.00142364	0.329235	0.126946	FEM
NONHSAG085917.1	0.350329	[0.13503419; 0.56562308]	0.00142605	0.433967	0.0537424	FEM
NONHSAG106759.1	0.347203	[0.13375722; 0.56064821]	0.00143137	0	0.832746	FEM
NONHSAG039389.2	0.348141	[0.13404856; 0.56223281]	0.00143654	0.0026025	0.440862	FEM
NONHSAG055151.3	0.347665	[0.13374610; 0.56158424]	0.0014454	0	0.654871	FEM
NONHSAG093416.1	0.348527	[0.13393061; 0.56312300]	0.00145634	0.283709	0.166734	FEM
NONHSAG020200.2	0.347822	[0.13360394; 0.56203986]	0.00146051	0.184569	0.26252	FEM
NONHSAG057998.2	0.349083	[0.13406380; 0.56410145]	0.00146234	0.335353	0.121905	FEM
NONHSAG071171.1	0.347932	[0.13356834; 0.56229559]	0.00146635	0.159882	0.287264	FEM
NONHSAG091744.1	0.34779	[0.13342953; 0.56215045]	0.0014727	0.0901324	0.356941	FEM
NONHSAG109321.1	0.346402	[0.13289603; 0.55990853]	0.00147278	0	0.914897	FEM
NONHSAG031666.2	-0.349367	[-0.56471523; -0.13401817]	0.00147392	0.402232	0.0727139	FEM
NONHSAG085111.1	0.348712	[0.13370551; 0.56371838]	0.00147855	0.337211	0.12039	FEM
NONHSAG031009.2	-0.346078	[-0.55974960; -0.13240726]	0.0015006	0	0.686011	FEM
NONHSAG110101.1	0.345301	[0.13209606; 0.55850520]	0.00150164	0	0.929753	FEM
NONHSAG109943.1	0.347147	[0.13278231; 0.56151081]	0.00150317	0.0898823	0.357188	FEM
NONHSAG092789.1	0.345977	[0.13230079; 0.55965304]	0.0015058	0	0.751167	FEM
NONHSAG093603.1	0.344881	[0.13184970; 0.55791257]	0.00150828	0	0.996991	FEM
NONHSAG098693.1	0.346282	[0.13231311; 0.56025174]	0.00151386	0.165219	0.281907	FEM
NONHSAG063585.1	0.347554	[0.13268677; 0.56242053]	0.00152251	0.331849	0.124783	FEM
NONHSAG005058.3	0.347176	[0.13249816; 0.56185311]	0.00152594	0.186822	0.260269	FEM
NONHSAG112427.1	0.347321	[0.13254891; 0.56209246]	0.0015263	0.246869	0.201269	FEM
NONHSAG067658.1	0.345178	[0.13170825; 0.55864872]	0.0015281	0	0.871118	FEM
NONHSAG058589.1	0.345096	[0.13156211; 0.55862958]	0.00153707	0	0.819698	FEM
NONHSAG114992.1	0.344255	[0.13123329; 0.55727583]	0.0015377	0	0.998099	FEM
NONHSAG109778.1	0.347375	[0.13228643; 0.56246440]	0.00154837	0.295336	0.156227	FEM
NONHSAG051155.2	0.346897	[0.13200633; 0.56178763]	0.00155607	0.336885	0.120655	FEM
NONHSAG099313.1	0.3479	[0.13238555; 0.56341426]	0.00155626	0.422426	0.0602872	FEM
NONHSAG045391.2	-0.346691	[-0.56147458; -0.13190775]	0.00155766	0.327394	0.128479	FEM
NONHSAG058014.1	0.345185	[0.13125347; 0.55911602]	0.0015641	0	0.608408	FEM
NONHSAG014863.2	0.345158	[0.13111789; 0.55919830]	0.00157408	0.13638	0.310856	FEM
NONHSAG113810.1	0.347657	[0.13204553; 0.56326875]	0.0015758	0.510024	0.0211093	FEM
NONHSAG068655.1	0.344474	[0.13066539; 0.55828256]	0.00158954	0	0.590876	FEM
NONHSAG033148.2	0.345226	[0.13076077; 0.55969165]	0.00160485	0.0202171	0.424449	FEM
NONHSAG041907.2	0.34501	[0.13063363; 0.55938538]	0.00160851	0.13308	0.314165	FEM
NONHSAG101487.1	0.344472	[0.13022268; 0.55872057]	0.00162541	0	0.514373	FEM
NONHSAG001896.2	0.345042	[0.13043416; 0.55964904]	0.00162574	0.320447	0.134325	FEM
NONHSAG024176.2	0.343236	[0.12970804; 0.55676418]	0.00162932	0	0.702062	FEM
NONHSAG016886.2	0.345029	[0.13031014; 0.55974702]	0.00163549	0.280129	0.170011	FEM
NONHSAG098063.1	0.343124	[0.12958254; 0.55666493]	0.00163617	0	0.753756	FEM
NONHSAG013409.2	0.34414	[0.12994868; 0.55833105]	0.00163762	0	0.479325	FEM
NONHSAG103231.1	0.343287	[0.12957616; 0.55699720]	0.00164178	0	0.743309	FEM
NONHSAG114671.1	0.343488	[0.12964067; 0.55733628]	0.00164275	0	0.795211	FEM
NONHSAG056721.1	0.344054	[0.12979322; 0.55831417]	0.00164777	0.098755	0.348408	FEM
NONHSAG000593.2	-0.343794	[-0.55789510; -0.12969356]	0.00164792	0.158258	0.288895	FEM
NONHSAG105039.1	0.343939	[0.12972409; 0.55815321]	0.0016499	0.102997	0.344199	FEM
NONHSAG060851.1	0.343434	[0.12943930; 0.55742784]	0.00165775	0	0.658217	FEM
NONHSAG014341.2	0.343439	[0.12944098; 0.55743667]	0.00165777	0	0.631586	FEM
NONHSAG074756.1	0.342749	[0.12912189; 0.55637708]	0.00166272	0	0.791153	FEM
NONHSAG074672.1	0.342225	[0.12876424; 0.55568493]	0.00167616	0	0.775521	FEM
NONHSAG022295.2	0.34538	[0.12983352; 0.56092561]	0.00168602	0.465792	0.0378621	FEM
NONHSAG086071.1	0.343126	[0.12887892; 0.55737267]	0.0016951	0.169754	0.277358	FEM
NONHSAG098159.1	0.343821	[0.12909103; 0.55855193]	0.00169927	0.285547	0.165059	FEM
NONHSAG009053.2	0.342878	[0.12859380; 0.55716233]	0.00171145	0.29158	0.159598	FEM
NONHSAG007921.2	0.343569	[0.12865626; 0.55848190]	0.00172828	0.326392	0.129316	FEM
NONHSAG073033.1	0.342164	[0.12810526; 0.55622259]	0.00173042	0	0.49112	FEM
NONHSAG087020.1	0.342151	[0.12807238; 0.55622981]	0.00173284	0.151253	0.295929	FEM
NONHSAG111806.1	0.341311	[0.12763751; 0.55498429]	0.00174329	0	0.834519	FEM
NONHSAG024843.2	0.341692	[0.12766079; 0.55572293]	0.00175367	0	0.638287	FEM
NONHSAG104015.1	0.340894	[0.12726567; 0.55452172]	0.00176216	0	0.716845	FEM
NONHSAG019381.3	0.341596	[0.12749729; 0.55569415]	0.00176483	0.109298	0.337932	FEM
NONHSAG048603.2	0.343662	[0.12821332; 0.55911107]	0.00176965	0.46692	0.037358	FEM
NONHSAG079721.1	0.342272	[0.12765974; 0.55688495]	0.00177272	0.276965	0.172923	FEM
NONHSAG093978.1	0.340555	[0.12690178; 0.55420904]	0.00178312	0	0.646147	FEM
NONHSAG025349.2	0.343878	[0.12801942; 0.55973567]	0.0017937	0.552434	0.0105068	FEM
NONHSAG103987.1	0.340169	[0.12658360; 0.55375355]	0.00179861	0	0.717987	FEM
NONHSAG112653.1	0.339698	[0.12636402; 0.55303286]	0.0018026	0	0.857179	FEM
NONHSAG090048.1	0.344	[0.12785422; 0.56014590]	0.00181235	0.521993	0.0176052	FEM
NONHSAG032411.2	0.340105	[0.12632866; 0.55388088]	0.00181934	0	0.676252	FEM
NONHSAG100257.1	0.340434	[0.12641666; 0.55445103]	0.00182242	0.0852685	0.361738	FEM
NONHSAG074081.1	0.339682	[0.12606525; 0.55329868]	0.00182895	0	0.751137	FEM
NONHSAG024426.2	-0.339627	[-0.55325046; -0.12600312]	0.00183272	0	0.548711	FEM
NONHSAG107025.1	0.339854	[0.12601013; 0.55369819]	0.00183974	0	0.734726	FEM
NONHSAG079875.1	0.341504	[0.12634823; 0.55665992]	0.0018646	0.379244	0.0883013	FEM
NONHSAG080887.1	0.339286	[0.12528575; 0.55328621]	0.00188692	0	0.468017	FEM
NONHSAG006631.2	-0.340162	[-0.55472228; -0.12560078]	0.00188769	0.173374	0.273728	FEM
NONHSAG074714.1	0.337651	[0.12465720; 0.55064418]	0.00188923	0	0.989911	FEM
NONHSAG097624.1	0.339275	[0.12501350; 0.55353696]	0.00191191	0.0584264	0.38797	FEM
NONHSAG016312.2	0.33901	[0.12490953; 0.55310947]	0.00191248	0.0294544	0.415735	FEM
NONHSAG032416.3	0.339532	[0.12506354; 0.55400067]	0.00191609	0.106164	0.34105	FEM
NONHSAG005952.2	0.339573	[0.12506417; 0.55408176]	0.00191744	0.0997797	0.347392	FEM
NONHSAG031423.2	0.339169	[0.12482790; 0.55351030]	0.00192567	0.194178	0.25293	FEM
NONHSAG073994.1	0.33912	[0.12474414; 0.55349493]	0.00193184	0.341807	0.116675	FEM
NONHSAG071283.1	0.338575	[0.12441987; 0.55273022]	0.00194358	0	0.497006	FEM
NONHSAG006984.2	0.33926	[0.12460080; 0.55391956]	0.0019503	0.19035	0.256747	FEM
NONHSAG026459.2	0.338234	[0.12420426; 0.55226472]	0.00195219	0.00876167	0.435154	FEM
NONHSAG084457.1	0.336459	[0.12329602; 0.54962243]	0.00197686	0	0.976788	FEM
NONHSAG095976.1	0.336723	[0.12334264; 0.55010267]	0.00198169	0	0.845737	FEM
NONHSAG094830.1	0.338624	[0.12401247; 0.55323532]	0.00198425	0.358789	0.103372	FEM
NONHSAG110285.1	0.338829	[0.12395806; 0.55370085]	0.00199677	0.318211	0.136227	FEM
NONHSAG106777.1	0.336207	[0.12285559; 0.54955856]	0.00201075	0	0.767837	FEM
NONHSAG102658.1	0.33747	[0.12329111; 0.55164849]	0.00201328	0.183024	0.264066	FEM
NONHSAG056218.1	0.336282	[0.12280806; 0.54975619]	0.0020181	0	0.771959	FEM
NONHSAG068402.2	0.337326	[0.12312531; 0.55152667]	0.00202437	0.0672248	0.37942	FEM
NONHSAG074086.1	0.337548	[0.12317575; 0.55192071]	0.00202738	0.155892	0.291271	FEM
NONHSAG032422.2	0.338668	[0.12357814; 0.55375828]	0.002028	0.417067	0.0634655	FEM
NONHSAG095131.1	0.336228	[0.12267776; 0.54977771]	0.00202897	0	0.665444	FEM
NONHSAG090992.1	0.33644	[0.12265013; 0.55022914]	0.00203933	0	0.495268	FEM
NONHSAG025816.2	0.336216	[0.12255826; 0.54987320]	0.00204035	0	0.866696	FEM
NONHSAG005467.2	0.338625	[0.12333567; 0.55391384]	0.00205027	0.49818	0.0249989	FEM
NONHSAG090621.1	0.336039	[0.12239362; 0.54968474]	0.0020503	0	0.645396	FEM
NONHSAG109023.1	0.339135	[0.12346589; 0.55480391]	0.00205575	0.427931	0.057114	FEM
NONHSAG060459.1	0.336665	[0.12251328; 0.55081674]	0.00206106	0.143352	0.303861	FEM
NONHSAG000813.2	0.335492	[0.12207235; 0.54891107]	0.00206246	0	0.929364	FEM
NONHSAG091995.1	0.337388	[0.12264568; 0.55213014]	0.00207408	0.297658	0.154155	FEM
NONHSAG112045.1	-0.338246	[-0.55367337; -0.12281933]	0.0020879	0.43849	0.0512904	FEM
NONHSAG064959.1	0.338499	[0.12290049; 0.55409778]	0.00208896	0.514107	0.0198663	FEM
NONHSAG014606.2	0.335188	[0.12169090; 0.54868422]	0.00208969	0	0.855086	FEM
NONHSAG014662.2	0.334691	[0.12140259; 0.54798023]	0.00210066	0	0.883685	FEM
NONHSAG058522.1	0.33528	[0.12160507; 0.54895577]	0.00210179	0	0.679376	FEM
NONHSAG090558.1	0.336435	[0.12191778; 0.55095237]	0.00211254	0.327754	0.128179	FEM
NONHSAG037962.2	0.335152	[0.12121801; 0.54908581]	0.00213655	0	0.602765	FEM
NONHSAG058244.1	0.336819	[0.12181468; 0.55182418]	0.00213721	0.375343	0.0910908	FEM
NONHSAG112244.1	0.335491	[0.12133177; 0.54965006]	0.00213746	0.166449	0.280673	FEM
NONHSAG018061.2	0.334451	[0.12094568; 0.54795583]	0.00213848	0	0.788652	FEM
NONHSAG088490.1	0.335155	[0.12118739; 0.54912234]	0.0021398	0	0.491282	FEM
NONHSAG039371.3	0.335582	[0.12129527; 0.54986972]	0.00214461	0.0532398	0.392986	FEM
NONHSAG109843.1	0.33489	[0.12095600; 0.54882315]	0.00215377	0	0.4616	FEM
NONHSAG093077.1	0.335817	[0.12128938; 0.55034485]	0.00215394	0.254615	0.193871	FEM
NONHSAG002436.2	0.334811	[0.12089819; 0.54872295]	0.0021568	0	0.571485	FEM
NONHSAG008301.2	0.335204	[0.12102416; 0.54938463]	0.00215848	0.092129	0.354968	FEM
NONHSAG088986.1	-0.334329	[-0.54807806; -0.12058004]	0.00217179	0	0.687634	FEM
NONHSAG054939.2	0.333859	[0.12040167; 0.54731693]	0.00217273	0	0.754019	FEM
NONHSAG006678.3	0.336873	[0.12139207; 0.55235314]	0.0021827	0.465373	0.0380503	FEM
NONHSAG113391.1	0.334608	[0.12055676; 0.54865842]	0.0021847	0.124591	0.322666	FEM
NONHSAG103996.1	0.333844	[0.12025439; 0.54743364]	0.00218756	0	0.799467	FEM
NONHSAG112627.1	0.33422	[0.12036037; 0.54808058]	0.00219066	0	0.623789	FEM
NONHSAG031260.2	-0.333535	[-0.54699668; -0.12007362]	0.00219486	0	0.742785	FEM
NONHSAG067642.2	0.336898	[0.12117677; 0.55261988]	0.00220609	0.512474	0.0203576	FEM
NONHSAG102065.1	0.337211	[0.12128360; 0.55313784]	0.00220667	0.540983	0.0128847	FEM
NONHSAG038480.3	0.33662	[0.12104270; 0.55219787]	0.00220966	0.497366	0.0252818	FEM
NONHSAG096770.1	0.334989	[0.12043497; 0.54954375]	0.0022119	0.325324	0.130211	FEM
NONHSAG106602.1	-0.335081	[-0.54971148; -0.12045026]	0.00221375	0.337109	0.120472	FEM
NONHSAG024017.2	0.333277	[0.11975338; 0.54680007]	0.00221888	0	0.80925	FEM
NONHSAG057306.1	0.333976	[0.11998379; 0.54796726]	0.00222107	0	0.535625	FEM
NONHSAG100659.1	0.333843	[0.11993235; 0.54775281]	0.00222146	0	0.540905	FEM
NONHSAG073684.1	0.334931	[0.12020117; 0.54966149]	0.00223442	0.291098	0.160032	FEM
NONHSAG099944.1	0.332106	[0.11902780; 0.54518443]	0.00225153	0	0.982689	FEM
NONHSAG022201.2	0.335035	[0.12005930; 0.55001083]	0.00225348	0.481823	0.0310819	FEM
NONHSAG113707.1	0.334852	[0.11993278; 0.54977096]	0.00225999	0.397371	0.0758853	FEM
NONHSAG066852.1	0.33342	[0.11941866; 0.54742079]	0.00226011	0.044022	0.401853	FEM
NONHSAG052092.2	0.333798	[0.11950885; 0.54808624]	0.00226496	0.189468	0.257627	FEM
NONHSAG046374.2	-0.333403	[-0.54752218; -0.11928292]	0.00227407	0	0.619878	FEM
NONHSAG038863.2	0.33364	[0.11930494; 0.54797532]	0.00228088	0.161746	0.285394	FEM
NONHSAG100572.1	0.334071	[0.11943681; 0.54870601]	0.00228329	0.361193	0.101545	FEM
NONHSAG076102.1	-0.335521	[-0.55110106; -0.11994088]	0.00228482	0.484576	0.0299995	FEM
NONHSAG048039.2	0.335254	[0.11972996; 0.55077825]	0.00229729	0.49577	0.0258427	FEM
NONHSAG014806.2	0.333156	[0.11895162; 0.54736055]	0.00230046	0.0892711	0.357791	FEM
NONHSAG026118.2	0.332843	[0.11883254; 0.54685423]	0.00230127	0	0.50673	FEM
NONHSAG030440.3	0.333996	[0.11912396; 0.54886824]	0.00231435	0.317471	0.136859	FEM
NONHSAG112972.1	0.332168	[0.11843037; 0.54590529]	0.00231891	0	0.770282	FEM
NONHSAG052268.2	0.335826	[0.11972720; 0.55192505]	0.00231973	0.554402	0.0101319	FEM
NONHSAG106345.1	0.334079	[0.11908981; 0.54906851]	0.00232132	0.327413	0.128463	FEM
NONHSAG048755.2	0.332884	[0.11865314; 0.54711574]	0.0023225	0.13865	0.30858	FEM
NONHSAG069676.1	0.331996	[0.11825848; 0.54573286]	0.00233109	0	0.649271	FEM
NONHSAG010457.2	0.333242	[0.11863036; 0.54785302]	0.00233901	0.222801	0.224621	FEM
NONHSAG001885.2	0.331157	[0.11781695; 0.54449664]	0.00234692	0	0.95984	FEM
NONHSAG012134.2	-0.332015	[-0.54592668; -0.11810409]	0.00234895	0	0.67825	FEM
NONHSAG039967.2	0.330356	[0.11729440; 0.54341816]	0.00237353	0	0.973068	FEM
NONHSAG039560.2	0.332967	[0.11822117; 0.54771257]	0.00237354	0.284116	0.166363	FEM
NONHSAG053931.2	0.33203	[0.11779666; 0.54626332]	0.00238383	0	0.497282	FEM
NONHSAG095616.1	0.330479	[0.11722971; 0.54372853]	0.00238572	0	0.9298	FEM
NONHSAG013611.2	0.330998	[0.11735583; 0.54463939]	0.00239223	0	0.686356	FEM
NONHSAG107345.1	-0.333065	[-0.54814413; -0.11798628]	0.00240375	0.498789	0.0247883	FEM
NONHSAG052206.2	0.331685	[0.11748532; 0.54588485]	0.00240512	0.00157244	0.441813	FEM
NONHSAG078517.1	0.329996	[0.11685786; 0.54313482]	0.00240844	0	0.939097	FEM
NONHSAG008355.3	0.330442	[0.11700695; 0.54387760]	0.00240945	0	0.898872	FEM
NONHSAG038376.2	0.33167	[0.11736576; 0.54597335]	0.00241803	0.20807	0.239134	FEM
NONHSAG047456.2	0.330489	[0.11692576; 0.54405321]	0.00242058	0	0.623097	FEM
NONHSAG062714.1	0.333517	[0.11793429; 0.54909999]	0.00242766	0.477476	0.0328399	FEM
NONHSAG101295.1	-0.334471	[-0.55075621; -0.11818569]	0.00243736	0.519286	0.018361	FEM
NONHSAG105506.1	0.330312	[0.11668658; 0.54393776]	0.00244075	0	0.7583	FEM
NONHSAG084320.1	0.331186	[0.11693063; 0.54544052]	0.00244814	0.174704	0.272395	FEM
NONHSAG091591.1	0.330264	[0.11659382; 0.54393439]	0.00244946	0	0.617394	FEM
NONHSAG062829.1	0.330333	[0.11656034; 0.54410550]	0.0024561	0	0.604068	FEM
NONHSAG091298.2	0.33012	[0.11647421; 0.54376597]	0.00245737	0	0.473439	FEM
NONHSAG062290.1	0.331473	[0.11691347; 0.54603344]	0.00246177	0.390203	0.0806852	FEM
NONHSAG079395.1	0.332152	[0.11696694; 0.54733708]	0.00248316	0.478193	0.0325456	FEM
NONHSAG079671.1	0.332204	[0.11697616; 0.54743170]	0.00248421	0.426489	0.0579361	FEM
NONHSAG082488.1	0.330596	[0.11640993; 0.54478212]	0.00248421	0	0.503168	FEM
NONHSAG031996.2	-0.329838	[-0.54354156; -0.11613481]	0.00248517	0	0.768887	FEM
NONHSAG094846.1	0.332563	[0.11699287; 0.54813371]	0.00249689	0.533274	0.0146805	FEM
NONHSAG090758.1	0.330681	[0.11632086; 0.54504119]	0.00249804	0.0407989	0.404938	FEM
NONHSAG070675.1	0.330132	[0.11611357; 0.54415102]	0.00249971	0.211339	0.235901	FEM
NONHSAG034702.2	0.330402	[0.11615712; 0.54464738]	0.0025057	0.164627	0.282502	FEM
NONHSAG064451.1	0.329622	[0.11585485; 0.54338896]	0.00250898	0	0.615254	FEM
NONHSAG018733.2	0.328989	[0.11561673; 0.54236031]	0.0025108	0	0.892826	FEM
NONHSAG102525.1	0.331658	[0.11646959; 0.54684648]	0.00252075	0.541176	0.0128418	FEM
NONHSAG000286.2	0.329063	[0.11550990; 0.54261592]	0.00252645	0	0.83474	FEM
NONHSAG015899.2	0.330492	[0.11596623; 0.54501772]	0.00253178	0.132408	0.314838	FEM
NONHSAG060414.1	0.329882	[0.11565124; 0.54411304]	0.0025437	0.11313	0.334113	FEM
NONHSAG094423.1	0.329686	[0.11557475; 0.54379653]	0.0025446	0.0972251	0.349925	FEM
NONHSAG095083.1	0.328123	[0.11499589; 0.54125080]	0.00254831	0	0.850187	FEM
NONHSAG074688.1	0.32918	[0.11534109; 0.54301849]	0.00255128	0	0.595955	FEM
NONHSAG085387.1	0.33007	[0.11561318; 0.54452585]	0.00255598	0.331383	0.125167	FEM
NONHSAG067200.1	0.331278	[0.11600138; 0.54655508]	0.00256014	0.468843	0.0365086	FEM
NONHSAG002997.2	0.329755	[0.11541501; 0.54409557]	0.00256646	0.0421017	0.403692	FEM
NONHSAG097659.1	0.33205	[0.11621558; 0.54788468]	0.00256677	0.541279	0.0128189	FEM
NONHSAG067837.1	0.328586	[0.11498186; 0.54218930]	0.0025693	0	0.691971	FEM
NONHSAG042528.2	0.329759	[0.11523904; 0.54427844]	0.00258761	0.234042	0.213652	FEM
NONHSAG113560.1	0.329284	[0.11500692; 0.54356198]	0.00259558	0.0221029	0.422675	FEM
NONHSAG008665.2	0.328271	[0.11444418; 0.54209824]	0.00262085	0	0.464937	FEM
NONHSAG067192.1	0.330488	[0.11497021; 0.54600623]	0.00265074	0.503495	0.0232005	FEM
NONHSAG108646.1	0.328275	[0.11410015; 0.54245005]	0.00266301	0.0750087	0.371816	FEM
NONHSAG076743.1	0.328334	[0.11409451; 0.54257350]	0.00266622	0.1812	0.26589	FEM
NONHSAG013283.2	0.326932	[0.11358353; 0.54027952]	0.00266914	0	0.776949	FEM
NONHSAG060726.1	0.328404	[0.11401176; 0.54279621]	0.0026794	0.233201	0.214469	FEM
NONHSAG051694.2	0.329459	[0.11435946; 0.54455921]	0.00268169	0.425897	0.0582754	FEM
NONHSAG109055.1	0.327275	[0.11357678; 0.54097338]	0.00268473	0	0.702379	FEM
NONHSAG109905.1	0.330317	[0.11462283; 0.54601064]	0.00268589	0.480921	0.0314417	FEM
NONHSAG015718.2	0.327735	[0.11372045; 0.54174885]	0.00268668	0.151527	0.295655	FEM
NONHSAG050665.2	0.327117	[0.11348405; 0.54074976]	0.00268942	0	0.594102	FEM
NONHSAG056487.1	0.329765	[0.11432333; 0.54520753]	0.00269922	0.542899	0.0124631	FEM
NONHSAG008604.2	-0.328168	[-0.54257460; -0.11376094]	0.00270028	0.10787	0.339353	FEM
NONHSAG108472.1	0.329297	[0.11400675; 0.54458718]	0.00271832	0.455092	0.0428426	FEM
NONHSAG050893.2	0.327516	[0.11330268; 0.54172845]	0.00272924	0.278094	0.171883	FEM
NONHSAG077119.1	0.328258	[0.11354025; 0.54297562]	0.00273165	0.291073	0.160054	FEM
NONHSAG019064.2	0.328803	[0.11372207; 0.54388331]	0.00273247	0.435399	0.0529589	FEM
NONHSAG106643.1	0.325947	[0.11262763; 0.53926541]	0.00274592	0	0.828353	FEM
NONHSAG078033.2	0.32667	[0.11287643; 0.54046315]	0.00274606	0	0.65064	FEM
NONHSAG010313.2	-0.328141	[-0.54294168; -0.11333981]	0.0027517	0.419201	0.0621894	FEM
NONHSAG057041.1	0.326179	[0.11260404; 0.53975419]	0.00275907	0	0.691743	FEM
NONHSAG113992.1	0.326203	[0.11261116; 0.53979509]	0.00275922	0	0.657977	FEM
NONHSAG065093.1	0.327651	[0.11308545; 0.54221688]	0.00276245	0.323375	0.131849	FEM
NONHSAG025048.2	-0.327245	[-0.54155147; -0.11293839]	0.00276332	0.324936	0.130536	FEM
NONHSAG093676.1	0.325715	[0.11226325; 0.53916626]	0.00278204	0	0.715036	FEM
NONHSAG067755.1	0.326768	[0.11253701; 0.54099989]	0.00279344	0.136573	0.310662	FEM
NONHSAG026359.3	0.327403	[0.11275032; 0.54205505]	0.00279409	0.178801	0.268291	FEM
NONHSAG020716.3	0.328432	[0.11300870; 0.54385473]	0.0028063	0.480992	0.0314131	FEM
NONHSAG015053.2	0.326372	[0.11226673; 0.54047740]	0.00281056	0.0758616	0.37098	FEM
NONHSAG104611.2	0.325236	[0.11186557; 0.53860674]	0.00281191	0	0.877439	FEM
NONHSAG062852.2	0.325126	[0.11180032; 0.53845088]	0.00281542	0	0.93096	FEM
NONHSAG037105.2	0.327594	[0.11264187; 0.54254523]	0.00281632	0.33025	0.126104	FEM
NONHSAG074544.2	0.325649	[0.11195958; 0.53933910]	0.0028181	0	0.610138	FEM
NONHSAG085690.1	0.326093	[0.11202544; 0.54016012]	0.00282926	0.157265	0.289893	FEM
NONHSAG056777.1	0.326925	[0.11228615; 0.54156399]	0.0028325	0.207763	0.239437	FEM
NONHSAG041057.2	0.327562	[0.11245300; 0.54267171]	0.0028392	0.505003	0.0227063	FEM
NONHSAG098058.1	0.324006	[0.11117376; 0.53683729]	0.00284678	0	0.998615	FEM
NONHSAG089260.1	0.326184	[0.11191896; 0.54044901]	0.00284707	0.190331	0.256765	FEM
NONHSAG096950.1	0.324605	[0.11134994; 0.53785920]	0.0028506	0	0.919559	FEM
NONHSAG055401.3	0.325001	[0.11147734; 0.53852439]	0.00285172	0	0.791329	FEM
NONHSAG068715.1	0.324626	[0.11132356; 0.53792863]	0.00285501	0	0.848774	FEM
NONHSAG059825.1	0.325292	[0.11154631; 0.53903810]	0.00285575	0	0.61566	FEM
NONHSAG095097.1	0.326111	[0.11177669; 0.54044611]	0.00286231	0.065998	0.380615	FEM
NONHSAG069753.1	0.325329	[0.11133918; 0.53931791]	0.00288443	0.104278	0.342926	FEM
NONHSAG062221.1	0.326343	[0.11161629; 0.54107005]	0.00289361	0.240988	0.206927	FEM
NONHSAG055480.2	0.325212	[0.11121477; 0.53920953]	0.00289554	0.0585874	0.387814	FEM
NONHSAG094131.1	0.324902	[0.11096316; 0.53884118]	0.00291476	0	0.52311	FEM
NONHSAG055019.2	0.324793	[0.11091428; 0.53867126]	0.00291628	0	0.457196	FEM
NONHSAG061342.1	0.324843	[0.11089678; 0.53878965]	0.00292088	0.191361	0.255739	FEM
NONHSAG027672.2	0.323506	[0.11043645; 0.53657644]	0.00292141	0	0.941901	FEM
NONHSAG028415.2	0.325138	[0.11092386; 0.53935209]	0.00293062	0.158653	0.288499	FEM
NONHSAG020418.2	0.324224	[0.11053987; 0.53790886]	0.00294026	0	0.44559	FEM
NONHSAG037369.2	0.324935	[0.11072876; 0.53914220]	0.00294739	0.0336314	0.411771	FEM
NONHSAG113955.1	0.325145	[0.11077598; 0.53951474]	0.00295063	0.0521301	0.394056	FEM
NONHSAG079444.1	0.326729	[0.11124118; 0.54221585]	0.00296048	0.44815	0.0462685	FEM
NONHSAG047309.2	0.324928	[0.11061610; 0.53924055]	0.0029621	0.237561	0.210239	FEM
NONHSAG105918.1	0.326586	[0.11112740; 0.54204376]	0.00296915	0.500734	0.0241237	FEM
NONHSAG042381.2	-0.326472	[-0.54196223; -0.11098121]	0.0029835	0.543555	0.0123211	FEM
NONHSAG068364.1	0.325695	[0.11069061; 0.54069870]	0.00298705	0.545534	0.0118992	FEM
NONHSAG067477.1	-0.326387	[-0.54185724; -0.11091587]	0.00298837	0.491283	0.0274618	FEM
NONHSAG051715.2	0.325332	[0.11055007; 0.54011449]	0.00298939	0.213782	0.23349	FEM
NONHSAG065614.1	0.324935	[0.11031090; 0.53955844]	0.00300342	0.317002	0.13726	FEM
NONHSAG038396.2	0.324799	[0.11021990; 0.53937816]	0.0030095	0.264038	0.184963	FEM
NONHSAG024614.2	0.324326	[0.11001360; 0.53863810]	0.0030157	0.228296	0.219247	FEM
NONHSAG070558.1	0.326374	[0.11070691; 0.54204051]	0.00301588	0.478506	0.0324179	FEM
NONHSAG029332.2	0.322801	[0.10946357; 0.53613836]	0.00302017	0	0.870766	FEM
NONHSAG046925.2	0.324209	[0.10982086; 0.53859652]	0.00303652	0.228331	0.219212	FEM
NONHSAG002698.2	-0.324723	[-0.53948282; -0.10996417]	0.00304076	0.296353	0.155318	FEM
NONHSAG009283.2	0.323794	[0.10960517; 0.53798286]	0.00304681	0.167122	0.279998	FEM
NONHSAG024795.2	0.321996	[0.10888976; 0.53510183]	0.00306153	0	0.966194	FEM
NONHSAG113597.1	0.324404	[0.10965324; 0.53915407]	0.0030685	0.398618	0.0750648	FEM
NONHSAG029500.2	-0.324666	[-0.53961951; -0.10971220]	0.00307257	0.458688	0.0411279	FEM
NONHSAG013608.2	0.323982	[0.10946181; 0.53850309]	0.00307525	0.31687	0.137374	FEM
NONHSAG051964.2	0.324041	[0.10938681; 0.53869555]	0.00308833	0.28688	0.163848	FEM
NONHSAG032903.2	0.321892	[0.10861331; 0.53517092]	0.00309502	0	0.919433	FEM
NONHSAG113708.1	0.325719	[0.10985290; 0.54158550]	0.00310214	0.55076	0.0108335	FEM
NONHSAG093833.2	0.321588	[0.10844613; 0.53473053]	0.00310404	0	0.934833	FEM
NONHSAG046880.2	-0.322019	[-0.53552825; -0.10851070]	0.00311533	0	0.642241	FEM
NONHSAG047445.2	0.320804	[0.10800528; 0.53360212]	0.00312879	0	0.993112	FEM
NONHSAG107787.1	0.324177	[0.10910620; 0.53924704]	0.00313362	0.381079	0.0870031	FEM
NONHSAG094035.1	0.322285	[0.10842904; 0.53614013]	0.00313929	0	0.4554	FEM
NONHSAG097003.1	0.321685	[0.10820093; 0.53516978]	0.00314302	0	0.807089	FEM
NONHSAG096615.1	0.321701	[0.10813187; 0.53527056]	0.00315351	0	0.663089	FEM
NONHSAG113149.1	0.320911	[0.10775190; 0.53407006]	0.00316973	0	0.937569	FEM
NONHSAG078235.1	0.321508	[0.10788750; 0.53512837]	0.00317893	0	0.743395	FEM
NONHSAG033516.2	0.32189	[0.10800714; 0.53577337]	0.00318016	0	0.584058	FEM
NONHSAG094046.1	0.324136	[0.10864889; 0.53962346]	0.00319595	0.457983	0.0414608	FEM
NONHSAG111962.1	0.320961	[0.10747335; 0.53444917]	0.00321188	0	0.782666	FEM
NONHSAG025938.2	0.322851	[0.10807866; 0.53762410]	0.00321582	0.277484	0.172445	FEM
NONHSAG055409.2	0.321214	[0.10749485; 0.53493364]	0.00322095	0	0.550084	FEM
NONHSAG094807.1	0.323899	[0.10835519; 0.53944263]	0.00322637	0.502184	0.0236361	FEM
NONHSAG049366.2	-0.321645	[-0.53568948; -0.10760074]	0.00322644	0.197861	0.249264	FEM
NONHSAG028243.3	-1.27816	[-2.12886458; -0.42745041]	0.00323131	0.876257	2.74498e-14	REM
NONHSAG113698.1	0.323052	[0.10799659; 0.53810671]	0.00323712	0.407308	0.0694759	FEM
NONHSAG101414.1	0.320552	[0.10715765; 0.53394548]	0.00323758	0	0.783537	FEM
NONHSAG016693.2	0.323383	[0.10810310; 0.53866367]	0.00323775	0.437573	0.0517825	FEM
NONHSAG014414.2	0.321673	[0.10746087; 0.53588492]	0.00324789	0.0811037	0.365836	FEM
NONHSAG044357.2	0.321846	[0.10746859; 0.53622331]	0.00325512	0.186347	0.260744	FEM
NONHSAG028257.2	0.322929	[0.10780483; 0.53805406]	0.00325879	0.38692	0.0829318	FEM
NONHSAG011778.2	0.323508	[0.10796607; 0.53905020]	0.00326338	0.522106	0.0175741	FEM
NONHSAG095940.2	0.321229	[0.10700255; 0.53545459]	0.00329284	0.17191	0.275196	FEM
NONHSAG000967.2	0.319397	[0.10638573; 0.53240927]	0.00329385	0	0.934265	FEM
NONHSAG004611.2	0.320547	[0.10658378; 0.53450933]	0.00332091	0.0228201	0.422	FEM
NONHSAG078453.1	0.320001	[0.10638794; 0.53361391]	0.00332303	0	0.757051	FEM
NONHSAG032906.2	0.320319	[0.10645714; 0.53418168]	0.00332843	0	0.561915	FEM
NONHSAG054155.3	0.320952	[0.10666300; 0.53524006]	0.00332905	0.163685	0.283447	FEM
NONHSAG057738.1	0.320773	[0.10658377; 0.53496164]	0.00333197	0.0455541	0.400383	FEM
NONHSAG041336.2	0.322018	[0.10698174; 0.53705386]	0.00333427	0.405454	0.0706497	FEM
NONHSAG017278.2	0.320133	[0.10632349; 0.53394298]	0.00333902	0	0.571506	FEM
NONHSAG083412.1	0.319664	[0.10615154; 0.53317555]	0.00334138	0	0.749275	FEM
NONHSAG014611.2	0.321037	[0.10655684; 0.53551717]	0.00334887	0.206295	0.240891	FEM
NONHSAG106303.1	0.319905	[0.10617597; 0.53363493]	0.00334965	0	0.563894	FEM
NONHSAG104357.1	0.321569	[0.10667816; 0.53646073]	0.00335704	0.323234	0.131968	FEM
NONHSAG047243.2	0.319206	[0.10588643; 0.53252517]	0.00335817	0	0.745799	FEM
NONHSAG015887.2	0.318848	[0.10566668; 0.53203001]	0.00337326	0	0.913288	FEM
NONHSAG081454.1	0.319764	[0.10579215; 0.53373637]	0.00339985	0	0.505816	FEM
NONHSAG098347.1	0.318554	[0.10527126; 0.53183695]	0.00341799	0	0.850253	FEM
NONHSAG112110.1	0.321117	[0.10605673; 0.53617723]	0.0034272	0.464792	0.038312	FEM
NONHSAG015459.2	0.320885	[0.10597914; 0.53579133]	0.00342736	0.329976	0.126331	FEM
NONHSAG072927.1	-0.319426	[-0.53336822; -0.10548374]	0.00342939	0.0833081	0.363668	FEM
NONHSAG072571.1	0.319588	[0.10543241; 0.53374313]	0.0034452	0.177965	0.269128	FEM
NONHSAG115049.1	0.319509	[0.10537033; 0.53364782]	0.00345067	0.0186657	0.425905	FEM
NONHSAG012302.3	0.319068	[0.10521090; 0.53292533]	0.00345279	0	0.528793	FEM
NONHSAG031167.3	-0.320983	[-0.53616508; -0.10580189]	0.00345892	0.548396	0.0113069	FEM
NONHSAG070805.1	0.318731	[0.10496948; 0.53249331]	0.00347263	0	0.747615	FEM
NONHSAG043451.2	0.319323	[0.10512890; 0.53351728]	0.00347803	0.0859158	0.3611	FEM
NONHSAG084422.1	0.318642	[0.10490389; 0.53238056]	0.00347816	0	0.502011	FEM
NONHSAG038151.2	0.318739	[0.10484387; 0.53263367]	0.00349219	0.105586	0.341625	FEM
NONHSAG025537.3	0.318604	[0.10474783; 0.53246053]	0.00350012	0.0600702	0.386377	FEM
NONHSAG050565.2	0.318745	[0.10472264; 0.53276739]	0.00351109	0.126731	0.320524	FEM
NONHSAG050302.2	0.318401	[0.10458153; 0.53222015]	0.00351541	0	0.501821	FEM
NONHSAG074617.1	0.318488	[0.10459697; 0.53237880]	0.00351743	0	0.530432	FEM
NONHSAG002680.2	0.319648	[0.10494453; 0.53435054]	0.00352254	0.304644	0.147975	FEM
NONHSAG063442.1	0.320055	[0.10506948; 0.53504108]	0.00352391	0.457304	0.0417827	FEM
NONHSAG027432.2	0.319751	[0.10495093; 0.53455092]	0.00352677	0.246659	0.201471	FEM
NONHSAG013261.3	0.317651	[0.10424168; 0.53106042]	0.00352986	0	0.848352	FEM
NONHSAG028553.2	0.320116	[0.10504946; 0.53518245]	0.00353003	0.431595	0.0550536	FEM
NONHSAG051463.2	0.321024	[0.10528525; 0.53676212]	0.00353955	0.50139	0.0239023	FEM
NONHSAG035548.2	0.320129	[0.10494171; 0.53531675]	0.00354728	0.4697	0.0361338	FEM
NONHSAG064544.1	0.318276	[0.10433259; 0.53221936]	0.00354752	0.0762689	0.370581	FEM
NONHSAG098361.1	0.317685	[0.10407886; 0.53129181]	0.00355687	0	0.637373	FEM
NONHSAG038374.2	0.317258	[0.10387431; 0.53064170]	0.00356693	0	0.748802	FEM
NONHSAG114090.1	0.316717	[0.10358548; 0.52984909]	0.00358443	0	0.929237	FEM
NONHSAG028243.2	-0.969626	[-1.62220071; -0.31705206]	0.00358821	0.800922	6.96108e-08	REM
NONHSAG101718.1	0.318413	[0.10401086; 0.53281574]	0.00360465	0.146259	0.300943	FEM
NONHSAG052678.2	0.318607	[0.10396084; 0.53325222]	0.00362239	0.283595	0.166838	FEM
NONHSAG053134.2	0.319369	[0.10412019; 0.53461741]	0.00363641	0.500078	0.0243466	FEM
NONHSAG076362.1	0.318384	[0.10378386; 0.53298410]	0.00363881	0.380076	0.0877112	FEM
NONHSAG100808.1	0.318312	[0.10374480; 0.53288012]	0.0036413	0.186112	0.260978	FEM
NONHSAG106486.1	0.316547	[0.10313832; 0.52995659]	0.00364625	0	0.828509	FEM
NONHSAG064572.1	0.317888	[0.10357492; 0.53220013]	0.00364626	0.20568	0.241501	FEM
NONHSAG055471.2	0.318524	[0.10376564; 0.53328147]	0.00364887	0.327515	0.128378	FEM
NONHSAG093506.2	0.31816	[0.10357139; 0.53274932]	0.00366088	0.231347	0.216273	FEM
NONHSAG002304.3	0.317046	[0.10314608; 0.53094610]	0.00367084	0	0.488975	FEM
NONHSAG027271.2	0.318009	[0.10340847; 0.53260861]	0.0036789	0.288994	0.161932	FEM
NONHSAG101939.1	0.31623	[0.10266656; 0.52979271]	0.00370511	0	0.761144	FEM
NONHSAG062696.1	0.318274	[0.10325807; 0.53329056]	0.00371667	0.436341	0.0524471	FEM
NONHSAG063623.1	0.317636	[0.10299555; 0.53227636]	0.00372557	0.244625	0.203425	FEM
NONHSAG007456.2	0.316605	[0.10263681; 0.53057311]	0.00372951	0.0283254	0.416803	FEM
NONHSAG057229.2	0.316586	[0.10260817; 0.53056380]	0.00373314	0.0549164	0.391366	FEM
NONHSAG107490.1	0.316958	[0.10272613; 0.53118979]	0.00373356	0.205846	0.241336	FEM
NONHSAG103482.1	0.316024	[0.10239990; 0.52964898]	0.00373738	0	0.466374	FEM
NONHSAG035012.2	0.315764	[0.10228066; 0.52924708]	0.00374303	0	0.755722	FEM
NONHSAG079021.2	0.315229	[0.10210469; 0.52835320]	0.00374346	0	0.966872	FEM
NONHSAG036936.2	0.315714	[0.10207822; 0.52934980]	0.00377332	0	0.652869	FEM
NONHSAG107064.1	0.317315	[0.10253500; 0.53209576]	0.00378322	0.443476	0.0486615	FEM
NONHSAG058467.1	0.316461	[0.10225551; 0.53066586]	0.00378376	0.0321464	0.413182	FEM
NONHSAG040285.2	0.315378	[0.10185448; 0.52890088]	0.00379212	0	0.820763	FEM
NONHSAG105432.1	0.316856	[0.10229641; 0.53141481]	0.00379789	0.227277	0.220242	FEM
NONHSAG061817.1	0.316017	[0.10202210; 0.53001245]	0.00379849	0.133099	0.314145	FEM
NONHSAG071011.1	0.31504	[0.10164473; 0.52843499]	0.00380864	0	0.855718	FEM
NONHSAG108468.1	0.31588	[0.10185131; 0.52990900]	0.00381924	0.0684651	0.378211	FEM
NONHSAG061474.1	0.314895	[0.10150327; 0.52828584]	0.00382423	0	0.682477	FEM
NONHSAG091204.1	0.314252	[0.10119444; 0.52730879]	0.00384105	0	0.946799	FEM
NONHSAG022224.2	0.315921	[0.10173211; 0.53011073]	0.00384106	0.20804	0.239164	FEM
NONHSAG088535.1	0.315771	[0.10164284; 0.52989879]	0.00384779	0.0818101	0.365141	FEM
NONHSAG094485.1	0.31499	[0.10130097; 0.52867986]	0.00386283	0	0.456809	FEM
NONHSAG005552.2	0.315066	[0.10129212; 0.52883893]	0.00386831	0.128076	0.319178	FEM
NONHSAG095440.1	0.317206	[0.10192302; 0.53248823]	0.00387775	0.445832	0.0474467	FEM
NONHSAG028135.2	0.315542	[0.10132608; 0.52975721]	0.00388811	0.197048	0.250072	FEM
NONHSAG100161.1	0.314536	[0.10099974; 0.52807313]	0.00388871	0	0.619778	FEM
NONHSAG061769.1	0.314866	[0.10110455; 0.52862661]	0.00388885	0	0.529325	FEM
NONHSAG063848.1	0.317146	[0.10166978; 0.53262198]	0.0039166	0.456547	0.0421438	FEM
NONHSAG039220.3	0.3143	[0.10070270; 0.52789769]	0.00392582	0	0.677974	FEM
NONHSAG001700.2	-0.31483	[-0.52884026; -0.10081931]	0.00393474	0.177087	0.270008	FEM
NONHSAG097792.1	0.313398	[0.10028765; 0.52650806]	0.00394712	0	0.949335	FEM
NONHSAG053384.2	0.314193	[0.10047254; 0.52791312]	0.00395888	0	0.549358	FEM
NONHSAG060893.1	0.31344	[0.10022280; 0.52665776]	0.00396042	0	0.856803	FEM
NONHSAG002185.2	0.314081	[0.10036699; 0.52779559]	0.00397073	0	0.5588	FEM
NONHSAG098027.1	0.314865	[0.10054521; 0.52918438]	0.00398296	0.350468	0.109805	FEM
NONHSAG045381.2	0.31641	[0.10098852; 0.53183096]	0.00399142	0.544924	0.0120282	FEM
NONHSAG083000.1	0.315006	[0.10049735; 0.52951384]	0.00399873	0.226237	0.221258	FEM
NONHSAG038350.2	0.314606	[0.10034899; 0.52886295]	0.00400228	0.205996	0.241188	FEM
NONHSAG102815.1	0.313232	[0.09985408; 0.52660903]	0.00401196	0	0.839752	FEM
NONHSAG080021.1	0.314193	[0.10014560; 0.52823948]	0.0040145	0	0.456971	FEM
NONHSAG049666.2	0.315709	[0.10058195; 0.53083563]	0.00402249	0.411432	0.0669011	FEM
NONHSAG107578.1	0.313579	[0.09979780; 0.52736039]	0.00404065	0.00870633	0.435205	FEM
NONHSAG038419.2	0.314086	[0.09994620; 0.52822520]	0.00404285	0.031663	0.413641	FEM
NONHSAG044421.2	0.313251	[0.09961861; 0.52688352]	0.00405355	0	0.600593	FEM
NONHSAG085070.1	0.313823	[0.09977710; 0.52786836]	0.00405756	0.206634	0.240555	FEM
NONHSAG018320.2	0.311945	[0.09911315; 0.52477736]	0.0040692	0	0.962956	FEM
NONHSAG005031.2	0.313543	[0.09958621; 0.52749964]	0.00407518	0	0.552677	FEM
NONHSAG062280.1	0.313714	[0.09956078; 0.52786682]	0.00408899	0.248586	0.199624	FEM
NONHSAG060006.1	0.313091	[0.09932798; 0.52685355]	0.00409509	0	0.611052	FEM
NONHSAG080752.1	0.313497	[0.09924958; 0.52774381]	0.00413119	0.0934109	0.353701	FEM
NONHSAG069357.1	0.314354	[0.09951800; 0.52918927]	0.0041317	0.329836	0.126448	FEM
NONHSAG055174.2	-0.314715	[-0.52988794; -0.09954240]	0.0041474	0.473897	0.0343321	FEM
NONHSAG096186.1	0.312068	[0.09869963; 0.52543654]	0.00414837	0	0.787209	FEM
NONHSAG109185.1	0.315247	[0.09956880; 0.53092565]	0.00417218	0.469696	0.0361354	FEM
NONHSAG056820.2	0.313828	[0.09907282; 0.52858287]	0.00418056	0.218855	0.228495	FEM
NONHSAG088331.1	0.311392	[0.09829087; 0.52449397]	0.00418289	0	0.866876	FEM
NONHSAG005506.2	-0.313159	[-0.52759478; -0.09872403]	0.00420492	0.267337	0.181869	FEM
NONHSAG002014.2	0.311867	[0.09831129; 0.52542183]	0.00420584	0	0.706639	FEM
NONHSAG082151.1	0.312253	[0.09837879; 0.52612798]	0.00421551	0.126011	0.321245	FEM
NONHSAG045616.2	-0.312726	[-0.52708587; -0.09836703]	0.00424415	0.125491	0.321766	FEM
NONHSAG045988.2	-0.312726	[-0.52708587; -0.09836703]	0.00424415	0.125491	0.321766	FEM
NONHSAG046318.2	-0.312726	[-0.52708587; -0.09836703]	0.00424415	0.125491	0.321766	FEM
NONHSAG046682.2	-0.312726	[-0.52708587; -0.09836703]	0.00424415	0.125491	0.321766	FEM
NONHSAG057931.1	0.312362	[0.09824028; 0.52648371]	0.00424631	0.123892	0.323365	FEM
NONHSAG027323.3	0.313661	[0.09860375; 0.52871780]	0.00425433	0.418574	0.062563	FEM
NONHSAG090357.2	0.313469	[0.09851397; 0.52842322]	0.00425957	0.388219	0.0820388	FEM
NONHSAG013822.2	0.31277	[0.09823282; 0.52730726]	0.00427061	0.262504	0.186406	FEM
NONHSAG089375.1	0.311664	[0.09786938; 0.52545909]	0.00427351	0	0.566914	FEM
NONHSAG046713.3	0.312882	[0.09824175; 0.52752141]	0.00427528	0.332439	0.124296	FEM
NONHSAG054832.2	-0.310977	[-0.52435353; -0.09759962]	0.00428322	0	0.702011	FEM
NONHSAG107006.1	0.312474	[0.09806746; 0.52688118]	0.00428362	0.230927	0.216682	FEM
NONHSAG063868.1	0.312178	[0.09796883; 0.52638639]	0.00428461	0.217672	0.229658	FEM
NONHSAG062410.1	0.312637	[0.09810703; 0.52716679]	0.00428568	0.272397	0.177153	FEM
NONHSAG015197.2	0.312971	[0.09820606; 0.52773556]	0.00428671	0.292664	0.158623	FEM
NONHSAG030335.2	0.311919	[0.09787398; 0.52596403]	0.00428708	0	0.463185	FEM
NONHSAG084599.1	0.311243	[0.09766013; 0.52482562]	0.00428739	0	0.608398	FEM
NONHSAG099982.1	0.311621	[0.09768423; 0.52555811]	0.00430447	0.243167	0.204827	FEM
NONHSAG053081.2	0.313081	[0.09811699; 0.52804519]	0.00430895	0.342449	0.116159	FEM
NONHSAG002678.2	0.313465	[0.09820001; 0.52872933]	0.00431565	0.449874	0.0454037	FEM
NONHSAG079526.1	0.311096	[0.09739593; 0.52479670]	0.00432694	0	0.457559	FEM
NONHSAG105150.1	0.310876	[0.09732161; 0.52442980]	0.00432789	0	0.825303	FEM
NONHSAG044603.2	0.31271	[0.09788665; 0.52753345]	0.00432956	0.403476	0.0719133	FEM
NONHSAG051470.2	0.31127	[0.09742271; 0.52511688]	0.00433194	0	0.588646	FEM
NONHSAG028242.2	-1.07457	[-1.81296316; -0.33618602]	0.00433929	0.838515	2.78005e-10	REM
NONHSAG077972.1	0.312445	[0.09767763; 0.52721269]	0.00435244	0.329147	0.127019	FEM
NONHSAG057571.1	0.311562	[0.09739201; 0.52573185]	0.00435417	0.165471	0.281655	FEM
NONHSAG072091.1	0.312328	[0.09761572; 0.52703989]	0.00435703	0.326652	0.129099	FEM
NONHSAG058362.1	0.313182	[0.09787660; 0.52848716]	0.00435813	0.515459	0.019466	FEM
NONHSAG075916.1	0.311198	[0.09725331; 0.52514292]	0.00435873	0	0.544629	FEM
NONHSAG019903.2	0.310569	[0.09705326; 0.52408550]	0.00435938	0	0.703469	FEM
NONHSAG020307.2	0.312055	[0.09751569; 0.52659524]	0.00435974	0.290165	0.160874	FEM
NONHSAG099284.1	0.311283	[0.09721083; 0.52535602]	0.00437137	0.15051	0.296676	FEM
NONHSAG105892.1	0.310624	[0.09695836; 0.52428996]	0.00437992	0	0.637897	FEM
NONHSAG077134.1	0.309661	[0.09658786; 0.52273476]	0.00439282	0	0.750876	FEM
NONHSAG115036.1	0.311532	[0.09717029; 0.52589452]	0.00439303	0.171516	0.27559	FEM
NONHSAG031302.2	0.313246	[0.09769522; 0.52879595]	0.00439475	0.521762	0.0176687	FEM
NONHSAG010442.2	0.310366	[0.09674086; 0.52399123]	0.00440513	0	0.606287	FEM
NONHSAG087115.1	0.309974	[0.09656755; 0.52337955]	0.00441455	0	0.810827	FEM
NONHSAG096479.1	0.309021	[0.09624057; 0.52180154]	0.00442017	0	0.990057	FEM
NONHSAG051467.2	0.311355	[0.09686302; 0.52584637]	0.00443943	0.143592	0.303621	FEM
NONHSAG073493.1	-0.310843	[-0.52499350; -0.09669266]	0.0044415	0.238984	0.208863	FEM
NONHSAG044734.2	0.310268	[0.09649835; 0.52403777]	0.00444437	0	0.564762	FEM
NONHSAG029935.2	0.310162	[0.09641397; 0.52390985]	0.00445392	0	0.612772	FEM
NONHSAG026170.2	0.310439	[0.09647465; 0.52440246]	0.00445862	0.0662042	0.380415	FEM
NONHSAG041416.2	0.310493	[0.09645610; 0.52453016]	0.00446523	0.242613	0.205361	FEM
NONHSAG084525.1	0.310342	[0.09633309; 0.52435111]	0.00447941	0	0.479076	FEM
NONHSAG106332.1	0.310259	[0.09630154; 0.52421595]	0.00448047	0	0.546854	FEM
NONHSAG062715.2	0.311288	[0.09660294; 0.52597253]	0.00448382	0.309341	0.143869	FEM
NONHSAG085506.1	-0.309206	[-0.52256151; -0.09585010]	0.00450386	0	0.869653	FEM
NONHSAG085158.1	0.309721	[0.09599273; 0.52344857]	0.00450704	0	0.5393	FEM
NONHSAG012538.3	0.310049	[0.09608714; 0.52401161]	0.00450844	0	0.590756	FEM
NONHSAG002414.2	0.309341	[0.09580025; 0.52288215]	0.00452114	0	0.671504	FEM
NONHSAG004922.2	0.308521	[0.09554478; 0.52149726]	0.00452141	0	0.977654	FEM
NONHSAG002324.2	-0.310387	[-0.52469266; -0.09608167]	0.00452912	0.331108	0.125395	FEM
NONHSAG064927.1	0.310054	[0.09594739; 0.52416145]	0.00453501	0.151632	0.295548	FEM
NONHSAG060708.2	0.310177	[0.09589351; 0.52446008]	0.00455231	0.0994087	0.34776	FEM
NONHSAG097401.1	0.310047	[0.09579696; 0.52429646]	0.00456296	0.271691	0.177808	FEM
NONHSAG047712.2	0.309309	[0.09552818; 0.52309025]	0.00457072	0	0.457678	FEM
NONHSAG020543.2	-0.311143	[-0.52619327; -0.09609279]	0.00457105	0.512119	0.0204653	FEM
NONHSAG043047.3	0.311722	[0.09626159; 0.52718168]	0.00457291	0.476202	0.0333663	FEM
NONHSAG096765.1	0.309289	[0.09549544; 0.52308225]	0.00457574	0	0.546336	FEM
NONHSAG052284.2	0.310764	[0.09587499; 0.52565315]	0.00459011	0.420896	0.061186	FEM
NONHSAG016810.2	0.309929	[0.09560864; 0.52424932]	0.00459177	0.18097	0.26612	FEM
NONHSAG066945.1	0.308843	[0.09511936; 0.52256711]	0.00462127	0	0.550228	FEM
NONHSAG061065.1	0.309279	[0.09519663; 0.52336125]	0.00463217	0.158847	0.288304	FEM
NONHSAG031293.2	0.308915	[0.09503812; 0.52279112]	0.00464107	0.0114687	0.432635	FEM
NONHSAG034480.2	0.30962	[0.09514234; 0.52409827]	0.00466273	0.366577	0.0975072	FEM
NONHSAG111309.1	0.308528	[0.09478766; 0.52226767]	0.00466638	0	0.67733	FEM
NONHSAG112416.1	-0.310506	[-0.52566051; -0.09535171]	0.00467479	0.48045	0.0316306	FEM
NONHSAG041233.2	0.307403	[0.09434731; 0.52045949]	0.0046848	0	0.958848	FEM
NONHSAG089907.1	0.309305	[0.09488894; 0.52372039]	0.0046929	0.204508	0.242662	FEM
NONHSAG107613.1	0.308084	[0.09446042; 0.52170682]	0.00470337	0	0.665587	FEM
NONHSAG076093.1	0.309703	[0.09494899; 0.52445677]	0.0047049	0.404944	0.0709747	FEM
NONHSAG038249.3	0.310384	[0.09515562; 0.52561247]	0.00470532	0.53166	0.0150771	FEM
NONHSAG051811.3	0.309774	[0.09492859; 0.52461994]	0.00471307	0.28804	0.162796	FEM
NONHSAG087280.1	0.30841	[0.09449248; 0.52232834]	0.00471661	0.0404814	0.405242	FEM
NONHSAG057749.1	0.307819	[0.09425835; 0.52137880]	0.0047269	0	0.480724	FEM
NONHSAG107195.1	0.311108	[0.09523416; 0.52698230]	0.00473299	0.530656	0.0153273	FEM
NONHSAG105880.1	0.309224	[0.09460065; 0.52384796]	0.00474405	0.324466	0.130931	FEM
NONHSAG028141.2	0.309369	[0.09463255; 0.52410575]	0.00474647	0.33256	0.124197	FEM
NONHSAG114412.1	0.30827	[0.09429066; 0.52225026]	0.0047476	0.141428	0.305793	FEM
NONHSAG056668.1	0.310271	[0.09487365; 0.52566925]	0.00475325	0.45143	0.044631	FEM
NONHSAG039204.2	0.306467	[0.09369838; 0.51923574]	0.0047556	0	0.995662	FEM
NONHSAG071280.1	0.308708	[0.09435040; 0.52306495]	0.00476206	0.2646	0.184435	FEM
NONHSAG098826.2	0.308921	[0.09432261; 0.52351990]	0.00478027	0.329312	0.126882	FEM
NONHSAG111412.1	-0.759067	[-1.28684950; -0.23128362]	0.00481876	0.712459	7.08365e-05	REM
NONHSAG011144.3	0.309496	[0.09424826; 0.52474436]	0.00482932	0.493676	0.0265906	FEM
NONHSAG067161.1	0.307912	[0.09371349; 0.52211141]	0.00483971	0.152492	0.294685	FEM
NONHSAG105252.1	0.307421	[0.09355109; 0.52129071]	0.00484225	0	0.481634	FEM
NONHSAG074305.1	0.308285	[0.09379574; 0.52277520]	0.00484591	0.383651	0.0851988	FEM
NONHSAG096105.1	0.30867	[0.09390822; 0.52343241]	0.00484682	0.361188	0.101549	FEM
NONHSAG016280.3	0.307184	[0.09336580; 0.52100229]	0.00486479	0	0.575254	FEM
NONHSAG072798.1	0.306173	[0.09301354; 0.51933292]	0.00487381	0	0.885401	FEM
NONHSAG105419.1	0.308249	[0.09364376; 0.52285336]	0.00487386	0.406297	0.0701151	FEM
NONHSAG085065.1	0.306861	[0.09320698; 0.52051455]	0.00487689	0	0.49488	FEM
NONHSAG035731.2	0.307504	[0.09334068; 0.52166644]	0.00488918	0.217212	0.230111	FEM
NONHSAG057280.2	0.306344	[0.09292981; 0.51975803]	0.004901	0	0.786929	FEM
NONHSAG109220.1	0.30738	[0.09320464; 0.52155597]	0.00490893	0.104827	0.34238	FEM
NONHSAG066257.1	0.307267	[0.09313399; 0.52140047]	0.00491623	0	0.460936	FEM
NONHSAG051778.2	0.307341	[0.09311500; 0.52156791]	0.00492456	0.215829	0.231473	FEM
NONHSAG016540.3	0.307595	[0.09316254; 0.52202734]	0.00493044	0.309228	0.143968	FEM
NONHSAG082443.1	-0.308269	[-0.52317067; -0.09336648]	0.00493046	0.434394	0.0535083	FEM
NONHSAG058212.1	0.307148	[0.09291071; 0.52138550]	0.00495392	0.31744	0.136886	FEM
NONHSAG035336.2	0.306193	[0.09254878; 0.51983816]	0.00496875	0	0.608055	FEM
NONHSAG114828.1	0.30611	[0.09246231; 0.51975815]	0.00498121	0	0.501297	FEM
NONHSAG084344.1	0.305941	[0.09240923; 0.51947324]	0.00498162	0	0.632706	FEM
NONHSAG094105.1	0.306607	[0.09256945; 0.52064379]	0.0049899	0	0.505197	FEM
NONHSAG083259.1	0.305033	[0.09205210; 0.51801397]	0.00499854	0	0.951797	FEM
NONHSAG030962.2	0.308254	[0.09301981; 0.52348786]	0.0049994	0.458188	0.041364	FEM
NONHSAG034929.3	0.3055	[0.09207932; 0.51892151]	0.00502182	0	0.845569	FEM
NONHSAG107431.1	0.306399	[0.09234862; 0.52045024]	0.00502216	0.200143	0.246995	FEM
NONHSAG111229.1	0.307558	[0.09265323; 0.52246205]	0.00503121	0.390361	0.0805777	FEM
NONHSAG104622.1	0.306772	[0.09239887; 0.52114516]	0.00503483	0.1611	0.286042	FEM
NONHSAG047975.2	0.306224	[0.09222764; 0.52022060]	0.0050361	0	0.458549	FEM
NONHSAG059686.1	0.305914	[0.09211222; 0.51971585]	0.00504061	0.0668146	0.37982	FEM
NONHSAG108872.1	0.305273	[0.09186687; 0.51867830]	0.00505135	0	0.842582	FEM
NONHSAG112090.1	0.304404	[0.09153217; 0.51727570]	0.0050665	0	0.956389	FEM
NONHSAG004370.2	0.306533	[0.09216803; 0.52089888]	0.00506741	0.186463	0.260627	FEM
NONHSAG074815.1	0.307456	[0.09243411; 0.52247814]	0.00506974	0.390885	0.0802219	FEM
NONHSAG076774.1	0.304502	[0.09152530; 0.51747932]	0.00507404	0	0.980963	FEM
NONHSAG013871.3	0.306152	[0.09199336; 0.52031146]	0.00507979	0.193598	0.253508	FEM
NONHSAG110063.1	0.307605	[0.09240940; 0.52280139]	0.005084	0.440507	0.0502172	FEM
NONHSAG062821.1	0.304743	[0.09146692; 0.51801885]	0.00510111	0	0.856441	FEM
NONHSAG018065.2	0.305975	[0.09183430; 0.52011649]	0.00510164	0.0666727	0.379958	FEM
NONHSAG050541.2	0.305718	[0.09175548; 0.51968033]	0.00510196	0.0446238	0.401276	FEM
NONHSAG096585.1	0.305114	[0.09157033; 0.51865752]	0.00510276	0	0.579156	FEM
NONHSAG115113.1	0.307577	[0.09226331; 0.52288969]	0.00511225	0.426575	0.0578872	FEM
NONHSAG092762.1	0.304515	[0.09131475; 0.51771485]	0.00511852	0	0.833578	FEM
NONHSAG104077.2	0.305845	[0.09169006; 0.51999991]	0.00512341	0.106954	0.340265	FEM
NONHSAG014951.2	0.305643	[0.09161338; 0.51967297]	0.00512677	0.0335445	0.411854	FEM
NONHSAG114071.1	0.304343	[0.09116155; 0.51752399]	0.00513971	0	0.929412	FEM
NONHSAG053266.2	0.306056	[0.09154336; 0.52056875]	0.00516705	0.18797	0.259122	FEM
NONHSAG073794.1	0.305341	[0.09132444; 0.51935691]	0.00516808	0.137843	0.309389	FEM
NONHSAG067557.1	0.3053	[0.09125358; 0.51934687]	0.00518037	0.139127	0.308101	FEM
NONHSAG042533.3	0.305886	[0.09141929; 0.52035306]	0.00518234	0.179825	0.267265	FEM
NONHSAG056815.1	0.305362	[0.09122107; 0.51950380]	0.00519108	0.230593	0.217008	FEM
NONHSAG089879.2	0.305599	[0.09118428; 0.52001435]	0.00521363	0.295566	0.156022	FEM
NONHSAG073664.1	0.304843	[0.09094221; 0.51874387]	0.00521709	0	0.539483	FEM
NONHSAG037420.2	0.304684	[0.09083947; 0.51852898]	0.00522877	0	0.527137	FEM
NONHSAG012843.3	0.304999	[0.09092311; 0.51907413]	0.00523089	0	0.455987	FEM
NONHSAG008175.2	0.304497	[0.09067810; 0.51831545]	0.00525107	0.00691795	0.436866	FEM
NONHSAG062445.1	0.30366	[0.09039187; 0.51692903]	0.00525897	0	0.869273	FEM
NONHSAG103385.1	0.305944	[0.09106372; 0.52082335]	0.00526061	0.409163	0.0683115	FEM
NONHSAG035529.2	0.304685	[0.09067542; 0.51869374]	0.00526349	0.167279	0.27984	FEM
NONHSAG087662.1	0.306645	[0.09119130; 0.52209833]	0.00527772	0.53487	0.0142955	FEM
NONHSAG030121.2	0.303783	[0.09031627; 0.51724974]	0.00528283	0	0.833774	FEM
NONHSAG104620.1	0.306099	[0.09096224; 0.52123534]	0.00529183	0.464529	0.0384306	FEM
NONHSAG071424.1	-0.30372	[-0.51726554; -0.09017409]	0.00530918	0	0.449896	FEM
NONHSAG045698.2	-0.303957	[-0.51769987; -0.09021509]	0.0053155	0.130711	0.316538	FEM
NONHSAG046071.2	-0.303957	[-0.51769987; -0.09021509]	0.0053155	0.130711	0.316538	FEM
NONHSAG046225.2	-0.303957	[-0.51769987; -0.09021509]	0.0053155	0.130711	0.316538	FEM
NONHSAG046406.2	-0.303957	[-0.51769987; -0.09021509]	0.0053155	0.130711	0.316538	FEM
NONHSAG033183.2	0.303595	[0.09010290; 0.51708693]	0.00531648	0	0.654332	FEM
NONHSAG081911.1	0.305221	[0.09053242; 0.51990893]	0.00532778	0.378643	0.0887282	FEM
NONHSAG087585.1	0.304565	[0.09030499; 0.51882402]	0.0053348	0.356443	0.105169	FEM
NONHSAG042746.2	0.303987	[0.09010640; 0.51786835]	0.00534069	0	0.4671	FEM
NONHSAG015073.2	0.304607	[0.09028905; 0.51892517]	0.00534091	0.200866	0.246277	FEM
NONHSAG050344.2	0.304654	[0.09029230; 0.51901501]	0.00534317	0.279889	0.170232	FEM
NONHSAG114153.1	0.303456	[0.08989028; 0.51702213]	0.00535331	0	0.712928	FEM
NONHSAG002490.2	0.305474	[0.09043925; 0.52050896]	0.00536375	0.413721	0.0654941	FEM
NONHSAG065999.1	0.303262	[0.08975689; 0.51676640]	0.00536965	0	0.532271	FEM
NONHSAG059375.1	0.304227	[0.09003101; 0.51842359]	0.00537216	0.0478123	0.398214	FEM
NONHSAG060506.1	0.303914	[0.08988624; 0.51794114]	0.00538336	0.115866	0.331384	FEM
NONHSAG093983.1	0.304915	[0.09011285; 0.51971658]	0.00539832	0.422243	0.0603946	FEM
NONHSAG083885.1	-0.304118	[-0.51843752; -0.08979856]	0.00541537	0.312517	0.141116	FEM
NONHSAG012143.2	0.304533	[0.08990635; 0.51916017]	0.00541857	0.346307	0.113083	FEM
NONHSAG074135.1	0.303064	[0.08943405; 0.51669403]	0.00542695	0	0.546815	FEM
NONHSAG097985.1	0.305407	[0.09009186; 0.52072313]	0.00543424	0.431794	0.0549431	FEM
NONHSAG035503.2	0.303673	[0.08957032; 0.51777661]	0.00543642	0.0962309	0.35091	FEM
NONHSAG100573.1	0.302347	[0.08917450; 0.51551924]	0.00543741	0	0.808132	FEM
NONHSAG115167.1	0.303755	[0.08953465; 0.51797470]	0.00544938	0.271402	0.178078	FEM
NONHSAG010146.3	-0.303069	[-0.51683849; -0.08929979]	0.00545654	0.0706387	0.376089	FEM
NONHSAG102778.1	0.302531	[0.08913916; 0.51592238]	0.00545698	0	0.781175	FEM
NONHSAG004452.2	0.30324	[0.08933138; 0.51714884]	0.00546064	0	0.515197	FEM
NONHSAG066944.1	0.301935	[0.08893130; 0.51493963]	0.0054641	0	0.971639	FEM
NONHSAG110902.1	0.303323	[0.08933737; 0.51730953]	0.00546469	0.0714733	0.375274	FEM
NONHSAG037834.2	-0.304539	[-0.51951125; -0.08956675]	0.00549272	0.461912	0.0396259	FEM
NONHSAG097168.1	0.303172	[0.08914793; 0.51719665]	0.00549642	0.0500737	0.396038	FEM
NONHSAG020426.2	0.302186	[0.08882473; 0.51554795]	0.00550375	0	0.625489	FEM
NONHSAG114528.1	0.303353	[0.08913816; 0.51756836]	0.00551024	0.174253	0.272847	FEM
NONHSAG072801.1	0.302951	[0.08898114; 0.51692100]	0.00551878	0	0.484795	FEM
NONHSAG063273.1	0.305084	[0.08953666; 0.52063098]	0.00553429	0.527675	0.0160871	FEM
NONHSAG068085.1	0.301492	[0.08842568; 0.51455903]	0.00554692	0	0.887365	FEM
NONHSAG109521.1	0.303304	[0.08889564; 0.51771243]	0.00556047	0.204436	0.242734	FEM
NONHSAG067289.1	0.302323	[0.08860585; 0.51604043]	0.00556098	0	0.592469	FEM
NONHSAG021545.2	0.304799	[0.08922948; 0.52036809]	0.00558342	0.544106	0.0122026	FEM
NONHSAG084082.1	0.301814	[0.08827767; 0.51534938]	0.00560078	0	0.786646	FEM
NONHSAG062351.2	0.301948	[0.08827040; 0.51562528]	0.00561117	0	0.647636	FEM
NONHSAG064710.1	0.304569	[0.08900148; 0.52013716]	0.00561898	0.523872	0.017093	FEM
NONHSAG047101.2	0.303482	[0.08866529; 0.51829800]	0.00562306	0.488228	0.0286001	FEM
NONHSAG025601.2	0.30315	[0.08855871; 0.51774039]	0.00562519	0.399853	0.074257	FEM
NONHSAG098845.1	0.302024	[0.08818881; 0.51585934]	0.00563439	0.000187979	0.44309	FEM
NONHSAG085041.1	0.303734	[0.08867858; 0.51878987]	0.00563652	0.358966	0.103238	FEM
NONHSAG017781.2	0.301196	[0.08793197; 0.51446052]	0.00563778	0	0.729973	FEM
NONHSAG082484.1	0.302488	[0.08827147; 0.51670416]	0.00564618	0.170417	0.276693	FEM
NONHSAG087712.1	0.303447	[0.08854649; 0.51834657]	0.00564725	0.347812	0.111893	FEM
NONHSAG096262.1	0.30138	[0.08791246; 0.51484673]	0.00565419	0	0.790939	FEM
NONHSAG047418.2	0.301402	[0.08791665; 0.51488796]	0.00565474	0	0.738882	FEM
NONHSAG110244.1	-0.865934	[-1.47930920; -0.25255889]	0.00565686	0.79127	2.03571e-07	REM
NONHSAG114752.1	0.304092	[0.08868312; 0.51950020]	0.00565875	0.49406	0.0264523	FEM
NONHSAG077313.1	0.301184	[0.08782272; 0.51454587]	0.00566156	0	0.696341	FEM
NONHSAG065218.1	0.301585	[0.08792192; 0.51524827]	0.00566554	0.0568507	0.389496	FEM
NONHSAG044962.3	0.300366	[0.08751689; 0.51321448]	0.00567674	0	0.987366	FEM
NONHSAG065704.1	0.30335	[0.08837083; 0.51832963]	0.00568024	0.406911	0.0697263	FEM
NONHSAG101358.1	0.303566	[0.08841400; 0.51871863]	0.00568467	0.504695	0.0228064	FEM
NONHSAG111909.1	0.301858	[0.08790976; 0.51580643]	0.00568619	0.0680561	0.37861	FEM
NONHSAG094444.1	0.301887	[0.08785093; 0.51592212]	0.00570132	0	0.513983	FEM
NONHSAG014685.2	-0.302922	[-0.51779786; -0.08804676]	0.00572511	0.497939	0.0250824	FEM
NONHSAG054186.2	0.302521	[0.08791157; 0.51713121]	0.00572932	0.336593	0.120892	FEM
NONHSAG024532.2	0.300474	[0.08730215; 0.51364568]	0.00573261	0	0.87246	FEM
NONHSAG078988.2	0.303759	[0.08822703; 0.51929132]	0.00573928	0.519082	0.0184186	FEM
NONHSAG060706.1	0.301846	[0.08763790; 0.51605461]	0.00574689	0.184053	0.263036	FEM
NONHSAG016293.2	0.30302	[0.08793918; 0.51809997]	0.00575579	0.456664	0.042088	FEM
NONHSAG029959.2	0.299911	[0.08693767; 0.51288519]	0.00577857	0	0.861866	FEM
NONHSAG024469.2	-0.302081	[-0.51661292; -0.08754990]	0.0057824	0.320463	0.134311	FEM
NONHSAG006808.2	0.300872	[0.08713677; 0.51460761]	0.00579674	0	0.511452	FEM
NONHSAG029980.2	0.302253	[0.08752062; 0.51698441]	0.00580036	0.322355	0.13271	FEM
NONHSAG101350.1	0.300701	[0.08706406; 0.51433751]	0.00580202	0	0.522708	FEM
NONHSAG064874.1	0.301496	[0.08728942; 0.51570183]	0.00580311	0.0611394	0.385339	FEM
NONHSAG067882.1	0.301193	[0.08718511; 0.51519998]	0.00580691	0.00313928	0.440366	FEM
NONHSAG057661.1	0.300153	[0.08682199; 0.51348498]	0.00582125	0	0.701372	FEM
NONHSAG107443.1	0.299648	[0.08667305; 0.51262381]	0.0058219	0	0.952994	FEM
NONHSAG113231.1	0.300588	[0.08687006; 0.51430590]	0.0058391	0	0.536197	FEM
NONHSAG025214.2	0.302284	[0.08730633; 0.51726143]	0.00585144	0.356893	0.104823	FEM
NONHSAG105699.1	0.300014	[0.08659369; 0.51343529]	0.00586467	0	0.778519	FEM
NONHSAG101229.2	0.29955	[0.08641793; 0.51268176]	0.00587433	0	0.850462	FEM
NONHSAG037115.2	0.301866	[0.08700895; 0.51672220]	0.00589209	0.319775	0.134896	FEM
NONHSAG062592.1	0.300446	[0.08653105; 0.51436115]	0.00590804	0.150861	0.296323	FEM
NONHSAG002689.2	-0.299904	[-0.51357469; -0.08623278]	0.00594115	0.0508519	0.395289	FEM
NONHSAG036605.2	0.300348	[0.08632895; 0.51436786]	0.00594854	0.155396	0.291769	FEM
NONHSAG087011.1	0.299964	[0.08619481; 0.51373323]	0.00595407	0.116098	0.331152	FEM
NONHSAG110680.1	0.300099	[0.08622895; 0.51396992]	0.00595519	0	0.538017	FEM
NONHSAG096690.1	0.30046	[0.08632194; 0.51459892]	0.00595769	0.163379	0.283754	FEM
NONHSAG076559.2	0.301218	[0.08645300; 0.51598281]	0.00597788	0.347525	0.11212	FEM
NONHSAG090619.1	0.299758	[0.08600396; 0.51351274]	0.00598495	0	0.555338	FEM
NONHSAG057937.1	0.300536	[0.08615776; 0.51491389]	0.00600118	0.265114	0.183953	FEM
NONHSAG054639.2	0.300227	[0.08598357; 0.51447080]	0.00602133	0.2999	0.152163	FEM
NONHSAG085913.1	0.300087	[0.08592574; 0.51424870]	0.00602551	0.121894	0.325362	FEM
NONHSAG026383.2	0.30053	[0.08604083; 0.51501852]	0.00602824	0.350868	0.109492	FEM
NONHSAG039115.2	0.298682	[0.08551076; 0.51185329]	0.0060285	0	0.799501	FEM
NONHSAG112617.1	-0.300749	[-0.51542691; -0.08607090]	0.00603593	0.460044	0.0404922	FEM
NONHSAG002227.2	0.299859	[0.08579073; 0.51392642]	0.00604192	0.194477	0.252633	FEM
NONHSAG036974.2	0.2991	[0.08555585; 0.51264412]	0.00604614	0	0.595942	FEM
NONHSAG016496.2	0.29887	[0.08544658; 0.51229385]	0.00605647	0	0.656216	FEM
NONHSAG031881.2	0.298417	[0.08528623; 0.51154799]	0.0060638	0	0.852	FEM
NONHSAG031567.2	0.299783	[0.08563851; 0.51392799]	0.00607283	0.310769	0.142629	FEM
NONHSAG044922.2	0.301145	[0.08602511; 0.51626497]	0.00607341	0.433832	0.0538163	FEM
NONHSAG052681.2	0.300577	[0.08583759; 0.51531636]	0.00607938	0.402174	0.0727514	FEM
NONHSAG029818.2	0.301847	[0.08616084; 0.51753379]	0.00608869	0.533572	0.0146081	FEM
NONHSAG104130.1	0.297893	[0.08501563; 0.51077050]	0.00609263	0	0.961584	FEM
NONHSAG113155.1	0.297693	[0.08493813; 0.51044864]	0.00609754	0	0.964001	FEM
NONHSAG023565.3	0.298278	[0.08507794; 0.51147777]	0.00610398	0	0.922576	FEM
NONHSAG053902.2	0.29904	[0.08518252; 0.51289846]	0.00613095	0	0.476629	FEM
NONHSAG068508.1	0.298932	[0.08514490; 0.51272010]	0.00613259	0.0257085	0.419277	FEM
NONHSAG031059.3	0.298372	[0.08472083; 0.51202258]	0.00619616	0	0.582463	FEM
NONHSAG039203.2	0.297291	[0.08438406; 0.51019889]	0.00620344	0	0.930249	FEM
NONHSAG114317.1	0.299519	[0.08500891; 0.51402914]	0.00620523	0.376829	0.0900237	FEM
NONHSAG108365.1	0.300131	[0.08516521; 0.51509660]	0.0062094	0.399088	0.0747573	FEM
NONHSAG084201.1	0.297779	[0.08449096; 0.51106643]	0.00621104	0	0.784018	FEM
NONHSAG045096.2	0.297787	[0.08447973; 0.51109428]	0.00621433	0	0.78747	FEM
NONHSAG048282.2	0.298762	[0.08473870; 0.51278626]	0.00621863	0	0.484863	FEM
NONHSAG004735.2	0.297712	[0.08443615; 0.51098733]	0.00621972	0	0.791458	FEM
NONHSAG078005.1	-0.300377	[-0.51561078; -0.08514351]	0.00623141	0.535764	0.0140829	FEM
NONHSAG087681.1	0.297245	[0.08422435; 0.51026495]	0.00623901	0	0.89364	FEM
NONHSAG044810.2	-0.300402	[-0.51571922; -0.08508478]	0.00624725	0.396166	0.0766815	FEM
NONHSAG102565.1	0.299858	[0.08491078; 0.51480494]	0.00625205	0.459694	0.0406559	FEM
NONHSAG084963.1	0.298471	[0.08441877; 0.51252261]	0.00627615	0.194719	0.252391	FEM
NONHSAG050616.2	0.300312	[0.08493380; 0.51569110]	0.00627758	0.491354	0.0274357	FEM
NONHSAG088741.1	0.298334	[0.08430185; 0.51236671]	0.00629524	0.246117	0.201991	FEM
NONHSAG014264.2	0.297434	[0.08399268; 0.51087550]	0.00630865	0	0.72248	FEM
NONHSAG108409.1	0.299234	[0.08448028; 0.51398746]	0.00631368	0.417962	0.0629289	FEM
NONHSAG033244.3	0.297311	[0.08393278; 0.51068875]	0.0063148	0	0.78263	FEM
NONHSAG091216.1	0.299424	[0.08451498; 0.51433385]	0.00631833	0.369048	0.0956782	FEM
NONHSAG082941.1	0.297548	[0.08396292; 0.51113318]	0.00632384	0	0.546351	FEM
NONHSAG092698.1	0.298861	[0.08429377; 0.51342868]	0.00633354	0.302053	0.150258	FEM
NONHSAG016668.2	0.297204	[0.08379525; 0.51061195]	0.00634115	0	0.7013	FEM
NONHSAG066484.1	0.298133	[0.08402936; 0.51223764]	0.00634804	0.0797602	0.367156	FEM
NONHSAG029726.2	0.297401	[0.08381354; 0.51098764]	0.00635032	0	0.723488	FEM
NONHSAG082747.1	-0.298219	[-0.51244461; -0.08399388]	0.00636269	0.111642	0.335597	FEM
NONHSAG110064.1	0.298926	[0.08416278; 0.51368832]	0.00637005	0.341039	0.117292	FEM
NONHSAG091301.1	0.29794	[0.08383764; 0.51204316]	0.00638181	0.20639	0.240797	FEM
NONHSAG078325.1	0.29683	[0.08349290; 0.51016759]	0.00638982	0	0.670808	FEM
NONHSAG013724.2	0.298045	[0.08381258; 0.51227647]	0.00639522	0.238523	0.209309	FEM
NONHSAG038091.2	0.296762	[0.08342964; 0.51009392]	0.00640072	0	0.850341	FEM
NONHSAG082375.1	0.297594	[0.08363059; 0.51155771]	0.0064089	0.206757	0.240433	FEM
NONHSAG062214.1	0.297011	[0.08340919; 0.51061208]	0.00642314	0	0.701509	FEM
NONHSAG079079.1	0.29655	[0.08325344; 0.50984652]	0.0064297	0	0.787741	FEM
NONHSAG094417.1	0.295928	[0.08307498; 0.50878061]	0.00643065	0	0.937841	FEM
NONHSAG104927.1	0.297271	[0.08342470; 0.51111634]	0.00643741	0	0.527763	FEM
NONHSAG111118.1	-0.297249	[-0.51112226; -0.08337570]	0.00644808	0.145359	0.301847	FEM
NONHSAG014743.2	0.298384	[0.08365706; 0.51311032]	0.00645723	0.33006	0.126262	FEM
NONHSAG076588.1	0.296229	[0.08303547; 0.50942301]	0.00646162	0	0.760195	FEM
NONHSAG078983.2	0.296358	[0.08306425; 0.50965203]	0.00646345	0	0.72668	FEM
NONHSAG099127.1	0.296242	[0.08302429; 0.50946042]	0.00646533	0	0.846135	FEM
NONHSAG011666.3	0.29629	[0.08297831; 0.50960206]	0.00648018	0	0.819475	FEM
NONHSAG009305.2	0.295745	[0.08274827; 0.50874249]	0.00649962	0	0.942602	FEM
NONHSAG087587.1	0.299055	[0.08363853; 0.51447194]	0.00650853	0.470903	0.0356118	FEM
NONHSAG078394.2	0.296642	[0.08289573; 0.51038816]	0.00652556	0	0.490862	FEM
NONHSAG030070.2	0.296218	[0.08273104; 0.50970500]	0.00653719	0	0.75957	FEM
NONHSAG063280.1	0.297869	[0.08316302; 0.51257518]	0.00654449	0.400292	0.0739711	FEM
NONHSAG105574.1	0.296617	[0.08277223; 0.51046266]	0.0065549	0.121964	0.325293	FEM
NONHSAG106014.1	0.297059	[0.08284892; 0.51127000]	0.00656664	0.313264	0.140471	FEM
NONHSAG108630.1	0.297927	[0.08307936; 0.51277516]	0.00656955	0.362974	0.100202	FEM
NONHSAG111762.1	0.296017	[0.08253138; 0.50950293]	0.00657343	0	0.684346	FEM
NONHSAG087943.1	0.297388	[0.08286882; 0.51190798]	0.00658473	0.297574	0.154229	FEM
NONHSAG058061.2	0.297508	[0.08290117; 0.51211544]	0.006585	0.266575	0.182583	FEM
NONHSAG001219.3	0.295842	[0.08238382; 0.50929950]	0.00659842	0	0.704742	FEM
NONHSAG007652.2	-0.298255	[-0.51347645; -0.08303378]	0.00660399	0.545996	0.0118021	FEM
NONHSAG027820.2	0.296285	[0.08240048; 0.51016908]	0.00662549	0.0483448	0.397702	FEM
NONHSAG114061.1	0.298191	[0.08291972; 0.51346246]	0.00662825	0.542783	0.0124885	FEM
NONHSAG051398.2	0.29743	[0.08270402; 0.51215672]	0.0066293	0.317816	0.136565	FEM
NONHSAG084721.1	0.297357	[0.08267724; 0.51203651]	0.00663091	0.261011	0.187813	FEM
NONHSAG029211.2	0.295934	[0.08222623; 0.50964264]	0.00664504	0	0.451179	FEM
NONHSAG094011.1	0.296127	[0.08223846; 0.51001524]	0.00665554	0	0.494941	FEM
NONHSAG102851.1	0.295969	[0.08218647; 0.50975093]	0.0066576	0	0.466866	FEM
NONHSAG018540.2	0.296207	[0.08224260; 0.51017193]	0.00666018	0.148275	0.298919	FEM
NONHSAG043588.2	-0.298419	[-0.51399007; -0.08284712]	0.00666258	0.464446	0.0384685	FEM
NONHSAG088296.1	0.296857	[0.08240947; 0.51130365]	0.00666359	0.296548	0.155144	FEM
NONHSAG052016.2	-0.296869	[-0.51135767; -0.08238056]	0.00667184	0.375517	0.090966	FEM
NONHSAG104839.1	0.294716	[0.08171345; 0.50771783]	0.00668969	0	0.958807	FEM
NONHSAG036521.3	0.29836	[0.08270483; 0.51401430]	0.00669449	0.512793	0.020261	FEM
NONHSAG026528.2	0.296535	[0.08219256; 0.51087665]	0.00669613	0.356967	0.104766	FEM
NONHSAG012885.2	0.295218	[0.08178071; 0.50865536]	0.00670818	0	0.568783	FEM
NONHSAG100380.2	0.295334	[0.08178344; 0.50888393]	0.00671571	0	0.4587	FEM
NONHSAG043472.2	0.295521	[0.08182565; 0.50921691]	0.00671821	0	0.518178	FEM
NONHSAG065695.1	-0.296215	[-0.51045401; -0.08197626]	0.00672886	0.317004	0.137258	FEM
NONHSAG112149.1	0.294932	[0.08160629; 0.50825681]	0.00673266	0	0.786048	FEM
NONHSAG081031.1	0.296591	[0.08205999; 0.51112276]	0.00673409	0.237546	0.210255	FEM
NONHSAG066839.1	0.296686	[0.08203695; 0.51133566]	0.00674673	0.351835	0.108737	FEM
NONHSAG077763.1	0.29514	[0.08144347; 0.50883691]	0.00678964	0	0.597612	FEM
NONHSAG103375.1	0.295293	[0.08147351; 0.50911235]	0.00679278	0	0.500623	FEM
NONHSAG026875.2	0.294517	[0.08125243; 0.50778125]	0.00679458	0	0.830372	FEM
NONHSAG017670.2	0.297456	[0.08201901; 0.51289348]	0.00680599	0.527724	0.0160746	FEM
NONHSAG039876.2	-0.599859	[-1.03431822; -0.16539922]	0.00680633	0.582575	0.0057506	REM
NONHSAG016227.2	0.294871	[0.08125375; 0.50848859]	0.00681963	0	0.644484	FEM
NONHSAG042425.2	0.296874	[0.08177841; 0.51196903]	0.00682665	0.372616	0.0930651	FEM
NONHSAG072840.1	0.296	[0.08153759; 0.51046179]	0.00682666	0.232131	0.21551	FEM
NONHSAG097163.1	0.294666	[0.08116771; 0.50816345]	0.00682728	0	0.765602	FEM
NONHSAG048268.2	0.295954	[0.08150589; 0.51040228]	0.00683162	0.206261	0.240925	FEM
NONHSAG097780.1	0.294467	[0.08105175; 0.50788315]	0.00684329	0	0.793463	FEM
NONHSAG109107.1	0.293688	[0.08081986; 0.50655534]	0.0068478	0	0.985728	FEM
NONHSAG115163.1	0.297205	[0.08175822; 0.51265156]	0.00685545	0.490052	0.0279171	FEM
NONHSAG067746.1	-0.295496	[-0.50973574; -0.08125530]	0.00686397	0.24825	0.199946	FEM
NONHSAG073654.1	0.295029	[0.08109863; 0.50895984]	0.0068714	0.0572903	0.38907	FEM
NONHSAG098724.1	0.293895	[0.08078636; 0.50700333]	0.00687151	0	0.935688	FEM
NONHSAG066099.1	0.294137	[0.08077882; 0.50749561]	0.00689096	0	0.665459	FEM
NONHSAG050480.2	0.295219	[0.08103940; 0.50939796]	0.00690049	0.121485	0.325771	FEM
NONHSAG063661.1	0.296053	[0.08124137; 0.51086511]	0.00690757	0.422324	0.060347	FEM
NONHSAG077868.1	0.295019	[0.08084260; 0.50919466]	0.00693772	0.153484	0.293689	FEM
NONHSAG039531.2	0.294479	[0.08065917; 0.50829940]	0.00694711	0	0.57516	FEM
NONHSAG110879.1	0.293758	[0.08043354; 0.50708169]	0.0069545	0	0.740913	FEM
NONHSAG044517.2	-0.294233	[-0.50790332; -0.08056267]	0.00695477	0	0.580795	FEM
NONHSAG106923.1	0.294022	[0.08048228; 0.50756219]	0.00696077	0	0.602673	FEM
NONHSAG057057.1	0.294093	[0.08049193; 0.50769329]	0.00696331	0	0.568968	FEM
NONHSAG072639.1	0.294709	[0.08064525; 0.50877320]	0.00696738	0.158594	0.288558	FEM
NONHSAG086605.1	0.293639	[0.08029264; 0.50698469]	0.00698319	0	0.78692	FEM
NONHSAG060808.1	0.294	[0.08038852; 0.50761055]	0.00698393	0.0811931	0.365748	FEM
NONHSAG048458.2	0.295523	[0.08079588; 0.51025074]	0.00698638	0.324541	0.130868	FEM
NONHSAG098237.1	0.29337	[0.08017189; 0.50656772]	0.00699574	0	0.793934	FEM
NONHSAG103911.1	0.295608	[0.08075378; 0.51046262]	0.0070036	0.372171	0.0933896	FEM
NONHSAG109382.1	0.295679	[0.08076345; 0.51059378]	0.00700613	0.39427	0.0779435	FEM
NONHSAG095077.1	0.29366	[0.08015616; 0.50716414]	0.00702101	0	0.757734	FEM
NONHSAG103775.1	0.294508	[0.08035459; 0.50866236]	0.0070298	0.121189	0.326067	FEM
NONHSAG101357.1	0.293229	[0.07995133; 0.50650713]	0.00704428	0	0.868317	FEM
NONHSAG023520.2	0.295141	[0.08046255; 0.50981930]	0.00704694	0.330483	0.125911	FEM
NONHSAG047378.3	-0.62959	[-1.08767501; -0.17150462]	0.00706397	0.632563	0.00162103	REM
NONHSAG037832.2	0.293558	[0.07988604; 0.50723043]	0.00708571	0	0.672531	FEM
NONHSAG058419.2	0.293004	[0.07972461; 0.50628381]	0.00708857	0	0.864431	FEM
NONHSAG109834.1	0.294257	[0.08003126; 0.50848204]	0.0070977	0.185565	0.261525	FEM
NONHSAG072458.1	0.293347	[0.07977896; 0.50691417]	0.00709898	0	0.632472	FEM
NONHSAG109286.1	0.294304	[0.08002737; 0.50858143]	0.00710221	0.10532	0.34189	FEM
NONHSAG036096.2	0.294076	[0.07989889; 0.50825407]	0.00712003	0.0702802	0.37644	FEM
NONHSAG069529.1	0.293377	[0.07968861; 0.50706635]	0.00712551	0	0.467707	FEM
NONHSAG105661.1	0.294684	[0.07988624; 0.50948222]	0.00716771	0.381694	0.0865696	FEM
NONHSAG079937.1	0.295923	[0.08021471; 0.51163121]	0.00716968	0.532205	0.0149424	FEM
NONHSAG076070.1	0.294384	[0.07979327; 0.50897496]	0.00717084	0.285846	0.164787	FEM
NONHSAG067650.1	0.292417	[0.07920917; 0.50562514]	0.00718465	0	0.831663	FEM
NONHSAG083967.1	0.292038	[0.07901377; 0.50506208]	0.00720986	0	0.907758	FEM
NONHSAG061168.1	0.293495	[0.07933807; 0.50765214]	0.00722882	0.231548	0.216077	FEM
NONHSAG031703.3	0.293056	[0.07918580; 0.50692586]	0.00723794	0.0931868	0.353922	FEM
NONHSAG006222.3	0.293367	[0.07923948; 0.50749461]	0.0072462	0.125154	0.322102	FEM
NONHSAG037820.2	0.293879	[0.07928965; 0.50846783]	0.00727013	0.290951	0.160164	FEM
NONHSAG057901.2	0.292737	[0.07895117; 0.50652347]	0.00727847	0.011055	0.43302	FEM
NONHSAG112065.1	0.292335	[0.07884012; 0.50582912]	0.00727913	0	0.746752	FEM
NONHSAG003742.2	0.292276	[0.07880785; 0.50574489]	0.00728367	0	0.804976	FEM
NONHSAG109942.1	0.29342	[0.07905588; 0.50778320]	0.0073001	0.338514	0.119331	FEM
NONHSAG005316.3	0.292912	[0.07884713; 0.50697732]	0.00731984	0.22854	0.219009	FEM
NONHSAG006560.2	0.292203	[0.07862396; 0.50578168]	0.0073287	0	0.523544	FEM
NONHSAG028948.3	0.291342	[0.07836610; 0.50431847]	0.00733596	0	0.941618	FEM
NONHSAG111863.1	0.292407	[0.07865173; 0.50616164]	0.00733614	0	0.59673	FEM
NONHSAG110095.1	0.292904	[0.07873304; 0.50707514]	0.00735056	0.193557	0.253549	FEM
NONHSAG082425.1	0.294285	[0.07902924; 0.50954152]	0.00737112	0.509995	0.0211182	FEM
NONHSAG095426.1	0.292169	[0.07844234; 0.50589615]	0.00737626	0.161745	0.285394	FEM
NONHSAG063041.1	0.292479	[0.07851909; 0.50643920]	0.00737804	0	0.464212	FEM
NONHSAG110387.1	0.291532	[0.07823614; 0.50482692]	0.00738595	0	0.614374	FEM
NONHSAG108563.1	0.294438	[0.07899940; 0.50987619]	0.00739052	0.48903	0.0282984	FEM
NONHSAG104308.1	0.294884	[0.07910320; 0.51066425]	0.00739487	0.543612	0.0123088	FEM
NONHSAG058637.2	0.293661	[0.07877201; 0.50855075]	0.00739577	0.445116	0.0478142	FEM
NONHSAG058329.1	0.292705	[0.07844064; 0.50696935]	0.00741646	0.183721	0.263368	FEM
NONHSAG066013.2	0.292844	[0.07845157; 0.50723593]	0.00742372	0.214801	0.232485	FEM
NONHSAG105165.1	0.29295	[0.07841238; 0.50748860]	0.00744248	0.381788	0.0865038	FEM
NONHSAG081756.1	0.29171	[0.07798906; 0.50542995]	0.00746787	0	0.563664	FEM
NONHSAG020274.2	0.291848	[0.07796026; 0.50573577]	0.00748624	0.193867	0.25324	FEM
NONHSAG067136.2	-0.290965	[-0.50424968; -0.07767963]	0.00749875	0	0.809457	FEM
NONHSAG013955.2	0.29199	[0.07793550; 0.50604513]	0.00750377	0.087738	0.359304	FEM
NONHSAG018783.3	0.293313	[0.07827684; 0.50834851]	0.007507	0.44853	0.0460774	FEM
NONHSAG105315.1	0.290532	[0.07735203; 0.50371257]	0.00755846	0	0.895006	FEM
NONHSAG065264.1	0.290394	[0.07727754; 0.50351041]	0.0075691	0	0.860549	FEM
NONHSAG071128.1	0.292079	[0.07768857; 0.50646868]	0.00757958	0.188879	0.258215	FEM
NONHSAG060360.1	0.290601	[0.07728243; 0.50391858]	0.00758325	0	0.85379	FEM
NONHSAG080247.1	0.291629	[0.07752804; 0.50573011]	0.00759112	0.240899	0.207013	FEM
NONHSAG076047.1	0.290806	[0.07729623; 0.50431629]	0.00759481	0	0.485007	FEM
NONHSAG055649.2	0.292324	[0.07768140; 0.50696633]	0.00759994	0.247607	0.200561	FEM
NONHSAG087315.1	-0.293236	[-0.50854865; -0.07792254]	0.00760026	0.542385	0.0125752	FEM
NONHSAG074623.1	0.291571	[0.07743606; 0.50570693]	0.00761275	0.14117	0.306051	FEM
NONHSAG104028.1	0.292179	[0.07757610; 0.50678239]	0.00761878	0.325509	0.130056	FEM
NONHSAG109336.1	0.290896	[0.07723424; 0.50455876]	0.00761914	0	0.464214	FEM
NONHSAG014879.2	0.289897	[0.07689962; 0.50289502]	0.00763887	0	0.923232	FEM
NONHSAG103578.1	0.292223	[0.07751559; 0.50693027]	0.00763913	0.356994	0.104746	FEM
NONHSAG095117.1	0.291513	[0.07730733; 0.50571877]	0.00764478	0.166734	0.280387	FEM
NONHSAG019101.3	0.29114	[0.07716081; 0.50511973]	0.00765831	0.00669273	0.437075	FEM
NONHSAG005119.2	0.291149	[0.07713919; 0.50515859]	0.0076651	0.172515	0.274589	FEM
NONHSAG055211.3	-0.292355	[-0.50726945; -0.07744008]	0.00767036	0.399801	0.0742911	FEM
NONHSAG053584.2	0.293492	[0.07770806; 0.50927546]	0.00767973	0.53852	0.0134411	FEM
NONHSAG040095.2	0.289636	[0.07664477; 0.50262665]	0.00769183	0	0.91529	FEM
NONHSAG012547.2	0.290186	[0.07677388; 0.50359861]	0.00769657	0	0.690791	FEM
NONHSAG079927.1	0.291391	[0.07702053; 0.50576190]	0.00771712	0.257113	0.1915	FEM
NONHSAG011899.2	0.290937	[0.07688135; 0.50499256]	0.00772258	0.150698	0.296486	FEM
NONHSAG088310.1	0.289684	[0.07654890; 0.50281842]	0.00772295	0	0.779751	FEM
NONHSAG093787.1	0.290618	[0.07673822; 0.50449726]	0.0077394	0	0.470576	FEM
NONHSAG094294.2	0.291707	[0.07700588; 0.50640856]	0.00774512	0.363937	0.0994778	FEM
NONHSAG070387.1	0.289857	[0.07651690; 0.50319624]	0.00774524	0	0.773807	FEM
NONHSAG026839.2	0.291442	[0.07692450; 0.50595961]	0.00774837	0.232073	0.215566	FEM
NONHSAG026446.3	0.292453	[0.07718740; 0.50771807]	0.00774947	0.500451	0.0242198	FEM
NONHSAG055127.2	0.28926	[0.07628901; 0.50223088]	0.00776553	0	0.941787	FEM
NONHSAG048251.2	0.289213	[0.07619782; 0.50222915]	0.00778832	0	0.928871	FEM
NONHSAG002142.3	0.290802	[0.07660269; 0.50500046]	0.00779221	0.35167	0.108866	FEM
NONHSAG091270.1	0.291034	[0.07663147; 0.50543743]	0.00780157	0.233825	0.213863	FEM
NONHSAG028042.2	0.291272	[0.07669354; 0.50585020]	0.00780169	0.354445	0.10671	FEM
NONHSAG082901.1	0.289247	[0.07608360; 0.50241063]	0.00782393	0	0.849581	FEM
NONHSAG089271.1	0.290239	[0.07632855; 0.50415040]	0.00782858	0	0.444736	FEM
NONHSAG077885.1	0.289842	[0.07621524; 0.50346896]	0.00783112	0	0.507587	FEM
NONHSAG098822.2	0.29277	[0.07697408; 0.50856638]	0.00783431	0.531032	0.0152334	FEM
NONHSAG103802.1	0.289962	[0.07617032; 0.50375451]	0.00785329	0	0.457316	FEM
NONHSAG071256.1	0.291517	[0.07656986; 0.50646499]	0.00785587	0.413305	0.0657487	FEM
NONHSAG099766.1	0.29123	[0.07649287; 0.50596741]	0.00785631	0.340552	0.117684	FEM
NONHSAG046684.2	-0.29141	[-0.50628246; -0.07653712]	0.00785716	0.417599	0.0631463	FEM
NONHSAG115155.1	0.290068	[0.07617141; 0.50396417]	0.00786099	0.0129024	0.431298	FEM
NONHSAG035745.2	0.289688	[0.07606725; 0.50330778]	0.00786224	0	0.485623	FEM
NONHSAG008665.3	0.289571	[0.07599762; 0.50314382]	0.00787356	0.00816732	0.435706	FEM
NONHSAG114719.1	0.291762	[0.07654047; 0.50698410]	0.00788289	0.467401	0.0371445	FEM
NONHSAG031282.2	0.290415	[0.07618231; 0.50464833]	0.00788428	0.206801	0.24039	FEM
NONHSAG071631.1	0.289582	[0.07596058; 0.50320244]	0.00788515	0	0.56188	FEM
NONHSAG078528.1	0.290992	[0.07631968; 0.50566398]	0.00788829	0.398056	0.0754339	FEM
NONHSAG043741.2	0.288645	[0.07565553; 0.50163379]	0.00790247	0	0.875319	FEM
NONHSAG075313.1	0.288939	[0.07572309; 0.50215484]	0.00790527	0	0.866266	FEM
NONHSAG111344.1	0.29053	[0.07611919; 0.50494170]	0.00791137	0.329654	0.126598	FEM
NONHSAG023740.2	0.289722	[0.07589641; 0.50354836]	0.00791459	0.022082	0.422695	FEM
NONHSAG107661.1	0.290085	[0.07598406; 0.50418626]	0.00791674	0.0539464	0.392304	FEM
NONHSAG112533.1	0.290845	[0.07615294; 0.50553713]	0.0079255	0.289133	0.161806	FEM
NONHSAG035447.3	0.291549	[0.07631629; 0.50678225]	0.00793161	0.479703	0.0319318	FEM
NONHSAG100186.1	0.28996	[0.07588842; 0.50403060]	0.00793503	0.27487	0.174859	FEM
NONHSAG094294.1	0.288318	[0.07544469; 0.50119076]	0.00793915	0	0.972091	FEM
NONHSAG002005.2	0.288527	[0.07547136; 0.50158320]	0.00794741	0	0.912047	FEM
NONHSAG052119.2	0.29029	[0.07591740; 0.50466297]	0.00795181	0.26339	0.185572	FEM
NONHSAG055878.2	0.291821	[0.07631006; 0.50733156]	0.00795403	0.522441	0.0174821	FEM
NONHSAG011864.2	0.290478	[0.07595725; 0.50499912]	0.00795453	0.213573	0.233697	FEM
NONHSAG003299.2	0.289473	[0.07567987; 0.50326632]	0.00795879	0	0.579498	FEM
NONHSAG104988.1	0.291451	[0.07615760; 0.50674499]	0.00797027	0.465563	0.0379647	FEM
NONHSAG101337.2	0.291261	[0.07609887; 0.50642413]	0.00797293	0.543054	0.0124295	FEM
NONHSAG005691.2	0.288791	[0.07541776; 0.50216352]	0.00798337	0	0.833499	FEM
NONHSAG045619.2	-0.590024	[-1.02599150; -0.15405614]	0.00798751	0.587941	0.00510789	REM
NONHSAG045803.2	-0.590024	[-1.02599150; -0.15405614]	0.00798751	0.587941	0.00510789	REM
NONHSAG045991.2	-0.590024	[-1.02599150; -0.15405614]	0.00798751	0.587941	0.00510789	REM
NONHSAG046157.2	-0.590024	[-1.02599150; -0.15405614]	0.00798751	0.587941	0.00510789	REM
NONHSAG046321.2	-0.590024	[-1.02599150; -0.15405614]	0.00798751	0.587941	0.00510789	REM
NONHSAG046502.2	-0.590024	[-1.02599150; -0.15405614]	0.00798751	0.587941	0.00510789	REM
NONHSAG046685.2	-0.590024	[-1.02599150; -0.15405614]	0.00798751	0.587941	0.00510789	REM
NONHSAG089185.1	0.288651	[0.07535923; 0.50194270]	0.00798986	0	0.766327	FEM
NONHSAG025124.2	-0.290589	[-0.50537014; -0.07580725]	0.00800679	0.477	0.0330359	FEM
NONHSAG030727.2	0.288135	[0.07510147; 0.50116948]	0.00802623	0	0.914878	FEM
NONHSAG025362.2	-0.643558	[-1.11940760; -0.16770879]	0.00803051	0.65084	0.000915649	REM
NONHSAG002576.2	0.290525	[0.07570920; 0.50533994]	0.00803063	0.388949	0.0815392	FEM
NONHSAG048182.2	0.2894	[0.07534534; 0.50345377]	0.00805146	0.127986	0.319268	FEM
NONHSAG024860.2	0.288351	[0.07503780; 0.50166394]	0.00806169	0	0.640102	FEM
NONHSAG075702.1	0.287861	[0.07486965; 0.50085263]	0.00807378	0	0.90407	FEM
NONHSAG105646.1	0.288648	[0.07505258; 0.50224394]	0.00808024	0	0.528484	FEM
NONHSAG074944.1	0.288477	[0.07495660; 0.50199763]	0.00809551	0	0.529242	FEM
NONHSAG063630.1	0.290524	[0.07548235; 0.50556498]	0.00809729	0.39951	0.0744814	FEM
NONHSAG079841.1	0.288887	[0.07504461; 0.50272876]	0.00810098	0	0.561334	FEM
NONHSAG068641.1	0.289662	[0.07523306; 0.50409106]	0.00810481	0.33609	0.121303	FEM
NONHSAG098863.1	0.288572	[0.07493946; 0.50220523]	0.00810796	0.0388059	0.406842	FEM
NONHSAG055258.3	0.28887	[0.07498671; 0.50275365]	0.00811689	0	0.469553	FEM
NONHSAG103848.1	0.289694	[0.07513554; 0.50425179]	0.00813614	0.332409	0.124321	FEM
NONHSAG087059.1	0.288607	[0.07484367; 0.50237080]	0.00813915	0	0.470693	FEM
NONHSAG002150.2	0.289166	[0.07498467; 0.50334814]	0.00814034	0.196511	0.250607	FEM
NONHSAG092663.1	0.291086	[0.07546273; 0.50671014]	0.0081462	0.485138	0.0297814	FEM
NONHSAG048421.2	0.291264	[0.07548980; 0.50703816]	0.0081518	0.512688	0.0202927	FEM
NONHSAG112494.1	0.287772	[0.07456106; 0.50098385]	0.00815892	0	0.725806	FEM
NONHSAG084770.1	0.288528	[0.07475334; 0.50230349]	0.00815999	0	0.466627	FEM
NONHSAG088412.1	0.287713	[0.07453101; 0.50089478]	0.0081633	0	0.834077	FEM
NONHSAG036937.2	0.288159	[0.07462810; 0.50168937]	0.0081688	0	0.695602	FEM
NONHSAG108449.1	0.289655	[0.07498995; 0.50432064]	0.00817646	0.364479	0.0990718	FEM
NONHSAG087733.1	0.287351	[0.07437684; 0.50032490]	0.00818141	0	0.891715	FEM
NONHSAG021432.2	0.288914	[0.07477671; 0.50305069]	0.0081828	0.314125	0.13973	FEM
NONHSAG089226.1	0.290974	[0.07528237; 0.50666659]	0.00819102	0.519424	0.018322	FEM
NONHSAG087170.1	0.287592	[0.07436936; 0.50081409]	0.00820237	0	0.862069	FEM
NONHSAG036962.3	0.289544	[0.07487061; 0.50421779]	0.00820346	0.349428	0.110621	FEM
NONHSAG053469.2	0.287557	[0.07434808; 0.50076669]	0.0082061	0	0.905051	FEM
NONHSAG012107.2	0.288034	[0.07444570; 0.50162311]	0.00821381	0	0.574048	FEM
NONHSAG109920.1	0.289517	[0.07478726; 0.50424692]	0.00822626	0.332377	0.124347	FEM
NONHSAG040214.2	0.288015	[0.07438569; 0.50164448]	0.00823034	0	0.455681	FEM
NONHSAG000150.2	0.288058	[0.07439336; 0.50172175]	0.00823133	0	0.59222	FEM
NONHSAG089293.1	0.287469	[0.07423287; 0.50070582]	0.00823392	0	0.865818	FEM
NONHSAG109039.1	0.290767	[0.07506488; 0.50646961]	0.00823976	0.554304	0.0101503	FEM
NONHSAG063017.1	0.289941	[0.07480636; 0.50507646]	0.00825331	0.482319	0.0308852	FEM
NONHSAG107835.1	0.288351	[0.07432664; 0.50237577]	0.00827421	0.213606	0.233664	FEM
NONHSAG011697.2	0.289553	[0.07461671; 0.50448936]	0.00828013	0.459721	0.0406432	FEM
NONHSAG097804.1	0.289482	[0.07457598; 0.50438860]	0.00828689	0.392746	0.0789653	FEM
NONHSAG064894.1	0.288153	[0.07420870; 0.50209827]	0.00829442	0.0141359	0.430146	FEM
NONHSAG028942.2	0.287645	[0.07405362; 0.50123717]	0.00830176	0	0.488381	FEM
NONHSAG066160.1	0.288208	[0.07419606; 0.50222005]	0.00830248	0.227363	0.220158	FEM
NONHSAG075499.1	0.286679	[0.07378181; 0.49957577]	0.00830873	0	0.976698	FEM
NONHSAG044816.2	0.289228	[0.07442614; 0.50402942]	0.00831225	0.41799	0.0629118	FEM
NONHSAG077762.1	0.287099	[0.07385813; 0.50033998]	0.00831839	0	0.872459	FEM
NONHSAG029741.2	0.286714	[0.07375150; 0.49967667]	0.0083207	0	0.950646	FEM
NONHSAG016505.2	0.287188	[0.07387049; 0.50050530]	0.00832158	0	0.831542	FEM
NONHSAG081662.1	0.287131	[0.07376523; 0.50049672]	0.00834913	0	0.811597	FEM
NONHSAG006824.2	0.287517	[0.07386187; 0.50117277]	0.00834992	0	0.530141	FEM
NONHSAG086534.1	0.28895	[0.07420661; 0.50369412]	0.008357	0.426424	0.0579737	FEM
NONHSAG105673.1	0.288058	[0.07396821; 0.50214700]	0.00835977	0	0.450929	FEM
NONHSAG043106.3	-0.287178	[-0.50062684; -0.07373014]	0.00836353	0	0.655171	FEM
NONHSAG028250.3	-0.603486	[-1.05208963; -0.15488271]	0.00837168	0.612983	0.00278798	REM
NONHSAG091716.1	0.288961	[0.07396943; 0.50395207]	0.00842977	0.435888	0.0526929	FEM
NONHSAG003481.2	0.288121	[0.07375221; 0.50248929]	0.00843044	0.272833	0.176748	FEM
NONHSAG057839.1	0.286618	[0.07328877; 0.49994685]	0.00845461	0	0.754171	FEM
NONHSAG063166.1	0.287942	[0.07358842; 0.50229534]	0.00846652	0.2152	0.232092	FEM
NONHSAG062087.1	0.288616	[0.07373560; 0.50349564]	0.00847416	0.477912	0.0326607	FEM
NONHSAG101777.1	0.287293	[0.07325418; 0.50133136]	0.00851829	0.138701	0.308528	FEM
NONHSAG084574.1	0.287952	[0.07339468; 0.50250910]	0.00852676	0.309751	0.143513	FEM
NONHSAG075742.1	0.285911	[0.07285191; 0.49897098]	0.00853379	0	0.934442	FEM
NONHSAG096118.1	0.289074	[0.07363125; 0.50451691]	0.00854192	0.502973	0.0233735	FEM
NONHSAG034302.2	-0.287827	[-0.50234228; -0.07331104]	0.00854268	0.414787	0.0648441	FEM
NONHSAG051811.2	0.28897	[0.07358384; 0.50435713]	0.00854837	0.439175	0.0509247	FEM
NONHSAG067657.1	0.28782	[0.07325270; 0.50238718]	0.00856014	0.445436	0.0476497	FEM
NONHSAG037254.2	0.288591	[0.07342988; 0.50375163]	0.00856598	0.513816	0.0199535	FEM
NONHSAG107493.1	0.288115	[0.07329725; 0.50293354]	0.00856958	0.38778	0.0823402	FEM
NONHSAG081713.1	0.286069	[0.07275751; 0.49938047]	0.00857553	0	0.730516	FEM
NONHSAG107309.1	0.285978	[0.07272335; 0.49923315]	0.00857897	0	0.798484	FEM
NONHSAG004681.3	0.285519	[0.07256266; 0.49847573]	0.00859267	0	0.838139	FEM
NONHSAG112424.1	0.287395	[0.07300193; 0.50178747]	0.00860424	0.254204	0.194263	FEM
NONHSAG103544.1	0.287903	[0.07310780; 0.50269840]	0.00861144	0.455678	0.0425603	FEM
NONHSAG003799.2	-0.286503	[-0.50026373; -0.07274281]	0.00861441	0.122894	0.324363	FEM
NONHSAG056207.1	0.286951	[0.07281928; 0.50108352]	0.008626	0.177402	0.269692	FEM
NONHSAG004342.2	0.287852	[0.07303370; 0.50267074]	0.0086304	0.373033	0.0927623	FEM
NONHSAG029747.3	0.286736	[0.07271988; 0.50075266]	0.00863995	0.212667	0.23459	FEM
NONHSAG114978.1	0.286508	[0.07263597; 0.50038021]	0.00864807	0.233709	0.213976	FEM
NONHSAG111127.1	0.287755	[0.07291219; 0.50259766]	0.00866046	0.454033	0.0433554	FEM
NONHSAG017960.2	0.287802	[0.07291353; 0.50269041]	0.00866375	0.377487	0.0895527	FEM
NONHSAG073095.1	-0.614144	[-1.07279235; -0.15549517]	0.00867771	0.63279	0.00161024	REM
NONHSAG109376.1	0.287201	[0.07262717; 0.50177557]	0.00870561	0.313398	0.140355	FEM
NONHSAG010146.2	-0.28732	[-0.50199639; -0.07264307]	0.00871	0.440104	0.0504307	FEM
NONHSAG064879.1	0.286135	[0.07232521; 0.49994517]	0.00871576	0	0.455524	FEM
NONHSAG102765.1	0.285575	[0.07216597; 0.49898390]	0.0087213	0	0.779495	FEM
NONHSAG044913.2	0.288067	[0.07276635; 0.50336783]	0.00873047	0.448426	0.0461297	FEM
NONHSAG071638.1	0.287439	[0.07259065; 0.50228755]	0.00873582	0.390466	0.080506	FEM
NONHSAG097180.2	0.285415	[0.07206576; 0.49876425]	0.00874014	0	0.773588	FEM
NONHSAG017744.2	0.287149	[0.07248445; 0.50181339]	0.00874613	0.413295	0.065755	FEM
NONHSAG106133.1	0.286086	[0.07219673; 0.49997440]	0.0087522	0	0.497697	FEM
NONHSAG087210.1	0.286177	[0.07219834; 0.50015479]	0.00875892	0.260841	0.187973	FEM
NONHSAG057544.1	0.285614	[0.07203578; 0.49919173]	0.00876541	0	0.673483	FEM
NONHSAG057133.1	0.288309	[0.07270945; 0.50390851]	0.00876732	0.531411	0.0151388	FEM
NONHSAG095975.1	0.285605	[0.07201924; 0.49918978]	0.00876989	0.0370137	0.408552	FEM
NONHSAG056689.1	0.286216	[0.07214515; 0.50028736]	0.00877883	0.21532	0.231974	FEM
NONHSAG102644.1	0.284525	[0.07170471; 0.49734485]	0.00878329	0	0.955968	FEM
NONHSAG036228.2	0.285908	[0.07196754; 0.49984851]	0.00881039	0.088359	0.358691	FEM
NONHSAG115168.1	0.285781	[0.07192797; 0.49963421]	0.0088128	0	0.531604	FEM
NONHSAG055052.2	0.287937	[0.07236806; 0.50350609]	0.00884504	0.550908	0.0108043	FEM
NONHSAG080346.1	0.285909	[0.07171381; 0.50010390]	0.00889092	0.277821	0.172134	FEM
NONHSAG014764.3	0.286595	[0.07188575; 0.50130326]	0.00889094	0.363365	0.0999073	FEM
NONHSAG109937.1	0.286143	[0.07174057; 0.50054567]	0.0089011	0.302816	0.149585	FEM
NONHSAG066514.1	0.28509	[0.07147096; 0.49870897]	0.00890288	0	0.568539	FEM
NONHSAG070929.1	0.286023	[0.07166585; 0.50037942]	0.00891527	0.238561	0.209272	FEM
NONHSAG068254.1	0.286717	[0.07181286; 0.50162050]	0.00892382	0.413814	0.0654372	FEM
NONHSAG102186.2	0.285742	[0.07155397; 0.49992995]	0.00892852	0.164455	0.282675	FEM
NONHSAG003911.2	0.285061	[0.07137743; 0.49874523]	0.00893048	0	0.566474	FEM
NONHSAG037730.3	0.285187	[0.07132639; 0.49904697]	0.00895686	0.000911179	0.442423	FEM
NONHSAG076488.2	0.28461	[0.07118171; 0.49803775]	0.00895698	0	0.745754	FEM
NONHSAG093110.1	0.28402	[0.07094902; 0.49709023]	0.00898438	0	0.852716	FEM
NONHSAG050387.2	0.285246	[0.07125503; 0.49923649]	0.00898447	0.139964	0.307261	FEM
NONHSAG026976.2	-0.285504	[-0.49971220; -0.07129512]	0.00899228	0.267817	0.181421	FEM
NONHSAG066592.1	0.284726	[0.07109291; 0.49835814]	0.00899482	0	0.600681	FEM
NONHSAG005908.3	0.285518	[0.07125992; 0.49977535]	0.00900469	0.202495	0.244659	FEM
NONHSAG103326.1	0.285608	[0.07125166; 0.49996489]	0.00901461	0.238917	0.208928	FEM
NONHSAG088255.1	0.28505	[0.07110698; 0.49899402]	0.00901639	0.0641864	0.382378	FEM
NONHSAG036425.3	0.284869	[0.07102069; 0.49871811]	0.00902964	0.0119791	0.432159	FEM
NONHSAG066191.1	0.284375	[0.07080022; 0.49795050]	0.00906109	0	0.617896	FEM
NONHSAG054818.2	0.285332	[0.07103458; 0.49962960]	0.00906233	0.258815	0.189887	FEM
NONHSAG047842.2	-0.284686	[-0.49855055; -0.07082229]	0.009079	0.11149	0.335749	FEM
NONHSAG096269.1	0.285932	[0.07111480; 0.50074911]	0.00908459	0.334643	0.122485	FEM
NONHSAG066905.1	0.284737	[0.07079896; 0.49867549]	0.00909065	0	0.471769	FEM
NONHSAG020133.2	-0.285331	[-0.49978748; -0.07087373]	0.00911419	0.449324	0.0456787	FEM
NONHSAG072686.1	0.28456	[0.07062715; 0.49849318]	0.00913212	0	0.459507	FEM
NONHSAG109373.1	0.285651	[0.07085754; 0.50044508]	0.00914522	0.279003	0.171046	FEM
NONHSAG046105.2	0.814043	[0.20187080; 1.42621462]	0.00915175	0.778595	7.1375e-07	REM
NONHSAG046612.2	0.814043	[0.20187080; 1.42621462]	0.00915175	0.778595	7.1375e-07	REM
NONHSAG017647.3	0.284093	[0.07043153; 0.49775462]	0.00915809	0	0.601069	FEM
NONHSAG100620.1	0.28331	[0.07023530; 0.49638404]	0.00915875	0	0.918071	FEM
NONHSAG089210.1	0.283427	[0.07018538; 0.49666800]	0.00918457	0	0.813919	FEM
NONHSAG000320.2	0.28532	[0.07064130; 0.49999803]	0.00918875	0.400023	0.0741465	FEM
NONHSAG005928.2	0.284038	[0.07030710; 0.49776987]	0.00919431	0.101785	0.345402	FEM
NONHSAG098329.1	0.284801	[0.07048455; 0.49911743]	0.00919799	0.284687	0.165843	FEM
NONHSAG071522.1	0.283561	[0.07016933; 0.49695179]	0.00920069	0	0.798943	FEM
NONHSAG021820.2	-0.284515	[-0.49866437; -0.07036618]	0.00921356	0.313975	0.139859	FEM
NONHSAG079219.1	0.285845	[0.07065801; 0.50103152]	0.0092256	0.464197	0.038581	FEM
NONHSAG100499.1	0.284777	[0.07038527; 0.49916877]	0.00922848	0.34137	0.117026	FEM
NONHSAG057197.1	0.285401	[0.07053852; 0.50026344]	0.00922879	0.400373	0.0739184	FEM
NONHSAG066567.1	0.283349	[0.07002085; 0.49667690]	0.00923224	0	0.619954	FEM
NONHSAG086383.1	0.286507	[0.07070484; 0.50230892]	0.00926361	0.542009	0.0126578	FEM
NONHSAG068618.1	0.283591	[0.06998473; 0.49719639]	0.00926374	0	0.549129	FEM
NONHSAG083289.2	0.282978	[0.06982729; 0.49612791]	0.00926578	0	0.830974	FEM
NONHSAG060230.1	0.286095	[0.07058992; 0.50160088]	0.00926797	0.524791	0.0168461	FEM
NONHSAG006478.2	0.284275	[0.07005833; 0.49849111]	0.00929504	0.412442	0.0662785	FEM
NONHSAG109243.1	0.284363	[0.07007129; 0.49865376]	0.00929789	0.248655	0.199558	FEM
NONHSAG006635.2	0.283911	[0.06994650; 0.49787467]	0.00930232	0.167081	0.280039	FEM
NONHSAG077498.2	0.283167	[0.06966632; 0.49666854]	0.00933444	0	0.609085	FEM
NONHSAG002827.2	0.285227	[0.07014873; 0.50030520]	0.00934242	0.37801	0.089179	FEM
NONHSAG048518.2	-0.283336	[-0.49700210; -0.06967007]	0.00934693	0	0.611975	FEM
NONHSAG048891.2	0.284932	[0.07005954; 0.49980426]	0.0093479	0.409135	0.0683293	FEM
NONHSAG073828.1	0.283238	[0.06960365; 0.49687217]	0.00936095	0	0.495147	FEM
NONHSAG090182.2	0.28572	[0.07013244; 0.50130830]	0.00938769	0.519083	0.0184186	FEM
NONHSAG104993.1	0.283365	[0.06955368; 0.49717689]	0.00938791	0	0.449768	FEM
NONHSAG099949.2	0.282957	[0.06945206; 0.49646259]	0.00938841	0	0.698835	FEM
NONHSAG075461.2	0.28262	[0.06935802; 0.49588198]	0.00939215	0	0.81297	FEM
NONHSAG106124.1	0.282925	[0.06935065; 0.49649844]	0.0094195	0	0.536002	FEM
NONHSAG092968.1	0.28524	[0.06990573; 0.50057401]	0.00942361	0.455699	0.0425504	FEM
NONHSAG048700.2	0.282369	[0.06915640; 0.49558225]	0.00943893	0	0.74883	FEM
NONHSAG013928.2	0.282716	[0.06920022; 0.49623084]	0.00945262	0	0.580254	FEM
NONHSAG023370.2	0.282231	[0.06904581; 0.49541589]	0.00946461	0	0.708506	FEM
NONHSAG048045.2	0.283001	[0.06921923; 0.49678228]	0.0094696	0.140733	0.30649	FEM
NONHSAG075482.2	0.283435	[0.06930619; 0.49756415]	0.00947604	0.158573	0.288579	FEM
NONHSAG015051.2	0.282362	[0.06893613; 0.49578725]	0.00951215	0	0.743686	FEM
NONHSAG096420.1	0.28292	[0.06903888; 0.49680201]	0.00952344	0.0834565	0.363522	FEM
NONHSAG028034.2	0.282175	[0.06880705; 0.49554388]	0.00954029	0	0.462562	FEM
NONHSAG112318.1	0.281828	[0.06871839; 0.49493838]	0.00954165	0	0.802496	FEM
NONHSAG038359.2	0.281793	[0.06869780; 0.49488734]	0.00954565	0	0.881053	FEM
NONHSAG112836.1	0.281575	[0.06860202; 0.49454753]	0.00956007	0	0.906952	FEM
NONHSAG065873.1	0.283001	[0.06886243; 0.49713987]	0.0095894	0.41138	0.0669334	FEM
NONHSAG042882.2	0.284342	[0.06911566; 0.49956904]	0.00961394	0.52303	0.0173211	FEM
NONHSAG038927.2	0.282752	[0.06871746; 0.49678723]	0.0096179	0.284082	0.166394	FEM
NONHSAG049041.2	-0.650178	[-1.14237063; -0.15798541]	0.00962197	0.680027	0.000313649	REM
NONHSAG002996.2	-0.283795	[-0.49871089; -0.06887813]	0.00964911	0.458464	0.0412335	FEM
NONHSAG114204.1	0.281454	[0.06830630; 0.49460223]	0.00965042	0	0.907045	FEM
NONHSAG041480.2	0.281929	[0.06840475; 0.49545351]	0.00965612	0	0.619457	FEM
NONHSAG021701.2	0.282004	[0.06841999; 0.49558714]	0.00965708	0	0.6037	FEM
NONHSAG069544.1	0.282196	[0.06845006; 0.49594154]	0.00966271	0.19883	0.2483	FEM
NONHSAG087850.1	0.283336	[0.06872332; 0.49794901]	0.00966384	0.355852	0.105624	FEM
NONHSAG073674.1	0.283589	[0.06877744; 0.49840088]	0.00966629	0.347809	0.111896	FEM
NONHSAG064910.1	0.281985	[0.06836350; 0.49560675]	0.00967476	0	0.590533	FEM
NONHSAG103190.1	0.283682	[0.06876707; 0.49859791]	0.00967744	0.399682	0.074369	FEM
NONHSAG002574.2	0.283386	[0.06860751; 0.49816354]	0.00970711	0.407146	0.0695779	FEM
NONHSAG027554.3	0.282036	[0.06826149; 0.49580986]	0.00971366	0.166894	0.280226	FEM
NONHSAG059410.1	0.282209	[0.06824921; 0.49616850]	0.00973214	0.083913	0.363073	FEM
NONHSAG091615.1	0.281267	[0.06795362; 0.49458130]	0.0097554	0	0.543564	FEM
NONHSAG065451.1	0.282853	[0.06827212; 0.49743305]	0.00977738	0.287936	0.16289	FEM
NONHSAG022603.2	0.28155	[0.06795287; 0.49514661]	0.00977902	0	0.595778	FEM
NONHSAG079622.1	0.282167	[0.06809917; 0.49623524]	0.00977996	0.108592	0.338634	FEM
NONHSAG115002.1	0.282007	[0.06802094; 0.49599324]	0.00979351	0.0716684	0.375083	FEM
NONHSAG109997.1	0.28395	[0.06848405; 0.49941498]	0.00979536	0.5022	0.0236307	FEM
NONHSAG077579.1	0.28149	[0.06785418; 0.49512652]	0.00980798	0	0.509617	FEM
NONHSAG085112.1	0.282761	[0.06811965; 0.49740149]	0.00982192	0.42546	0.0585268	FEM
NONHSAG014760.3	0.281664	[0.06771997; 0.49560724]	0.00986853	0.0343642	0.411074	FEM
NONHSAG103543.1	0.281385	[0.06762547; 0.49514520]	0.00987805	0.0753997	0.371433	FEM
NONHSAG063607.1	0.280392	[0.06734468; 0.49343995]	0.00989266	0	0.890807	FEM
NONHSAG068275.1	0.279961	[0.06721436; 0.49270695]	0.00990191	0	0.914458	FEM
NONHSAG038296.2	0.283189	[0.06792703; 0.49845187]	0.00992341	0.442922	0.0489499	FEM
NONHSAG004752.2	0.283821	[0.06807147; 0.49957149]	0.00992587	0.509991	0.0211196	FEM
NONHSAG067901.1	0.282777	[0.06782071; 0.49773267]	0.00992593	0.466435	0.0375741	FEM
NONHSAG056035.2	0.281422	[0.06741834; 0.49542665]	0.00995281	0.122937	0.32432	FEM
NONHSAG044756.2	0.282071	[0.06750244; 0.49663972]	0.0099775	0.289454	0.161516	FEM
NONHSAG002642.2	0.282412	[0.06756228; 0.49726107]	0.009985	0.350091	0.1101	FEM
NONHSAG071296.1	0.280773	[0.06715417; 0.49439091]	0.00999057	0	0.499593	FEM
NONHSAG041016.3	0.280426	[0.06694432; 0.49390839]	0.010035	0	0.68109	FEM
NONHSAG072057.1	0.280838	[0.06696678; 0.49470914]	0.0100615	0.2099	0.237323	FEM
NONHSAG093194.1	0.281141	[0.06703336; 0.49524877]	0.0100634	0.275403	0.174366	FEM
NONHSAG071474.1	0.279192	[0.06656206; 0.49182196]	0.0100658	0	0.996297	FEM
NONHSAG052414.2	0.280328	[0.06682241; 0.49383376]	0.0100694	0	0.694918	FEM
NONHSAG027452.2	0.280313	[0.06679330; 0.49383253]	0.0100784	0	0.603702	FEM
NONHSAG087490.1	0.280914	[0.06693379; 0.49489497]	0.0100794	0.0573349	0.389027	FEM
NONHSAG094525.1	0.280205	[0.06675769; 0.49365137]	0.0100818	0	0.507128	FEM
NONHSAG083568.1	0.27914	[0.06650041; 0.49178015]	0.0100831	0	0.988871	FEM
NONHSAG104086.1	0.280619	[0.06683644; 0.49440060]	0.0100888	0.0343714	0.411068	FEM
NONHSAG067738.1	0.279678	[0.06653434; 0.49282123]	0.0101163	0	0.820813	FEM
NONHSAG076667.1	0.28047	[0.06671290; 0.49422762]	0.0101198	0.117916	0.329338	FEM
NONHSAG036487.2	0.281429	[0.06693213; 0.49592623]	0.0101229	0.382497	0.0860061	FEM
NONHSAG067056.1	0.279492	[0.06643508; 0.49254870]	0.0101357	0	0.883133	FEM
NONHSAG064855.1	-0.282146	[-0.49723282; -0.06705939]	0.010138	0.474926	0.033899	FEM
NONHSAG007643.3	0.280819	[0.06671817; 0.49492041]	0.0101471	0.246582	0.201545	FEM
NONHSAG041256.2	0.280121	[0.06654305; 0.49369974]	0.0101504	0	0.64027	FEM
NONHSAG024462.2	-0.603409	[-1.06350781; -0.14331041]	0.0101553	0.632269	0.00163512	REM
NONHSAG090996.1	0.281119	[0.06675596; 0.49548119]	0.0101588	0.296629	0.155072	FEM
NONHSAG062960.1	0.280342	[0.06656185; 0.49412313]	0.0101623	0.0729291	0.373851	FEM
NONHSAG056664.1	0.279237	[0.06613023; 0.49234279]	0.0102223	0	0.85536	FEM
NONHSAG093363.1	0.280812	[0.06646003; 0.49516349]	0.0102376	0.271348	0.178127	FEM
NONHSAG040856.2	0.281532	[0.06658678; 0.49647720]	0.010253	0.395676	0.0770067	FEM
NONHSAG114448.1	0.279927	[0.06619289; 0.49366028]	0.010258	0	0.489037	FEM
NONHSAG102236.1	0.279214	[0.06594510; 0.49248338]	0.0102863	0	0.829857	FEM
NONHSAG067119.1	0.279095	[0.06586090; 0.49232982]	0.0103064	0	0.741203	FEM
NONHSAG110803.1	0.27944	[0.06593654; 0.49294275]	0.0103084	0	0.639554	FEM
NONHSAG051369.2	0.279935	[0.06604713; 0.49382281]	0.0103106	0.236432	0.211333	FEM
NONHSAG023681.2	0.281321	[0.06631996; 0.49632146]	0.0103298	0.453026	0.0438462	FEM
NONHSAG019544.2	0.279592	[0.06590565; 0.49327868]	0.0103322	0	0.569353	FEM
NONHSAG001754.2	0.278998	[0.06574365; 0.49225318]	0.0103401	0	0.687154	FEM
NONHSAG003747.2	0.281604	[0.06631731; 0.49689025]	0.0103544	0.494711	0.0262191	FEM
NONHSAG076576.1	0.278432	[0.06548233; 0.49138131]	0.0103861	0	0.942048	FEM
NONHSAG036059.2	0.279152	[0.06560092; 0.49270256]	0.0104043	0	0.658267	FEM
NONHSAG059345.2	0.280428	[0.06588997; 0.49496603]	0.0104082	0.264658	0.18438	FEM
NONHSAG057748.1	0.279822	[0.06573145; 0.49391326]	0.010414	0.296253	0.155407	FEM
NONHSAG051705.2	0.279167	[0.06557450; 0.49275969]	0.0104151	0	0.458706	FEM
NONHSAG088980.1	0.279457	[0.06562613; 0.49328702]	0.010421	0.151933	0.295247	FEM
NONHSAG025201.2	0.27823	[0.06530572; 0.49115456]	0.0104327	0	0.866783	FEM
NONHSAG014655.2	-0.279777	[-0.49391694; -0.06563720]	0.010444	0.202392	0.244761	FEM
NONHSAG007927.2	0.279612	[0.06557076; 0.49365268]	0.010454	0.241718	0.206223	FEM
NONHSAG020252.3	0.279824	[0.06561315; 0.49403524]	0.0104567	0.17604	0.271057	FEM
NONHSAG080016.1	0.279154	[0.06545553; 0.49285198]	0.0104568	0.0259452	0.419053	FEM
NONHSAG032664.3	0.28066	[0.06580483; 0.49551491]	0.0104582	0.384084	0.0848966	FEM
NONHSAG015990.2	0.281225	[0.06592617; 0.49652415]	0.0104622	0.543482	0.0123369	FEM
NONHSAG068897.1	0.279804	[0.06558369; 0.49402494]	0.0104656	0.183194	0.263896	FEM
NONHSAG086448.1	0.280262	[0.06567602; 0.49484783]	0.0104709	0.383353	0.0854068	FEM
NONHSAG010307.2	0.279291	[0.06543985; 0.49314301]	0.0104741	0.142284	0.304933	FEM
NONHSAG089190.1	0.278012	[0.06513118; 0.49089304]	0.0104773	0	0.903987	FEM
NONHSAG042576.2	0.280721	[0.06573799; 0.49570325]	0.0104873	0.499319	0.024606	FEM
NONHSAG103678.2	0.278444	[0.06519299; 0.49169447]	0.0104916	0	0.734046	FEM
NONHSAG108016.1	0.279992	[0.06553987; 0.49444479]	0.0104972	0.308042	0.145001	FEM
NONHSAG066574.1	0.278366	[0.06512071; 0.49161122]	0.0105112	0	0.753798	FEM
NONHSAG114004.1	0.279817	[0.06544723; 0.49418584]	0.0105158	0.30126	0.150958	FEM
NONHSAG110093.1	0.280022	[0.06545917; 0.49458415]	0.0105288	0.334362	0.122715	FEM
NONHSAG051427.2	-0.277895	[-0.49083348; -0.06495559]	0.0105311	0	0.827604	FEM
NONHSAG109940.1	0.280807	[0.06562050; 0.49599325]	0.0105368	0.443757	0.0485156	FEM
NONHSAG086732.1	0.27925	[0.06517954; 0.49332020]	0.0105647	0.184353	0.262737	FEM
NONHSAG010265.2	0.278346	[0.06496122; 0.49173087]	0.0105674	0	0.648209	FEM
NONHSAG067927.1	0.280821	[0.06547491; 0.49616712]	0.0105905	0.474117	0.0342391	FEM
NONHSAG035865.2	0.27924	[0.06503746; 0.49344281]	0.0106155	0.281746	0.168529	FEM
NONHSAG087805.1	0.27849	[0.06486108; 0.49211814]	0.0106161	0.00356045	0.439976	FEM
NONHSAG085542.2	0.27765	[0.06460373; 0.49069694]	0.0106388	0	0.864102	FEM
NONHSAG080548.1	0.277845	[0.06463821; 0.49105193]	0.0106427	0	0.797215	FEM
NONHSAG085921.1	0.278232	[0.06471529; 0.49174813]	0.0106474	0	0.699763	FEM
NONHSAG000922.2	-0.280364	[-0.49553510; -0.06519320]	0.010654	0.530256	0.015428	FEM
NONHSAG090023.1	0.27907	[0.06486478; 0.49327610]	0.0106641	0.202016	0.245134	FEM
NONHSAG066200.1	0.278677	[0.06474404; 0.49261038]	0.0106748	0.264384	0.184638	FEM
NONHSAG092162.1	0.278792	[0.06476687; 0.49281804]	0.0106762	0.267757	0.181477	FEM
NONHSAG055151.2	0.278251	[0.06463471; 0.49186813]	0.0106786	0	0.655004	FEM
NONHSAG113504.1	0.55038	[0.12780974; 0.97294975]	0.0106855	0.558609	0.0093619	REM
NONHSAG031724.2	0.277583	[0.06444981; 0.49071658]	0.0106895	0	0.848798	FEM
NONHSAG023592.2	0.277842	[0.06449314; 0.49119078]	0.0106957	0	0.76124	FEM
NONHSAG007383.2	0.277339	[0.06436440; 0.49031272]	0.0107	0	0.896038	FEM
NONHSAG083772.1	0.28042	[0.06506796; 0.49577142]	0.0107042	0.474501	0.0340775	FEM
NONHSAG084968.1	0.277262	[0.06432490; 0.49019905]	0.010708	0	0.770897	FEM
NONHSAG027026.2	0.278542	[0.06458333; 0.49250158]	0.0107222	0.13031	0.316941	FEM
NONHSAG095325.1	0.279443	[0.06477119; 0.49411412]	0.0107299	0.3512	0.109233	FEM
NONHSAG067578.1	0.277863	[0.06438965; 0.49133668]	0.0107355	0	0.503518	FEM
NONHSAG076359.1	0.277516	[0.06430802; 0.49072317]	0.0107359	0	0.88941	FEM
NONHSAG060594.1	0.278044	[0.06441226; 0.49167574]	0.0107426	0.0916264	0.355465	FEM
NONHSAG071793.1	0.614399	[0.14228427; 1.08651473]	0.0107508	0.649684	0.000951295	REM
NONHSAG071170.1	0.278499	[0.06446031; 0.49253838]	0.0107638	0.207214	0.239981	FEM
NONHSAG062459.1	0.278533	[0.06446613; 0.49259913]	0.0107644	0.225408	0.222069	FEM
NONHSAG093596.1	0.278163	[0.06436531; 0.49195978]	0.01077	0.0733738	0.373416	FEM
NONHSAG067962.1	0.279077	[0.06457102; 0.49358362]	0.0107722	0.406149	0.0702088	FEM
NONHSAG013410.2	0.277929	[0.06428324; 0.49157399]	0.0107803	0	0.489342	FEM
NONHSAG063908.1	0.278151	[0.06431921; 0.49198348]	0.0107861	0.242067	0.205887	FEM
NONHSAG060496.1	0.278515	[0.06440144; 0.49262819]	0.0107867	0.390293	0.0806237	FEM
NONHSAG104363.1	0.278304	[0.06435210; 0.49225632]	0.010787	0.04374	0.402123	FEM
NONHSAG048071.2	0.278643	[0.06441057; 0.49287477]	0.0107943	0.265124	0.183943	FEM
NONHSAG059134.1	0.27876	[0.06433424; 0.49318674]	0.0108324	0.216226	0.231082	FEM
NONHSAG081583.2	0.278404	[0.06424973; 0.49255869]	0.0108333	0.252035	0.196328	FEM
NONHSAG081694.1	0.276813	[0.06387148; 0.48975416]	0.0108374	0	0.9424	FEM
NONHSAG032760.3	0.277339	[0.06395945; 0.49071813]	0.0108498	0	0.621092	FEM
NONHSAG024576.2	0.279729	[0.06448178; 0.49497711]	0.0108604	0.424376	0.0591526	FEM
NONHSAG042609.2	0.27962	[0.06443501; 0.49480470]	0.0108684	0.448555	0.0460648	FEM
NONHSAG073964.1	0.27672	[0.06375834; 0.48968158]	0.0108715	0	0.954442	FEM
NONHSAG046518.2	-0.277839	[-0.49166690; -0.06401156]	0.0108732	0.212263	0.234989	FEM
NONHSAG024608.2	0.279211	[0.06431972; 0.49410170]	0.0108761	0.426102	0.0581581	FEM
NONHSAG100756.1	0.278493	[0.06408771; 0.49289817]	0.0109008	0.324207	0.131149	FEM
NONHSAG058524.1	0.277026	[0.06369401; 0.49035851]	0.0109218	0	0.716267	FEM
NONHSAG030078.2	0.276501	[0.06357244; 0.48942893]	0.010922	0	0.943134	FEM
NONHSAG041970.2	0.278625	[0.06403588; 0.49321339]	0.0109313	0.391112	0.0800684	FEM
NONHSAG112539.1	0.279423	[0.06421883; 0.49462682]	0.0109315	0.548152	0.0113566	FEM
NONHSAG094711.2	0.279048	[0.06407151; 0.49402394]	0.0109541	0.537317	0.0137188	FEM
NONHSAG108395.1	0.277211	[0.06362479; 0.49079809]	0.0109635	0	0.502475	FEM
NONHSAG030656.2	0.278068	[0.06380856; 0.49232728]	0.0109683	0.273396	0.176225	FEM
NONHSAG108166.1	0.277405	[0.06364616; 0.49116405]	0.0109721	0.00353184	0.440003	FEM
NONHSAG069829.1	0.276317	[0.06339022; 0.48924471]	0.0109745	0	0.93185	FEM
NONHSAG067313.2	0.279028	[0.06398332; 0.49407335]	0.0109852	0.378162	0.0890705	FEM
NONHSAG113792.1	0.279174	[0.06398715; 0.49436062]	0.0109962	0.475253	0.033762	FEM
NONHSAG090335.1	0.275845	[0.06319497; 0.48849498]	0.0110072	0	0.991933	FEM
NONHSAG061679.1	0.277685	[0.06360345; 0.49176699]	0.0110121	0.144526	0.302683	FEM
NONHSAG111622.1	0.277374	[0.06350856; 0.49124004]	0.011021	0	0.445732	FEM
NONHSAG037150.2	-0.277797	[-0.49199946; -0.06359440]	0.0110251	0.138323	0.308908	FEM
NONHSAG047238.2	0.278283	[0.06367005; 0.49289659]	0.0110384	0.397368	0.0758868	FEM
NONHSAG060659.1	0.27657	[0.06325383; 0.48988634]	0.0110476	0	0.583269	FEM
NONHSAG082816.1	0.278329	[0.06361921; 0.49303882]	0.0110614	0.341386	0.117013	FEM
NONHSAG052418.2	0.276285	[0.06312248; 0.48944827]	0.0110725	0	0.828362	FEM
NONHSAG092688.1	0.27728	[0.06331302; 0.49124744]	0.0110864	0.168586	0.278529	FEM
NONHSAG104238.1	0.27692	[0.06321974; 0.49062109]	0.0110905	0.129209	0.318043	FEM
NONHSAG085510.1	0.275642	[0.06291740; 0.48836691]	0.0110945	0	0.943211	FEM
NONHSAG098011.1	0.278319	[0.06351167; 0.49312655]	0.0111008	0.413407	0.0656865	FEM
NONHSAG092726.1	0.276124	[0.06300048; 0.48924790]	0.0111047	0	0.871054	FEM
NONHSAG036647.3	0.276503	[0.06306222; 0.48994356]	0.011114	0	0.531537	FEM
NONHSAG092377.1	0.276497	[0.06304353; 0.48995072]	0.0111206	0	0.515112	FEM
NONHSAG082461.1	0.278847	[0.06355968; 0.49413502]	0.011128	0.518039	0.0187162	FEM
NONHSAG038529.2	-0.277755	[-0.49222903; -0.06328022]	0.0111394	0.332155	0.12453	FEM
NONHSAG085491.1	0.277165	[0.06313845; 0.49119171]	0.0111423	0.170745	0.276364	FEM
NONHSAG046156.2	-0.27828	[-0.49323702; -0.06332230]	0.0111686	0.437332	0.0519121	FEM
NONHSAG081111.1	0.278278	[0.06326516; 0.49329022]	0.01119	0.492088	0.0271668	FEM
NONHSAG057811.1	0.277251	[0.06301972; 0.49148318]	0.0111946	0.211132	0.236106	FEM
NONHSAG070524.1	0.276971	[0.06294181; 0.49100058]	0.0112	0.0821757	0.364782	FEM
NONHSAG009880.2	0.275737	[0.06262916; 0.48884577]	0.0112123	0	0.848008	FEM
NONHSAG110375.1	0.275566	[0.06256796; 0.48856472]	0.0112208	0	0.870851	FEM
NONHSAG028390.3	0.277256	[0.06294379; 0.49156879]	0.0112238	0.172276	0.274829	FEM
NONHSAG114527.1	0.277932	[0.06307954; 0.49278522]	0.0112305	0.442914	0.0489539	FEM
NONHSAG019269.2	0.275473	[0.06247297; 0.48847361]	0.011249	0	0.911991	FEM
NONHSAG022672.2	0.276001	[0.06253684; 0.48946499]	0.0112703	0	0.780889	FEM
NONHSAG024871.2	0.275317	[0.06236153; 0.48827343]	0.0112781	0	0.916756	FEM
NONHSAG031183.2	0.27799	[0.06293592; 0.49304477]	0.0112899	0.432145	0.054748	FEM
NONHSAG115156.1	0.276395	[0.06255460; 0.49023630]	0.0112976	0	0.445884	FEM
NONHSAG012422.2	-0.27692	[-0.49118272; -0.06265683]	0.0113039	0.238601	0.209233	FEM
NONHSAG107919.1	0.276697	[0.06257403; 0.49081960]	0.0113162	0.208626	0.238583	FEM
NONHSAG015436.2	-0.276143	[-0.48983843; -0.06244706]	0.0113169	0.120399	0.326858	FEM
NONHSAG072311.1	0.276649	[0.06255166; 0.49074587]	0.0113206	0.118697	0.328557	FEM
NONHSAG074361.1	0.274898	[0.06214201; 0.48765318]	0.0113259	0	0.966483	FEM
NONHSAG012756.2	0.275668	[0.06228607; 0.48905026]	0.0113374	0	0.701608	FEM
NONHSAG074529.1	0.275666	[0.06226162; 0.48907115]	0.0113467	0	0.720217	FEM
NONHSAG022030.2	-0.275945	[-0.48960474; -0.06228464]	0.011362	0	0.533102	FEM
NONHSAG105505.1	0.275967	[0.06228945; 0.48964376]	0.011362	0	0.643326	FEM
NONHSAG113737.1	0.278261	[0.06278946; 0.49373202]	0.0113688	0.521511	0.0177382	FEM
NONHSAG018565.2	0.277123	[0.06249685; 0.49174852]	0.0113825	0.352047	0.108571	FEM
NONHSAG083288.1	0.275429	[0.06206106; 0.48879655]	0.0114032	0	0.790765	FEM
NONHSAG066959.1	0.277114	[0.06233517; 0.49189237]	0.0114437	0.471908	0.0351787	FEM
NONHSAG093560.1	0.276279	[0.06214057; 0.49041837]	0.0114463	0.258201	0.190469	FEM
NONHSAG088307.1	0.276937	[0.06222819; 0.49164664]	0.0114695	0.400035	0.0741388	FEM
NONHSAG099256.1	0.278028	[0.06243518; 0.49362142]	0.0114842	0.545247	0.0119597	FEM
NONHSAG108858.1	0.275596	[0.06186100; 0.48933070]	0.011495	0	0.571059	FEM
NONHSAG104803.1	-0.276199	[-0.49046629; -0.06193124]	0.0115201	0.408552	0.0686939	FEM
NONHSAG112271.1	0.27612	[0.06189214; 0.49034775]	0.0115284	0.306937	0.145966	FEM
NONHSAG084598.1	0.276654	[0.06201075; 0.49129721]	0.0115288	0.396767	0.0762835	FEM
NONHSAG026881.2	0.275869	[0.06172693; 0.49001197]	0.0115707	0.26649	0.182663	FEM
NONHSAG032350.2	0.275245	[0.06157579; 0.48891472]	0.0115752	0	0.521656	FEM
NONHSAG085126.1	0.275769	[0.06165492; 0.48988379]	0.01159	0.132242	0.315004	FEM
NONHSAG066751.1	0.277047	[0.06193808; 0.49215538]	0.0115909	0.470651	0.0357207	FEM
NONHSAG036905.2	0.273662	[0.06114484; 0.48617914]	0.0116052	0	0.993939	FEM
NONHSAG090040.1	0.275877	[0.06159831; 0.49015588]	0.0116214	0.307037	0.145878	FEM
NONHSAG021333.3	0.275988	[0.06157422; 0.49040205]	0.0116404	0.25525	0.193268	FEM
NONHSAG094418.1	0.274404	[0.06121498; 0.48759324]	0.0116427	0	0.846717	FEM
NONHSAG069570.1	0.274165	[0.06114844; 0.48718197]	0.0116479	0	0.851294	FEM
NONHSAG043569.2	0.277046	[0.06177791; 0.49231468]	0.011653	0.440908	0.0500056	FEM
NONHSAG085030.1	0.274315	[0.06115643; 0.48747386]	0.0116579	0	0.808962	FEM
NONHSAG076828.1	0.274571	[0.06118936; 0.48795278]	0.0116673	0	0.685168	FEM
NONHSAG056816.1	0.27557	[0.06138932; 0.48975047]	0.0116762	0.257393	0.191234	FEM
NONHSAG090796.1	0.274178	[0.06107608; 0.48727937]	0.0116774	0	0.834643	FEM
NONHSAG071809.1	0.275837	[0.06143956; 0.49023361]	0.0116797	0.373086	0.0927238	FEM
NONHSAG104234.1	0.275781	[0.06142034; 0.49014151]	0.0116824	0.216544	0.230768	FEM
NONHSAG027666.2	0.276595	[0.06158879; 0.49160084]	0.0116874	0.427226	0.0575154	FEM
NONHSAG008358.3	0.275914	[0.06140701; 0.49042042]	0.0116992	0.252354	0.196024	FEM
NONHSAG076036.1	0.274225	[0.06099652; 0.48745392]	0.0117128	0	0.828711	FEM
NONHSAG112710.1	0.274952	[0.06114402; 0.48876066]	0.0117184	0.0770421	0.369823	FEM
NONHSAG093743.1	0.276852	[0.06153913; 0.49216475]	0.0117291	0.491832	0.0272604	FEM
NONHSAG104517.1	0.274133	[0.06089666; 0.48737034]	0.0117441	0	0.694392	FEM
NONHSAG060011.1	0.276451	[0.06139774; 0.49150489]	0.0117495	0.47198	0.035148	FEM
NONHSAG060433.1	-0.274834	[-0.48863099; -0.06103722]	0.01175	0.0518116	0.394364	FEM
NONHSAG034595.2	-0.275213	[-0.48930572; -0.06112067]	0.0117503	0.123483	0.323774	FEM
NONHSAG091947.2	0.274776	[0.06095911; 0.48859236]	0.0117757	0.0957564	0.35138	FEM
NONHSAG013177.2	-0.275222	[-0.48939357; -0.06105130]	0.0117784	0.181956	0.265134	FEM
NONHSAG097121.1	0.274491	[0.06087233; 0.48811032]	0.011785	0.0472816	0.398724	FEM
NONHSAG003449.2	-0.27654	[-0.49176628; -0.06131343]	0.0117902	0.480494	0.0316127	FEM
NONHSAG099361.1	0.275001	[0.06094504; 0.48905730]	0.0118009	0.0896302	0.357437	FEM
NONHSAG107907.1	-0.275618	[-0.49017871; -0.06105649]	0.0118108	0.293321	0.158032	FEM
NONHSAG013345.2	0.273459	[0.06056897; 0.48634808]	0.0118145	0	0.892234	FEM
NONHSAG111535.1	0.274933	[0.06089207; 0.48897345]	0.0118158	0.196951	0.250169	FEM
NONHSAG102638.1	0.274065	[0.06066991; 0.48746029]	0.0118277	0	0.688851	FEM
NONHSAG040007.2	0.274012	[0.06062726; 0.48739664]	0.01184	0	0.647117	FEM
NONHSAG037010.2	0.273602	[0.06051641; 0.48668726]	0.0118479	0	0.825106	FEM
NONHSAG018128.2	0.274933	[0.06077590; 0.48909053]	0.0118618	0.247612	0.200557	FEM
NONHSAG030478.2	0.273292	[0.06037565; 0.48620803]	0.0118767	0	0.895591	FEM
NONHSAG076293.1	0.275788	[0.06088385; 0.49069199]	0.0118937	0.522724	0.0174048	FEM
NONHSAG074915.1	0.273496	[0.06032130; 0.48667015]	0.0119162	0	0.872081	FEM
NONHSAG020138.2	0.274334	[0.06050083; 0.48816640]	0.0119183	0.0163974	0.428031	FEM
NONHSAG011743.2	0.273261	[0.06008833; 0.48643370]	0.0119887	0	0.827527	FEM
NONHSAG087622.1	0.272391	[0.05984085; 0.48494138]	0.0120113	0	0.984998	FEM
NONHSAG043300.3	0.274471	[0.06026935; 0.48867252]	0.0120226	0.285927	0.164713	FEM
NONHSAG009237.2	0.273284	[0.05999986; 0.48656740]	0.0120261	0	0.732145	FEM
NONHSAG111080.1	0.276005	[0.06053970; 0.49147107]	0.0120491	0.492709	0.0269405	FEM
NONHSAG037716.2	0.272938	[0.05985734; 0.48601896]	0.0120529	0	0.813768	FEM
NONHSAG051063.2	0.274997	[0.06030045; 0.48969420]	0.0120563	0.446926	0.0468887	FEM
NONHSAG085987.1	0.276143	[0.06052802; 0.49175834]	0.0120657	0.537486	0.0136794	FEM
NONHSAG036738.2	0.275086	[0.06027797; 0.48989320]	0.012073	0.352829	0.107963	FEM
NONHSAG103827.2	0.274927	[0.06023908; 0.48961394]	0.0120746	0.415452	0.0644404	FEM
NONHSAG068772.1	0.27466	[0.06016730; 0.48915221]	0.01208	0.395681	0.0770036	FEM
NONHSAG096441.1	0.272385	[0.05965228; 0.48511681]	0.0120867	0	0.978285	FEM
NONHSAG067767.1	0.27321	[0.05983006; 0.48658962]	0.0120879	0	0.629395	FEM
NONHSAG081025.1	0.273576	[0.05980681; 0.48734557]	0.0121295	0	0.499188	FEM
NONHSAG105395.1	0.272187	[0.05948291; 0.48489065]	0.0121377	0	0.978285	FEM
NONHSAG076068.1	0.27315	[0.05965709; 0.48664314]	0.0121523	0	0.58497	FEM
NONHSAG037364.2	-0.273912	[-0.48800525; -0.05981844]	0.0121544	0.145649	0.301556	FEM
NONHSAG023608.2	0.275038	[0.06005273; 0.49002356]	0.012159	0.447555	0.0465696	FEM
NONHSAG076646.1	0.273878	[0.05979842; 0.48795808]	0.0121595	0.152707	0.294469	FEM
NONHSAG063703.1	0.272919	[0.05957355; 0.48626457]	0.0121657	0	0.688336	FEM
NONHSAG097422.1	0.275121	[0.06001519; 0.49022778]	0.0121814	0.455499	0.0426464	FEM
NONHSAG034519.2	0.274403	[0.05985281; 0.48895348]	0.0121837	0.362266	0.100735	FEM
NONHSAG048871.2	0.273149	[0.05957318; 0.48672532]	0.0121862	0	0.507867	FEM
NONHSAG099992.2	0.272898	[0.05950486; 0.48629183]	0.0121917	0	0.68992	FEM
NONHSAG105888.1	0.272956	[0.05951496; 0.48639796]	0.0121927	0	0.633149	FEM
NONHSAG012335.2	0.274383	[0.05981019; 0.48895604]	0.0121991	0.30231	0.15003	FEM
NONHSAG055506.3	0.274286	[0.05976773; 0.48880403]	0.0122077	0.27929	0.170782	FEM
NONHSAG110438.1	0.273015	[0.05948993; 0.48653993]	0.012208	0	0.559937	FEM
NONHSAG023311.2	0.274424	[0.05976825; 0.48907942]	0.0122196	0.367145	0.0970854	FEM
NONHSAG003934.2	-0.275594	[-0.49116562; -0.06002153]	0.0122202	0.536719	0.0138581	FEM
NONHSAG040100.2	0.273174	[0.05945328; 0.48689424]	0.0122369	0.0228266	0.421994	FEM
NONHSAG066655.1	0.273852	[0.05958000; 0.48812435]	0.0122454	0.252586	0.195803	FEM
NONHSAG061420.1	0.272872	[0.05934045; 0.48640305]	0.0122561	0	0.602713	FEM
NONHSAG060288.1	0.273417	[0.05943998; 0.48739370]	0.0122638	0.182348	0.264742	FEM
NONHSAG104059.1	0.272456	[0.05919977; 0.48571232]	0.0122765	0	0.863544	FEM
NONHSAG011168.2	0.274066	[0.05954775; 0.48858404]	0.0122773	0.27086	0.178582	FEM
NONHSAG012797.2	0.2742	[0.05953629; 0.48886406]	0.0122937	0.4083	0.0688518	FEM
NONHSAG037628.2	0.272184	[0.05908826; 0.48527908]	0.0122979	0	0.723822	FEM
NONHSAG058250.1	0.272351	[0.05903462; 0.48566689]	0.0123346	0	0.575659	FEM
NONHSAG011211.3	0.272724	[0.05906547; 0.48638310]	0.0123551	0	0.521602	FEM
NONHSAG084039.1	0.274203	[0.05938265; 0.48902315]	0.0123563	0.397214	0.0759885	FEM
NONHSAG087040.1	0.273693	[0.05926498; 0.48812171]	0.0123593	0.412567	0.0662018	FEM
NONHSAG092894.1	0.272725	[0.05905373; 0.48639726]	0.01236	0	0.515519	FEM
NONHSAG099240.2	0.272852	[0.05902946; 0.48667404]	0.0123811	0.231069	0.216544	FEM
NONHSAG053845.2	-0.274045	[-0.48883915; -0.05925094]	0.012396	0.451344	0.0446731	FEM
NONHSAG067251.1	0.27362	[0.05914061; 0.48809940]	0.0124035	0.327949	0.128017	FEM
NONHSAG099915.1	0.273378	[0.05908300; 0.48767396]	0.0124057	0.423032	0.0599332	FEM
NONHSAG047805.3	0.274822	[0.05937815; 0.49026617]	0.0124126	0.473374	0.0345537	FEM
NONHSAG069008.1	0.272236	[0.05878930; 0.48568257]	0.0124249	0	0.598459	FEM
NONHSAG043563.2	0.275181	[0.05938157; 0.49098108]	0.0124427	0.53671	0.0138602	FEM
NONHSAG081934.1	0.272148	[0.05868424; 0.48561106]	0.0124603	0	0.476439	FEM
NONHSAG030634.2	0.272695	[0.05879975; 0.48658986]	0.0124613	0.181632	0.265458	FEM
NONHSAG077256.1	0.273794	[0.05901697; 0.48857021]	0.0124694	0.363595	0.0997346	FEM
NONHSAG060903.1	0.272319	[0.05867626; 0.48596270]	0.0124788	0.145994	0.30121	FEM
NONHSAG084444.2	0.27403	[0.05903622; 0.48902331]	0.0124823	0.405291	0.0707533	FEM
NONHSAG110666.1	0.273004	[0.05879917; 0.48720875]	0.0124889	0.195327	0.251786	FEM
NONHSAG114789.1	0.273664	[0.05892106; 0.48840646]	0.0124972	0.351288	0.109164	FEM
NONHSAG090164.1	0.272072	[0.05854808; 0.48559564]	0.0125097	0	0.642115	FEM
NONHSAG077175.1	-0.272085	[-0.48564017; -0.05852905]	0.0125187	0	0.606157	FEM
NONHSAG088192.1	-0.273779	[-0.48868683; -0.05887164]	0.0125277	0.413874	0.0654009	FEM
NONHSAG071677.1	0.27159	[0.05833192; 0.48484845]	0.0125563	0	0.67475	FEM
NONHSAG103699.1	0.271787	[0.05836174; 0.48521250]	0.0125614	0	0.578481	FEM
NONHSAG017514.2	-0.569414	[-1.01656373; -0.12226348]	0.0125631	0.610629	0.00296299	REM
NONHSAG029725.2	0.272261	[0.05844458; 0.48607764]	0.0125693	0.092315	0.354784	FEM
NONHSAG055797.2	-0.2739	[-0.48901424; -0.05878632]	0.0125734	0.459566	0.0407154	FEM
NONHSAG106062.1	0.271741	[0.05830578; 0.48517580]	0.0125805	0	0.669006	FEM
NONHSAG108819.1	-0.272931	[-0.48731073; -0.05855166]	0.0125844	0.318509	0.135974	FEM
NONHSAG084657.1	0.272371	[0.05839249; 0.48634855]	0.0126005	0.0216821	0.423071	FEM
NONHSAG087757.1	0.272096	[0.05831733; 0.48587409]	0.0126073	0	0.444769	FEM
NONHSAG068814.1	0.271817	[0.05823887; 0.48539430]	0.012615	0.0318216	0.41349	FEM
NONHSAG110468.1	-0.681518	[-1.21709948; -0.14593555]	0.0126291	0.727326	3.12717e-05	REM
NONHSAG052457.2	0.27311	[0.05848010; 0.48774030]	0.0126298	0.363511	0.0997981	FEM
NONHSAG088527.2	0.2727	[0.05836316; 0.48703660]	0.0126419	0.227787	0.219744	FEM
NONHSAG040276.2	0.271375	[0.05806215; 0.48468877]	0.0126492	0	0.609474	FEM
NONHSAG001191.3	0.273327	[0.05844159; 0.48821148]	0.0126649	0.368987	0.0957233	FEM
NONHSAG010226.2	0.273372	[0.05839712; 0.48834613]	0.0126873	0.425225	0.058662	FEM
NONHSAG052858.2	0.271	[0.05787255; 0.48412753]	0.0126948	0	0.741582	FEM
NONHSAG089754.1	0.271537	[0.05797366; 0.48510103]	0.0127005	0	0.506263	FEM
NONHSAG007696.3	0.273013	[0.05827316; 0.48775296]	0.012707	0.364328	0.0991847	FEM
NONHSAG032560.3	0.273382	[0.05834003; 0.48842313]	0.0127119	0.414904	0.064773	FEM
NONHSAG025677.2	-0.272892	[-0.48755169; -0.05823317]	0.0127129	0.378779	0.0886313	FEM
NONHSAG040447.2	0.272818	[0.05817082; 0.48746472]	0.0127322	0.426216	0.0580924	FEM
NONHSAG014929.3	0.271926	[0.05797766; 0.48587371]	0.0127334	0.243874	0.204147	FEM
NONHSAG024003.2	0.272257	[0.05801846; 0.48649478]	0.0127458	0.181979	0.26511	FEM
NONHSAG073330.1	0.272588	[0.05807558; 0.48710122]	0.0127515	0.279251	0.170819	FEM
NONHSAG088512.2	0.27314	[0.05818950; 0.48808975]	0.0127529	0.517055	0.0189999	FEM
NONHSAG070149.1	0.272266	[0.05797911; 0.48655332]	0.0127631	0.308266	0.144806	FEM
NONHSAG108474.1	0.272886	[0.05810161; 0.48767074]	0.0127671	0.466114	0.0377178	FEM
NONHSAG005833.2	0.273523	[0.05817217; 0.48887449]	0.0127941	0.515296	0.0195139	FEM
NONHSAG099259.1	0.271322	[0.05769451; 0.48494874]	0.0127981	0	0.508618	FEM
NONHSAG072642.1	0.271052	[0.05759678; 0.48450811]	0.0128151	0	0.691567	FEM
NONHSAG002708.2	0.271986	[0.05774189; 0.48623060]	0.0128374	0.392143	0.0793714	FEM
NONHSAG011686.3	0.27264	[0.05787521; 0.48740472]	0.0128397	0.447122	0.0467892	FEM
NONHSAG043947.2	0.271104	[0.05749280; 0.48471493]	0.0128634	0.0992057	0.347961	FEM
NONHSAG018080.2	-0.271664	[-0.48571965; -0.05760816]	0.0128649	0.175201	0.271897	FEM
NONHSAG049718.2	0.273133	[0.05791437; 0.48835146]	0.0128671	0.51074	0.0208879	FEM
NONHSAG048805.2	0.272431	[0.05774538; 0.48711713]	0.0128755	0.463176	0.0390461	FEM
NONHSAG042344.2	-0.27191	[-0.48624801; -0.05757178]	0.0129021	0.298759	0.153175	FEM
NONHSAG099328.1	0.272079	[0.05759798; 0.48655981]	0.0129061	0.312829	0.140847	FEM
NONHSAG069348.2	0.270108	[0.05717637; 0.48303874]	0.0129079	0	0.83141	FEM
NONHSAG075080.1	0.272134	[0.05760481; 0.48666235]	0.0129081	0.459887	0.0405652	FEM
NONHSAG038978.3	0.270907	[0.05734072; 0.48447390]	0.01291	0	0.594904	FEM
NONHSAG101348.1	0.27034	[0.05720812; 0.48347185]	0.0129153	0	0.85091	FEM
NONHSAG110780.1	0.271587	[0.05745940; 0.48571433]	0.0129206	0.307845	0.145173	FEM
NONHSAG104781.1	0.270926	[0.05729693; 0.48455533]	0.0129302	0	0.493406	FEM
NONHSAG073708.1	-0.270907	[-0.48462769; -0.05718535]	0.0129756	0.181388	0.265702	FEM
NONHSAG021740.2	0.271464	[0.05729914; 0.48562802]	0.0129773	0.306434	0.146406	FEM
NONHSAG086754.1	0.270206	[0.05701979; 0.48339130]	0.0129831	0	0.803759	FEM
NONHSAG062215.1	0.272305	[0.05741259; 0.48719701]	0.0130043	0.382215	0.0862037	FEM
NONHSAG104142.1	0.27082	[0.05707214; 0.48456825]	0.0130159	0	0.451413	FEM
NONHSAG059662.1	0.270709	[0.05703547; 0.48438264]	0.0130216	0	0.473189	FEM
NONHSAG033639.2	0.270576	[0.05699795; 0.48415438]	0.0130256	0	0.554344	FEM
NONHSAG090394.1	0.270962	[0.05707520; 0.48484939]	0.0130274	0.042066	0.403726	FEM
NONHSAG060561.1	-0.270731	[-0.48444215; -0.05701941]	0.0130303	0.152341	0.294837	FEM
NONHSAG060629.1	0.272746	[0.05740486; 0.48808691]	0.0130468	0.476183	0.0333742	FEM
NONHSAG089609.1	0.272623	[0.05736841; 0.48787668]	0.0130512	0.46892	0.0364747	FEM
NONHSAG060806.1	0.271077	[0.05703237; 0.48512118]	0.0130558	0.120043	0.327213	FEM
NONHSAG089262.1	0.271483	[0.05711463; 0.48585044]	0.0130571	0.327611	0.128298	FEM
NONHSAG010925.2	-0.543944	[-0.97352046; -0.11436830]	0.0130713	0.574113	0.0068822	REM
NONHSAG070757.1	0.271738	[0.05711638; 0.48635874]	0.0130791	0.306201	0.14661	FEM
NONHSAG014423.2	0.269663	[0.05665247; 0.48267439]	0.0130911	0	0.874988	FEM
NONHSAG040216.3	0.27046	[0.05680263; 0.48411688]	0.0130984	0	0.538282	FEM
NONHSAG002747.2	0.271048	[0.05692243; 0.48517369]	0.0131	0.145514	0.301691	FEM
NONHSAG094375.1	0.270108	[0.05667640; 0.48353978]	0.0131208	0	0.649	FEM
NONHSAG103459.1	0.269418	[0.05651690; 0.48231911]	0.0131271	0	0.825421	FEM
NONHSAG112033.1	0.270386	[0.05667657; 0.48409604]	0.0131457	0.1327	0.314546	FEM
NONHSAG094326.2	0.271413	[0.05687332; 0.48595230]	0.0131535	0.360908	0.101761	FEM
NONHSAG007310.2	-0.270981	[-0.48523511; -0.05672727]	0.0131773	0.370063	0.0949315	FEM
NONHSAG012900.2	0.271527	[0.05682178; 0.48623271]	0.0131857	0.395221	0.0773096	FEM
NONHSAG088844.1	0.269635	[0.05642440; 0.48284482]	0.0131863	0	0.704395	FEM
NONHSAG094747.2	-0.271303	[-0.48584441; -0.05676210]	0.0131912	0.326848	0.128934	FEM
NONHSAG082787.1	0.271433	[0.05672960; 0.48613731]	0.0132167	0.444423	0.0481713	FEM
NONHSAG077805.1	0.270844	[0.05658293; 0.48510554]	0.0132268	0.306502	0.146346	FEM
NONHSAG005435.2	0.271125	[0.05656221; 0.48568789]	0.0132608	0.349299	0.110722	FEM
NONHSAG018439.3	0.269233	[0.05613140; 0.48233382]	0.0132764	0	0.808351	FEM
NONHSAG104227.1	0.270685	[0.05641338; 0.48495733]	0.0132853	0.28093	0.169276	FEM
NONHSAG052975.2	0.271474	[0.05656575; 0.48638183]	0.0132905	0.38448	0.0846207	FEM
NONHSAG082840.1	0.269513	[0.05615287; 0.48287302]	0.0132923	0	0.62335	FEM
NONHSAG069489.1	0.27185	[0.05659891; 0.48710123]	0.0133098	0.513397	0.0200789	FEM
NONHSAG024106.2	0.269404	[0.05606646; 0.48274251]	0.0133199	0	0.725704	FEM
NONHSAG101116.1	0.269832	[0.05611866; 0.48354614]	0.0133358	0	0.448823	FEM
NONHSAG019125.3	0.27168	[0.05648343; 0.48687594]	0.0133442	0.452726	0.0439931	FEM
NONHSAG014109.2	-0.27106	[-0.48580637; -0.05631456]	0.0133615	0.46168	0.039733	FEM
NONHSAG068421.1	0.269741	[0.05602946; 0.48345237]	0.0133662	0	0.470521	FEM
NONHSAG111654.1	0.269837	[0.05604064; 0.48363385]	0.01337	0.0826985	0.364268	FEM
NONHSAG059068.1	0.271405	[0.05634630; 0.48646402]	0.0133786	0.447147	0.0467765	FEM
NONHSAG029206.2	-0.268883	[-0.48198101; -0.05578502]	0.013395	0	0.700826	FEM
NONHSAG016537.2	0.268879	[0.05577085; 0.48198806]	0.0134008	0	0.812512	FEM
NONHSAG070121.1	0.272109	[0.05643692; 0.48778161]	0.0134025	0.554906	0.0100372	FEM
NONHSAG087386.1	0.269514	[0.05589608; 0.48313252]	0.0134037	0.0245797	0.420342	FEM
NONHSAG095028.1	0.269637	[0.05591531; 0.48335907]	0.0134064	0.162178	0.28496	FEM
NONHSAG078487.1	0.271815	[0.05635772; 0.48727221]	0.0134103	0.554252	0.01016	FEM
NONHSAG017157.2	0.269	[0.05575545; 0.48224415]	0.0134184	0	0.632957	FEM
NONHSAG088705.1	0.268544	[0.05565373; 0.48143372]	0.0134215	0	0.930194	FEM
NONHSAG070514.1	0.269135	[0.05575698; 0.48251248]	0.0134299	0	0.553035	FEM
NONHSAG084508.1	0.26957	[0.05583549; 0.48330467]	0.013435	0.223936	0.22351	FEM
NONHSAG010225.2	0.27147	[0.05622227; 0.48671731]	0.0134379	0.455227	0.0427774	FEM
NONHSAG042650.2	0.269738	[0.05585702; 0.48361808]	0.0134407	0.00396166	0.439605	FEM
NONHSAG045120.2	0.269801	[0.05586069; 0.48374189]	0.0134448	0.246056	0.20205	FEM
NONHSAG111444.1	0.271478	[0.05616412; 0.48679227]	0.0134638	0.552028	0.0105854	FEM
NONHSAG027996.2	-0.269194	[-0.48270247; -0.05568528]	0.0134665	0	0.453994	FEM
NONHSAG037520.2	0.271186	[0.05608322; 0.48628846]	0.0134726	0.444487	0.048138	FEM
NONHSAG031288.2	0.271645	[0.05612939; 0.48715986]	0.0134936	0.553025	0.0103933	FEM
NONHSAG074686.1	0.269982	[0.05577260; 0.48419232]	0.0134994	0.222693	0.224728	FEM
NONHSAG066750.1	0.270824	[0.05590120; 0.48574769]	0.0135191	0.424161	0.0592773	FEM
NONHSAG107239.1	0.270229	[0.05577722; 0.48468095]	0.0135196	0.299658	0.152377	FEM
NONHSAG035163.2	0.270474	[0.05581050; 0.48513784]	0.0135271	0.360459	0.102102	FEM
NONHSAG016362.2	0.269411	[0.05556758; 0.48325362]	0.0135374	0.0264447	0.418582	FEM
NONHSAG063076.1	0.269009	[0.05548280; 0.48253533]	0.0135382	0.0715063	0.375242	FEM
NONHSAG072605.1	0.270287	[0.05571384; 0.48486050]	0.0135524	0.331511	0.125061	FEM
NONHSAG104517.2	0.268962	[0.05542558; 0.48249848]	0.013559	0.0140557	0.430221	FEM
NONHSAG102651.1	0.268695	[0.05536376; 0.48202570]	0.013562	0	0.657074	FEM
NONHSAG098913.1	0.267813	[0.05509229; 0.48053278]	0.0136015	0	0.919362	FEM
NONHSAG072427.1	0.269077	[0.05534654; 0.48280719]	0.0136041	0.0731369	0.373648	FEM
NONHSAG053907.2	0.269144	[0.05532225; 0.48296674]	0.0136208	0.0522427	0.393948	FEM
NONHSAG069655.1	0.268415	[0.05514578; 0.48168397]	0.0136325	0	0.822804	FEM
NONHSAG011680.2	0.270562	[0.05556641; 0.48555765]	0.0136414	0.428828	0.0566058	FEM
NONHSAG082417.1	0.268183	[0.05503935; 0.48132590]	0.0136584	0	0.573027	FEM
NONHSAG041086.2	-0.267606	[-0.48030119; -0.05491050]	0.013663	0	0.936526	FEM
NONHSAG104905.1	0.268618	[0.05509942; 0.48213689]	0.0136713	0.0240985	0.420796	FEM
NONHSAG113065.1	0.268916	[0.05515942; 0.48267297]	0.0136718	0	0.494434	FEM
NONHSAG078471.1	0.269794	[0.05531373; 0.48427351]	0.013683	0.355923	0.105569	FEM
NONHSAG043043.2	-0.269079	[-0.48300230; -0.05515620]	0.0136879	0.141628	0.305591	FEM
NONHSAG090615.1	0.268073	[0.05493745; 0.48120913]	0.0136935	0	0.773025	FEM
NONHSAG095303.1	0.267768	[0.05483098; 0.48070407]	0.0137129	0	0.919577	FEM
NONHSAG007246.2	0.268123	[0.05488239; 0.48136345]	0.0137223	0	0.782651	FEM
NONHSAG002948.2	0.270179	[0.05529570; 0.48506218]	0.0137256	0.450229	0.0452264	FEM
NONHSAG083257.1	0.268362	[0.05488774; 0.48183530]	0.0137416	0	0.705436	FEM
NONHSAG013208.2	0.268661	[0.05494009; 0.48238233]	0.0137455	0.0524073	0.393789	FEM
NONHSAG063352.1	0.268173	[0.05476323; 0.48158192]	0.0137796	0.0481335	0.397905	FEM
NONHSAG109341.1	0.269461	[0.05501426; 0.48390716]	0.0137849	0.384808	0.0843925	FEM
NONHSAG031542.2	0.26892	[0.05489181; 0.48294852]	0.0137903	0.115769	0.331481	FEM
NONHSAG062257.1	0.269693	[0.05503578; 0.48435046]	0.0137964	0.420144	0.0616299	FEM
NONHSAG002643.2	0.26924	[0.05494197; 0.48353798]	0.0137969	0.197338	0.249784	FEM
NONHSAG076639.1	0.268708	[0.05483049; 0.48258519]	0.0137982	0.0609165	0.385556	FEM
NONHSAG059484.1	0.268616	[0.05477835; 0.48245407]	0.0138131	0.219695	0.227669	FEM
NONHSAG007847.2	0.268979	[0.05481824; 0.48313892]	0.0138281	0.11629	0.33096	FEM
NONHSAG108968.1	0.268223	[0.05463566; 0.48181067]	0.0138408	0	0.534767	FEM
NONHSAG102271.1	0.268724	[0.05473310; 0.48271555]	0.0138429	0.215076	0.232214	FEM
NONHSAG029465.2	0.268522	[0.05468800; 0.48235543]	0.0138446	0.167329	0.27979	FEM
NONHSAG004236.3	0.269242	[0.05475172; 0.48373249]	0.0138814	0.278156	0.171826	FEM
NONHSAG107055.1	0.268438	[0.05457638; 0.48229868]	0.0138866	0.0849275	0.362074	FEM
NONHSAG095817.1	0.267845	[0.05444107; 0.48124949]	0.0138933	0	0.575529	FEM
NONHSAG067619.1	0.268096	[0.05447830; 0.48171313]	0.0138994	0.155683	0.291481	FEM
NONHSAG082750.1	-0.269432	[-0.48420291; -0.05466048]	0.013939	0.446946	0.0468783	FEM
NONHSAG049157.2	0.268141	[0.05439487; 0.48188688]	0.0139407	0	0.501831	FEM
NONHSAG095684.1	0.267839	[0.05432633; 0.48135199]	0.013944	0	0.559717	FEM
NONHSAG090180.1	0.268583	[0.05447542; 0.48269051]	0.0139448	0.124745	0.322512	FEM
NONHSAG081145.1	0.267727	[0.05429578; 0.48115794]	0.0139474	0	0.614499	FEM
NONHSAG036116.2	0.267427	[0.05422084; 0.48063257]	0.0139537	0	0.790359	FEM
NONHSAG045818.2	-0.268322	[-0.48225554; -0.05438752]	0.0139603	0.272821	0.176758	FEM
NONHSAG046004.2	-0.268322	[-0.48225554; -0.05438752]	0.0139603	0.272821	0.176758	FEM
NONHSAG046333.2	-0.268322	[-0.48225554; -0.05438752]	0.0139603	0.272821	0.176758	FEM
NONHSAG066936.1	0.268982	[0.05449377; 0.48346961]	0.0139726	0.47444	0.0341029	FEM
NONHSAG027025.2	0.267496	[0.05418109; 0.48081053]	0.0139778	0	0.637467	FEM
NONHSAG113194.1	0.267703	[0.05419191; 0.48121355]	0.0139918	0	0.497353	FEM
NONHSAG051194.3	0.269	[0.05444851; 0.48355143]	0.0139945	0.35675	0.104933	FEM
NONHSAG038602.2	0.268532	[0.05431537; 0.48274803]	0.0140116	0.161759	0.28538	FEM
NONHSAG061345.1	0.268551	[0.05431732; 0.48278509]	0.0140125	0.183913	0.263176	FEM
NONHSAG084912.1	0.267739	[0.05412483; 0.48135291]	0.0140252	0	0.627102	FEM
NONHSAG041777.3	0.267689	[0.05404508; 0.48133336]	0.0140565	0.0278532	0.41725	FEM
NONHSAG094507.1	0.268098	[0.05411766; 0.48207766]	0.0140609	0.261472	0.187378	FEM
NONHSAG045430.3	0.269002	[0.05428013; 0.48372458]	0.0140699	0.358531	0.10357	FEM
NONHSAG019115.3	-0.268871	[-0.48349574; -0.05424700]	0.0140729	0.392588	0.0790718	FEM
NONHSAG114782.1	0.268377	[0.05408449; 0.48267026]	0.0141012	0.366873	0.0972872	FEM
NONHSAG039497.3	0.267623	[0.05387499; 0.48137069]	0.014127	0.192894	0.254209	FEM
NONHSAG055591.2	-0.267175	[-0.48056624; -0.05378462]	0.0141272	0	0.621291	FEM
NONHSAG088881.1	0.267095	[0.05375581; 0.48043364]	0.0141329	0	0.716684	FEM
NONHSAG010607.2	0.268231	[0.05396953; 0.48249259]	0.0141396	0.215244	0.232049	FEM
NONHSAG104343.1	0.268259	[0.05395278; 0.48256516]	0.0141497	0.267284	0.181919	FEM
NONHSAG109675.1	0.266833	[0.05365464; 0.48001135]	0.0141548	0	0.799502	FEM
NONHSAG054221.3	0.269083	[0.05410193; 0.48406422]	0.0141571	0.451204	0.0447426	FEM
NONHSAG031696.3	0.625379	[0.12572402; 1.12503397]	0.01416	0.693326	0.000177959	REM
NONHSAG078845.1	0.267925	[0.05384540; 0.48200409]	0.0141678	0.165904	0.28122	FEM
NONHSAG018597.2	0.266858	[0.05361715; 0.48009802]	0.014174	0	0.550716	FEM
NONHSAG082154.1	0.266975	[0.05362320; 0.48032747]	0.014182	0	0.694743	FEM
NONHSAG014570.2	0.266558	[0.05352690; 0.47958966]	0.0141877	0	0.82876	FEM
NONHSAG065943.1	0.267182	[0.05364400; 0.48072010]	0.0141914	0	0.571893	FEM
NONHSAG076192.1	0.266748	[0.05354533; 0.47994983]	0.0141966	0	0.830444	FEM
NONHSAG106450.1	0.267447	[0.05368551; 0.48120857]	0.0141967	0	0.466266	FEM
NONHSAG077405.1	0.268046	[0.05380409; 0.48228812]	0.0141974	0.286378	0.164303	FEM
NONHSAG115066.1	0.267926	[0.05376261; 0.48208869]	0.0142053	0.142736	0.30448	FEM
NONHSAG069424.1	0.267605	[0.05366135; 0.48154954]	0.014222	0.119889	0.327367	FEM
NONHSAG048679.2	0.268755	[0.05388894; 0.48362152]	0.0142234	0.438612	0.0512251	FEM
NONHSAG082811.1	0.267036	[0.05352646; 0.48054514]	0.0142314	0	0.59252	FEM
NONHSAG103839.1	0.266897	[0.05341637; 0.48037841]	0.0142688	0	0.470978	FEM
NONHSAG085923.1	0.268944	[0.05381082; 0.48407728]	0.0142757	0.488595	0.0284619	FEM
NONHSAG101263.1	0.266658	[0.05334897; 0.47996657]	0.0142777	0	0.645177	FEM
NONHSAG062605.1	0.265813	[0.05317471; 0.47845173]	0.0142801	0	0.986475	FEM
NONHSAG045647.2	0.268293	[0.05366441; 0.48292141]	0.014283	0.323037	0.132134	FEM
NONHSAG045838.2	0.268293	[0.05366441; 0.48292141]	0.014283	0.323037	0.132134	FEM
NONHSAG046187.2	0.268293	[0.05366441; 0.48292141]	0.014283	0.323037	0.132134	FEM
NONHSAG046359.2	0.268293	[0.05366441; 0.48292141]	0.014283	0.323037	0.132134	FEM
NONHSAG016542.2	0.266436	[0.05327199; 0.47959979]	0.0142925	0	0.655674	FEM
NONHSAG075803.1	0.267846	[0.05355016; 0.48214173]	0.0142943	0.258712	0.189985	FEM
NONHSAG073752.1	0.269163	[0.05381178; 0.48451374]	0.014295	0.512353	0.0203943	FEM
NONHSAG026420.2	0.268147	[0.05359006; 0.48270447]	0.0143035	0.41458	0.0649702	FEM
NONHSAG071268.1	0.265921	[0.05313624; 0.47870655]	0.0143076	0	0.91719	FEM
NONHSAG035896.3	0.26889	[0.05372263; 0.48405787]	0.0143107	0.552259	0.0105407	FEM
NONHSAG002600.2	0.267315	[0.05339887; 0.48123175]	0.0143148	0.147539	0.299659	FEM
NONHSAG052431.2	0.266883	[0.05331250; 0.48045440]	0.0143149	0	0.453724	FEM
NONHSAG115227.1	0.267283	[0.05336987; 0.48119601]	0.0143251	0.218868	0.228482	FEM
NONHSAG049978.3	0.266647	[0.05322125; 0.48007269]	0.0143349	0	0.607123	FEM
NONHSAG006793.2	0.267514	[0.05333742; 0.48169151]	0.0143609	0.340836	0.117455	FEM
NONHSAG062921.1	0.268799	[0.05356038; 0.48403834]	0.014376	0.481203	0.031329	FEM
NONHSAG081152.1	0.267206	[0.05318933; 0.48122339]	0.0144005	0.188192	0.258901	FEM
NONHSAG061630.1	-0.267956	[-0.48262360; -0.05328921]	0.014423	0.319788	0.134885	FEM
NONHSAG043324.2	0.266002	[0.05287446; 0.47913021]	0.014435	0	0.792471	FEM
NONHSAG045529.2	0.266002	[0.05287446; 0.47913021]	0.014435	0	0.792471	FEM
NONHSAG045821.2	0.266002	[0.05287446; 0.47913021]	0.014435	0	0.792471	FEM
NONHSAG046007.2	0.266002	[0.05287446; 0.47913021]	0.014435	0	0.792471	FEM
NONHSAG046337.2	0.266002	[0.05287446; 0.47913021]	0.014435	0	0.792471	FEM
NONHSAG025526.2	0.268801	[0.05341962; 0.48418239]	0.0144401	0.550615	0.0108622	FEM
NONHSAG083800.1	0.266904	[0.05295745; 0.48085051]	0.0144791	0.0549493	0.391335	FEM
NONHSAG070464.1	0.268206	[0.05319903; 0.48321357]	0.0144868	0.461617	0.0397619	FEM
NONHSAG031363.2	0.267965	[0.05314603; 0.48278337]	0.0144891	0.421323	0.0609342	FEM
NONHSAG065716.1	0.268493	[0.05322271; 0.48376367]	0.014502	0.519142	0.0184018	FEM
NONHSAG052739.2	0.266908	[0.05287942; 0.48093675]	0.0145153	0.284368	0.166133	FEM
NONHSAG085842.1	-0.268786	[-0.48437898; -0.05319270]	0.0145421	0.548553	0.0112751	FEM
NONHSAG103879.2	0.266083	[0.05263389; 0.47953300]	0.0145532	0	0.612647	FEM
NONHSAG107540.1	0.266982	[0.05279820; 0.48116585]	0.0145594	0.205776	0.241405	FEM
NONHSAG113494.1	0.267662	[0.05292434; 0.48240034]	0.0145632	0.377778	0.0893449	FEM
NONHSAG033349.2	-0.267402	[-0.48193071; -0.05287231]	0.0145635	0.405077	0.0708898	FEM
NONHSAG054755.2	0.267013	[0.05275848; 0.48126817]	0.0145805	0.305473	0.147248	FEM
NONHSAG099388.1	0.265713	[0.05249070; 0.47893542]	0.0145856	0	0.750167	FEM
NONHSAG027535.2	0.267197	[0.05271884; 0.48167416]	0.0146154	0.330636	0.125785	FEM
NONHSAG065781.1	0.266123	[0.05245904; 0.47978724]	0.0146377	0.0502528	0.395866	FEM
NONHSAG057788.1	0.264845	[0.05217917; 0.47751080]	0.0146507	0	0.964428	FEM
NONHSAG077906.1	0.266677	[0.05253588; 0.48081826]	0.0146526	0.274462	0.175237	FEM
NONHSAG012159.2	0.266162	[0.05243269; 0.47989059]	0.0146534	0.0277706	0.417328	FEM
NONHSAG049177.2	0.267076	[0.05259863; 0.48155355]	0.01466	0.451881	0.0444083	FEM
NONHSAG110131.1	0.266288	[0.05240125; 0.48017426]	0.0146795	0.288142	0.162703	FEM
NONHSAG056187.1	0.267072	[0.05250032; 0.48164384]	0.014705	0.297821	0.154009	FEM
NONHSAG093726.2	0.266899	[0.05246255; 0.48133644]	0.0147068	0.347685	0.111993	FEM
NONHSAG036220.3	0.265921	[0.05224318; 0.47959805]	0.0147194	0.0511746	0.394978	FEM
NONHSAG058696.1	0.265876	[0.05222759; 0.47952539]	0.0147226	0	0.480562	FEM
NONHSAG106229.1	0.26787	[0.05261557; 0.48312503]	0.0147243	0.495679	0.0258748	FEM
NONHSAG079525.1	0.265684	[0.05217054; 0.47919679]	0.0147315	0	0.535799	FEM
NONHSAG049888.2	0.265615	[0.05215374; 0.47907694]	0.0147331	0	0.654595	FEM
NONHSAG098812.1	0.265868	[0.05220017; 0.47953491]	0.0147345	0	0.502104	FEM
NONHSAG087623.1	-0.542583	[-0.97877259; -0.10639360]	0.0147657	0.591291	0.00473468	REM
NONHSAG102408.1	0.2651	[0.05193843; 0.47826059]	0.0147864	0	0.85836	FEM
NONHSAG011432.2	0.265	[0.05191331; 0.47808745]	0.014789	0	0.824203	FEM
NONHSAG006663.3	0.267647	[0.05236545; 0.48292790]	0.0148197	0.503916	0.0230619	FEM
NONHSAG014611.3	0.266311	[0.05209052; 0.48053198]	0.0148261	0.260787	0.188025	FEM
NONHSAG071406.1	0.265705	[0.05193689; 0.47947257]	0.0148425	0.200048	0.247089	FEM
NONHSAG111891.1	0.267611	[0.05230372; 0.48291774]	0.0148451	0.550075	0.0109693	FEM
NONHSAG029042.2	0.266202	[0.05198787; 0.48041519]	0.014864	0.324833	0.130623	FEM
NONHSAG040081.3	0.267651	[0.05224091; 0.48306027]	0.0148779	0.497377	0.0252778	FEM
NONHSAG031840.3	0.265888	[0.05187099; 0.47990458]	0.01489	0.10795	0.339273	FEM
NONHSAG036706.2	0.265814	[0.05182614; 0.47980285]	0.0149043	0.223362	0.224072	FEM
NONHSAG017999.2	0.267669	[0.05218344; 0.48315523]	0.0149064	0.499538	0.0245312	FEM
NONHSAG094682.1	0.266432	[0.05193444; 0.48092952]	0.01491	0.313172	0.140551	FEM
NONHSAG106705.1	0.264988	[0.05165233; 0.47832348]	0.0149103	0	0.609162	FEM
NONHSAG075893.1	0.264543	[0.05153734; 0.47754931]	0.0149236	0	0.721499	FEM
NONHSAG114070.1	0.266302	[0.05179846; 0.48080486]	0.0149618	0.339041	0.118905	FEM
NONHSAG032431.2	0.266571	[0.05179024; 0.48135157]	0.0149902	0.397944	0.0755077	FEM
NONHSAG049872.2	0.265693	[0.05161808; 0.47976885]	0.014991	0.163348	0.283785	FEM
NONHSAG106642.1	0.264209	[0.05132388; 0.47709495]	0.0149937	0	0.877469	FEM
NONHSAG050808.2	0.266533	[0.05174935; 0.48131608]	0.0150059	0.495811	0.025828	FEM
NONHSAG064804.1	0.264934	[0.05140904; 0.47845882]	0.01502	0.0701112	0.376605	FEM
NONHSAG058742.1	0.26536	[0.05148444; 0.47923488]	0.0150234	0.0940648	0.353054	FEM
NONHSAG028923.2	0.265503	[0.05149224; 0.47951312]	0.0150328	0.320386	0.134377	FEM
NONHSAG049942.2	0.264246	[0.05120536; 0.47728672]	0.0150532	0	0.805364	FEM
NONHSAG103494.1	0.26431	[0.05120228; 0.47741837]	0.0150606	0	0.689994	FEM
NONHSAG020075.2	0.26594	[0.05150660; 0.48037419]	0.015066	0.265082	0.183982	FEM
NONHSAG049527.2	0.267372	[0.05178153; 0.48296210]	0.0150671	0.551084	0.0107697	FEM
NONHSAG112380.1	0.265953	[0.05146492; 0.48044058]	0.0150868	0.32358	0.131677	FEM
NONHSAG030105.2	0.265524	[0.05137616; 0.47967283]	0.0150896	0.294853	0.156659	FEM
NONHSAG110077.1	0.26584	[0.05141416; 0.48026486]	0.0151004	0.31833	0.136127	FEM
NONHSAG111538.1	0.264179	[0.05108379; 0.47727470]	0.0151048	0	0.76179	FEM
NONHSAG020962.3	0.266842	[0.05158179; 0.48210213]	0.0151128	0.461971	0.0395987	FEM
NONHSAG104379.1	0.265027	[0.05121947; 0.47883519]	0.0151182	0.196307	0.25081	FEM
NONHSAG022834.2	-0.759926	[-1.37316255; -0.14668925]	0.0151471	0.789829	2.36744e-07	REM
NONHSAG104989.1	0.266566	[0.05144054; 0.48169226]	0.0151542	0.49294	0.0268566	FEM
NONHSAG031433.2	0.266677	[0.05143575; 0.48191923]	0.0151666	0.553439	0.0103142	FEM
NONHSAG039487.2	0.264966	[0.05110470; 0.47882731]	0.0151671	0.127576	0.319678	FEM
NONHSAG084437.1	-0.266802	[-0.48216716; -0.05143781]	0.015177	0.528198	0.0159522	FEM
NONHSAG098933.1	0.264721	[0.05098697; 0.47845520]	0.0152006	0	0.45774	FEM
NONHSAG050052.2	0.26379	[0.05080244; 0.47677704]	0.015203	0	0.879305	FEM
NONHSAG078823.1	0.263851	[0.05079492; 0.47690804]	0.0152123	0	0.822617	FEM
NONHSAG051303.2	0.263861	[0.05078880; 0.47693420]	0.0152162	0	0.776304	FEM
NONHSAG056171.1	0.263976	[0.05078164; 0.47716940]	0.0152301	0	0.853586	FEM
NONHSAG079543.1	0.264493	[0.05086371; 0.47812174]	0.0152384	0.20583	0.241352	FEM
NONHSAG093410.1	0.265446	[0.05102968; 0.47986173]	0.0152466	0.216061	0.231245	FEM
NONHSAG089862.1	0.263259	[0.05056748; 0.47595013]	0.0152666	0	0.981888	FEM
NONHSAG008407.2	0.264754	[0.05085396; 0.47865381]	0.015267	0.164989	0.282139	FEM
NONHSAG114787.1	0.265941	[0.05107491; 0.48080735]	0.0152704	0.373753	0.0922395	FEM
NONHSAG054101.2	-0.63265	[-1.14389332; -0.12140650]	0.0152895	0.697469	0.000147422	REM
NONHSAG100608.1	0.265705	[0.05098789; 0.48042155]	0.0152901	0.345924	0.113387	FEM
NONHSAG095173.1	0.264484	[0.05070767; 0.47826012]	0.0153121	0.0851526	0.361852	FEM
NONHSAG018987.2	0.264264	[0.05066519; 0.47786313]	0.0153123	0	0.530814	FEM
NONHSAG054635.3	0.263791	[0.05054677; 0.47703492]	0.0153256	0	0.600605	FEM
NONHSAG010119.2	0.264088	[0.05057571; 0.47760039]	0.015339	0	0.542834	FEM
NONHSAG114413.1	0.263463	[0.05045095; 0.47647566]	0.0153415	0	0.877847	FEM
NONHSAG034912.2	0.264471	[0.05057632; 0.47836617]	0.0153739	0.0149392	0.429395	FEM
NONHSAG005291.3	0.265327	[0.05067870; 0.47997507]	0.0154032	0.365319	0.0984437	FEM
NONHSAG027699.2	-0.263314	[-0.47634632; -0.05028100]	0.0154095	0	0.868792	FEM
NONHSAG019995.2	0.264483	[0.05050135; 0.47846402]	0.0154109	0.0586685	0.387735	FEM
NONHSAG008705.2	0.265583	[0.05070537; 0.48046057]	0.0154138	0.482104	0.0309704	FEM
NONHSAG023222.2	-0.264762	[-0.47898176; -0.05054202]	0.015417	0.222106	0.225303	FEM
NONHSAG066870.1	-0.264123	[-0.47783535; -0.05040981]	0.0154219	0.0411627	0.40459	FEM
NONHSAG093545.1	0.264817	[0.05052726; 0.47910649]	0.0154291	0.309615	0.143631	FEM
NONHSAG092754.1	0.26314	[0.05017185; 0.47610902]	0.0154463	0	0.745597	FEM
NONHSAG032960.2	0.265214	[0.05055852; 0.47986948]	0.0154504	0.349071	0.110901	FEM
NONHSAG046915.2	0.265196	[0.05052772; 0.47986347]	0.0154635	0.378555	0.0887906	FEM
NONHSAG097357.1	0.263296	[0.05012045; 0.47647082]	0.0154854	0	0.850099	FEM
NONHSAG111244.1	-0.264737	[-0.47910498; -0.05036808]	0.0154982	0.488561	0.0284747	FEM
[truncated: 2,764 more rows]
