# Supplementary material for: Integrating the Ribonucleic Acid Sequencing Data From Various Studies for Exploring the Multiple Sclerosis-Related Long Noncoding Ribonucleic Acids and Their Functions
Source: Front Genet. 2019 Nov 12;10:1136. doi: 10.3389/fgene.2019.01136 (PMC6861379; doi:10.3389/fgene.2019.01136)
Supplement: Supplementary file 3 [file Table_3.xlsx]

## Sheet: Sheet1
Table S3 The significantly differentially expressed lncRNAs between MS and control in brain tissues
LncRNAs	Meta-analysis			Heterogeneity test		Model
	SMD	95% CI	P value	I2	Qp
NONHSAG077535.1	1.35159	[0.88711196; 1.81606477]	1.17414e-08	0	0.434901	FEM
NONHSAG016111.2	1.351	[0.88535493; 1.81665039]	1.29573e-08	0.108293	0.345996	FEM
NONHSAG071580.1	1.33079	[0.86465506; 1.79692603]	2.19747e-08	0.235882	0.24131	FEM
NONHSAG073910.2	1.28841	[0.83033398; 1.74647694]	3.53089e-08	0	0.652491	FEM
NONHSAG111137.1	1.28927	[0.82085360; 1.75768794]	6.86376e-08	0.451283	0.0782544	FEM
NONHSAG016150.2	1.24496	[0.78989706; 1.70003187]	8.22466e-08	0	0.688612	FEM
NONHSAG028467.2	1.22874	[0.77583691; 1.68165253]	1.052e-07	0	0.79987	FEM
NONHSAG069062.1	1.21059	[0.75852811; 1.66265866]	1.53162e-07	0	0.781045	FEM
NONHSAG007624.2	1.23144	[0.76900352; 1.69387139]	1.79525e-07	0.362044	0.139821	FEM
NONHSAG069476.1	1.19979	[0.74797039; 1.65160758]	1.94296e-07	0	0.746225	FEM
NONHSAG043371.3	1.25417	[0.78049617; 1.72783503]	2.10723e-07	0.611	0.0119932	FEM
NONHSAG039516.2	1.1766	[0.72572457; 1.62748098]	3.14112e-07	0	0.712279	FEM
NONHSAG052548.2	1.18121	[0.72110243; 1.64132453]	4.85942e-07	0.386916	0.121409	FEM
NONHSAG005322.2	1.14369	[0.69501544; 1.59236852]	5.8499e-07	0	0.745899	FEM
NONHSAG001879.2	1.14654	[0.69362302; 1.59946505]	6.99042e-07	0.0636798	0.381047	FEM
NONHSAG002018.2	1.13123	[0.68185307; 1.58059791]	8.05639e-07	0	0.614674	FEM
NONHSAG075718.1	1.13609	[0.68364642; 1.58854298]	8.58626e-07	0.0736482	0.373316	FEM
NONHSAG070144.1	1.13328	[0.68074265; 1.58581919]	9.1831e-07	0.0974939	0.354584	FEM
NONHSAG038619.3	1.10872	[0.66120181; 1.55623774]	1.19857e-06	0	0.675381	FEM
NONHSAG016118.2	1.12082	[0.66731276; 1.57432343]	1.27218e-06	0.224105	0.251092	FEM
NONHSAG040901.2	-1.11113	[-1.56105971; -0.66119544]	1.29638e-06	0	0.464469	FEM
NONHSAG060498.1	1.09869	[0.65276381; 1.54462541]	1.37156e-06	0	0.774263	FEM
NONHSAG091425.1	1.09315	[0.64806742; 1.53824241]	1.48051e-06	0	0.823885	FEM
NONHSAG074831.1	1.11476	[0.65865212; 1.57085856]	1.66443e-06	0.376373	0.129115	FEM
NONHSAG005323.3	1.07415	[0.63275695; 1.51555284]	1.84484e-06	0	0.984783	FEM
NONHSAG111866.1	1.08475	[0.63552731; 1.53396530]	2.21349e-06	0.029686	0.406928	FEM
NONHSAG076291.1	1.07901	[0.63117645; 1.52684401]	2.33053e-06	0	0.497264	FEM
NONHSAG028493.2	1.06135	[0.61906226; 1.50363081]	2.55866e-06	0	0.912549	FEM
NONHSAG043588.2	1.05878	[0.61747094; 1.50008548]	2.57115e-06	0	0.960198	FEM
NONHSAG074938.1	1.0781	[0.62727022; 1.52892630]	2.77114e-06	0.197904	0.272845	FEM
NONHSAG107901.1	-1.09125	[-1.54777545; -0.63472032]	2.79917e-06	0.439881	0.0853445	FEM
NONHSAG102271.1	1.07573	[0.62516289; 1.52628736]	2.87528e-06	0.187921	0.281113	FEM
NONHSAG060567.1	1.07211	[0.62146366; 1.52275974]	3.11743e-06	0.207556	0.264837	FEM
NONHSAG106108.1	1.03652	[0.59581480; 1.47721746]	4.02939e-06	0	0.932884	FEM
NONHSAG013063.2	1.05123	[0.60349873; 1.49896520]	4.18694e-06	0.0568828	0.386282	FEM
NONHSAG048602.2	1.03004	[0.58868068; 1.47140574]	4.78021e-06	0	0.864024	FEM
NONHSAG084368.1	1.02715	[0.58524941; 1.46904950]	5.21839e-06	0	0.805625	FEM
NONHSAG033411.2	1.01051	[0.57186074; 1.44916491]	6.32548e-06	0	0.969527	FEM
NONHSAG106972.1	-1.01915	[-1.46305935; -0.57524780]	6.79787e-06	0	0.575815	FEM
NONHSAG026462.2	1.03031	[0.58133550; 1.47929431]	6.86619e-06	0.241207	0.236891	FEM
NONHSAG093490.1	1.02387	[0.57762211; 1.47011637]	6.89115e-06	0.0480123	0.39307	FEM
NONHSAG085210.1	1.02746	[0.57841651; 1.47649536]	7.30116e-06	0.253365	0.226816	FEM
NONHSAG011030.2	1.01592	[0.57127092; 1.46056411]	7.52894e-06	0	0.492793	FEM
NONHSAG045116.3	1.01605	[0.56889436; 1.46320178]	8.44332e-06	0.163516	0.301235	FEM
NONHSAG060603.1	1.01959	[0.57084453; 1.46833274]	8.45591e-06	0.259689	0.221586	FEM
NONHSAG034768.2	1.03072	[0.57658546; 1.48484959]	8.64722e-06	0.465657	0.0697046	FEM
NONHSAG026644.2	1.01086	[0.56193368; 1.45977800]	1.01755e-05	0.295218	0.192451	FEM
NONHSAG044543.2	0.991542	[0.55058726; 1.43249580]	1.04663e-05	0	0.729722	FEM
NONHSAG114429.1	-0.977695	[-1.41452339; -0.54086691]	1.15025e-05	0	0.978317	FEM
NONHSAG105176.1	1.01685	[0.56246019; 1.47124760]	1.15381e-05	0.493626	0.0544059	FEM
NONHSAG041514.2	1.00132	[0.55230444; 1.45034328]	1.23766e-05	0.325091	0.168466	FEM
NONHSAG051672.2	0.99204	[0.54699385; 1.43708695]	1.24829e-05	0.0854288	0.364103	FEM
NONHSAG024840.2	0.98397	[0.54130814; 1.42663261]	1.3199e-05	0	0.527703	FEM
NONHSAG044543.3	1.01167	[0.55633952; 1.46699577]	1.33181e-05	0.523957	0.0399786	FEM
NONHSAG057222.1	0.985823	[0.54159433; 1.43005223]	1.36393e-05	0.0345525	0.40327	FEM
NONHSAG044421.3	-0.987197	[-1.43258999; -0.54180356]	1.39743e-05	0.137447	0.322524	FEM
NONHSAG019930.2	-0.996082	[-1.44561616; -0.54654800]	1.40558e-05	0.361413	0.140299	FEM
NONHSAG003711.2	1.00959	[0.55280407; 1.46638373]	1.47775e-05	0.558367	0.0265202	FEM
NONHSAG027894.2	0.976884	[0.53457587; 1.41919143]	1.49878e-05	0	0.531038	FEM
NONHSAG036298.2	0.975218	[0.53254368; 1.41789153]	1.57513e-05	0	0.490574	FEM
NONHSAG096674.1	0.98496	[0.53686751; 1.43305209]	1.64506e-05	0.319158	0.17318	FEM
NONHSAG006184.2	0.977379	[0.53098264; 1.42377455]	1.77553e-05	0.244165	0.234438	FEM
NONHSAG012400.2	0.950801	[0.51542339; 1.38617861]	1.86597e-05	0	0.983751	FEM
NONHSAG000315.3	-0.953534	[-1.39223944; -0.51482870]	2.0434e-05	0	0.770156	FEM
NONHSAG106971.1	-0.980162	[-1.43127421; -0.52904976]	2.05689e-05	0.450956	0.0784538	FEM
NONHSAG108984.1	0.966888	[0.52187842; 1.41189716]	2.05746e-05	0.184321	0.28409	FEM
NONHSAG054718.3	-0.949734	[-1.38741761; -0.51205022]	2.10905e-05	0	0.846426	FEM
NONHSAG099982.1	0.955847	[0.51449637; 1.39719830]	2.18757e-05	0	0.526581	FEM
NONHSAG028744.3	0.957259	[0.51517620; 1.39934086]	2.19505e-05	0	0.466799	FEM
NONHSAG014165.2	0.941731	[0.50395011; 1.37951252]	2.48402e-05	0	0.805488	FEM
NONHSAG114760.1	0.958462	[0.51277052; 1.40415377]	2.49789e-05	0.257171	0.223667	FEM
NONHSAG024504.3	0.941666	[0.50289631; 1.38043567]	2.59407e-05	0	0.710827	FEM
NONHSAG065148.1	0.942768	[0.50328567; 1.38225078]	2.61604e-05	0	0.646266	FEM
NONHSAG019260.2	0.930335	[0.49619228; 1.36447790]	2.6676e-05	0	0.990578	FEM
NONHSAG033429.2	0.93495	[0.49829778; 1.37160200]	2.70822e-05	0	0.874665	FEM
NONHSAG023945.2	0.960567	[0.51171828; 1.40941638]	2.73435e-05	0.405193	0.108432	FEM
NONHSAG070147.1	0.933518	[0.49693691; 1.37009979]	2.77775e-05	0	0.875062	FEM
NONHSAG003200.2	-0.940285	[-1.38275515; -0.49781478]	3.11136e-05	0.0765994	0.371016	FEM
NONHSAG026203.2	0.920199	[0.48681377; 1.35358502]	3.15983e-05	0	0.995335	FEM
NONHSAG113203.1	0.927846	[0.49054092; 1.36515019]	3.20197e-05	0	0.790652	FEM
NONHSAG028467.3	0.922623	[0.48748815; 1.35775823]	3.24128e-05	0	0.938883	FEM
NONHSAG065297.1	-0.937792	[-1.38062899; -0.49495493]	3.31497e-05	0.122498	0.334609	FEM
NONHSAG105866.1	0.963574	[0.50816768; 1.41897991]	3.36745e-05	0.576334	0.020749	FEM
NONHSAG096872.1	0.948391	[0.49964247; 1.39713910]	3.43854e-05	0.423008	0.0963045	FEM
NONHSAG029079.2	0.950522	[0.50020403; 1.40084095]	3.51683e-05	0.471165	0.0665485	FEM
NONHSAG037916.2	0.922767	[0.48555260; 1.35998205]	3.52344e-05	0	0.777243	FEM
NONHSAG053806.2	0.944928	[0.49693927; 1.39291676]	3.56249e-05	0.400731	0.111553	FEM
NONHSAG053587.2	0.92461	[0.48588955; 1.36333094]	3.61615e-05	0	0.638199	FEM
NONHSAG013158.3	0.933911	[0.49056412; 1.37725696]	3.64747e-05	0.176695	0.290387	FEM
NONHSAG015016.2	0.948738	[0.49830278; 1.39917296]	3.65473e-05	0.477215	0.0631612	FEM
NONHSAG093449.1	-0.920619	[-1.35839922; -0.48283913]	3.76029e-05	0	0.713323	FEM
NONHSAG071549.1	0.926213	[0.48567658; 1.36675040]	3.77507e-05	0	0.47493	FEM
NONHSAG004261.2	-0.92997	[-1.37334720; -0.48659303]	3.93879e-05	0.192667	0.277184	FEM
NONHSAG051829.2	0.922123	[0.48248170; 1.36176489]	3.93968e-05	0	0.539488	FEM
NONHSAG016167.2	0.905525	[0.47313825; 1.33791245]	4.04798e-05	0	0.998451	FEM
NONHSAG069244.1	0.938046	[0.48945542; 1.38663722]	4.15752e-05	0.434864	0.0885465	FEM
NONHSAG090364.1	0.933657	[0.48700270; 1.38031150]	4.18438e-05	0.367784	0.135502	FEM
NONHSAG046853.2	0.911584	[0.47536557; 1.34780194]	4.20539e-05	0	0.822151	FEM
NONHSAG064456.1	0.937773	[0.48899230; 1.38655385]	4.21041e-05	0.441793	0.0841375	FEM
NONHSAG023671.2	0.906845	[0.47153354; 1.34215729]	4.4441e-05	0	0.879999	FEM
NONHSAG001150.2	-0.920931	[-1.36336541; -0.47849671]	4.50827e-05	0.153028	0.30983	FEM
NONHSAG077226.1	0.934363	[0.48515844; 1.38356853]	4.56452e-05	0.460707	0.0725984	FEM
NONHSAG045506.2	-0.911792	[-1.35029450; -0.47329044]	4.59164e-05	0	0.602945	FEM
NONHSAG048820.2	0.930994	[0.48255626; 1.37943273]	4.71909e-05	0.440948	0.0846698	FEM
NONHSAG016112.2	0.899271	[0.46482752; 1.33371522]	4.96908e-05	0	0.917848	FEM
NONHSAG101214.1	0.899511	[0.46431557; 1.33470638]	5.09667e-05	0	0.862822	FEM
NONHSAG030478.2	0.923674	[0.47593078; 1.37141634]	5.26831e-05	0.4289	0.0924165	FEM
NONHSAG029611.2	0.900927	[0.46381911; 1.33803566]	5.35032e-05	0	0.692237	FEM
NONHSAG003298.2	0.906957	[0.46683568; 1.34707754]	5.36866e-05	0	0.435479	FEM
NONHSAG013431.2	-0.936078	[-1.39067905; -0.48147645]	5.44e-05	0.585953	0.0180104	FEM
NONHSAG006173.2	0.936412	[0.48043905; 1.39238439]	5.69345e-05	0.608676	0.0124857	FEM
NONHSAG060924.1	0.894191	[0.45851824; 1.32986294]	5.75155e-05	0	0.801159	FEM
NONHSAG015184.2	0.906075	[0.46335801; 1.34879120]	6.03639e-05	0.2234	0.251677	FEM
NONHSAG059240.1	0.892205	[0.45525835; 1.32915104]	6.27717e-05	0	0.669837	FEM
NONHSAG108202.1	0.912686	[0.46342134; 1.36195088]	6.84066e-05	0.492417	0.055029	FEM
NONHSAG041192.2	0.881116	[0.44714592; 1.31508674]	6.90585e-05	0	0.89498	FEM
NONHSAG051494.2	0.899518	[0.45546075; 1.34357554]	7.17724e-05	0.319442	0.172954	FEM
NONHSAG032384.3	0.879325	[0.44420490; 1.31444550]	7.4661e-05	0	0.791713	FEM
NONHSAG115111.1	0.881664	[0.44516897; 1.31815805]	7.52797e-05	0	0.668034	FEM
NONHSAG058539.1	0.9181	[0.46303182; 1.37316792]	7.67589e-05	0.608128	0.0126038	FEM
NONHSAG110453.1	0.883155	[0.44533472; 1.32097614]	7.69718e-05	0	0.545706	FEM
NONHSAG102326.2	-0.894794	[-1.33881740; -0.45077041]	7.82224e-05	0.329425	0.165041	FEM
NONHSAG010362.2	0.87813	[0.44226887; 1.31399027]	7.85385e-05	0	0.715758	FEM
NONHSAG106595.1	0.877537	[0.44073849; 1.31433632]	8.2274e-05	0	0.620236	FEM
NONHSAG006482.3	-0.878563	[-1.31684604; -0.44027952]	8.53256e-05	0	0.484919	FEM
NONHSAG020103.2	0.876071	[0.43841141; 1.31373153]	8.73208e-05	0	0.531562	FEM
NONHSAG107651.1	0.877977	[0.43925768; 1.31669670]	8.76697e-05	0	0.444803	FEM
NONHSAG107518.1	0.880115	[0.43960371; 1.32062667]	9.00448e-05	0.146545	0.315123	FEM
NONHSAG095151.1	0.879885	[0.43911646; 1.32065290]	9.12869e-05	0.167288	0.298135	FEM
NONHSAG038290.2	0.891347	[0.44425574; 1.33843851]	9.32295e-05	0.456847	0.0748919	FEM
NONHSAG040494.2	-0.906256	[-1.36084740; -0.45166494]	9.33012e-05	0.609524	0.0123045	FEM
NONHSAG037681.2	0.874194	[0.43531937; 1.31306804]	9.45674e-05	0.014625	0.418143	FEM
NONHSAG074791.2	0.883927	[0.43972903; 1.32812418]	9.60804e-05	0.360502	0.140988	FEM
NONHSAG007902.2	-0.869364	[-1.30673748; -0.43199140]	9.78415e-05	0	0.531143	FEM
NONHSAG008937.2	-0.888949	[-1.33656127; -0.44133587]	9.92103e-05	0.476491	0.0635621	FEM
NONHSAG036047.2	0.861756	[0.42764451; 1.29586804]	9.9914e-05	0	0.814425	FEM
NONHSAG055395.2	0.895491	[0.44410474; 1.34687709]	0.000100914	0.561102	0.025586	FEM
NONHSAG034950.3	0.858395	[0.42562998; 1.29116034]	0.000101205	0	0.91147	FEM
NONHSAG112367.1	0.861735	[0.42666009; 1.29680991]	0.000103562	0	0.723303	FEM
NONHSAG048355.2	0.878122	[0.43474379; 1.32150048]	0.000103673	0.333476	0.161852	FEM
NONHSAG106503.1	-0.854428	[-1.28596707; -0.42288938]	0.00010415	0	0.96903	FEM
NONHSAG021408.3	-0.86261	[-1.29848412; -0.42673574]	0.000104927	0	0.647566	FEM
NONHSAG057266.1	0.870385	[0.42922757; 1.31154189]	0.000110183	0.225575	0.24987	FEM
NONHSAG052307.2	0.879826	[0.43362363; 1.32602840]	0.000111205	0.444766	0.0822747	FEM
NONHSAG004002.2	0.867263	[0.42741829; 1.30710750]	0.000111259	0.137519	0.322466	FEM
NONHSAG025483.2	0.847443	[0.41739833; 1.27748793]	0.000112296	0	0.997303	FEM
NONHSAG016244.2	0.854816	[0.42005193; 1.28957952]	0.000116358	0	0.724646	FEM
NONHSAG011393.2	0.860916	[0.42269031; 1.29914141]	0.000117869	0.00712128	0.423671	FEM
NONHSAG052594.2	0.854965	[0.41963885; 1.29029020]	0.000118421	0	0.669225	FEM
NONHSAG112529.1	0.854163	[0.41914206; 1.28918421]	0.000118864	0	0.696989	FEM
NONHSAG049643.3	-0.870746	[-1.31432429; -0.42716732]	0.000119336	0.358634	0.142405	FEM
NONHSAG108014.1	0.865381	[0.42436032; 1.30640073]	0.000120082	0.231079	0.245299	FEM
NONHSAG105845.1	0.852344	[0.41785716; 1.28683000]	0.00012056	0	0.741903	FEM
NONHSAG104879.1	0.88222	[0.43229741; 1.33214201]	0.00012143	0.54318	0.0320712	FEM
NONHSAG070737.1	0.854549	[0.41869003; 1.29040720]	0.000121641	0	0.615319	FEM
NONHSAG024428.2	-0.845651	[-1.27718122; -0.41412087]	0.00012257	0	0.95263	FEM
NONHSAG049904.2	0.856409	[0.41915314; 1.29366476]	0.00012361	0	0.491031	FEM
NONHSAG066931.1	0.848186	[0.41504881; 1.28132417]	0.000123967	0	0.849431	FEM
NONHSAG106622.1	0.855706	[0.41870319; 1.29270930]	0.000124079	0	0.511031	FEM
NONHSAG032994.2	0.845763	[0.41370460; 1.27782085]	0.000124678	0	0.922893	FEM
NONHSAG081092.1	-0.879855	[-1.32946589; -0.43024452]	0.00012527	0.538747	0.0338077	FEM
NONHSAG066799.1	-0.84448	[-1.27606689; -0.41289345]	0.00012551	0	0.94759	FEM
NONHSAG011391.2	0.86907	[0.42412210; 1.31401725]	0.000129051	0.417475	0.100012	FEM
NONHSAG002942.2	0.843831	[0.41170512; 1.27595681]	0.000129516	0	0.913229	FEM
NONHSAG008714.2	0.858577	[0.41888341; 1.29827047]	0.00012959	0.156296	0.307156	FEM
NONHSAG051859.2	0.859059	[0.41882777; 1.29929088]	0.000130928	0.195461	0.27487	FEM
NONHSAG091684.1	0.859518	[0.41877136; 1.30026400]	0.000132225	0.230018	0.24618	FEM
NONHSAG037936.3	0.867649	[0.42261200; 1.31268539]	0.000132783	0.423295	0.0961136	FEM
NONHSAG043565.2	0.843173	[0.41064799; 1.27569723]	0.000132984	0	0.880288	FEM
NONHSAG016119.2	0.838121	[0.40795905; 1.26828219]	0.000134083	0	0.990039	FEM
NONHSAG044956.3	0.881731	[0.42896243; 1.33449869]	0.000135113	0.598327	0.0148403	FEM
NONHSAG020938.2	0.848191	[0.41237549; 1.28400657]	0.000136413	0	0.593337	FEM
NONHSAG085327.2	0.854586	[0.41534976; 1.29382266]	0.000137062	0.132252	0.326735	FEM
NONHSAG012188.2	0.862581	[0.41840619; 1.30675589]	0.000141066	0.399066	0.112726	FEM
NONHSAG008049.2	0.83551	[0.40522913; 1.26579147]	0.000141299	0	0.984733	FEM
NONHSAG114215.1	0.840113	[0.40724735; 1.27297776]	0.000142376	0	0.843589	FEM
NONHSAG022994.2	-0.840117	[-1.27315928; -0.40707433]	0.000143263	0	0.828343	FEM
NONHSAG041308.2	0.853806	[0.41362813; 1.29398287]	0.000143659	0.207957	0.264505	FEM
NONHSAG028469.2	0.832363	[0.40275094; 1.26197472]	0.00014619	0	0.995133	FEM
NONHSAG076598.1	0.837345	[0.40497542; 1.26971418]	0.000147157	0	0.875349	FEM
NONHSAG021426.2	0.8439	[0.40801660; 1.27978344]	0.000147826	0	0.568505	FEM
NONHSAG091943.2	0.856321	[0.41397108; 1.29867055]	0.000148086	0.329925	0.164646	FEM
NONHSAG010597.2	0.865097	[0.41814928; 1.31204467]	0.000148413	0.487788	0.0574467	FEM
NONHSAG014764.2	-0.848036	[-1.28625870; -0.40981296]	0.000148878	0.0649189	0.380089	FEM
NONHSAG078075.1	0.830371	[0.40114995; 1.25959249]	0.00014955	0	0.998157	FEM
NONHSAG026981.3	0.851417	[0.41099931; 1.29183497]	0.000151207	0.232294	0.24429	FEM
NONHSAG103450.1	0.851318	[0.41058760; 1.29204859]	0.000153123	0.252018	0.22793	FEM
NONHSAG033181.2	0.833586	[0.40156599; 1.26560655]	0.000155677	0	0.890243	FEM
NONHSAG003269.2	0.854908	[0.41171290; 1.29810226]	0.000156342	0.372039	0.132326	FEM
NONHSAG076570.1	0.838423	[0.40298837; 1.27385770]	0.000160682	0	0.589677	FEM
NONHSAG085601.1	0.828911	[0.39841519; 1.25940740]	0.00016069	0	0.968208	FEM
NONHSAG013221.2	0.839181	[0.40308067; 1.27528200]	0.000162207	0	0.529744	FEM
NONHSAG053279.2	0.829189	[0.39802109; 1.26035691]	0.000163692	0	0.934625	FEM
NONHSAG021195.2	0.83555	[0.40095047; 1.27015051]	0.0001644	0	0.660473	FEM
NONHSAG059875.1	0.869582	[0.41725494; 1.32190925]	0.000164543	0.600051	0.0144294	FEM
NONHSAG004320.3	0.851386	[0.40776807; 1.29500396]	0.000168825	0.396068	0.114848	FEM
NONHSAG015030.2	0.827539	[0.39629258; 1.25878476]	0.000169142	0	0.926266	FEM
NONHSAG039320.2	0.834945	[0.39961364; 1.27027550]	0.000170465	0	0.58592	FEM
NONHSAG004324.2	0.825948	[0.39528949; 1.25660712]	0.000170575	0	0.955584	FEM
NONHSAG050900.2	0.827237	[0.39590178; 1.25857308]	0.000170602	0	0.91961	FEM
NONHSAG024241.2	0.833791	[0.39894233; 1.26863936]	0.000171168	0	0.628861	FEM
NONHSAG057885.1	0.86129	[0.41177453; 1.31080556]	0.000173037	0.554359	0.0279252	FEM
NONHSAG049109.2	-0.823341	[-1.25324193; -0.39343987]	0.000174197	0	0.981222	FEM
NONHSAG072860.1	0.83407	[0.39836162; 1.26977782]	0.00017543	0	0.546307	FEM
NONHSAG085349.1	0.824482	[0.39319460; 1.25577014]	0.000179045	0	0.915564	FEM
NONHSAG114268.1	0.847577	[0.40409377; 1.29106062]	0.000179737	0.397327	0.113955	FEM
NONHSAG111599.1	0.836644	[0.39868409; 1.27460410]	0.000180949	0.0864988	0.363262	FEM
NONHSAG033663.3	0.829625	[0.39530889; 1.26394029]	0.000181137	0	0.664401	FEM
NONHSAG065774.1	0.846892	[0.40278529; 1.29099903]	0.000185761	0.422149	0.0968767	FEM
NONHSAG072926.1	0.8298	[0.39463086; 1.26496960]	0.000185922	0	0.581187	FEM
NONHSAG103800.1	0.821077	[0.39020288; 1.25195049]	0.000187721	0	0.933141	FEM
NONHSAG024614.2	0.84188	[0.39977973; 1.28398053]	0.000189682	0.348021	0.150531	FEM
NONHSAG107839.1	0.850986	[0.40393615; 1.29803557]	0.000190738	0.507356	0.047586	FEM
NONHSAG105482.1	0.84483	[0.40091639; 1.28874434]	0.000191363	0.418323	0.099441	FEM
NONHSAG061345.1	0.839265	[0.39753395; 1.28099507]	0.000196172	0.335545	0.16023	FEM
NONHSAG010375.2	0.845891	[0.40059175; 1.29119035]	0.000196699	0.463783	0.0707935	FEM
NONHSAG111379.1	0.835446	[0.39540469; 1.27548775]	0.000198293	0.251129	0.228666	FEM
NONHSAG110355.1	0.833394	[0.39423839; 1.27254877]	0.000199593	0.197015	0.273581	FEM
NONHSAG009880.2	-0.838426	[-1.28024712; -0.39660555]	0.000199683	0.341655	0.155461	FEM
NONHSAG020165.2	0.829609	[0.39184061; 1.26737653]	0.000203709	0.0960027	0.355765	FEM
NONHSAG066802.1	0.843628	[0.39836615; 1.28888979]	0.000204356	0.465931	0.0695455	FEM
NONHSAG035335.2	0.833413	[0.39346999; 1.27335515]	0.00020485	0.250035	0.229573	FEM
NONHSAG058633.1	0.824222	[0.38900409; 1.25944080]	0.00020573	0	0.554248	FEM
NONHSAG069273.1	-0.835586	[-1.27689303; -0.39427943]	0.000206332	0.322204	0.170757	FEM
NONHSAG048101.3	0.82302	[0.38800914; 1.25803116]	0.000208716	0	0.568114	FEM
NONHSAG083016.1	0.810271	[0.38192297; 1.23861906]	0.000209256	0	0.998571	FEM
NONHSAG108354.1	0.835949	[0.39401521; 1.27788224]	0.000209332	0.351959	0.147502	FEM
NONHSAG099722.1	0.82209	[0.38722133; 1.25695967]	0.000211185	0	0.579442	FEM
NONHSAG050899.2	0.8422	[0.39662423; 1.28777511]	0.000211664	0.477082	0.0632348	FEM
NONHSAG081089.1	0.832245	[0.39190384; 1.27258571]	0.00021189	0.277333	0.207056	FEM
NONHSAG050627.2	0.838881	[0.39495280; 1.28280876]	0.00021242	0.42811	0.0929342	FEM
NONHSAG000920.2	0.837406	[0.39345444; 1.28135698]	0.000218109	0.431165	0.090939	FEM
NONHSAG087631.2	0.854119	[0.40121489; 1.30702343]	0.000218758	0.61995	0.0102174	FEM
NONHSAG093883.1	0.825209	[0.38753309; 1.26288404]	0.000219496	0.105228	0.34844	FEM
NONHSAG050533.3	0.829349	[0.38943174; 1.26926574]	0.000219827	0.259099	0.222074	FEM
NONHSAG021575.3	0.810909	[0.38054400; 1.24127432]	0.000221536	0	0.938919	FEM
NONHSAG104808.1	0.841648	[0.39484682; 1.28844927]	0.000222419	0.51141	0.0456627	FEM
NONHSAG020759.2	0.807263	[0.37853655; 1.23599021]	0.000223773	0	0.993302	FEM
NONHSAG030236.2	0.833007	[0.39033897; 1.27567436]	0.000225754	0.389496	0.119547	FEM
NONHSAG005163.2	0.826089	[0.38702742; 1.26515036]	0.000226276	0.211974	0.261169	FEM
NONHSAG043569.2	0.812858	[0.38076059; 1.24495531]	0.000226792	0	0.812743	FEM
NONHSAG102803.1	0.818959	[0.38354657; 1.25437129]	0.000227335	0	0.515679	FEM
NONHSAG086966.1	0.829053	[0.38819100; 1.26991489]	0.000227955	0.313439	0.177749	FEM
NONHSAG047656.2	-0.815951	[-1.25001761; -0.38188432]	0.000229265	0	0.633462	FEM
NONHSAG039355.2	0.812827	[0.38019891; 1.24545470]	0.000230982	0	0.762872	FEM
NONHSAG111726.1	0.821517	[0.38401465; 1.25901987]	0.000232891	0.102374	0.350711	FEM
NONHSAG006259.2	0.815393	[0.38084926; 1.24993746]	0.000235244	0	0.583945	FEM
NONHSAG015660.2	-0.810588	[-1.24267141; -0.37850535]	0.000236027	0	0.805229	FEM
NONHSAG111468.1	0.801522	[0.37377690; 1.22926725]	0.000239993	0	0.999608	FEM
NONHSAG113210.1	0.830498	[0.38716838; 1.27382687]	0.000240935	0.419343	0.0987549	FEM
NONHSAG002443.2	0.816101	[0.38045451; 1.25174780]	0.000240954	0	0.482668	FEM
NONHSAG058911.1	0.808304	[0.37681398; 1.23979333]	0.000240998	0	0.850037	FEM
NONHSAG029467.2	-0.817541	[-1.25431920; -0.38076300]	0.000243846	0.0488728	0.392414	FEM
NONHSAG052687.2	0.811634	[0.37791758; 1.24535021]	0.000244607	0	0.650833	FEM
NONHSAG004698.3	0.812339	[0.37819568; 1.24648313]	0.000245015	0	0.611118	FEM
NONHSAG011274.2	-0.802954	[-1.23219506; -0.37371327]	0.000245941	0	0.976145	FEM
NONHSAG073489.1	0.822625	[0.38283082; 1.26241837]	0.000246242	0.268665	0.214181	FEM
NONHSAG011674.2	0.812056	[0.37766509; 1.24644738]	0.00024826	0	0.58572	FEM
NONHSAG060351.1	0.840255	[0.39074408; 1.28976516]	0.000248539	0.572793	0.0218184	FEM
NONHSAG066673.1	0.809853	[0.37648810; 1.24321877]	0.000249513	0	0.678487	FEM
NONHSAG020017.2	-0.806598	[-1.23831096; -0.37488417]	0.000250261	0	0.82353	FEM
NONHSAG004237.2	0.810483	[0.37660865; 1.24435660]	0.000250932	0	0.630378	FEM
NONHSAG107759.1	0.812907	[0.37766941; 1.24814518]	0.000251475	0	0.508711	FEM
NONHSAG022993.2	-0.816518	[-1.25387510; -0.37916119]	0.000253006	0.108298	0.345992	FEM
NONHSAG091606.1	0.817026	[0.37911242; 1.25493870]	0.000255362	0.154006	0.30903	FEM
NONHSAG061321.1	0.807945	[0.37449582; 1.24139346]	0.000258768	0	0.6624	FEM
NONHSAG049031.2	-0.827641	[-1.27246055; -0.38282092]	0.00026551	0.473168	0.0654174	FEM
NONHSAG004954.2	-0.81478	[-1.25274495; -0.37681454]	0.000266006	0.165384	0.299701	FEM
NONHSAG014722.2	-0.830316	[-1.27666803; -0.38396411]	0.000266307	0.512336	0.0452295	FEM
NONHSAG110057.1	-0.801575	[-1.23294830; -0.37020256]	0.00027046	0	0.835995	FEM
NONHSAG015966.2	-0.798634	[-1.22862933; -0.36863791]	0.0002723	0	0.931569	FEM
NONHSAG088219.1	0.818823	[0.37788553; 1.25975956]	0.000272923	0.338878	0.157624	FEM
NONHSAG078247.1	0.798315	[0.36825963; 1.22837028]	0.000274377	0	0.927068	FEM
NONHSAG053842.3	-0.807695	[-1.24292274; -0.37246653]	0.000275446	0	0.490022	FEM
NONHSAG065878.1	0.798137	[0.36783857; 1.22843572]	0.000277446	0	0.910437	FEM
NONHSAG094046.1	0.830195	[0.38254322; 1.27784725]	0.000278059	0.543361	0.0320013	FEM
NONHSAG085990.1	0.828366	[0.38156018; 1.27517138]	0.00027929	0.525604	0.039263	FEM
NONHSAG001503.3	-0.796115	[-1.22562248; -0.36660657]	0.00028019	0	0.952613	FEM
NONHSAG094939.1	0.813791	[0.37441561; 1.25316648]	0.000283177	0.26571	0.216617	FEM
NONHSAG056052.2	-0.796366	[-1.22655109; -0.36618121]	0.000285197	0	0.91342	FEM
NONHSAG108048.1	0.817039	[0.37533897; 1.25873893]	0.00028837	0.377051	0.128615	FEM
NONHSAG044331.2	0.800052	[0.36743236; 1.23267119]	0.000289334	0	0.713374	FEM
NONHSAG105533.1	0.793065	[0.36410405; 1.22202506]	0.000290465	0	0.971841	FEM
NONHSAG084468.2	-0.791988	[-1.22042657; -0.36354936]	0.000291039	0	0.986965	FEM
NONHSAG006596.2	0.819324	[0.37607926; 1.26256832]	0.000291207	0.433285	0.0895646	FEM
NONHSAG016409.2	0.802803	[0.36844472; 1.23716066]	0.000291688	0	0.552449	FEM
NONHSAG076108.1	0.79566	[0.36508741; 1.22623161]	0.000292438	0	0.883192	FEM
NONHSAG114192.1	0.809832	[0.37118208; 1.24848289]	0.000296276	0.229894	0.246283	FEM
NONHSAG064370.1	0.796181	[0.36492320; 1.22743969]	0.000296295	0	0.82778	FEM
NONHSAG008425.2	0.822465	[0.37690675; 1.26802308]	0.000296884	0.500254	0.051055	FEM
NONHSAG001148.2	0.793929	[0.36312531; 1.22473333]	0.000303743	0	0.858485	FEM
NONHSAG105919.1	0.792853	[0.36210488; 1.22360047]	0.000308972	0	0.860517	FEM
NONHSAG038292.2	0.815157	[0.37221264; 1.25810154]	0.000309738	0.428752	0.0925131	FEM
NONHSAG026310.3	-0.804652	[-1.24228529; -0.36701783]	0.000313674	0.172101	0.294174	FEM
NONHSAG098626.1	0.80731	[0.36765242; 1.24696797]	0.000319444	0.297816	0.190343	FEM
NONHSAG079435.1	0.785354	[0.35727579; 1.21343230]	0.000323367	0	0.989178	FEM
NONHSAG011276.2	-0.819159	[-1.26601177; -0.37230579]	0.000326869	0.535899	0.034951	FEM
NONHSAG111679.1	0.785292	[0.35684473; 1.21373868]	0.000327591	0	0.979245	FEM
NONHSAG079073.1	0.807176	[0.36675232; 1.24759971]	0.00032797	0.337321	0.15884	FEM
NONHSAG043566.2	0.804762	[0.36558214; 1.24394264]	0.000328727	0.276038	0.208119	FEM
NONHSAG058762.1	0.810564	[0.36804955; 1.25307853]	0.000330453	0.420076	0.0982629	FEM
NONHSAG090751.1	0.79244	[0.35887825; 1.22600138]	0.000340479	0	0.588682	FEM
NONHSAG045292.2	0.792957	[0.35902234; 1.22689156]	0.00034145	0	0.5556	FEM
NONHSAG010420.2	0.812487	[0.36786276; 1.25711025]	0.000341469	0.48603	0.0583784	FEM
NONHSAG001461.2	0.796484	[0.36056243; 1.23240525]	0.00034206	0.0479962	0.393082	FEM
NONHSAG019422.2	-0.816939	[-1.26448746; -0.36939007]	0.000346616	0.553309	0.0283005	FEM
NONHSAG005711.3	0.794205	[0.35873345; 1.22967700]	0.000350749	0.00930614	0.422066	FEM
NONHSAG048691.3	-0.804207	[-1.24533148; -0.36308269]	0.000352584	0.375195	0.129986	FEM
NONHSAG058510.1	0.791767	[0.35728312; 1.22625077]	0.000354618	0	0.499513	FEM
NONHSAG067488.1	0.801593	[0.36122105; 1.24196570]	0.000360108	0.346015	0.15208	FEM
NONHSAG056061.1	0.796989	[0.35899944; 1.23497833]	0.000361753	0.221069	0.253614	FEM
NONHSAG021823.2	0.783548	[0.35287670; 1.21421887]	0.000362534	0	0.835576	FEM
NONHSAG109538.1	-0.806804	[-1.25075700; -0.36285080]	0.00036812	0.473303	0.0653415	FEM
NONHSAG032650.2	0.78883	[0.35412344; 1.22353755]	0.000375591	0	0.469233	FEM
NONHSAG108212.1	0.792817	[0.35577745; 1.22985686]	0.000377172	0.162873	0.301763	FEM
NONHSAG106307.1	-0.788363	[-1.22357408; -0.35315279]	0.000384578	0.00612563	0.424402	FEM
NONHSAG021800.2	-0.80924	[-1.25618060; -0.36230011]	0.000386959	0.547291	0.0305076	FEM
NONHSAG111136.1	0.796227	[0.35624068; 1.23621329]	0.000389734	0.337771	0.158489	FEM
NONHSAG111142.1	0.781877	[0.34957414; 1.21418016]	0.000392734	0	0.673155	FEM
NONHSAG000708.2	-0.808759	[-1.25595278; -0.36156521]	0.000393061	0.553307	0.0283011	FEM
NONHSAG015536.3	0.772527	[0.34506240; 1.19999125]	0.000396846	0	0.99159	FEM
NONHSAG085559.1	0.778992	[0.34794960; 1.21003438]	0.000396854	0	0.785528	FEM
NONHSAG079324.1	0.777913	[0.34726336; 1.20856287]	0.00039939	0	0.818172	FEM
NONHSAG024123.2	-0.78661	[-1.22238720; -0.35083206]	0.000403262	0.0741451	0.372929	FEM
NONHSAG030121.2	0.793936	[0.35399355; 1.23387783]	0.000404565	0.340234	0.156567	FEM
NONHSAG005251.2	0.795811	[0.35475399; 1.23686883]	0.000405499	0.386771	0.121514	FEM
NONHSAG035946.2	0.770882	[0.34361414; 1.19814899]	0.000405838	0	0.99372	FEM
NONHSAG030194.2	-0.785646	[-1.22116914; -0.35012281]	0.000406743	0.0523027	0.389793	FEM
NONHSAG014160.2	0.803922	[0.35816810; 1.24967677]	0.000407961	0.52507	0.0394944	FEM
NONHSAG034320.2	0.779046	[0.34692044; 1.21117110]	0.000410043	0	0.679136	FEM
NONHSAG092985.1	0.773256	[0.34395079; 1.20256068]	0.000415067	0	0.911895	FEM
NONHSAG034136.2	0.780274	[0.34704502; 1.21350341]	0.000415421	0	0.575223	FEM
NONHSAG013411.2	0.774109	[0.34417880; 1.20403888]	0.000417022	0	0.866878	FEM
NONHSAG043245.2	0.781522	[0.34705391; 1.21598971]	0.000422441	0	0.464024	FEM
NONHSAG092677.1	-0.775302	[-1.20638872; -0.34421462]	0.000423448	0	0.766185	FEM
NONHSAG083678.1	0.77376	[0.34335936; 1.20416138]	0.000425692	0	0.825703	FEM
NONHSAG100648.1	0.770438	[0.34182374; 1.19905233]	0.000426502	0	0.947334	FEM
NONHSAG076243.1	0.782851	[0.34723890; 1.21846382]	0.000427705	0.0716486	0.374872	FEM
NONHSAG108198.1	0.775965	[0.34409953; 1.20783000]	0.000428822	0	0.693559	FEM
NONHSAG070293.1	0.770265	[0.34148326; 1.19904575]	0.00043	0	0.937049	FEM
NONHSAG006904.2	0.779505	[0.34519098; 1.21381850]	0.000435139	0	0.471437	FEM
NONHSAG107057.1	0.771748	[0.34156281; 1.20193269]	0.000437735	0	0.838029	FEM
NONHSAG064515.1	0.781992	[0.34562138; 1.21836230]	0.000444093	0.143455	0.317641	FEM
NONHSAG023144.2	-0.789872	[-1.23093331; -0.34881111]	0.000448011	0.396956	0.114218	FEM
NONHSAG095083.1	0.772422	[0.34103421; 1.20380900]	0.00044898	0	0.727268	FEM
NONHSAG107118.1	-0.768172	[-1.19723750; -0.33910564]	0.000449701	0	0.914948	FEM
NONHSAG025410.2	-0.776224	[-1.20999026; -0.34245675]	0.000452491	0	0.509227	FEM
NONHSAG073857.1	0.772665	[0.34060965; 1.20472021]	0.000456331	0	0.661988	FEM
NONHSAG111089.1	0.778699	[0.34325951; 1.21413766]	0.000456468	0.0706937	0.375614	FEM
NONHSAG052531.2	0.800455	[0.35265411; 1.24825663]	0.000459106	0.572421	0.0219329	FEM
NONHSAG031481.2	-0.775019	[-1.20889518; -0.34114268]	0.00046337	0	0.494707	FEM
NONHSAG103359.1	0.783361	[0.34401970; 1.22270156]	0.000474505	0.331901	0.16309	FEM
NONHSAG041512.2	0.785033	[0.34380608; 1.22626039]	0.000488033	0.410873	0.104507	FEM
NONHSAG079637.2	0.790934	[0.34625337; 1.23561407]	0.000489994	0.511575	0.0455855	FEM
NONHSAG083923.1	0.760844	[0.33300997; 1.18867833]	0.000491053	0	0.967192	FEM
NONHSAG110525.1	0.761543	[0.33312712; 1.18995959]	0.000493881	0	0.939744	FEM
NONHSAG057106.1	0.769971	[0.33678949; 1.20315284]	0.000494241	0	0.541198	FEM
NONHSAG031997.2	0.777352	[0.33993953; 1.21476358]	0.000495393	0.234547	0.242419	FEM
NONHSAG056258.1	0.768463	[0.33580060; 1.20112534]	0.000499159	0	0.58551	FEM
NONHSAG000392.2	0.774498	[0.33841209; 1.21058490]	0.000499544	0.144423	0.316852	FEM
NONHSAG044006.2	0.768554	[0.33581011; 1.20129754]	0.000499612	0	0.577538	FEM
NONHSAG028512.2	0.75585	[0.32992543; 1.18177494]	0.000504727	0	0.999727	FEM
NONHSAG109499.1	0.769301	[0.33567036; 1.20293256]	0.000506641	0	0.496584	FEM
NONHSAG009591.2	0.766104	[0.33413608; 1.19807120]	0.000508759	0	0.644633	FEM
NONHSAG077384.1	0.769289	[0.33549931; 1.20307847]	0.000509155	0	0.482365	FEM
NONHSAG012745.2	-0.785085	[-1.22794814; -0.34222266]	0.000511631	0.467057	0.0688957	FEM
NONHSAG003987.2	0.766101	[0.33394172; 1.19825983]	0.000511714	0	0.626223	FEM
NONHSAG002643.2	0.778227	[0.33920808; 1.21724498]	0.000512005	0.325568	0.168088	FEM
NONHSAG064359.2	-0.780165	[-1.22041128; -0.33991865]	0.000514032	0.379132	0.127084	FEM
NONHSAG019254.2	0.762617	[0.33221585; 1.19301738]	0.000514913	0	0.786096	FEM
NONHSAG061567.1	-0.793851	[-1.24217448; -0.34552843]	0.000519301	0.587183	0.0176778	FEM
NONHSAG067926.1	0.75478	[0.32849617; 1.18106344]	0.000519712	0	0.997992	FEM
NONHSAG066927.1	0.765447	[0.33303455; 1.19785999]	0.000521335	0	0.598563	FEM
NONHSAG041574.2	0.79394	[0.34479684; 1.24308220]	0.000530925	0.601282	0.0141407	FEM
NONHSAG049332.3	-0.753877	[-1.18056476; -0.32718929]	0.000534284	0	0.992759	FEM
NONHSAG065148.2	0.787278	[0.34133885; 1.23321667]	0.000539655	0.545181	0.0313045	FEM
NONHSAG029236.2	-0.761513	[-1.19297480; -0.33005155]	0.000541532	0	0.677768	FEM
NONHSAG088752.1	-0.756432	[-1.18506719; -0.32779592]	0.000542395	0	0.913898	FEM
NONHSAG049179.2	0.768282	[0.33288379; 1.20367946]	0.000543153	0.105708	0.348058	FEM
NONHSAG104837.1	0.760544	[0.32912259; 1.19196601]	0.000549797	0	0.678582	FEM
NONHSAG087519.1	0.77709	[0.33611206; 1.21806801]	0.00055253	0.413481	0.102723	FEM
NONHSAG114266.1	-0.760821	[-1.19269088; -0.32895130]	0.000554565	0	0.634938	FEM
NONHSAG049805.2	0.765402	[0.33074903; 1.20005569]	0.000557562	0.0435785	0.396443	FEM
NONHSAG103651.1	0.773215	[0.33373988; 1.21268978]	0.000563844	0.357217	0.143483	FEM
NONHSAG101568.1	0.761367	[0.32860660; 1.19412744]	0.000564168	0	0.546785	FEM
NONHSAG079841.1	-0.750157	[-1.17655967; -0.32375521]	0.000564393	0	0.995036	FEM
NONHSAG060561.1	0.766538	[0.33041748; 1.20265878]	0.000571161	0.1724	0.293928	FEM
NONHSAG008910.2	0.760285	[0.32757889; 1.19299054]	0.000573572	0	0.550932	FEM
NONHSAG038927.2	0.776584	[0.33452706; 1.21864160]	0.000574808	0.452299	0.0776356	FEM
NONHSAG036286.2	0.777005	[0.33456095; 1.21944815]	0.000577247	0.464108	0.0706042	FEM
NONHSAG041903.3	-0.763917	[-1.19909809; -0.32873607]	0.000580457	0.101339	0.351533	FEM
NONHSAG043384.2	0.758637	[0.32643973; 1.19083473]	0.000580871	0	0.593931	FEM
NONHSAG043271.3	0.753973	[0.32413665; 1.18380907]	0.000585978	0	0.808543	FEM
NONHSAG025805.2	0.753836	[0.32406056; 1.18361176]	0.000586278	0	0.813587	FEM
NONHSAG043847.2	0.757229	[0.32547333; 1.18898522]	0.000587069	0	0.631612	FEM
NONHSAG067472.1	0.781555	[0.33592115; 1.22718910]	0.000587202	0.543553	0.0319273	FEM
NONHSAG050396.3	-0.755754	[-1.18670218; -0.32480521]	0.000587655	0	0.707426	FEM
NONHSAG007400.2	0.756058	[0.32451593; 1.18759912]	0.000594953	0	0.649517	FEM
NONHSAG021265.2	0.770205	[0.33054103; 1.20986835]	0.000595762	0.371128	0.133004	FEM
NONHSAG046838.2	-0.754061	[-1.18479788; -0.32332453]	0.000600834	0	0.722337	FEM
NONHSAG017813.2	0.757006	[0.32457944; 1.18943342]	0.000600973	0	0.565116	FEM
NONHSAG039679.2	0.751489	[0.32210418; 1.18087459]	0.000602919	0	0.840167	FEM
NONHSAG043293.2	0.750988	[0.32173064; 1.18024533]	0.000605742	0	0.849662	FEM
NONHSAG037102.2	0.761737	[0.32629037; 1.19718323]	0.000606536	0.132385	0.326628	FEM
NONHSAG018601.3	0.768106	[0.32838115; 1.20783026]	0.000617736	0.377349	0.128395	FEM
NONHSAG051466.2	-0.750109	[-1.17964598; -0.32057113]	0.000619839	0	0.822282	FEM
NONHSAG016861.2	0.755622	[0.32285291; 1.18839143]	0.000621185	0	0.526843	FEM
NONHSAG050902.2	0.769957	[0.32890563; 1.21100740]	0.00062246	0.426653	0.0938914	FEM
NONHSAG006478.2	0.772387	[0.32969589; 1.21507848]	0.000626864	0.47727	0.0631304	FEM
NONHSAG064374.1	0.750387	[0.32020606; 1.18056809]	0.00062868	0	0.763179	FEM
NONHSAG114122.1	0.767788	[0.32755819; 1.20801846]	0.000629997	0.398718	0.112971	FEM
NONHSAG071539.1	0.760605	[0.32444331; 1.19676744]	0.000630913	0.192981	0.276925	FEM
NONHSAG078047.1	0.741622	[0.31628372; 1.16696001]	0.000632069	0	0.999825	FEM
NONHSAG110508.1	0.751276	[0.32032732; 1.18222454]	0.000633426	0	0.690508	FEM
NONHSAG011930.2	0.751921	[0.32039967; 1.18344321]	0.000637174	0	0.635827	FEM
NONHSAG045117.3	0.758313	[0.32294557; 1.19368085]	0.000640442	0.136914	0.322957	FEM
NONHSAG086317.2	-0.741955	[-1.16858642; -0.31532374]	0.00065288	0	0.984112	FEM
NONHSAG104197.1	0.758937	[0.32249995; 1.19537449]	0.000653647	0.217359	0.256696	FEM
NONHSAG112153.1	0.758725	[0.32233931; 1.19510980]	0.000654963	0.214378	0.259173	FEM
NONHSAG014373.2	0.754251	[0.32030678; 1.18819426]	0.000657451	0.0133634	0.419075	FEM
NONHSAG071675.2	-0.764494	[-1.20436640; -0.32462158]	0.000658109	0.389451	0.119579	FEM
NONHSAG071629.1	-0.741334	[-1.16803258; -0.31463471]	0.00066105	0	0.981405	FEM
NONHSAG046731.2	0.746448	[0.31672450; 1.17617140]	0.000662602	0	0.792272	FEM
NONHSAG082567.1	0.772176	[0.32758680; 1.21676571]	0.000663614	0.528113	0.0381865	FEM
NONHSAG025867.2	0.750024	[0.31816597; 1.18188162]	0.000664053	0	0.595283	FEM
NONHSAG066582.1	0.75321	[0.31940867; 1.18701056]	0.00066613	0.00213441	0.427323	FEM
NONHSAG112667.1	0.746244	[0.31637088; 1.17611733]	0.000667753	0	0.777741	FEM
NONHSAG108743.1	-0.740036	[-1.16634360; -0.31372768]	0.00066797	0	0.990271	FEM
NONHSAG111725.1	0.765031	[0.32343611; 1.20662685]	0.000684894	0.452137	0.0777342	FEM
NONHSAG054961.2	0.738587	[0.31215764; 1.16501553]	0.000686854	0	0.986211	FEM
NONHSAG046788.2	0.7535	[0.31839246; 1.18860712]	0.000688188	0.130429	0.32821	FEM
NONHSAG092290.1	-0.74248	[-1.17166617; -0.31329316]	0.00069704	0	0.828251	FEM
NONHSAG076872.1	0.737222	[0.31097391; 1.16347077]	0.000699084	0	0.989345	FEM
NONHSAG085317.1	-0.738523	[-1.16579222; -0.31125318]	0.000704551	0	0.954865	FEM
NONHSAG105986.1	-0.743829	[-1.17429876; -0.31335829]	0.000707205	0	0.710011	FEM
NONHSAG041543.2	0.748675	[0.31537374; 1.18197671]	0.000707736	0	0.455582	FEM
NONHSAG004563.2	0.755344	[0.31800708; 1.19268191]	0.00071126	0.283001	0.202412	FEM
NONHSAG072146.1	-0.769656	[-1.21532913; -0.32398332]	0.000712228	0.554736	0.0277912	FEM
NONHSAG044101.2	0.763178	[0.32096068; 1.20539581]	0.000718125	0.474123	0.0648816	FEM
NONHSAG009101.2	0.738206	[0.31045314; 1.16595866]	0.000718233	0	0.92701	FEM
NONHSAG047370.2	-0.741275	[-1.17082784; -0.31172146]	0.000718691	0	0.790004	FEM
NONHSAG096323.1	0.748086	[0.31451896; 1.18165280]	0.000720055	0	0.43084	FEM
NONHSAG009876.2	0.741124	[0.31142729; 1.17082102]	0.000723461	0	0.776037	FEM
NONHSAG004731.2	0.73599	[0.30912105; 1.16285951]	0.000726572	0	0.968737	FEM
NONHSAG018582.2	0.73555	[0.30870767; 1.16239194]	0.000731366	0	0.969144	FEM
NONHSAG081909.1	0.746002	[0.31306437; 1.17893882]	0.000731986	0	0.479043	FEM
NONHSAG018093.3	0.737029	[0.30919515; 1.16486355]	0.000734173	0	0.918579	FEM
NONHSAG007225.2	0.744237	[0.31221099; 1.17626209]	0.000734333	0	0.556949	FEM
NONHSAG109874.1	-0.753098	[-1.19041621; -0.31577923]	0.000737411	0.287012	0.199133	FEM
NONHSAG006633.2	0.761161	[0.31907249; 1.20324922]	0.000739207	0.472488	0.0658006	FEM
NONHSAG097344.2	0.750416	[0.31453744; 1.18629488]	0.000739851	0.20078	0.27046	FEM
NONHSAG111107.1	0.737569	[0.30904562; 1.16609275]	0.000742119	0	0.869155	FEM
NONHSAG070773.1	-0.737314	[-1.16569000; -0.30893729]	0.000742146	0	0.880047	FEM
NONHSAG049045.2	0.761303	[0.31886320; 1.20374235]	0.000744732	0.482739	0.0601423	FEM
NONHSAG025185.2	0.748203	[0.31332022; 1.18308593]	0.000745914	0.128492	0.329776	FEM
NONHSAG024476.2	0.74054	[0.31005124; 1.17102957]	0.000747191	0	0.695935	FEM
NONHSAG010449.2	-0.742702	[-1.17447760; -0.31092598]	0.000747831	0	0.576147	FEM
NONHSAG076866.1	0.739389	[0.30946873; 1.16930835]	0.000749326	0	0.748081	FEM
NONHSAG019936.3	-0.749984	[-1.18606603; -0.31390159]	0.000749363	0.216407	0.257487	FEM
NONHSAG041086.2	0.738943	[0.30921878; 1.16866632]	0.000750678	0	0.765198	FEM
NONHSAG018080.2	0.748116	[0.31298636; 1.18324553]	0.00075218	0.149826	0.312446	FEM
NONHSAG005146.2	-0.746264	[-1.18048778; -0.31203984]	0.000755824	0.074668	0.372522	FEM
NONHSAG033084.2	-0.741617	[-1.17327474; -0.30995986]	0.000758763	0	0.582867	FEM
NONHSAG107690.1	0.741298	[0.30977940; 1.17281684]	0.000759774	0	0.596389	FEM
NONHSAG111042.1	0.766908	[0.32047083; 1.21334542]	0.000759996	0.572448	0.0219245	FEM
NONHSAG069755.1	0.737655	[0.30797926; 1.16733042]	0.000765791	0	0.765887	FEM
NONHSAG006652.3	-0.743081	[-1.17603794; -0.31012442]	0.000768392	0	0.467051	FEM
NONHSAG113894.1	-0.734631	[-1.16266611; -0.30659656]	0.000768421	0	0.898178	FEM
NONHSAG043532.2	0.738129	[0.30789484; 1.16836216]	0.000771939	0	0.712647	FEM
NONHSAG043536.2	0.738129	[0.30789484; 1.16836216]	0.000771939	0	0.712647	FEM
NONHSAG046657.2	0.738129	[0.30789484; 1.16836216]	0.000771939	0	0.712647	FEM
NONHSAG099070.1	0.74554	[0.31098480; 1.18009548]	0.000771974	0.108365	0.345939	FEM
NONHSAG033514.2	0.731915	[0.30529230; 1.15853699]	0.000772171	0	0.9725	FEM
NONHSAG005962.2	-0.744315	[-1.17819022; -0.31044011]	0.000772705	0.0469798	0.393857	FEM
NONHSAG110454.1	0.734761	[0.30631957; 1.16320305]	0.000775693	0	0.867434	FEM
NONHSAG007016.2	0.741597	[0.30906698; 1.17412763]	0.000777933	0	0.500933	FEM
NONHSAG011662.2	0.743427	[0.30977388; 1.17707988]	0.000779148	0.02646	0.409343	FEM
NONHSAG013156.2	0.732356	[0.30513291; 1.15957941]	0.000779769	0	0.945624	FEM
NONHSAG111118.1	0.752687	[0.31358669; 1.19178681]	0.000780133	0.37622	0.129228	FEM
NONHSAG038222.2	0.739478	[0.30800736; 1.17094920]	0.000781814	0	0.593942	FEM
NONHSAG016749.2	0.730313	[0.30416042; 1.15646622]	0.000782473	0	0.985592	FEM
NONHSAG016111.3	0.730153	[0.30389535; 1.15641150]	0.000786913	0	0.982525	FEM
NONHSAG016125.2	0.765937	[0.31875355; 1.21312101]	0.000787668	0.587297	0.0176472	FEM
NONHSAG014500.2	-0.738351	[-1.16956037; -0.30714130]	0.000790597	0	0.615209	FEM
NONHSAG071612.1	0.752448	[0.31295810; 1.19193736]	0.00079163	0.393157	0.116922	FEM
NONHSAG098688.1	0.738733	[0.30678728; 1.17067966]	0.000802072	0	0.545518	FEM
NONHSAG100925.1	0.746005	[0.30962236; 1.18238822]	0.000806195	0.247262	0.23187	FEM
NONHSAG033530.2	0.734223	[0.30444529; 1.16400033]	0.00081273	0	0.742968	FEM
NONHSAG079927.1	0.73289	[0.30386514; 1.16191525]	0.000813362	0	0.810566	FEM
NONHSAG050722.2	-0.736458	[-1.16758184; -0.30533383]	0.000813601	0	0.617437	FEM
NONHSAG110527.1	0.745218	[0.30888136; 1.18155467]	0.000815505	0.245603	0.233245	FEM
NONHSAG062853.1	0.729361	[0.30229808; 1.15642489]	0.000815758	0	0.947933	FEM
NONHSAG051336.2	0.762578	[0.31592455; 1.20923126]	0.000818868	0.579832	0.019725	FEM
NONHSAG033101.2	0.734927	[0.30418818; 1.16566546]	0.000825338	0	0.649531	FEM
NONHSAG006146.2	0.733887	[0.30364286; 1.16413072]	0.000827997	0	0.695815	FEM
NONHSAG109367.1	0.748428	[0.30964381; 1.18721259]	0.00082835	0.369625	0.134126	FEM
NONHSAG041892.3	-0.737759	[-1.17032452; -0.30519274]	0.000829199	0	0.484613	FEM
NONHSAG047803.3	0.728881	[0.30150333; 1.15625783]	0.000829591	0	0.928883	FEM
NONHSAG075003.2	0.737865	[0.30516953; 1.17056038]	0.000830752	0	0.473324	FEM
NONHSAG074658.1	-0.730823	[-1.15957594; -0.30206954]	0.000835136	0	0.828405	FEM
NONHSAG028390.3	0.737118	[0.30461999; 1.16961598]	0.000836335	0	0.488515	FEM
NONHSAG110923.1	0.727195	[0.30034021; 1.15404993]	0.000840565	0	0.954964	FEM
NONHSAG053192.2	-0.764193	[-1.21297811; -0.31540842]	0.000845361	0.614889	0.0111981	FEM
NONHSAG049331.2	-0.75161	[-1.19350778; -0.30971226]	0.000856983	0.477922	0.062771	FEM
NONHSAG072353.1	0.73437	[0.30252996; 1.16621031]	0.000858848	0	0.539992	FEM
NONHSAG070792.1	0.738676	[0.30429566; 1.17305595]	0.000859039	0.116363	0.33954	FEM
NONHSAG009782.2	-0.729718	[-1.15898238; -0.30045419]	0.000862677	0	0.77632	FEM
NONHSAG105358.1	0.737273	[0.30345339; 1.17109256]	0.000865332	0.0679173	0.377768	FEM
NONHSAG113797.1	0.757819	[0.31184692; 1.20379207]	0.0008668	0.570346	0.0225771	FEM
NONHSAG089742.1	0.725235	[0.29840945; 1.15206047]	0.000867499	0	0.952824	FEM
NONHSAG027882.3	0.744083	[0.30603952; 1.18212652]	0.000870471	0.343059	0.154371	FEM
NONHSAG042042.2	-0.723681	[-1.14996467; -0.29739656]	0.000876631	0	0.974069	FEM
NONHSAG109272.1	0.735439	[0.30206728; 1.16881020]	0.000880535	0.0295119	0.407058	FEM
NONHSAG024413.2	0.740067	[0.30377342; 1.17636020]	0.000885237	0.255228	0.225274	FEM
NONHSAG005685.2	-0.72473	[-1.15203896; -0.29742105]	0.000886649	0	0.923824	FEM
NONHSAG076214.1	0.748924	[0.30731303; 1.19053455]	0.000887532	0.47251	0.0657878	FEM
NONHSAG016109.3	0.728697	[0.29897738; 1.15841737]	0.000888417	0	0.729072	FEM
NONHSAG072927.1	0.72863	[0.29871936; 1.15854134]	0.000894111	0	0.710088	FEM
NONHSAG038166.2	-0.723291	[-1.15016457; -0.29641740]	0.000896932	0	0.946669	FEM
NONHSAG079307.1	0.748683	[0.30680742; 1.19055837]	0.000897319	0.48067	0.0612645	FEM
NONHSAG063437.1	0.725498	[0.29728490; 1.15371186]	0.000897857	0	0.857995	FEM
NONHSAG112128.1	0.724508	[0.29674862; 1.15226807]	0.000901124	0	0.891588	FEM
NONHSAG111275.1	0.722228	[0.29580946; 1.14864718]	0.000901257	0	0.966399	FEM
NONHSAG105597.1	0.733307	[0.30015479; 1.16645943]	0.000906027	0.0134255	0.41903	FEM
NONHSAG109617.1	0.722646	[0.29575365; 1.14953835]	0.000906969	0	0.943751	FEM
NONHSAG095926.1	0.741046	[0.30318083; 1.17891095]	0.000909513	0.339995	0.156753	FEM
NONHSAG073818.1	0.73115	[0.29906443; 1.16323555]	0.000911207	0	0.505801	FEM
NONHSAG012141.2	0.724381	[0.29614846; 1.15261348]	0.000914932	0	0.853313	FEM
NONHSAG021969.2	0.748623	[0.30594181; 1.19130414]	0.000917817	0.503386	0.0495094	FEM
NONHSAG004072.2	-0.722513	[-1.14977906; -0.29524773]	0.000918424	0	0.921314	FEM
NONHSAG003630.2	0.720472	[0.29426169; 1.14668203]	0.000922309	0	0.972527	FEM
NONHSAG026464.2	0.722385	[0.29484513; 1.14992511]	0.000927382	0	0.902172	FEM
NONHSAG070734.1	0.731547	[0.29846518; 1.16462979]	0.000930418	0.0124329	0.419762	FEM
NONHSAG015220.2	0.741521	[0.30252103; 1.18052133]	0.000930753	0.390061	0.11914	FEM
NONHSAG056978.1	0.732419	[0.29880096; 1.16603643]	0.000930918	0.0658694	0.379354	FEM
NONHSAG007390.2	0.740177	[0.30179604; 1.17855837]	0.0009352	0.365656	0.137099	FEM
NONHSAG113204.1	0.725017	[0.29545766; 1.15457663]	0.000939251	0	0.731892	FEM
NONHSAG016109.2	0.727568	[0.29637103; 1.15876517]	0.000942503	0	0.575507	FEM
NONHSAG072517.1	-0.723006	[-1.15160867; -0.29440357]	0.000945341	0	0.816209	FEM
NONHSAG029467.3	-0.742432	[-1.18258225; -0.30228120]	0.000946162	0.433128	0.0896662	FEM
NONHSAG041957.2	0.743712	[0.30256499; 1.18485834]	0.000952186	0.46431	0.0704863	FEM
NONHSAG038023.2	0.725337	[0.29480609; 1.15586744]	0.000959601	0	0.635326	FEM
NONHSAG064550.1	0.723561	[0.29401975; 1.15310237]	0.000961302	0	0.727579	FEM
NONHSAG108634.1	0.724071	[0.29396441; 1.15417690]	0.000968228	0	0.673706	FEM
NONHSAG056812.1	0.720451	[0.29219925; 1.14870355]	0.000976119	0	0.839185	FEM
NONHSAG055499.3	-0.718325	[-1.14535942; -0.29129007]	0.000977372	0	0.926076	FEM
NONHSAG106848.1	0.731564	[0.29654675; 1.16658191]	0.000980334	0.189777	0.279577	FEM
NONHSAG094288.1	-0.722965	[-1.15292488; -0.29300583]	0.000981813	0	0.684164	FEM
NONHSAG024264.2	0.724008	[0.29324031; 1.15477580]	0.000986854	0	0.607391	FEM
NONHSAG088467.1	-0.72148	[-1.15079130; -0.29216818]	0.000988151	0	0.743413	FEM
NONHSAG002798.2	0.735738	[0.29771262; 1.17376389]	0.000994239	0.357119	0.143558	FEM
NONHSAG045291.2	0.72699	[0.29413271; 1.15984661]	0.00099531	0.00605906	0.42445	FEM
NONHSAG033390.2	0.726366	[0.29387635; 1.15885494]	0.000995415	0	0.451944	FEM
NONHSAG074531.1	-0.732104	[-1.16807995; -0.29612735]	0.000997301	0.254735	0.225682	FEM
NONHSAG033896.3	-0.743352	[-1.18612754; -0.30057554]	0.000999978	0.51111	0.0458034	FEM
NONHSAG045316.2	0.71807	[0.29025174; 1.14588776]	0.00100274	0	0.868457	FEM
NONHSAG011636.2	0.727776	[0.29414472; 1.16140666]	0.00100356	0.0841892	0.365076	FEM
NONHSAG047335.2	-0.736354	[-1.17510763; -0.29760007]	0.00100388	0.388024	0.120608	FEM
NONHSAG093828.1	0.720854	[0.29132532; 1.15038179]	0.00100416	0	0.719421	FEM
NONHSAG098983.1	0.717279	[0.28976491; 1.14479283]	0.00100734	0	0.890513	FEM
NONHSAG016640.2	0.716138	[0.28925388; 1.14302149]	0.00100872	0	0.930755	FEM
NONHSAG041127.2	-0.713941	[-1.13952487; -0.28835734]	0.00100898	0	0.985098	FEM
NONHSAG107331.1	0.719763	[0.29068104; 1.14884589]	0.00100974	0	0.759932	FEM
NONHSAG007330.2	0.717194	[0.28963809; 1.14475040]	0.00100989	0	0.886933	FEM
NONHSAG031831.2	0.718674	[0.29023345; 1.14711508]	0.00100995	0	0.81574	FEM
NONHSAG076194.1	0.730159	[0.29486910; 1.16544951]	0.00101002	0.2137	0.259736	FEM
NONHSAG034263.3	0.718374	[0.28998757; 1.14675997]	0.00101339	0	0.820725	FEM
NONHSAG063549.1	0.723695	[0.29211671; 1.15527290]	0.0010139	0	0.52764	FEM
NONHSAG048512.2	0.723862	[0.29216968; 1.15555479]	0.0010143	0	0.517492	FEM
NONHSAG027537.2	0.745924	[0.30104520; 1.19080193]	0.00101508	0.557731	0.0267402	FEM
NONHSAG089743.1	0.722905	[0.29156524; 1.15424565]	0.00102031	0	0.547113	FEM
NONHSAG007512.3	0.723579	[0.29177272; 1.15538579]	0.00102208	0	0.505958	FEM
NONHSAG085761.1	0.715102	[0.28834492; 1.14185844]	0.00102234	0	0.936515	FEM
NONHSAG089408.1	-0.748091	[-1.19472112; -0.30146127]	0.00102731	0.589797	0.0169835	FEM
NONHSAG055006.2	0.714944	[0.28798333; 1.14190529]	0.00103069	0	0.92356	FEM
NONHSAG041626.2	0.715527	[0.28821628; 1.14283794]	0.00103074	0	0.900917	FEM
NONHSAG104931.1	0.733847	[0.29554265; 1.17215153]	0.0010322	0.372895	0.13169	FEM
NONHSAG016904.2	0.73418	[0.29557800; 1.17278201]	0.0010349	0.385266	0.122605	FEM
NONHSAG006185.2	0.723717	[0.29136078; 1.15607329]	0.00103504	0	0.456801	FEM
NONHSAG028507.2	0.710474	[0.28602796; 1.13492038]	0.00103508	0	0.999227	FEM
NONHSAG111331.1	0.719997	[0.28984491; 1.15014985]	0.00103555	0	0.654087	FEM
NONHSAG030637.2	-0.720573	[-1.15107981; -0.29006687]	0.00103583	0	0.620958	FEM
NONHSAG057083.1	0.723135	[0.29101984; 1.15524953]	0.00103801	0	0.47649	FEM
NONHSAG109155.1	0.742445	[0.29878510; 1.18610577]	0.00103818	0.533686	0.0358543	FEM
NONHSAG040216.3	-0.717499	[-1.14628928; -0.28870848]	0.00103923	0	0.779045	FEM
NONHSAG049637.2	0.742729	[0.29877667; 1.18668158]	0.00104152	0.540219	0.0332253	FEM
NONHSAG011392.2	0.727953	[0.29260433; 1.16330144]	0.00104788	0.223058	0.251962	FEM
NONHSAG016681.2	0.716399	[0.28789956; 1.14489873]	0.0010496	0	0.803756	FEM
NONHSAG030594.2	0.72576	[0.29149875; 1.16002049]	0.00105417	0.147897	0.31402	FEM
NONHSAG093591.1	0.711211	[0.28558475; 1.13683806]	0.00105621	0	0.981095	FEM
NONHSAG073387.1	0.718784	[0.28860119; 1.14896686]	0.0010569	0	0.646509	FEM
NONHSAG010565.2	0.715912	[0.28743643; 1.14438668]	0.00105723	0	0.804488	FEM
NONHSAG029463.2	-0.722542	[-1.15500590; -0.29007862]	0.00105779	0	0.443666	FEM
NONHSAG022525.2	0.741533	[0.29757541; 1.18549146]	0.00106132	0.54135	0.0327819	FEM
NONHSAG047181.2	0.719992	[0.28886698; 1.15111609]	0.00106314	0	0.558146	FEM
NONHSAG010467.2	-0.733378	[-1.17255750; -0.29419808]	0.00106425	0.409691	0.10532	FEM
NONHSAG108377.1	0.733556	[0.29420511; 1.17290649]	0.00106606	0.415886	0.101088	FEM
NONHSAG052544.2	0.71944	[0.28837308; 1.15050716]	0.00107096	0	0.561766	FEM
NONHSAG110564.1	0.714263	[0.28629106; 1.14223556]	0.00107116	0	0.844342	FEM
NONHSAG010600.2	0.722168	[0.28935850; 1.15497832]	0.00107406	0.0206404	0.413683	FEM
NONHSAG038589.2	-0.746158	[-1.19341253; -0.29890428]	0.0010759	0.601741	0.014034	FEM
NONHSAG026230.2	0.72572	[0.29059340; 1.16084728]	0.00107944	0.214087	0.259414	FEM
NONHSAG112046.1	0.710483	[0.28439967; 1.13656676]	0.00108215	0	0.962816	FEM
NONHSAG094630.1	0.738628	[0.29566111; 1.18159439]	0.00108228	0.520588	0.0414647	FEM
NONHSAG084945.1	0.7084	[0.28321551; 1.13358530]	0.0010925	0	0.989858	FEM
NONHSAG009794.2	0.726904	[0.29060697; 1.16320013]	0.00109267	0.285063	0.200726	FEM
NONHSAG034179.3	0.724023	[0.28933992; 1.15870559]	0.00109602	0.185669	0.282976	FEM
NONHSAG007683.3	0.708565	[0.28308080; 1.13404841]	0.00109844	0	0.982553	FEM
NONHSAG026432.2	0.709292	[0.28320888; 1.13537543]	0.00110328	0	0.96092	FEM
NONHSAG070715.2	0.720881	[0.28778174; 1.15398028]	0.00110488	0.0567019	0.386421	FEM
NONHSAG110025.1	0.735012	[0.29339515; 1.17662789]	0.00110567	0.488321	0.0571658	FEM
NONHSAG109897.1	0.725898	[0.28959300; 1.16220317]	0.00111048	0.287715	0.19856	FEM
NONHSAG102411.1	-0.710546	[-1.13762999; -0.28346232]	0.00111066	0	0.904394	FEM
NONHSAG099380.1	0.719407	[0.28697643; 1.15183828]	0.00111128	0	0.436051	FEM
NONHSAG083594.1	0.711429	[0.28373341; 1.13912367]	0.00111308	0	0.85929	FEM
NONHSAG098802.1	0.71017	[0.28315393; 1.13718640]	0.00111541	0	0.907876	FEM
NONHSAG112388.1	0.713754	[0.28454911; 1.14295793]	0.00111641	0	0.725918	FEM
NONHSAG062841.2	0.714273	[0.28473350; 1.14381179]	0.00111708	0	0.695045	FEM
NONHSAG075200.1	0.727434	[0.28979075; 1.16507824]	0.00112265	0.353863	0.146043	FEM
NONHSAG054653.2	-0.712849	[-1.14182178; -0.28387563]	0.0011258	0	0.745373	FEM
NONHSAG074130.1	0.719055	[0.28627770; 1.15183215]	0.00112787	0.030099	0.406618	FEM
NONHSAG044959.2	0.710565	[0.28276476; 1.13836539]	0.0011319	0	0.847409	FEM
NONHSAG018146.2	0.72104	[0.28685503; 1.15522491]	0.00113423	0.155574	0.307746	FEM
NONHSAG054084.2	0.706579	[0.28109199; 1.13206566]	0.00113454	0	0.980332	FEM
NONHSAG069156.1	0.726407	[0.28893185; 1.16388261]	0.00113597	0.347818	0.150688	FEM
NONHSAG047246.2	0.716637	[0.28490802; 1.14836623]	0.00114013	0	0.489885	FEM
NONHSAG092772.1	-0.720696	[-1.15497691; -0.28641515]	0.00114334	0.16417	0.300698	FEM
NONHSAG039294.2	0.708575	[0.28132816; 1.13582236]	0.00115164	0	0.88714	FEM
NONHSAG108562.1	0.726298	[0.28834612; 1.16425072]	0.0011522	0.369806	0.13399	FEM
NONHSAG067779.1	0.711558	[0.28248233; 1.14063323]	0.00115256	0	0.731557	FEM
NONHSAG114878.1	0.720744	[0.28605747; 1.15543113]	0.00115474	0.19496	0.275285	FEM
NONHSAG026890.3	-0.719947	[-1.15430178; -0.28559206]	0.00115927	0.171966	0.294285	FEM
NONHSAG110604.1	0.726248	[0.28804726; 1.16444822]	0.00116061	0.380779	0.125876	FEM
NONHSAG049486.3	0.710243	[0.28159735; 1.13888944]	0.00116377	0	0.7675	FEM
NONHSAG105346.1	0.727126	[0.28802037; 1.16623122]	0.00117198	0.415716	0.101203	FEM
NONHSAG038531.2	0.713169	[0.28231087; 1.14402672]	0.0011776	0	0.559467	FEM
NONHSAG102100.1	0.722187	[0.28570610; 1.15866763]	0.00118298	0.305248	0.184333	FEM
NONHSAG042433.3	0.719871	[0.28476775; 1.15497468]	0.00118367	0.226724	0.248916	FEM
NONHSAG004315.3	0.723089	[0.28586656; 1.16031243]	0.00118905	0.341539	0.155551	FEM
NONHSAG023353.2	0.708417	[0.28000821; 1.13682606]	0.00119088	0	0.78481	FEM
NONHSAG053763.2	0.710127	[0.28063989; 1.13961394]	0.00119227	0	0.684436	FEM
NONHSAG052134.2	0.733031	[0.28965469; 1.17640682]	0.00119339	0.53547	0.0351252	FEM
NONHSAG090728.1	0.721725	[0.28509001; 1.15835902]	0.00119641	0.314299	0.177061	FEM
NONHSAG013765.2	0.717506	[0.28336325; 1.15164865]	0.0011983	0.162489	0.302079	FEM
NONHSAG095235.1	0.714359	[0.28209742; 1.14662045]	0.00119902	0	0.435734	FEM
NONHSAG102140.1	0.714232	[0.28195609; 1.14650867]	0.00120191	0	0.434089	FEM
NONHSAG096217.2	0.712213	[0.28105430; 1.14337214]	0.00120522	0	0.527918	FEM
NONHSAG106654.1	-0.718647	[-1.15394549; -0.28334776]	0.00121295	0.242694	0.235658	FEM
NONHSAG107433.1	0.71648	[0.28248826; 1.15047138]	0.00121312	0.15319	0.309697	FEM
NONHSAG023966.2	0.71107	[0.28034287; 1.14179636]	0.00121351	0	0.565368	FEM
NONHSAG007853.2	-0.709432	[-1.13918687; -0.27967771]	0.00121414	0	0.65531	FEM
NONHSAG071284.1	0.70438	[0.27764574; 1.13111400]	0.00121543	0	0.913513	FEM
NONHSAG007204.2	0.713986	[0.28139430; 1.14657857]	0.00121665	0.0295355	0.40704	FEM
NONHSAG105483.1	0.719047	[0.28331257; 1.15478182]	0.00121906	0.269056	0.21386	FEM
NONHSAG106757.1	0.708833	[0.27928326; 1.13838235]	0.00121921	0	0.673783	FEM
NONHSAG058781.1	0.705876	[0.27809578; 1.13365552]	0.00121993	0	0.834935	FEM
NONHSAG090523.1	0.705283	[0.27770459; 1.13286138]	0.00122504	0	0.850552	FEM
NONHSAG063021.1	0.715681	[0.28179508; 1.14956634]	0.00122515	0.147383	0.31444	FEM
NONHSAG024469.3	0.719391	[0.28304684; 1.15573478]	0.00123181	0.303363	0.185854	FEM
NONHSAG009159.2	0.702023	[0.27603619; 1.12800902]	0.00123762	0	0.953389	FEM
NONHSAG023271.2	0.715181	[0.28120986; 1.14915189]	0.00123762	0.155988	0.307408	FEM
NONHSAG057624.1	0.700262	[0.27531766; 1.12520646]	0.00123848	0	0.98886	FEM
NONHSAG031321.2	-0.698836	[-1.12295284; -0.27471846]	0.00123975	0	0.99884	FEM
NONHSAG050270.2	0.714094	[0.28060814; 1.14757994]	0.00124326	0.11764	0.338515	FEM
NONHSAG113796.1	0.713534	[0.28004846; 1.14702031]	0.0012543	0.119053	0.33738	FEM
NONHSAG040492.2	-0.701541	[-1.12779760; -0.27528500]	0.00125618	0	0.937544	FEM
NONHSAG069596.1	0.708148	[0.27780056; 1.13849461]	0.0012587	0	0.592099	FEM
NONHSAG080608.1	0.711479	[0.27891848; 1.14403970]	0.00126491	0.0359576	0.402211	FEM
NONHSAG010007.2	-0.709036	[-1.14016040; -0.27791234]	0.00126652	0	0.52017	FEM
NONHSAG111254.1	-0.712085	[-1.14507075; -0.27909866]	0.0012668	0.0773985	0.370392	FEM
NONHSAG104775.1	0.714491	[0.28000523; 1.14897761]	0.001268	0.197203	0.273426	FEM
NONHSAG034870.2	-0.700696	[-1.12689445; -0.27449692]	0.00127142	0	0.938696	FEM
NONHSAG073220.1	0.71415	[0.27965599; 1.14864414]	0.0012751	0.20004	0.271074	FEM
NONHSAG013188.2	0.704181	[0.27534107; 1.13302100]	0.00128891	0	0.72834	FEM
NONHSAG011087.2	0.706729	[0.27628427; 1.13717390]	0.00129069	0	0.577662	FEM
NONHSAG022992.2	-0.715886	[-1.15198467; -0.27978812]	0.00129322	0.296949	0.191046	FEM
NONHSAG108172.1	-0.700838	[-1.12796092; -0.27371599]	0.00129972	0	0.875328	FEM
NONHSAG014542.2	0.706455	[0.27588456; 1.13702603]	0.00130057	0	0.564393	FEM
NONHSAG113166.1	0.704962	[0.27497499; 1.13494995]	0.00131168	0	0.616235	FEM
NONHSAG000275.3	0.703796	[0.27449302; 1.13309991]	0.00131261	0	0.680832	FEM
NONHSAG019016.2	0.700908	[0.27332640; 1.12849029]	0.001314	0	0.836714	FEM
NONHSAG023874.2	-0.727186	[-1.17082370; -0.28354801]	0.00131484	0.546402	0.030842	FEM
NONHSAG022893.2	-0.69611	[-1.12096547; -0.27125543]	0.00132093	0	0.987585	FEM
NONHSAG053227.2	-0.698773	[-1.12533934; -0.27220722]	0.00132391	0	0.910586	FEM
NONHSAG107496.1	0.695787	[0.27087613; 1.12069743]	0.00132975	0	0.985818	FEM
NONHSAG030093.2	0.711727	[0.27692229; 1.14653096]	0.00133521	0.226765	0.248882	FEM
NONHSAG013430.2	-0.708137	[-1.14074868; -0.27552540]	0.00133521	0.0543226	0.388246	FEM
NONHSAG009341.2	0.72457	[0.28187352; 1.16726653]	0.00133675	0.526976	0.0386723	FEM
NONHSAG049370.2	0.694143	[0.27003066; 1.11825567]	0.00133697	0	0.997848	FEM
NONHSAG014666.2	0.697828	[0.27135628; 1.12430067]	0.00134075	0	0.915507	FEM
NONHSAG056827.1	0.706769	[0.27467122; 1.13886742]	0.00134636	0.00365716	0.42621	FEM
NONHSAG045724.2	-0.697052	[-1.12331155; -0.27079234]	0.00134997	0	0.927879	FEM
NONHSAG076681.1	0.699487	[0.27166118; 1.12731196]	0.00135267	0	0.81045	FEM
NONHSAG035205.2	0.70912	[0.27531120; 1.14292935]	0.00135585	0.15995	0.304161	FEM
NONHSAG018563.2	0.719695	[0.27937459; 1.16001518]	0.0013573	0.466853	0.069013	FEM
NONHSAG088269.1	0.696627	[0.27041760; 1.12283682]	0.00135738	0	0.929343	FEM
NONHSAG022967.2	-0.705978	[-1.13813064; -0.27382550]	0.00136516	0.0140917	0.418537	FEM
NONHSAG047839.2	0.703868	[0.27296397; 1.13477202]	0.00136668	0	0.523617	FEM
NONHSAG078226.1	0.696765	[0.27010545; 1.12342450]	0.00137038	0	0.899861	FEM
NONHSAG037114.2	0.711133	[0.27562651; 1.14663944]	0.00137209	0.272754	0.210816	FEM
NONHSAG088177.1	0.701242	[0.27167742; 1.13080634]	0.00137619	0	0.645685	FEM
NONHSAG022589.3	0.698119	[0.27042066; 1.12581708]	0.00137786	0	0.817619	FEM
NONHSAG000715.3	0.700073	[0.27102345; 1.12912269]	0.00138337	0	0.692996	FEM
NONHSAG033290.2	0.698813	[0.27051125; 1.12711564]	0.00138425	0	0.762745	FEM
NONHSAG033990.2	0.711953	[0.27557796; 1.14832895]	0.00138494	0.319583	0.172842	FEM
NONHSAG051619.2	0.694701	[0.26880581; 1.12059693]	0.00138835	0	0.9446	FEM
NONHSAG023919.2	0.704831	[0.27270231; 1.13696016]	0.00138917	0.0162395	0.416949	FEM
NONHSAG105585.1	-0.702983	[-1.13401673; -0.27194935]	0.00139053	0	0.507206	FEM
NONHSAG095684.1	0.699177	[0.27047316; 1.12788013]	0.00139066	0	0.724147	FEM
NONHSAG081145.1	-0.712964	[-1.15022627; -0.27570080]	0.00139439	0.361283	0.140397	FEM
NONHSAG068884.1	-0.711682	[-1.14816152; -0.27520289]	0.00139448	0.325529	0.168119	FEM
NONHSAG088451.1	0.695584	[0.26896868; 1.12219937]	0.00139481	0	0.900092	FEM
NONHSAG002393.2	0.698969	[0.27017559; 1.12776251]	0.00139849	0	0.714222	FEM
NONHSAG090696.1	0.699669	[0.27043734; 1.12890131]	0.00139881	0	0.673386	FEM
NONHSAG023499.2	0.694695	[0.26839760; 1.12099269]	0.00140307	0	0.91979	FEM
NONHSAG110183.1	0.702268	[0.27118733; 1.13334866]	0.00140798	0	0.501937	FEM
NONHSAG077394.1	0.725356	[0.28008546; 1.17062590]	0.00140858	0.580931	0.0194099	FEM
NONHSAG096536.1	0.712184	[0.27495866; 1.14940845]	0.00141003	0.36057	0.140937	FEM
NONHSAG109391.1	0.698166	[0.26951470; 1.12681809]	0.0014112	0	0.726213	FEM
NONHSAG041861.2	0.708839	[0.27340489; 1.14427228]	0.00141945	0.273558	0.210156	FEM
NONHSAG001215.2	-0.694709	[-1.12168046; -0.26773791]	0.00142744	0	0.869242	FEM
NONHSAG009342.2	0.693676	[0.26732676; 1.12002441]	0.00142792	0	0.914182	FEM
NONHSAG050866.2	-0.690675	[-1.11545478; -0.26589452]	0.00143818	0	0.984447	FEM
NONHSAG026202.2	0.699365	[0.26892423; 1.12980660]	0.00144985	0	0.552538	FEM
NONHSAG096785.1	0.694554	[0.26677957; 1.12232807]	0.00146087	0	0.798259	FEM
NONHSAG056657.2	0.709538	[0.27247501; 1.14660012]	0.00146307	0.357599	0.143193	FEM
NONHSAG038380.2	0.698782	[0.26817196; 1.12939194]	0.00146953	0	0.53437	FEM
NONHSAG090998.1	-0.718353	[-1.16116280; -0.27554301]	0.00147463	0.535172	0.0352462	FEM
NONHSAG111893.1	-0.717718	[-1.16020764; -0.27522850]	0.00147723	0.528222	0.0381399	FEM
NONHSAG092721.1	0.693061	[0.26548448; 1.12063777]	0.0014882	0	0.812356	FEM
NONHSAG054558.2	0.702092	[0.26885969; 1.13532421]	0.00149137	0.133586	0.325655	FEM
NONHSAG067888.1	0.713233	[0.27309372; 1.15337312]	0.00149258	0.46874	0.0679295	FEM
NONHSAG095979.1	-0.706743	[-1.14295837; -0.27052709]	0.00149563	0.321244	0.17152	FEM
NONHSAG018047.2	0.692512	[0.26490453; 1.12012011]	0.00150236	0	0.807358	FEM
NONHSAG105481.1	-0.697586	[-1.12832730; -0.26684495]	0.00150238	0	0.517106	FEM
NONHSAG053902.2	0.689879	[0.26382728; 1.11593098]	0.00150506	0	0.924886	FEM
NONHSAG016410.2	0.690609	[0.26409518; 1.11712261]	0.00150549	0	0.89476	FEM
NONHSAG087851.2	-0.704979	[-1.14057209; -0.26938597]	0.00151324	0.291118	0.195786	FEM
NONHSAG096784.1	0.721135	[0.27549624; 1.16677418]	0.00151559	0.590553	0.0167861	FEM
NONHSAG035187.2	-0.685244	[-1.10872923; -0.26175838]	0.00151661	0	0.999491	FEM
NONHSAG075006.1	0.693524	[0.26487271; 1.12217563]	0.0015185	0	0.71006	FEM
NONHSAG036516.2	0.696866	[0.26614224; 1.12758922]	0.00151876	0	0.517281	FEM
NONHSAG114479.1	0.692426	[0.26439978; 1.12045188]	0.00152057	0	0.767554	FEM
NONHSAG049108.2	-0.685066	[-1.10864316; -0.26148951]	0.00152449	0	0.99914	FEM
NONHSAG076356.1	0.690399	[0.26346875; 1.11732970]	0.00152669	0	0.861249	FEM
NONHSAG111592.1	0.689584	[0.26314694; 1.11602112]	0.00152711	0	0.89777	FEM
NONHSAG076213.1	0.694245	[0.26487801; 1.12361252]	0.00152896	0	0.640614	FEM
NONHSAG037841.2	0.690798	[0.26354708; 1.11804841]	0.00152957	0	0.834288	FEM
NONHSAG058202.2	0.720954	[0.27498744; 1.16692046]	0.00153198	0.596323	0.0153271	FEM
NONHSAG060947.1	0.70734	[0.26978804; 1.14489288]	0.00153225	0.383205	0.124104	FEM
NONHSAG025648.2	-0.700585	[-1.13406288; -0.26710807]	0.00153624	0.158129	0.305654	FEM
NONHSAG000655.2	0.69477	[0.26487883; 1.12466199]	0.00153672	0	0.590223	FEM
NONHSAG020443.2	0.717496	[0.27353671; 1.16145472]	0.00153694	0.561036	0.0256085	FEM
NONHSAG051181.2	0.687784	[0.26213857; 1.11342991]	0.00153974	0	0.945121	FEM
NONHSAG049537.2	0.689138	[0.26256890; 1.11570768]	0.00154311	0	0.886613	FEM
NONHSAG081626.1	0.709089	[0.27015105; 1.14802658]	0.00154385	0.434025	0.0890869	FEM
NONHSAG039560.2	-0.69943	[-1.13241407; -0.26644615]	0.00154482	0.119925	0.33668	FEM
NONHSAG101061.1	0.694131	[0.26441829; 1.12384366]	0.00154518	0	0.605445	FEM
NONHSAG057851.1	-0.686833	[-1.11213198; -0.26153461]	0.00154929	0	0.960745	FEM
NONHSAG047805.3	-0.688372	[-1.11486214; -0.26188219]	0.00155874	0	0.890739	FEM
NONHSAG091912.1	0.694691	[0.26408596; 1.12529703]	0.00156664	0	0.520963	FEM
NONHSAG076065.1	-0.688073	[-1.11475956; -0.26138583]	0.00157399	0	0.874263	FEM
NONHSAG065014.2	0.696914	[0.26463922; 1.12918797]	0.00157815	0.0607563	0.383302	FEM
NONHSAG024171.3	-0.696001	[-1.12774052; -0.26426208]	0.00157937	0.00648193	0.42414	FEM
NONHSAG106034.1	0.687094	[0.26084624; 1.11334247]	0.00158073	0	0.905226	FEM
NONHSAG093208.1	0.686434	[0.26041255; 1.11245588]	0.00158811	0	0.919124	FEM
NONHSAG105543.1	0.707251	[0.26816701; 1.14633471]	0.00159372	0.441384	0.0843948	FEM
NONHSAG112525.1	0.720285	[0.27301721; 1.16755258]	0.00159726	0.6178	0.0106267	FEM
NONHSAG030109.3	0.684	[0.25898700; 1.10901259]	0.00160855	0	0.969074	FEM
NONHSAG068970.2	-0.698597	[-1.13268395; -0.26450979]	0.00160872	0.210064	0.262755	FEM
NONHSAG087654.1	0.693919	[0.26259746; 1.12524003]	0.00161442	0	0.452743	FEM
NONHSAG017567.2	0.687918	[0.26024874; 1.11558761]	0.0016176	0	0.786948	FEM
NONHSAG019695.2	0.688663	[0.26045521; 1.11687174]	0.00162068	0	0.736991	FEM
NONHSAG020981.2	0.682934	[0.25828659; 1.10758113]	0.00162075	0	0.980873	FEM
NONHSAG021159.2	0.68331	[0.25842161; 1.10819885]	0.00162105	0	0.973105	FEM
NONHSAG106683.1	0.6974	[0.26362271; 1.13117665]	0.0016262	0.190234	0.279199	FEM
NONHSAG022893.3	-0.701844	[-1.13839163; -0.26529564]	0.00162648	0.346465	0.151732	FEM
NONHSAG069173.1	0.68683	[0.25960067; 1.11405880]	0.00162729	0	0.824202	FEM
NONHSAG016965.2	0.692811	[0.26169685; 1.12392593]	0.00163401	0	0.468398	FEM
NONHSAG025266.2	-0.703068	[-1.14057610; -0.26555990]	0.00163446	0.387427	0.12104	FEM
NONHSAG102697.1	0.694152	[0.26216342; 1.12614042]	0.00163563	0.0410003	0.398399	FEM
NONHSAG029930.2	0.689122	[0.26019655; 1.11804808]	0.0016384	0	0.66703	FEM
NONHSAG018936.2	0.685512	[0.25875090; 1.11227220]	0.00164181	0	0.861013	FEM
NONHSAG105493.1	0.696794	[0.26280463; 1.13078354]	0.00165018	0.207672	0.264741	FEM
NONHSAG022976.2	-0.686944	[-1.11488674; -0.25900053]	0.00165387	0	0.756591	FEM
NONHSAG113034.1	0.711785	[0.26826461; 1.15530445]	0.00165796	0.556346	0.0272232	FEM
NONHSAG069753.1	0.683162	[0.25727979; 1.10904415]	0.00166623	0	0.920814	FEM
NONHSAG099774.2	0.683726	[0.25745123; 1.11000054]	0.00166795	0	0.894568	FEM
NONHSAG099658.1	0.686772	[0.25853176; 1.11501242]	0.00167074	0	0.727593	FEM
NONHSAG021736.2	0.697405	[0.26252604; 1.13228408]	0.00167109	0.26478	0.217384	FEM
NONHSAG022419.2	0.689909	[0.25968241; 1.12013648]	0.00167201	0	0.541024	FEM
NONHSAG052532.2	0.694728	[0.26148705; 1.12796898]	0.00167238	0.155707	0.307638	FEM
NONHSAG111879.1	0.683806	[0.25737221; 1.11024038]	0.00167255	0	0.882684	FEM
NONHSAG010072.2	-0.688539	[-1.11794388; -0.25913481]	0.00167334	0	0.61678	FEM
NONHSAG098771.1	0.706245	[0.26576788; 1.14672226]	0.00167459	0.486415	0.0581739	FEM
NONHSAG010755.2	0.682567	[0.25655629; 1.10857750]	0.00168734	0	0.910807	FEM
NONHSAG069203.1	0.693862	[0.26069137; 1.12703218]	0.00169196	0.152658	0.310132	FEM
NONHSAG048695.2	-0.698206	[-1.13415090; -0.26226157]	0.00169454	0.323001	0.170124	FEM
NONHSAG076511.1	0.697428	[0.26193173; 1.13292357]	0.0016961	0.300559	0.188121	FEM
NONHSAG053208.2	0.705301	[0.26479927; 1.14580372]	0.0016998	0.488151	0.0572554	FEM
NONHSAG111276.1	-0.679147	[-1.10373915; -0.25455423]	0.00171813	0	0.978305	FEM
NONHSAG041931.2	0.678827	[0.25434094; 1.10331330]	0.00172217	0	0.981522	FEM
NONHSAG102765.1	0.684861	[0.25656303; 1.11315946]	0.00172384	0	0.71473	FEM
NONHSAG020343.2	0.689645	[0.25835177; 1.12093915]	0.00172399	0	0.443052	FEM
NONHSAG050012.2	0.702454	[0.26305117; 1.14185645]	0.00172814	0.457929	0.0742458	FEM
NONHSAG113063.1	0.687868	[0.25758327; 1.11815186]	0.00172838	0	0.52866	FEM
NONHSAG082513.1	0.682215	[0.25536825; 1.10906227]	0.00173264	0	0.843853	FEM
NONHSAG084232.1	0.684738	[0.25615774; 1.11331872]	0.00173934	0	0.686421	FEM
NONHSAG072854.1	0.707768	[0.26465506; 1.15088083]	0.00174428	0.550822	0.0292007	FEM
NONHSAG026627.2	0.690779	[0.25830208; 1.12325536]	0.00174429	0.101535	0.351378	FEM
NONHSAG045401.2	0.684127	[0.25580436; 1.11244955]	0.00174474	0	0.710223	FEM
NONHSAG082748.1	0.708828	[0.26494224; 1.15271328]	0.00174886	0.566082	0.0239367	FEM
NONHSAG033915.2	0.682143	[0.25480485; 1.10948076]	0.00175599	0	0.799351	FEM
NONHSAG082199.1	-0.684507	[-1.11333032; -0.25568319]	0.00175619	0	0.66038	FEM
NONHSAG026235.3	0.687074	[0.25661884; 1.11752838]	0.0017572	0	0.509283	FEM
NONHSAG085549.1	-0.68718	[-1.11796070; -0.25639854]	0.00176852	0	0.480265	FEM
NONHSAG042655.2	-0.692863	[-1.12726454; -0.25846216]	0.00177099	0.245002	0.233744	FEM
NONHSAG032445.2	0.691826	[0.25802355; 1.12562937]	0.00177324	0.206601	0.26563	FEM
NONHSAG050973.2	-0.679818	[-1.10633904; -0.25329773]	0.0017842	0	0.864882	FEM
NONHSAG053582.2	0.69055	[0.25727452; 1.12382550]	0.00178515	0.170339	0.295625	FEM
NONHSAG084253.1	0.691744	[0.25766859; 1.12581930]	0.00178737	0.225908	0.249594	FEM
NONHSAG087630.1	0.683842	[0.25462791; 1.11305518]	0.00179166	0	0.619677	FEM
NONHSAG059495.1	0.687938	[0.25607966; 1.11979717]	0.00179491	0.051051	0.39075	FEM
NONHSAG066914.1	0.691664	[0.25731925; 1.12600973]	0.00180138	0.244038	0.234543	FEM
NONHSAG001180.3	0.692537	[0.25735049; 1.12772367]	0.0018143	0.293033	0.194227	FEM
NONHSAG093068.1	0.679759	[0.25249575; 1.10702207]	0.00181908	0	0.798665	FEM
NONHSAG024172.2	-0.67971	[-1.10697561; -0.25244484]	0.00182056	0	0.797571	FEM
NONHSAG024319.2	0.689965	[0.25617511; 1.12375440]	0.00182404	0.21033	0.262534	FEM
NONHSAG042763.2	0.67604	[0.25088597; 1.10119439]	0.00182945	0	0.949623	FEM
NONHSAG101846.1	0.690055	[0.25600845; 1.12410068]	0.00183295	0.227977	0.247876	FEM
NONHSAG030020.2	0.680456	[0.25206016; 1.10885145]	0.00185053	0	0.690074	FEM
NONHSAG078805.1	0.685693	[0.25373518; 1.11765069]	0.00186254	0.069208	0.376767	FEM
NONHSAG096192.1	0.677792	[0.25079750; 1.10478556]	0.00186317	0	0.817297	FEM
NONHSAG019908.2	0.683252	[0.25271495; 1.11378939]	0.00186788	0	0.49025	FEM
NONHSAG110738.1	0.692131	[0.25567879; 1.12858411]	0.00188237	0.358467	0.142533	FEM
NONHSAG055098.2	0.681602	[0.25178238; 1.11142190]	0.00188269	0	0.551879	FEM
NONHSAG044227.2	0.673697	[0.24880230; 1.09859214]	0.00188548	0	0.958853	FEM
NONHSAG058410.2	-0.686052	[-1.11876710; -0.25333764]	0.00188675	0.137675	0.32234	FEM
NONHSAG040953.2	0.682392	[0.25192599; 1.11285734]	0.00188951	0	0.493708	FEM
NONHSAG109654.1	0.684072	[0.25252182; 1.11562254]	0.00189064	0.0319712	0.405212	FEM
NONHSAG028225.2	0.67682	[0.24982780; 1.10381197]	0.00189142	0	0.814495	FEM
NONHSAG028198.2	-0.675057	[-1.10096893; -0.24914590]	0.00189289	0	0.899751	FEM
NONHSAG032893.3	0.691475	[0.25512324; 1.12782660]	0.00189662	0.354746	0.145368	FEM
NONHSAG043302.2	-0.690163	[-1.12577363; -0.25455140]	0.00190063	0.320587	0.172042	FEM
NONHSAG006549.2	0.6749	[0.24891701; 1.10088267]	0.00190087	0	0.89414	FEM
NONHSAG114514.1	0.695192	[0.25631822; 1.13406589]	0.00190465	0.449102	0.0795897	FEM
NONHSAG005507.2	0.680694	[0.25082777; 1.11055965]	0.0019114	0	0.544628	FEM
NONHSAG005923.2	0.674541	[0.24853081; 1.10055055]	0.00191279	0	0.890679	FEM
NONHSAG071892.1	0.691061	[0.25451912; 1.12760373]	0.00191733	0.364241	0.138163	FEM
NONHSAG003526.3	0.675381	[0.24862179; 1.10214002]	0.0019231	0	0.831355	FEM
NONHSAG014914.3	0.691426	[0.25446219; 1.12838969]	0.00192615	0.38214	0.124881	FEM
NONHSAG070317.1	0.679587	[0.25008774; 1.10908712]	0.00192697	0	0.57659	FEM
NONHSAG021095.2	0.672433	[0.24739818; 1.09746765]	0.00192967	0	0.949472	FEM
NONHSAG078736.1	0.679739	[0.25007442; 1.10940374]	0.00193022	0	0.561212	FEM
NONHSAG074968.1	0.6916	[0.25441686; 1.12878384]	0.00193121	0.391053	0.118428	FEM
NONHSAG009949.2	0.676165	[0.24870768; 1.10362245]	0.00193268	0	0.768274	FEM
NONHSAG048688.3	-0.704967	[-1.15070683; -0.25922664]	0.00193608	0.60259	0.0138382	FEM
NONHSAG056966.1	-0.688189	[-1.12338948; -0.25298922]	0.00193925	0.302493	0.186557	FEM
NONHSAG076828.1	0.686408	[0.25231954; 1.12049720]	0.00193995	0.239779	0.238076	FEM
NONHSAG073655.1	0.68934	[0.25332514; 1.12535473]	0.00194331	0.342326	0.15494	FEM
NONHSAG051398.2	-0.701843	[-1.14580384; -0.25788242]	0.00194503	0.572793	0.0218186	FEM
NONHSAG060377.1	1.27291	[0.46757174; 2.07824235]	0.00194857	0.646819	0.00597223	REM
NONHSAG102215.1	0.670157	[0.24612589; 1.09418892]	0.0019505	0	0.985933	FEM
NONHSAG070506.1	0.689059	[0.25297770; 1.12513996]	0.00195472	0.346613	0.151618	FEM
NONHSAG085032.1	0.680605	[0.24986207; 1.11134696]	0.00195527	0	0.463445	FEM
NONHSAG083596.1	0.669287	[0.24565821; 1.09291543]	0.00195763	0	0.993659	FEM
NONHSAG072030.1	0.692011	[0.25398769; 1.13003354]	0.00195816	0.423255	0.0961404	FEM
NONHSAG024469.2	0.680932	[0.24991988; 1.11194466]	0.00195824	0	0.44106	FEM
NONHSAG061450.1	0.683953	[0.25102623; 1.11687887]	0.00195834	0.160978	0.303319	FEM
NONHSAG093154.1	-0.673817	[-1.10033500; -0.24729864]	0.0019587	0	0.84762	FEM
NONHSAG027281.3	0.685444	[0.25135102; 1.11953675]	0.00196885	0.242131	0.236124	FEM
NONHSAG078435.1	0.67389	[0.24701140; 1.10076783]	0.0019738	0	0.815372	FEM
NONHSAG113893.1	-0.684182	[-1.11768676; -0.25067696]	0.00197889	0.204763	0.267155	FEM
NONHSAG003303.2	-0.668608	[-1.09227813; -0.24493823]	0.00198048	0	0.992578	FEM
NONHSAG024039.2	0.674484	[0.24694014; 1.10202688]	0.00198776	0	0.754416	FEM
NONHSAG039357.2	0.676472	[0.24750567; 1.10543852]	0.00199562	0	0.618971	FEM
NONHSAG064541.1	0.701653	[0.25665498; 1.14665061]	0.0019986	0.592025	0.0164058	FEM
NONHSAG004072.3	0.682298	[0.24946967; 1.11512724]	0.00200368	0.158026	0.305739	FEM
NONHSAG048463.2	0.672454	[0.24587007; 1.09903809]	0.00200369	0	0.837865	FEM
NONHSAG018419.2	0.67269	[0.24593689; 1.09944353]	0.00200465	0	0.823474	FEM
NONHSAG027469.2	-0.682631	[-1.11576566; -0.24949604]	0.00200827	0.181746	0.286219	FEM
NONHSAG080298.1	-0.67242	[-1.09908307; -0.24575729]	0.0020086	0	0.830317	FEM
NONHSAG112738.1	0.69296	[0.25317642; 1.13274331]	0.00201277	0.480279	0.0614777	FEM
NONHSAG020066.2	-0.666648	[-1.08989720; -0.24339787]	0.00202095	0	0.997209	FEM
NONHSAG045767.2	-0.671268	[-1.09750382; -0.24503150]	0.00202357	0	0.864148	FEM
NONHSAG047724.2	0.67121	[0.24499283; 1.09742667]	0.00202444	0	0.865792	FEM
NONHSAG031680.2	0.683306	[0.24940789; 1.11720369]	0.00202444	0.234103	0.242788	FEM
NONHSAG078853.1	0.687293	[0.25074810; 1.12383732]	0.00202999	0.37044	0.133517	FEM
NONHSAG096735.1	0.689166	[0.25124637; 1.12708633]	0.00203892	0.423272	0.0961287	FEM
NONHSAG027782.2	-0.675464	[-1.10472879; -0.24620008]	0.00204143	0	0.585991	FEM
NONHSAG014161.3	0.67362	[0.24543287; 1.10180642]	0.00204612	0	0.687597	FEM
NONHSAG010607.2	0.676795	[0.24657058; 1.10701968]	0.00204707	0	0.498538	FEM
NONHSAG009013.2	0.678698	[0.24718329; 1.11021219]	0.00205103	0.0480603	0.393033	FEM
NONHSAG077469.1	0.695582	[0.25327225; 1.13789179]	0.00205393	0.543	0.0321408	FEM
NONHSAG036783.2	-0.690669	[-1.13009245; -0.25124512]	0.00206549	0.471976	0.0660896	FEM
NONHSAG043718.2	0.673593	[0.24502922; 1.10215690]	0.0020657	0	0.649335	FEM
NONHSAG020573.3	-0.678114	[-1.10959055; -0.24663773]	0.00206749	0.0487161	0.392533	FEM
NONHSAG091797.1	-0.680858	[-1.11427590; -0.24743944]	0.00207719	0.207057	0.265251	FEM
NONHSAG096957.1	0.672384	[0.24423761; 1.10052979]	0.00208332	0	0.687385	FEM
NONHSAG061134.1	0.679512	[0.24676403; 1.11226024]	0.00208645	0.159112	0.304849	FEM
NONHSAG115072.1	0.696418	[0.25274044; 1.14009632]	0.00209439	0.571203	0.0223097	FEM
NONHSAG039857.2	0.666933	[0.24201616; 1.09184985]	0.00209559	0	0.945807	FEM
NONHSAG030178.2	0.673196	[0.24426736; 1.10212553]	0.00209668	0	0.610158	FEM
NONHSAG094613.1	0.682292	[0.24751259; 1.11707145]	0.00209942	0.290613	0.196197	FEM
NONHSAG103873.1	0.675846	[0.24509589; 1.10659708]	0.00210337	0	0.448568	FEM
NONHSAG105332.1	0.665336	[0.24111961; 1.08955216]	0.0021118	0	0.97536	FEM
NONHSAG083622.1	0.669896	[0.24266822; 1.09712314]	0.0021171	0	0.770078	FEM
NONHSAG030572.2	0.66244	[0.23995538; 1.08492552]	0.00211773	0	0.999916	FEM
NONHSAG092408.1	-0.667118	[-1.09264197; -0.24159318]	0.00212062	0	0.908035	FEM
NONHSAG045698.2	0.671082	[0.24294422; 1.09922008]	0.00212495	0	0.683142	FEM
NONHSAG046071.2	0.671082	[0.24294422; 1.09922008]	0.00212495	0	0.683142	FEM
NONHSAG046225.2	0.671082	[0.24294422; 1.09922008]	0.00212495	0	0.683142	FEM
NONHSAG046406.2	0.671082	[0.24294422; 1.09922008]	0.00212495	0	0.683142	FEM
NONHSAG045812.2	0.685013	[0.24792633; 1.12209950]	0.002128	0.396703	0.114397	FEM
NONHSAG104196.1	0.67758	[0.24521523; 1.10994388]	0.00212905	0.132562	0.326485	FEM
NONHSAG000921.2	-0.676752	[-1.10868727; -0.24481640]	0.0021341	0.0967275	0.355191	FEM
NONHSAG053802.3	0.669304	[0.24207364; 1.09653501]	0.00213659	0	0.767549	FEM
NONHSAG046715.2	0.664823	[0.24044952; 1.08919725]	0.00213677	0	0.968278	FEM
NONHSAG048519.2	0.685724	[0.24779055; 1.12365690]	0.00214774	0.428298	0.0928108	FEM
NONHSAG100188.1	0.662471	[0.23933710; 1.08560491]	0.0021504	0	0.997	FEM
NONHSAG115037.1	0.676446	[0.24433662; 1.10855564]	0.00215292	0.113773	0.341615	FEM
NONHSAG102771.1	-0.671716	[-1.10107138; -0.24236050]	0.00216674	0	0.564069	FEM
NONHSAG112896.1	-0.672179	[-1.10185015; -0.24250860]	0.00216773	0	0.535652	FEM
NONHSAG013826.2	0.686785	[0.24775372; 1.12581638]	0.00216896	0.46412	0.0705969	FEM
NONHSAG093231.1	0.664194	[0.23951440; 1.08887373]	0.00217367	0	0.953568	FEM
NONHSAG038846.2	0.663736	[0.23924174; 1.08822968]	0.00217931	0	0.961842	FEM
NONHSAG021545.2	0.667802	[0.24069207; 1.09491155]	0.00218011	0	0.774504	FEM
NONHSAG020632.2	0.667344	[0.24041305; 1.09427424]	0.00218607	0	0.790195	FEM
NONHSAG112262.1	0.668324	[0.24072678; 1.09592212]	0.00218815	0	0.728607	FEM
NONHSAG113159.1	0.674093	[0.24265229; 1.10553359]	0.00219607	0.0570512	0.386153	FEM
NONHSAG046737.3	0.664024	[0.23885536; 1.08919345]	0.0022052	0	0.925177	FEM
NONHSAG069754.1	0.672275	[0.24172936; 1.10281980]	0.00221011	0	0.455373	FEM
NONHSAG064603.1	0.668472	[0.24029513; 1.09664912]	0.00221365	0	0.670919	FEM
NONHSAG002470.2	0.685339	[0.24632315; 1.12435560]	0.00221547	0.465226	0.0699542	FEM
NONHSAG042824.3	0.679368	[0.24411732; 1.11461781]	0.00221856	0.321699	0.171158	FEM
NONHSAG036955.2	0.673122	[0.24187060; 1.10437345]	0.00221869	0.0408306	0.398527	FEM
NONHSAG008920.2	0.675903	[0.24283475; 1.10897114]	0.00222053	0.193746	0.27629	FEM
NONHSAG058129.1	0.673	[0.24171315; 1.10428658]	0.00222466	0.0447274	0.39557	FEM
NONHSAG078097.1	-0.66732	[-1.09516291; -0.23947785]	0.00223506	0	0.700716	FEM
NONHSAG081592.1	0.67422	[0.24193551; 1.10650409]	0.00223603	0.135793	0.323867	FEM
NONHSAG033897.2	-0.676292	[-1.11023599; -0.24234731]	0.00225352	0.253067	0.227063	FEM
NONHSAG092291.1	-0.667771	[-1.09629369; -0.23924891]	0.00225594	0	0.633549	FEM
NONHSAG091387.1	0.674404	[0.24158612; 1.10722187]	0.00225802	0.178984	0.288499	FEM
NONHSAG008077.2	0.681166	[0.24394564; 1.11838601]	0.00226131	0.407557	0.106792	FEM
NONHSAG022037.2	0.664795	[0.23801522; 1.09157467]	0.00226496	0	0.796538	FEM
NONHSAG006445.2	0.662263	[0.23702223; 1.08750278]	0.00226964	0	0.916524	FEM
NONHSAG105224.1	0.668086	[0.23906078; 1.09711146]	0.0022721	0	0.584698	FEM
NONHSAG100309.1	0.670874	[0.23998779; 1.10176077]	0.00227589	0.00917995	0.422159	FEM
NONHSAG019112.2	0.673657	[0.24086592; 1.10644730]	0.00228217	0.178817	0.288637	FEM
NONHSAG032297.3	-0.663468	[-1.08988396; -0.23705185]	0.00229149	0	0.825666	FEM
NONHSAG025094.3	0.66656	[0.23798290; 1.09513709]	0.00230094	0	0.624132	FEM
NONHSAG029841.2	0.665577	[0.23745404; 1.09369920]	0.00231065	0	0.666562	FEM
NONHSAG098652.1	0.690816	[0.24625844; 1.13537257]	0.0023212	0.591178	0.016624	FEM
NONHSAG078045.1	0.678016	[0.24161703; 1.11441418]	0.00232544	0.378214	0.127759	FEM
NONHSAG035842.2	0.667891	[0.23779759; 1.09798469]	0.00233704	0	0.48265	FEM
NONHSAG049306.2	0.668244	[0.23767012; 1.09881823]	0.00235098	0	0.441319	FEM
NONHSAG022492.2	0.674827	[0.23999367; 1.10966071]	0.00235196	0.307942	0.182163	FEM
NONHSAG002631.2	0.657695	[0.23388843; 1.08150247]	0.00235266	0	0.980557	FEM
NONHSAG026534.2	0.673642	[0.23942858; 1.10785510]	0.00235982	0.276737	0.207545	FEM
NONHSAG111825.1	0.664916	[0.23630469; 1.09352736]	0.00236108	0	0.615187	FEM
NONHSAG087159.1	0.656532	[0.23327567; 1.07978917]	0.00236387	0	0.992764	FEM
NONHSAG076014.2	0.660215	[0.23458132; 1.08584854]	0.00236403	0	0.882831	FEM
NONHSAG094053.1	0.670729	[0.23820188; 1.10325695]	0.0023704	0.165765	0.299388	FEM
NONHSAG050396.2	-0.659233	[-1.08434896; -0.23411798]	0.00237047	0	0.918144	FEM
NONHSAG009293.2	0.660093	[0.23441733; 1.08576800]	0.00237079	0	0.878979	FEM
NONHSAG009700.3	-0.678531	[-1.11611298; -0.24094813]	0.00237172	0.424581	0.0952603	FEM
NONHSAG106157.1	0.659272	[0.23400647; 1.08453682]	0.00237751	0	0.907974	FEM
NONHSAG008530.2	0.662533	[0.23513073; 1.08993462]	0.00237938	0	0.728542	FEM
NONHSAG042934.2	0.656984	[0.23312502; 1.08084271]	0.00238144	0	0.978165	FEM
NONHSAG108032.1	0.666812	[0.23652428; 1.09709909]	0.00238636	0	0.461998	FEM
NONHSAG099496.1	0.662822	[0.23506601; 1.09057710]	0.00238878	0	0.69335	FEM
NONHSAG073574.2	0.663704	[0.23534595; 1.09206256]	0.00239064	0	0.636165	FEM
NONHSAG043635.2	0.661789	[0.23463921; 1.08893784]	0.00239218	0	0.750714	FEM
NONHSAG049275.3	0.667999	[0.23682325; 1.09917393]	0.00239318	0.0510755	0.390732	FEM
NONHSAG024359.2	0.668934	[0.23705113; 1.10081645]	0.00239897	0.117531	0.338602	FEM
NONHSAG004615.2	0.660095	[0.23385793; 1.08633250]	0.00240243	0	0.831942	FEM
NONHSAG073644.1	0.65878	[0.23319824; 1.08436276]	0.00241347	0	0.88307	FEM
NONHSAG109412.1	-0.658868	[-1.08456247; -0.23317371]	0.00241664	0	0.874365	FEM
NONHSAG108754.1	0.670338	[0.23713108; 1.10354485]	0.00242236	0.217489	0.256589	FEM
NONHSAG056256.1	0.687525	[0.24312949; 1.13192030]	0.00242682	0.590443	0.0168147	FEM
NONHSAG073703.1	0.658889	[0.23291327; 1.08486562]	0.00243197	0	0.851133	FEM
NONHSAG060442.1	-0.668123	[-1.10021180; -0.23603474]	0.00244005	0.137006	0.322883	FEM
NONHSAG057305.1	0.6653	[0.23502828; 1.09557189]	0.00244056	0	0.458673	FEM
NONHSAG085048.2	0.66594	[0.23520943; 1.09667020]	0.00244311	0.0102184	0.421394	FEM
NONHSAG051640.2	0.673226	[0.23758932; 1.10886303]	0.00245403	0.351731	0.147677	FEM
NONHSAG064559.1	0.668992	[0.23606562; 1.10191891]	0.00245571	0.200808	0.270437	FEM
NONHSAG081655.1	-0.655749	[-1.08015184; -0.23134664]	0.00245838	0	0.953527	FEM
NONHSAG109532.1	0.658808	[0.23218988; 1.08542529]	0.00247203	0	0.792896	FEM
NONHSAG020040.3	0.677416	[0.23871285; 1.11611935]	0.00247402	0.464247	0.0705232	FEM
NONHSAG093343.1	0.663656	[0.23381152; 1.09349968]	0.00247704	0	0.492094	FEM
NONHSAG070381.1	0.663161	[0.23362683; 1.09269489]	0.00247764	0	0.519596	FEM
NONHSAG105983.1	0.657817	[0.23160428; 1.08403069]	0.0024858	0	0.827242	FEM
NONHSAG002696.3	0.661097	[0.23257402; 1.08961985]	0.00249655	0	0.610709	FEM
NONHSAG003031.2	0.659389	[0.23193261; 1.08684566]	0.00249892	0	0.712707	FEM
NONHSAG114546.1	0.668546	[0.23513435; 1.10195857]	0.00250003	0.235882	0.241311	FEM
NONHSAG000386.2	0.667601	[0.23476966; 1.10043168]	0.00250188	0.197225	0.273408	FEM
NONHSAG043706.2	0.669166	[0.23519522; 1.10313694]	0.00250909	0.269788	0.213257	FEM
NONHSAG072310.1	0.658209	[0.23134200; 1.08507681]	0.00250922	0	0.766809	FEM
NONHSAG023003.3	0.662659	[0.23283141; 1.09248628]	0.00251356	0	0.490807	FEM
NONHSAG026310.2	-0.681298	[-1.12329084; -0.23930420]	0.00251788	0.547344	0.0304878	FEM
NONHSAG056864.1	0.658636	[0.23132333; 1.08594895]	0.00251912	0	0.724533	FEM
NONHSAG005643.2	-0.653046	[-1.07687158; -0.22921952]	0.00252746	0	0.974758	FEM
NONHSAG064101.1	-0.655346	[-1.08069565; -0.22999716]	0.00252923	0	0.892339	FEM
NONHSAG037378.3	-0.66661	[-1.09933110; -0.23388886]	0.00253281	0.19318	0.27676	FEM
NONHSAG000620.2	0.652448	[0.22891383; 1.07598295]	0.00253318	0	0.983527	FEM
NONHSAG071928.1	0.664277	[0.23304482; 1.09550849]	0.00253429	0.0697998	0.376308	FEM
NONHSAG000838.3	0.659591	[0.23134413; 1.08783828]	0.00253765	0	0.633401	FEM
NONHSAG010196.2	0.660931	[0.23179214; 1.09006957]	0.00253894	0	0.550029	FEM
NONHSAG072341.1	-0.667294	[-1.10058128; -0.23400594]	0.00253997	0.230168	0.246055	FEM
NONHSAG110863.1	-0.656696	[-1.08310600; -0.23028625]	0.00254017	0	0.805145	FEM
NONHSAG010625.2	0.683249	[0.23953470; 1.12696342]	0.00254377	0.580832	0.0194383	FEM
NONHSAG093518.1	0.661988	[0.23206368; 1.09191257]	0.00254479	0	0.479796	FEM
NONHSAG030088.2	-0.654307	[-1.07926243; -0.22935064]	0.00254599	0	0.917802	FEM
NONHSAG102770.1	-0.654564	[-1.07984617; -0.22928228]	0.00255547	0	0.895541	FEM
NONHSAG108410.1	0.666556	[0.23347109; 1.09964181]	0.00255617	0.218098	0.256082	FEM
NONHSAG111194.1	0.650146	[0.22770433; 1.07258762]	0.00255729	0	0.999023	FEM
NONHSAG103554.1	0.686059	[0.24028143; 1.13183751]	0.00255736	0.614387	0.0112987	FEM
NONHSAG071177.1	0.659847	[0.23096343; 1.08873088]	0.00256553	0	0.570966	FEM
NONHSAG043391.3	0.656653	[0.22982790; 1.08347837]	0.00256658	0	0.765836	FEM
NONHSAG109594.1	0.6572	[0.22997911; 1.08442104]	0.00256898	0	0.728949	FEM
NONHSAG041985.2	0.654302	[0.22878385; 1.07982047]	0.00257988	0	0.875539	FEM
NONHSAG076221.1	0.658411	[0.23019070; 1.08663178]	0.00258167	0	0.632232	FEM
NONHSAG005145.2	-0.666419	[-1.10012578; -0.23271205]	0.00259817	0.259308	0.221901	FEM
NONHSAG007378.2	-0.660379	[-1.09017297; -0.23058497]	0.00259924	0	0.486851	FEM
NONHSAG001272.2	-0.680879	[-1.12402102; -0.23773613]	0.00259963	0.571554	0.0222005	FEM
NONHSAG031061.2	0.66529	[0.23226182; 1.09831838]	0.0026015	0.217104	0.256908	FEM
NONHSAG015127.2	0.665462	[0.23231662; 1.09860711]	0.00260181	0.225161	0.250215	FEM
NONHSAG007203.2	0.654081	[0.22834343; 1.07981921]	0.00260182	0	0.856665	FEM
NONHSAG103940.1	0.6672	[0.23273837; 1.10166237]	0.00261283	0.302489	0.18656	FEM
NONHSAG096767.1	-0.64983	[-1.07308126; -0.22657825]	0.002619	0	0.988544	FEM
NONHSAG058178.1	-0.655324	[-1.08215838; -0.22848947]	0.00261927	0	0.760858	FEM
NONHSAG069793.1	0.667291	[0.23259260; 1.10198970]	0.00262342	0.314725	0.17672	FEM
NONHSAG109653.1	0.668491	[0.23285956; 1.10412162]	0.00263245	0.358672	0.142377	FEM
NONHSAG104771.1	0.65401	[0.22774225; 1.08027764]	0.00263692	0	0.810727	FEM
NONHSAG102413.2	0.64912	[0.22586240; 1.07237777]	0.00264786	0	0.987841	FEM
NONHSAG111252.1	0.660038	[0.22929628; 1.09077912]	0.00267012	0.0335747	0.404006	FEM
NONHSAG096159.1	0.653345	[0.22688931; 1.07980086]	0.00267519	0	0.790995	FEM
NONHSAG019428.2	0.668595	[0.23199818; 1.10519149]	0.00268651	0.400108	0.111991	FEM
NONHSAG011571.2	0.663069	[0.23002523; 1.09611282]	0.00268991	0.223559	0.251545	FEM
NONHSAG009599.2	0.660937	[0.22925885; 1.09261419]	0.00269154	0.122336	0.33474	FEM
NONHSAG087660.1	0.673159	[0.23343503; 1.11288260]	0.00269537	0.498518	0.051922	FEM
NONHSAG105538.1	0.651454	[0.22589226; 1.07701530]	0.00269636	0	0.865459	FEM
NONHSAG018218.2	-0.647532	[-1.07058112; -0.22448263]	0.00269949	0	0.991124	FEM
NONHSAG047837.2	0.662841	[0.22973995; 1.09594200]	0.00270256	0.227831	0.247996	FEM
NONHSAG112450.1	0.675355	[0.23405671; 1.11665311]	0.0027038	0.536366	0.034762	FEM
NONHSAG097345.1	0.675322	[0.23402359; 1.11662041]	0.00270511	0.536347	0.0347697	FEM
NONHSAG029887.2	0.6624	[0.22954485; 1.09525567]	0.00270516	0.211935	0.261202	FEM
NONHSAG009955.2	0.65769	[0.22783871; 1.08754108]	0.00270974	0	0.473497	FEM
NONHSAG105262.1	0.662648	[0.22953054; 1.09576609]	0.00271133	0.229402	0.246691	FEM
NONHSAG038227.2	-0.655463	[-1.08395096; -0.22697468]	0.0027155	0	0.59588	FEM
NONHSAG022068.2	0.655943	[0.22709076; 1.08479476]	0.00271863	0	0.56074	FEM
NONHSAG077521.1	0.664295	[0.22979647; 1.09879355]	0.00273009	0.309491	0.180917	FEM
NONHSAG022638.2	-0.664155	[-1.09862439; -0.22968633]	0.00273391	0.308481	0.181729	FEM
NONHSAG096448.1	0.650131	[0.22476671; 1.07549560]	0.00273831	0	0.87797	FEM
NONHSAG014964.2	0.652802	[0.22558256; 1.08002091]	0.00274508	0	0.714277	FEM
NONHSAG024981.2	-0.655515	[-1.08451528; -0.22651414]	0.00274545	0	0.544629	FEM
NONHSAG018591.2	0.66597	[0.23003855; 1.10190208]	0.00275093	0.376202	0.129242	FEM
NONHSAG115075.1	-0.656265	[-1.08586121; -0.22666828]	0.00275205	0	0.491692	FEM
NONHSAG047168.3	0.657854	[0.22713321; 1.08857570]	0.00275733	0.0399631	0.399184	FEM
NONHSAG103618.1	0.651645	[0.22498275; 1.07830768]	0.00275775	0	0.765269	FEM
NONHSAG010929.2	0.667072	[0.23028994; 1.10385377]	0.00275892	0.409427	0.105502	FEM
NONHSAG093773.1	0.649371	[0.22395618; 1.07478578]	0.00277314	0	0.871871	FEM
NONHSAG031813.2	0.647215	[0.22306198; 1.07136884]	0.00278282	0	0.951923	FEM
NONHSAG019924.2	-0.663632	[-1.09859243; -0.22867090]	0.00278588	0.33454	0.161018	FEM
NONHSAG113652.1	0.647124	[0.22291600; 1.07133270]	0.00279019	0	0.948797	FEM
NONHSAG112699.1	0.650689	[0.22411637; 1.07726117]	0.00279195	0	0.771472	FEM
NONHSAG036425.3	0.658568	[0.22677242; 1.09036333]	0.0027956	0.139498	0.320858	FEM
NONHSAG110675.1	0.645334	[0.22210787; 1.06856043]	0.00280257	0	0.98545	FEM
NONHSAG060566.1	0.652086	[0.22437479; 1.07979670]	0.00280621	0	0.662578	FEM
NONHSAG087288.1	0.65903	[0.22674501; 1.09131571]	0.00280744	0.178083	0.289243	FEM
NONHSAG025700.2	-0.651269	[-1.07856813; -0.22397033]	0.00281415	0	0.700621	FEM
NONHSAG057638.1	0.668826	[0.22989393; 1.10775756]	0.00282131	0.480247	0.0614955	FEM
NONHSAG044761.2	0.656446	[0.22560473; 1.08728753]	0.00282348	0.0569164	0.386256	FEM
NONHSAG073858.1	0.650963	[0.22368745; 1.07823953]	0.00282561	0	0.70258	FEM
NONHSAG050576.2	-0.650544	[-1.07756047; -0.22352753]	0.00282663	0	0.726779	FEM
NONHSAG020004.3	0.64667	[0.22209011; 1.07124938]	0.00283355	0	0.926257	FEM
NONHSAG109496.1	0.654569	[0.22470477; 1.08443407]	0.00283988	0	0.462873	FEM
NONHSAG038747.2	0.652441	[0.22394152; 1.08094032]	0.00284199	0	0.584701	FEM
NONHSAG099892.1	0.653828	[0.22439434; 1.08326156]	0.00284349	0	0.49979	FEM
NONHSAG046754.2	0.66292	[0.22745991; 1.09838108]	0.00284699	0.359718	0.141582	FEM
NONHSAG030035.2	-0.660697	[-1.09474401; -0.22665077]	0.00284996	0.291369	0.195582	FEM
NONHSAG106556.1	0.673089	[0.23085426; 1.11532365]	0.00285294	0.558821	0.0263639	FEM
NONHSAG109366.1	0.663433	[0.22753815; 1.09932703]	0.00285321	0.378201	0.127768	FEM
NONHSAG075902.1	0.655227	[0.22457275; 1.08588203]	0.00286299	0.0418466	0.397757	FEM
NONHSAG105541.1	0.643331	[0.22045613; 1.06620578]	0.00286558	0	0.991954	FEM
NONHSAG093494.1	0.652162	[0.22348099; 1.08084241]	0.00286566	0	0.56612	FEM
NONHSAG108337.1	0.645199	[0.22107060; 1.06932641]	0.00286726	0	0.949957	FEM
NONHSAG055411.2	0.65882	[0.22561621; 1.09202427]	0.00287511	0.243939	0.234625	FEM
NONHSAG062851.1	0.652531	[0.22341342; 1.08164955]	0.00287832	0	0.525254	FEM
NONHSAG083366.1	-0.671115	[-1.11250667; -0.22972237]	0.00288172	0.542505	0.0323322	FEM
NONHSAG003322.2	0.662226	[0.22661143; 1.09784149]	0.00288613	0.367834	0.135464	FEM
NONHSAG072111.1	0.652777	[0.22331580; 1.08223789]	0.00289019	0	0.493783	FEM
NONHSAG112778.1	-0.650863	[-1.07910911; -0.22261727]	0.00289307	0	0.604713	FEM
NONHSAG062832.1	0.659437	[0.22552246; 1.09335069]	0.00289483	0.286057	0.199914	FEM
NONHSAG106364.1	0.648279	[0.22169720; 1.07486115]	0.00289546	0	0.762904	FEM
NONHSAG059568.1	0.646713	[0.22106511; 1.07236066]	0.00290185	0	0.844898	FEM
NONHSAG038276.2	0.645783	[0.22072483; 1.07084164]	0.00290334	0	0.890549	FEM
NONHSAG067913.1	0.643586	[0.21990111; 1.06727132]	0.00290819	0	0.968096	FEM
NONHSAG030640.2	-0.645663	[-1.07073487; -0.22059072]	0.00290951	0	0.888788	FEM
NONHSAG049111.2	-0.641655	[-1.06414675; -0.21916245]	0.00291345	0	0.996557	FEM
NONHSAG049146.2	0.649829	[0.22186820; 1.07778923]	0.00291915	0	0.629782	FEM
NONHSAG010399.2	-0.645545	[-1.07071027; -0.22038029]	0.00292085	0	0.881835	FEM
NONHSAG075306.1	0.655714	[0.22371084; 1.08771809]	0.00293012	0.164755	0.300218	FEM
NONHSAG043884.2	-0.65541	[-1.08727294; -0.22354791]	0.00293401	0.154573	0.308566	FEM
NONHSAG024199.2	0.662043	[0.22570861; 1.09837719]	0.00294064	0.398561	0.113083	FEM
NONHSAG042527.2	-0.652776	[-1.08309572; -0.22245568]	0.00294684	0.0150291	0.417844	FEM
NONHSAG032345.2	0.669723	[0.22809678; 1.11134850]	0.00295552	0.548183	0.0301744	FEM
NONHSAG079019.1	0.64713	[0.22039057; 1.07387024]	0.0029563	0	0.74271	FEM
NONHSAG109400.1	0.66007	[0.22472782; 1.09541120]	0.00296086	0.358661	0.142385	FEM
NONHSAG072814.1	-0.649093	[-1.07729312; -0.22089360]	0.00296738	0	0.603145	FEM
NONHSAG083919.1	0.642034	[0.21843364; 1.06563377]	0.00297128	0	0.969349	FEM
NONHSAG013158.2	0.653844	[0.22244399; 1.08524374]	0.00297179	0.118825	0.337563	FEM
NONHSAG005427.3	0.663293	[0.22552068; 1.10106476]	0.00298086	0.449769	0.0791807	FEM
NONHSAG115226.1	0.643045	[0.21850866; 1.06758081]	0.00298954	0	0.921564	FEM
NONHSAG111251.1	1.22663	[0.41647801; 2.03679064]	0.00300155	0.657081	0.00474346	REM
NONHSAG071705.1	0.645397	[0.21876238; 1.07203205]	0.00302668	0	0.748328	FEM
NONHSAG010455.2	0.643485	[0.21810650; 1.06886410]	0.00302722	0	0.858889	FEM
NONHSAG104286.1	0.649315	[0.22005797; 1.07857175]	0.00302888	0	0.50183	FEM
NONHSAG097516.1	0.648712	[0.21974893; 1.07767588]	0.00303603	0	0.527126	FEM
NONHSAG020065.2	-0.647125	[-1.07512821; -0.21912119]	0.00304217	0	0.616417	FEM
NONHSAG108766.1	0.640719	[0.21691845; 1.06451882]	0.0030445	0	0.959117	FEM
NONHSAG044544.2	0.652748	[0.22098833; 1.08450742]	0.00304468	0.152912	0.309925	FEM
NONHSAG099340.1	0.652775	[0.22093910; 1.08461159]	0.00304865	0.159139	0.304827	FEM
NONHSAG087706.2	0.643642	[0.21780121; 1.06948194]	0.00305186	0	0.818764	FEM
NONHSAG101646.1	0.657379	[0.22240115; 1.09235644]	0.00305514	0.345959	0.152123	FEM
NONHSAG028372.2	0.64606	[0.21828202; 1.07383830]	0.00307512	0	0.635635	FEM
NONHSAG032648.2	0.649839	[0.21949598; 1.08018210]	0.00307943	0.0275792	0.408506	FEM
NONHSAG020736.2	0.641228	[0.21653534; 1.06592123]	0.00308307	0	0.906669	FEM
NONHSAG007303.2	0.662535	[0.22372616; 1.10134291]	0.00308334	0.483171	0.0599094	FEM
NONHSAG098730.1	0.644286	[0.21745009; 1.07112133]	0.00309124	0	0.724659	FEM
NONHSAG008786.2	0.65411	[0.22065041; 1.08756966]	0.00309915	0.269842	0.213213	FEM
NONHSAG045429.2	0.67183	[0.22645135; 1.11720917]	0.00311097	0.61605	0.0109678	FEM
NONHSAG031602.2	0.641252	[0.21612170; 1.06638192]	0.00311256	0	0.873116	FEM
NONHSAG030072.2	0.639915	[0.21556156; 1.06426747]	0.00312026	0	0.926312	FEM
NONHSAG048006.2	0.655481	[0.22078281; 1.09017830]	0.0031218	0.335226	0.16048	FEM
NONHSAG017899.2	0.66958	[0.22550829; 1.11365193]	0.00312339	0.59596	0.0154164	FEM
NONHSAG075951.2	0.657666	[0.22138109; 1.09395119]	0.00313126	0.402564	0.110267	FEM
NONHSAG073565.1	0.649788	[0.21868933; 1.08088613]	0.00313403	0.103737	0.349627	FEM
NONHSAG047859.2	0.643245	[0.21645101; 1.07003809]	0.00313657	0	0.725479	FEM
NONHSAG018106.2	0.641261	[0.21578073; 1.06674153]	0.00313678	0	0.842577	FEM
NONHSAG063676.1	0.64701	[0.21763336; 1.07638749]	0.00314251	0	0.484231	FEM
NONHSAG032777.2	0.668749	[0.22482787; 1.11267060]	0.0031505	0.593865	0.0159382	FEM
NONHSAG104824.1	0.63898	[0.21477593; 1.06318420]	0.00315361	0	0.934106	FEM
NONHSAG002822.2	0.662581	[0.22262836; 1.10253348]	0.00315912	0.514345	0.0442967	FEM
NONHSAG083718.1	0.635371	[0.21348071; 1.05726153]	0.00315949	0	0.999327	FEM
NONHSAG026380.2	0.654678	[0.21996758; 1.08938908]	0.0031595	0.337376	0.158797	FEM
NONHSAG025701.2	0.642982	[0.21600466; 1.06995958]	0.00316184	0	0.706213	FEM
NONHSAG001404.2	-0.642062	[-1.06845623; -0.21566873]	0.00316376	0	0.760195	FEM
NONHSAG002202.2	-0.648091	[-1.07863215; -0.21755039]	0.00317384	0.0549063	0.387799	FEM
NONHSAG074857.1	0.663168	[0.22251703; 1.10381854]	0.00318033	0.53113	0.0369136	FEM
NONHSAG032248.2	0.64555	[0.21659178; 1.07450920]	0.00318132	0	0.518508	FEM
NONHSAG018224.3	-0.663419	[-1.10429181; -0.22254695]	0.00318408	0.536125	0.0348593	FEM
NONHSAG028424.2	0.636292	[0.21343590; 1.05914871]	0.00318488	0	0.987415	FEM
NONHSAG061832.1	0.638513	[0.21417868; 1.06284741]	0.00318504	0	0.92513	FEM
NONHSAG062875.1	0.645812	[0.21662161; 1.07500162]	0.00318541	0	0.497717	FEM
NONHSAG089375.1	-0.654155	[-1.08891729; -0.21939230]	0.00318736	0.340726	0.156184	FEM
NONHSAG012080.2	0.655557	[0.21981923; 1.09129462]	0.00319038	0.382985	0.124264	FEM
NONHSAG004404.2	0.651304	[0.21834843; 1.08426021]	0.00319354	0.24424	0.234376	FEM
NONHSAG106085.1	0.647618	[0.21706674; 1.07817019]	0.00319679	0.057565	0.385758	FEM
NONHSAG019012.2	0.637873	[0.21371216; 1.06203384]	0.00320313	0	0.934687	FEM
NONHSAG016050.2	0.640071	[0.21442350; 1.06571755]	0.00320492	0	0.82578	FEM
NONHSAG101062.1	0.635405	[0.21283406; 1.05797690]	0.00320685	0	0.992805	FEM
NONHSAG049177.2	0.641136	[0.21474163; 1.06753098]	0.00320771	0	0.758121	FEM
NONHSAG085490.1	0.64634	[0.21637131; 1.07630954]	0.00321578	0	0.42997	FEM
NONHSAG067346.1	0.643425	[0.21533481; 1.07151457]	0.00322011	0	0.595923	FEM
NONHSAG105758.1	0.636627	[0.21300706; 1.06024794]	0.00322394	0	0.961386	FEM
NONHSAG044103.2	0.63874	[0.21371261; 1.06376771]	0.00322404	0	0.875125	FEM
NONHSAG097526.1	0.646067	[0.21616133; 1.07597332]	0.00322424	0	0.434063	FEM
NONHSAG059795.2	-0.642262	[-1.06989606; -0.21462768]	0.00324298	0	0.63741	FEM
NONHSAG109507.1	0.641061	[0.21421268; 1.06790987]	0.00324398	0	0.712963	FEM
NONHSAG011675.2	0.650738	[0.21725444; 1.08422169]	0.00325765	0.278	0.206509	FEM
NONHSAG103507.1	0.636444	[0.21244017; 1.06044830]	0.00326073	0	0.941147	FEM
NONHSAG113488.1	-0.642436	[-1.07043928; -0.21443257]	0.00326128	0	0.600322	FEM
NONHSAG108561.1	0.642268	[0.21434742; 1.07018865]	0.00326339	0	0.608777	FEM
NONHSAG002395.2	0.641915	[0.21405960; 1.06977034]	0.00327573	0	0.614258	FEM
NONHSAG114139.1	0.655737	[0.21866132; 1.09281325]	0.00327627	0.434747	0.0886218	FEM
NONHSAG083860.1	0.650802	[0.21700919; 1.08459405]	0.00327672	0.295775	0.191999	FEM
NONHSAG041002.3	0.635432	[0.21187605; 1.05898727]	0.00327731	0	0.96246	FEM
NONHSAG081713.1	0.640484	[0.21348432; 1.06748328]	0.00328287	0	0.695842	FEM
NONHSAG055201.2	0.647562	[0.21583817; 1.07928538]	0.00328326	0.164187	0.300684	FEM
NONHSAG011569.2	0.641228	[0.21362688; 1.06882866]	0.00329056	0	0.636568	FEM
NONHSAG019783.2	0.6344	[0.21135106; 1.05744834]	0.00329064	0	0.980645	FEM
NONHSAG082836.2	-0.655683	[-1.09309672; -0.21826961]	0.00330293	0.446643	0.0811078	FEM
NONHSAG114031.1	0.65523	[0.21811443; 1.09234530]	0.00330324	0.436711	0.0873625	FEM
NONHSAG038409.2	0.64395	[0.21432029; 1.07357918]	0.0033061	0	0.452628	FEM
NONHSAG053604.2	0.638275	[0.21235938; 1.06419097]	0.00331142	0	0.795356	FEM
NONHSAG076159.1	-0.635249	[-1.05916640; -0.21133147]	0.00331297	0	0.943555	FEM
NONHSAG112348.1	0.632477	[0.21040356; 1.05455013]	0.0033134	0	0.997762	FEM
NONHSAG038327.2	0.639551	[0.21259823; 1.06650311]	0.00332507	0	0.697677	FEM
NONHSAG001140.2	0.642508	[0.21356960; 1.07144714]	0.00332594	0	0.510685	FEM
NONHSAG018224.2	-0.656984	[-1.09566455; -0.21830386]	0.0033315	0.484856	0.0590047	FEM
NONHSAG061204.1	0.635949	[0.21113097; 1.06076739]	0.00334513	0	0.884699	FEM
NONHSAG073026.1	0.641341	[0.21288499; 1.06979635]	0.00334778	0	0.552557	FEM
NONHSAG022820.2	0.645487	[0.21420200; 1.07677202]	0.00335214	0.133217	0.325954	FEM
NONHSAG018456.2	0.637342	[0.21148366; 1.06320007]	0.00335328	0	0.798178	FEM
NONHSAG033960.2	0.645226	[0.21401000; 1.07644179]	0.00335988	0.128092	0.330099	FEM
NONHSAG114905.1	-0.645005	[-1.07611242; -0.21389770]	0.00336276	0.120472	0.33624	FEM
NONHSAG074987.1	0.637826	[0.21148314; 1.06416978]	0.00336529	0	0.752893	FEM
NONHSAG017910.3	0.662601	[0.21961134; 1.10559148]	0.0033715	0.580945	0.019406	FEM
NONHSAG026758.2	0.642526	[0.21288796; 1.07216434]	0.00337666	0	0.44785	FEM
NONHSAG083602.1	0.641543	[0.21245518; 1.07063071]	0.00338461	0	0.493771	FEM
NONHSAG085720.1	-0.655875	[-1.09456847; -0.21718089]	0.0033861	0.486334	0.0582168	FEM
NONHSAG107847.1	0.644887	[0.21353043; 1.07624267]	0.00338699	0.141414	0.319301	FEM
NONHSAG078620.1	0.646771	[0.21412574; 1.07941580]	0.0033891	0.233527	0.243266	FEM
NONHSAG105144.1	0.632515	[0.20933228; 1.05569722]	0.00339467	0	0.97403	FEM
NONHSAG074045.1	0.652958	[0.21608431; 1.08983199]	0.00339568	0.430863	0.091135	FEM
NONHSAG109893.1	0.633861	[0.20975160; 1.05796980]	0.00339664	0	0.929837	FEM
NONHSAG072208.1	0.63676	[0.21069927; 1.06282049]	0.00339752	0	0.776845	FEM
NONHSAG021479.3	-0.641553	[-1.07101155; -0.21209531]	0.00341172	0	0.460874	FEM
NONHSAG010200.2	0.64026	[0.21153761; 1.06898199]	0.00342148	0	0.524458	FEM
NONHSAG048821.2	0.630956	[0.20838302; 1.05352901]	0.00342763	0	0.99009	FEM
NONHSAG103744.1	0.639078	[0.21102961; 1.06712562]	0.00343032	0	0.586036	FEM
NONHSAG053687.2	-0.631829	[-1.05512181; -0.20853691]	0.0034379	0	0.968932	FEM
NONHSAG105323.1	0.653423	[0.21565312; 1.09119216]	0.00343869	0.46073	0.072585	FEM
NONHSAG014942.2	0.633215	[0.20892264; 1.05750804]	0.00344336	0	0.916594	FEM
NONHSAG055182.2	0.637321	[0.21001646; 1.06462589]	0.00346318	0	0.654689	FEM
NONHSAG052175.2	0.633256	[0.20867040; 1.05784203]	0.00346368	0	0.895517	FEM
NONHSAG115047.1	0.640364	[0.21095115; 1.06977590]	0.00346832	0	0.461262	FEM
NONHSAG069186.1	0.644577	[0.21222148; 1.07693288]	0.00347719	0.219357	0.255036	FEM
NONHSAG028728.2	0.654983	[0.21556323; 1.09440309]	0.00348346	0.507265	0.0476295	FEM
NONHSAG071035.1	-0.632987	[-1.05768573; -0.20828776]	0.00348624	0	0.886222	FEM
NONHSAG051497.2	0.662721	[0.21793659; 1.10750500]	0.0034962	0.611761	0.0118347	FEM
NONHSAG071404.1	-0.632836	[-1.05757552; -0.20809683]	0.00349714	0	0.88267	FEM
NONHSAG053201.2	0.642829	[0.21136927; 1.07428777]	0.00349816	0.155261	0.308003	FEM
NONHSAG036747.2	0.631614	[0.20767237; 1.05555585]	0.00349889	0	0.93564	FEM
NONHSAG105867.1	-0.636941	[-1.06452629; -0.20935636]	0.00350407	0	0.62527	FEM
NONHSAG043666.2	-0.630403	[-1.05360494; -0.20720016]	0.00350461	0	0.970634	FEM
NONHSAG002680.2	0.655711	[0.21545041; 1.09597127]	0.00350969	0.527985	0.038241	FEM
NONHSAG063673.1	0.652906	[0.21448075; 1.09133144]	0.0035133	0.481477	0.0608257	FEM
NONHSAG059064.1	0.635767	[0.20877749; 1.06275633]	0.00351893	0	0.681211	FEM
NONHSAG025709.2	-0.636201	[-1.06351130; -0.20889081]	0.00352118	0	0.650251	FEM
NONHSAG063457.1	-0.630957	[-1.05476763; -0.20714709]	0.0035229	0	0.941896	FEM
NONHSAG063485.1	0.658621	[0.21614257; 1.10109956]	0.00352936	0.573797	0.0215118	FEM
NONHSAG027290.2	0.64049	[0.21013774; 1.07084142]	0.00353355	0.0614518	0.382766	FEM
NONHSAG083726.1	0.63315	[0.20771909; 1.05858125]	0.00353437	0	0.824967	FEM
NONHSAG071670.1	0.639489	[0.20978128; 1.06919618]	0.00353571	0	0.433227	FEM
NONHSAG053842.2	-0.656411	[-1.09764676; -0.21517510]	0.00354752	0.549925	0.0295294	FEM
NONHSAG082962.2	0.640594	[0.20998024; 1.07120749]	0.00354829	0.0866286	0.36316	FEM
NONHSAG103314.1	0.651355	[0.21343129; 1.08927916]	0.00355408	0.467834	0.0684487	FEM
NONHSAG004303.3	0.628329	[0.20579838; 1.05085986]	0.00356099	0	0.98915	FEM
NONHSAG014383.2	0.632545	[0.20715975; 1.05793063]	0.00356252	0	0.827497	FEM
NONHSAG110654.1	-0.635678	[-1.06321123; -0.20814411]	0.00356575	0	0.62633	FEM
NONHSAG018661.3	0.628717	[0.20568634; 1.05174856]	0.00357984	0	0.97496	FEM
NONHSAG115191.1	0.640979	[0.20961920; 1.07233925]	0.00358593	0.152261	0.310457	FEM
NONHSAG088157.1	0.644785	[0.21069682; 1.07887366]	0.00359882	0.322588	0.170451	FEM
NONHSAG070265.1	0.641323	[0.20955219; 1.07309375]	0.00359985	0.183868	0.284465	FEM
NONHSAG111080.1	0.637658	[0.20830547; 1.06701065]	0.0036037	0	0.458834	FEM
NONHSAG109903.1	0.63837	[0.20851591; 1.06822506]	0.00360544	0.0160451	0.417093	FEM
NONHSAG095740.1	1.19403	[0.38996540; 1.99808622]	0.00360746	0.655331	0.00493889	REM
NONHSAG018987.2	0.649582	[0.21213237; 1.08703238]	0.00360895	0.454643	0.0762159	FEM
NONHSAG003921.2	-0.630014	[-1.05429324; -0.20573500]	0.00360951	0	0.910122	FEM
NONHSAG060459.1	-0.629889	[-1.05421596; -0.20556165]	0.00362001	0	0.906782	FEM
NONHSAG106283.1	-0.646311	[-1.08173161; -0.21089120]	0.00362233	0.382985	0.124265	FEM
NONHSAG016774.2	-0.626126	[-1.04827134; -0.20397970]	0.00364836	0	0.99483	FEM
NONHSAG002098.2	0.62886	[0.20486440; 1.05285544]	0.00364884	0	0.926768	FEM
NONHSAG081412.1	0.647082	[0.21079886; 1.08336556]	0.00364899	0.416575	0.100621	FEM
NONHSAG036309.2	0.645076	[0.21011748; 1.08003539]	0.00365117	0.364238	0.138165	FEM
NONHSAG055047.2	-0.635307	[-1.06377077; -0.20684309]	0.00365848	0	0.533694	FEM
NONHSAG087525.1	0.633595	[0.20628478; 1.06090503]	0.00365855	0	0.641811	FEM
NONHSAG042723.2	-0.629553	[-1.05426208; -0.20484353]	0.00366858	0	0.876546	FEM
NONHSAG054981.2	0.633816	[0.20615850; 1.06147261]	0.00367432	0	0.607962	FEM
NONHSAG048308.2	0.630733	[0.20515142; 1.05631359]	0.00367466	0	0.80357	FEM
NONHSAG018292.2	0.643226	[0.20915869; 1.07729423]	0.0036791	0.324539	0.168904	FEM
NONHSAG038659.2	-0.63484	[-1.06325391; -0.20642614]	0.00367955	0	0.536435	FEM
NONHSAG045344.2	-0.638138	[-1.06880028; -0.20747604]	0.00368133	0.0992334	0.353205	FEM
NONHSAG009819.2	0.628606	[0.20434345; 1.05286835]	0.00368402	0	0.908448	FEM
NONHSAG009636.2	-0.630315	[-1.05573374; -0.20489673]	0.00368421	0	0.817711	FEM
NONHSAG026012.2	0.629264	[0.20455340; 1.05397483]	0.00368434	0	0.876092	FEM
NONHSAG020180.2	0.629125	[0.20448912; 1.05376124]	0.00368588	0	0.881622	FEM
NONHSAG027819.2	0.631215	[0.20513737; 1.05729357]	0.00368838	0	0.757835	FEM
NONHSAG099599.2	0.637755	[0.20725050; 1.06825971]	0.00368935	0.0852361	0.364254	FEM
NONHSAG100543.1	0.631494	[0.20517738; 1.05781029]	0.00369243	0	0.735324	FEM
NONHSAG082024.1	0.657451	[0.21359113; 1.10130998]	0.00369396	0.599607	0.0145346	FEM
NONHSAG094736.2	-0.631493	[-1.05784546; -0.20514062]	0.00369537	0	0.731796	FEM
NONHSAG034058.2	0.638546	[0.20722358; 1.06986846]	0.00371194	0.155581	0.307741	FEM
NONHSAG084508.1	0.636689	[0.20662089; 1.06675700]	0.00371194	0.0443244	0.395877	FEM
NONHSAG114410.1	0.63914	[0.20717459; 1.07110448]	0.00373121	0.203719	0.268022	FEM
NONHSAG105364.1	0.648647	[0.21016834; 1.08712468]	0.00373814	0.487239	0.0577368	FEM
NONHSAG015659.2	0.640331	[0.20744473; 1.07321715]	0.00374047	0.262796	0.219021	FEM
NONHSAG066921.1	-0.63105	[-1.05788613; -0.20421299]	0.00375874	0	0.681676	FEM
NONHSAG020131.2	0.638569	[0.20662256; 1.07051445]	0.00376064	0.203649	0.26808	FEM
NONHSAG023020.2	-0.649689	[-1.08919592; -0.21018250]	0.00376368	0.51423	0.0443497	FEM
NONHSAG088411.1	0.645358	[0.20876619; 1.08194959]	0.00376488	0.429954	0.0917278	FEM
NONHSAG107790.1	0.641615	[0.20749674; 1.07573265]	0.00376957	0.3295	0.164981	FEM
NONHSAG050363.2	0.63073	[0.20385511; 1.05760553]	0.0037795	0	0.675544	FEM
NONHSAG032157.3	0.634432	[0.20485646; 1.06400828]	0.00379538	0	0.430221	FEM
NONHSAG056095.2	-0.639184	[-1.07204005; -0.20632798]	0.00380046	0.263743	0.218239	FEM
NONHSAG066191.1	-0.638853	[-1.07152100; -0.20618455]	0.00380341	0.252169	0.227806	FEM
NONHSAG082848.1	-0.631531	[-1.05924910; -0.20381210]	0.00380417	0	0.594303	FEM
NONHSAG093995.1	0.645407	[0.20826937; 1.08254472]	0.00380586	0.448914	0.0797056	FEM
NONHSAG090601.1	-0.642406	[-1.07756126; -0.20725077]	0.00380991	0.377011	0.128644	FEM
NONHSAG045164.2	0.624491	[0.20140709; 1.04757517]	0.00381522	0	0.967845	FEM
NONHSAG078339.1	0.626045	[0.20186876; 1.05022186]	0.00381851	0	0.908669	FEM
NONHSAG096264.1	-0.630228	[-1.05726391; -0.20319156]	0.00382063	0	0.658204	FEM
NONHSAG081300.1	-0.635677	[-1.06662655; -0.20472840]	0.00383865	0.132993	0.326136	FEM
NONHSAG054959.2	0.623251	[0.20065188; 1.04584961]	0.00384486	0	0.983458	FEM
NONHSAG081480.1	0.626898	[0.20182372; 1.05197309]	0.00384507	0	0.838914	FEM
NONHSAG053586.3	0.637319	[0.20517450; 1.06946325]	0.0038454	0.220645	0.253966	FEM
NONHSAG043730.2	-0.627718	[-1.05337015; -0.20206607]	0.00384686	0	0.788483	FEM
NONHSAG084881.1	0.638011	[0.20536541; 1.07065606]	0.003848	0.25305	0.227077	FEM
NONHSAG033940.2	0.627725	[0.20198961; 1.05345957]	0.00385339	0	0.780562	FEM
NONHSAG046853.3	0.635865	[0.20453861; 1.06719114]	0.00385918	0.163074	0.301598	FEM
NONHSAG026749.2	0.632048	[0.20321312; 1.06088267]	0.00386726	0	0.488833	FEM
NONHSAG020939.2	0.633958	[0.20362362; 1.06429230]	0.00388411	0.0804819	0.367982	FEM
NONHSAG057796.1	-0.625038	[-1.04931798; -0.20075718]	0.00388421	0	0.89879	FEM
NONHSAG084024.1	0.62259	[0.19987060; 1.04530867]	0.00389268	0	0.979257	FEM
NONHSAG073326.1	0.633627	[0.20338096; 1.06387354]	0.00389543	0.0733412	0.373555	FEM
NONHSAG096876.1	0.627889	[0.20142308; 1.05435523]	0.00390516	0	0.708418	FEM
NONHSAG074644.1	0.626175	[0.20085160; 1.05149879]	0.00390699	0	0.814241	FEM
NONHSAG094584.1	0.630548	[0.20212446; 1.05897076]	0.00391784	0	0.52253	FEM
NONHSAG115036.1	0.637771	[0.20434485; 1.07119644]	0.00392571	0.299372	0.189082	FEM
NONHSAG060602.1	0.632743	[0.20270767; 1.06277776]	0.0039279	0.0544517	0.388148	FEM
NONHSAG009665.2	0.631549	[0.20232279; 1.06077436]	0.0039281	0	0.452696	FEM
NONHSAG039515.2	0.646153	[0.20687673; 1.08542946]	0.00393833	0.511408	0.0456638	FEM
NONHSAG111703.1	-0.623161	[-1.04681795; -0.19950308]	0.00393936	0	0.936066	FEM
NONHSAG017074.3	0.631126	[0.20204508; 1.06020645]	0.00394004	0	0.4643	FEM
NONHSAG019920.2	-0.630978	[-1.06006730; -0.20188903]	0.00394919	0	0.46311	FEM
NONHSAG009363.2	0.625182	[0.19994720; 1.05041690]	0.00395661	0	0.819871	FEM
NONHSAG027452.2	-0.642978	[-1.08049032; -0.20546535]	0.00397097	0.463897	0.0707269	FEM
NONHSAG002641.2	0.633706	[0.20246347; 1.06494887]	0.00397426	0.162024	0.30246	FEM
NONHSAG078326.1	-0.624033	[-1.04870970; -0.19935679]	0.00397565	0	0.865503	FEM
NONHSAG006929.2	0.62221	[0.19876758; 1.04565233]	0.00397623	0	0.947136	FEM
NONHSAG111012.1	0.628266	[0.20067811; 1.05585291]	0.00397827	0	0.596756	FEM
NONHSAG000058.2	-0.625755	[-1.05170851; -0.19980114]	0.00398467	0	0.752395	FEM
NONHSAG081091.1	0.635848	[0.20296410; 1.06873158]	0.00398969	0.27168	0.2117	FEM
NONHSAG055260.2	0.635907	[0.20297645; 1.06883837]	0.00399025	0.274444	0.209428	FEM
NONHSAG014679.3	0.623143	[0.19888541; 1.04740142]	0.0039917	0	0.896331	FEM
NONHSAG049655.3	0.622983	[0.19880632; 1.04716001]	0.0039941	0	0.901658	FEM
NONHSAG033589.3	0.630041	[0.20103830; 1.05904336]	0.00399582	0	0.468065	FEM
NONHSAG074502.1	0.622024	[0.19846145; 1.04558585]	0.00399743	0	0.940053	FEM
NONHSAG093836.1	-0.630003	[-1.05903057; -0.20097629]	0.00400008	0	0.465816	FEM
NONHSAG022065.2	0.627631	[0.20018694; 1.05507595]	0.00400287	0	0.609254	FEM
NONHSAG032924.2	0.634231	[0.20226360; 1.06619745]	0.00400525	0.215297	0.258409	FEM
NONHSAG084444.1	0.630136	[0.20091831; 1.05935413]	0.00400862	0	0.448805	FEM
NONHSAG113082.1	0.621257	[0.19802371; 1.04449053]	0.00401411	0	0.956221	FEM
NONHSAG105141.1	-0.631309	[-1.06141434; -0.20120445]	0.0040161	0.0662011	0.379097	FEM
NONHSAG011184.2	-0.62207	[-1.04589785; -0.19824229]	0.00401761	0	0.923978	FEM
NONHSAG085046.1	0.628785	[0.20023179; 1.05733904]	0.0040305	0	0.505172	FEM
NONHSAG032682.2	-0.618114	[-1.03945605; -0.19677207]	0.00403586	0	0.999343	FEM
NONHSAG056128.1	0.634201	[0.20188190; 1.06652086]	0.00403684	0.239845	0.238021	FEM
NONHSAG004205.2	0.622078	[0.19794838; 1.04620710]	0.00404328	0	0.90303	FEM
NONHSAG001017.2	0.622885	[0.19817718; 1.04759265]	0.00404571	0	0.859214	FEM
NONHSAG029551.2	0.645363	[0.20527451; 1.08545072]	0.00405025	0.532263	0.0364417	FEM
NONHSAG097532.1	-0.635954	[-1.06967317; -0.20223510]	0.00405423	0.318556	0.17366	FEM
NONHSAG101355.1	0.623142	[0.19814576; 1.04813759]	0.00405552	0	0.835521	FEM
NONHSAG002475.2	0.629099	[0.19999386; 1.05820447]	0.0040595	0	0.456167	FEM
NONHSAG115013.1	0.62222	[0.19778838; 1.04665105]	0.00406111	0	0.880459	FEM
NONHSAG066046.1	0.621218	[0.19744793; 1.04498856]	0.00406304	0	0.925845	FEM
NONHSAG062852.2	-0.623729	[-1.04929337; -0.19816535]	0.00407005	0	0.783983	FEM
NONHSAG026396.2	0.634344	[0.20144949; 1.06723837]	0.0040776	0.275214	0.208796	FEM
NONHSAG005225.2	0.640356	[0.20333737; 1.07737495]	0.00407942	0.450608	0.0786669	FEM
NONHSAG006530.2	0.632462	[0.20076279; 1.06416119]	0.00408525	0.200685	0.270539	FEM
NONHSAG108963.1	-0.626238	[-1.05383811; -0.19863830]	0.00409819	0	0.589459	FEM
NONHSAG096626.1	0.624542	[0.19806213; 1.05102156]	0.00410152	0	0.696702	FEM
NONHSAG031522.2	0.633689	[0.20092193; 1.06645508]	0.00410504	0.268906	0.213983	FEM
NONHSAG071813.1	0.634096	[0.20104382; 1.06714740]	0.00410565	0.285017	0.200763	FEM
NONHSAG109629.1	0.621166	[0.19693053; 1.04540054]	0.00410686	0	0.892219	FEM
NONHSAG043417.2	0.622228	[0.19725263; 1.04720249]	0.00410814	0	0.834324	FEM
NONHSAG108924.1	0.621983	[0.19709858; 1.04686690]	0.00411485	0	0.842316	FEM
NONHSAG108756.1	0.625182	[0.19807319; 1.05229111]	0.00411828	0	0.634816	FEM
NONHSAG032111.2	-0.618827	[-1.04159504; -0.19605817]	0.00411841	0	0.973286	FEM
NONHSAG043520.2	0.621921	[0.19699096; 1.04685134]	0.0041226	0	0.837997	FEM
NONHSAG102085.1	0.623487	[0.19734164; 1.04963322]	0.00413538	0	0.726676	FEM
NONHSAG104956.1	-0.623567	[-1.04977152; -0.19736312]	0.00413571	0	0.72114	FEM
NONHSAG054830.3	-0.626216	[-1.05424063; -0.19819081]	0.00413664	0	0.547066	FEM
NONHSAG053535.2	-0.640087	[-1.07765264; -0.20252089]	0.00414178	0.468513	0.0680594	FEM
NONHSAG070983.1	0.61902	[0.19583846; 1.04220165]	0.00414328	0	0.95566	FEM
NONHSAG047547.2	0.623273	[0.19716981; 1.04937649]	0.00414453	0	0.730278	FEM
NONHSAG001727.2	0.623916	[0.19733002; 1.05050229]	0.00414834	0	0.683784	FEM
NONHSAG051366.2	0.640244	[0.20248384; 1.07800324]	0.00414921	0.474278	0.0647951	FEM
NONHSAG094223.1	0.638047	[0.20176395; 1.07433049]	0.00415139	0.428074	0.0929577	FEM
NONHSAG034442.2	0.634602	[0.20062458; 1.06857872]	0.0041557	0.334027	0.16142	FEM
NONHSAG112978.1	0.629638	[0.19892438; 1.06035123]	0.00416715	0.128819	0.329512	FEM
NONHSAG007132.2	-0.626719	[-1.05547307; -0.19796531]	0.00417041	0	0.480928	FEM
NONHSAG053134.2	0.622564	[0.19657449; 1.04855403]	0.00417735	0	0.738417	FEM
NONHSAG042000.3	0.631223	[0.19925762; 1.06318739]	0.00418179	0.222156	0.252711	FEM
NONHSAG084126.2	0.618973	[0.19525633; 1.04268868]	0.0041938	0	0.924862	FEM
NONHSAG045141.2	0.625841	[0.19739347; 1.05428828]	0.00419641	0	0.506411	FEM
NONHSAG085494.1	0.622352	[0.19624870; 1.04845617]	0.00420037	0	0.727153	FEM
NONHSAG013910.2	0.617932	[0.19480772; 1.04105655]	0.0042046	0	0.956603	FEM
NONHSAG102444.1	0.62525	[0.19700149; 1.05349930]	0.00421466	0	0.523162	FEM
NONHSAG000270.3	-0.619084	[-1.04316748; -0.19500071]	0.00421986	0	0.899525	FEM
NONHSAG109270.1	0.625937	[0.19706390; 1.05481050]	0.00422834	0	0.467738	FEM
NONHSAG021638.2	0.621923	[0.19568485; 1.04816130]	0.00423867	0	0.712337	FEM
NONHSAG003845.2	0.624328	[0.19635314; 1.05230260]	0.00424657	0	0.546807	FEM
NONHSAG081524.2	0.642194	[0.20194355; 1.08244379]	0.00424904	0.538629	0.0338546	FEM
NONHSAG007426.2	0.617437	[0.19414690; 1.04072793]	0.00425011	0	0.947366	FEM
NONHSAG106756.1	1.25037	[0.39310863; 2.10764120]	0.00425275	0.686363	0.00223797	REM
NONHSAG047295.2	0.63589	[0.19991192; 1.07186878]	0.00425339	0.419029	0.0989653	FEM
NONHSAG066583.1	0.625544	[0.19663129; 1.05445692]	0.00425589	0	0.463259	FEM
NONHSAG006506.2	0.620737	[0.19506997; 1.04640382]	0.00426042	0	0.765456	FEM
NONHSAG049441.2	-0.621788	[-1.04819017; -0.19538598]	0.00426171	0	0.695684	FEM
NONHSAG054955.2	0.623622	[0.19576687; 1.05147623]	0.00427926	0	0.55586	FEM
NONHSAG006711.2	0.615016	[0.19289854; 1.03713403]	0.00429452	0	0.989124	FEM
NONHSAG106855.1	-0.623584	[-1.05166716; -0.19550060]	0.00430221	0	0.534038	FEM
NONHSAG023328.2	0.620833	[0.19460511; 1.04706066]	0.0043052	0	0.71031	FEM
NONHSAG070702.1	0.631858	[0.19805175; 1.06566333]	0.00430602	0.33068	0.164051	FEM
NONHSAG046747.2	-0.629528	[-1.06176699; -0.19728928]	0.00430891	0.244385	0.234255	FEM
NONHSAG088421.1	0.636444	[0.19944903; 1.07343957]	0.0043096	0.454082	0.0765547	FEM
NONHSAG045116.2	0.629388	[0.19710614; 1.06167057]	0.00432141	0.247238	0.23189	FEM
NONHSAG027768.2	-0.617329	[-1.04143104; -0.19322605]	0.00433088	0	0.894148	FEM
NONHSAG011023.2	0.618046	[0.19343896; 1.04265344]	0.00433195	0	0.855558	FEM
NONHSAG043719.2	0.628429	[0.19658848; 1.06026974]	0.00434098	0.219651	0.254792	FEM
NONHSAG008705.2	-0.617157	[-1.04129345; -0.19302019]	0.00434484	0	0.891285	FEM
NONHSAG099719.1	0.618789	[0.19349190; 1.04408701]	0.00434841	0	0.795022	FEM
NONHSAG111439.1	0.618246	[0.19325010; 1.04324184]	0.00435501	0	0.821799	FEM
NONHSAG053404.2	0.616291	[0.19259266; 1.03999022]	0.0043593	0	0.920613	FEM
NONHSAG109997.1	0.616119	[0.19249310; 1.03974577]	0.00436352	0	0.92465	FEM
NONHSAG045005.2	0.629215	[0.19657817; 1.06185097]	0.00436409	0.269741	0.213296	FEM
NONHSAG113768.1	0.628548	[0.19634093; 1.06075601]	0.00436673	0.244249	0.234368	FEM
NONHSAG066581.1	0.631555	[0.19724932; 1.06586053]	0.0043695	0.354865	0.145277	FEM
NONHSAG042663.2	0.645555	[0.20160074; 1.08950908]	0.00437136	0.608043	0.0126221	FEM
NONHSAG111028.1	0.622078	[0.19415176; 1.05000410]	0.00438211	0	0.544117	FEM
NONHSAG023002.2	0.614993	[0.19192748; 1.03805814]	0.00438332	0	0.955053	FEM
NONHSAG043597.3	0.628226	[0.19599217; 1.06046022]	0.00438924	0.246641	0.232385	FEM
NONHSAG001153.2	0.628937	[0.19619554; 1.06167904]	0.00439092	0.276719	0.20756	FEM
NONHSAG048822.2	0.64489	[0.20102033; 1.08875975]	0.00440437	0.606964	0.0128569	FEM
NONHSAG046314.2	0.612716	[0.19095014; 1.03448120]	0.0044082	0	0.994288	FEM
NONHSAG058893.1	0.619421	[0.19301245; 1.04582930]	0.00441073	0	0.685594	FEM
NONHSAG095927.1	0.633985	[0.19753573; 1.07043446]	0.00441208	0.438342	0.0863215	FEM
NONHSAG101210.1	0.615398	[0.19162621; 1.03916903]	0.00442309	0	0.913817	FEM
NONHSAG073940.1	0.616927	[0.19201264; 1.04184201]	0.00443146	0	0.824103	FEM
NONHSAG014330.2	-0.617725	[-1.04320084; -0.19224880]	0.00443258	0	0.774685	FEM
NONHSAG000840.2	0.613643	[0.19094473; 1.03634159]	0.00443575	0	0.969831	FEM
NONHSAG041566.3	0.617611	[0.19210259; 1.04312029]	0.00444292	0	0.771146	FEM
NONHSAG049867.2	0.613782	[0.19078547; 1.03677906]	0.00445476	0	0.956667	FEM
NONHSAG112180.1	0.620559	[0.19288162; 1.04823637]	0.00445572	0	0.562487	FEM
NONHSAG015797.3	0.627066	[0.19488950; 1.05924162]	0.00445705	0.245328	0.233473	FEM
NONHSAG096064.1	0.613891	[0.19075340; 1.03702954]	0.00446097	0	0.949601	FEM
NONHSAG029723.3	0.614184	[0.19080005; 1.03756747]	0.00446512	0	0.936332	FEM
NONHSAG088097.1	-0.622436	[-1.05153368; -0.19333844]	0.00446747	0	0.437621	FEM
NONHSAG075751.1	0.630283	[0.19575171; 1.06481500]	0.00446969	0.367397	0.135792	FEM
NONHSAG044614.3	0.623135	[0.19347376; 1.05279645]	0.00447506	0.0479562	0.393113	FEM
NONHSAG056502.1	-0.62083	[-1.04893474; -0.19272519]	0.00447813	0	0.523681	FEM
NONHSAG043479.3	0.632561	[0.19627175; 1.06885014]	0.00448684	0.434726	0.0886356	FEM
NONHSAG079874.1	0.629598	[0.19520809; 1.06398693]	0.00450013	0.361598	0.140159	FEM
NONHSAG000482.2	-0.6413	[-1.08381202; -0.19878759]	0.00450455	0.585554	0.0181192	FEM
NONHSAG024146.2	0.616529	[0.19091810; 1.04214026]	0.00452261	0	0.758175	FEM
NONHSAG052855.2	0.611863	[0.18942324; 1.03430204]	0.00452735	0	0.977216	FEM
NONHSAG038502.2	0.614154	[0.19003314; 1.03827504]	0.00453681	0	0.885051	FEM
NONHSAG000427.2	0.617889	[0.19116025; 1.04461796]	0.00453951	0	0.648799	FEM
NONHSAG004023.3	-0.621331	[-1.05053188; -0.19212934]	0.00454851	0.00391691	0.426019	FEM
NONHSAG049312.2	0.611224	[0.18883816; 1.03360948]	0.00456442	0	0.97837	FEM
NONHSAG024550.2	0.626649	[0.19359705; 1.05970090]	0.00456505	0.298762	0.189576	FEM
NONHSAG112078.1	-0.620878	[-1.04996379; -0.19179235]	0.00456711	0	0.434173	FEM
NONHSAG089078.1	-0.629371	[-1.06437202; -0.19436977]	0.00457141	0.388681	0.120134	FEM
NONHSAG109479.1	0.610398	[0.18847962; 1.03231655]	0.00457437	0	0.990337	FEM
NONHSAG095853.1	0.614372	[0.18968491; 1.03905906]	0.00457645	0	0.83844	FEM
NONHSAG052508.2	0.609661	[0.18811688; 1.03120526]	0.00458741	0	0.995963	FEM
NONHSAG068797.1	0.621973	[0.19183375; 1.05211284]	0.00459519	0.0990105	0.353382	FEM
NONHSAG051720.2	0.616035	[0.18996137; 1.04210936]	0.00459911	0	0.710609	FEM
NONHSAG048362.2	0.637179	[0.19645387; 1.07790403]	0.00460164	0.553027	0.0284015	FEM
NONHSAG022888.3	0.612134	[0.18860704; 1.03566017]	0.00461369	0	0.923402	FEM
NONHSAG052596.2	-0.613898	[-1.03864689; -0.18914875]	0.00461387	0	0.831271	FEM
NONHSAG026281.2	0.622762	[0.19185277; 1.05367046]	0.00461643	0.163664	0.301114	FEM
NONHSAG073950.1	0.634175	[0.19534243; 1.07300746]	0.00461889	0.510279	0.0461948	FEM
NONHSAG002689.2	-0.641462	[-1.08534644; -0.19757696]	0.00461981	0.609072	0.0124009	FEM
NONHSAG030485.3	0.610894	[0.18814421; 1.03364347]	0.00462151	0	0.964037	FEM
NONHSAG108271.1	-0.616029	[-1.04236954; -0.18968814]	0.00462512	0	0.683334	FEM
NONHSAG012114.2	-0.617252	[-1.04450026; -0.19000391]	0.00463096	0	0.595888	FEM
NONHSAG094085.1	0.616402	[0.18973872; 1.04306605]	0.00463131	0	0.652149	FEM
NONHSAG017542.2	0.623633	[0.19181558; 1.05545105]	0.00464547	0.228712	0.247265	FEM
NONHSAG107589.1	0.61654	[0.18962942; 1.04345107]	0.0046459	0	0.626644	FEM
NONHSAG062217.1	0.623917	[0.19183553; 1.05599861]	0.00465188	0.245646	0.23321	FEM
NONHSAG065366.2	0.629872	[0.19360856; 1.06613450]	0.00465734	0.436564	0.0874563	FEM
NONHSAG007896.3	0.61206	[0.18789584; 1.03622406]	0.00468048	0	0.876616	FEM
NONHSAG027562.3	0.615645	[0.18897043; 1.04231998]	0.00468301	0	0.648307	FEM
NONHSAG038745.2	0.622145	[0.19095205; 1.05333854]	0.00468431	0.187266	0.281655	FEM
NONHSAG060386.1	0.627327	[0.19251895; 1.06213433]	0.00468654	0.383361	0.12399	FEM
NONHSAG076067.1	0.615842	[0.18895309; 1.04273114]	0.00469055	0	0.627607	FEM
NONHSAG011350.3	-0.615777	[-1.04271222; -0.18884166]	0.00469943	0	0.621897	FEM
NONHSAG018592.2	0.623618	[0.19120986; 1.05602662]	0.00470294	0.266945	0.215599	FEM
NONHSAG036505.3	0.616185	[0.18882264; 1.04354804]	0.00471345	0	0.581389	FEM
NONHSAG063216.1	0.617626	[0.18918181; 1.04606921]	0.00472143	0	0.482779	FEM
NONHSAG018005.2	0.613844	[0.18800174; 1.03968667]	0.00472357	0	0.726509	FEM
NONHSAG053503.2	0.614531	[0.18814741; 1.04091432]	0.00472989	0	0.674504	FEM
NONHSAG094398.1	0.616624	[0.18878431; 1.04446274]	0.00473026	0	0.535818	FEM
NONHSAG075985.1	0.624705	[0.19125273; 1.05815658]	0.00473081	0.323768	0.169515	FEM
NONHSAG055207.3	-0.614241	[-1.04051892; -0.18796259]	0.00473929	0	0.6841	FEM
NONHSAG109529.1	0.621336	[0.19011859; 1.05255378]	0.00474076	0.191053	0.278521	FEM
NONHSAG109693.1	0.61779	[0.18898960; 1.04658985]	0.00474504	0	0.451418	FEM
NONHSAG002091.3	0.621154	[0.18997727; 1.05233135]	0.00474907	0.188568	0.280578	FEM
NONHSAG023432.2	0.610919	[0.18682418; 1.03501481]	0.00475132	0	0.87913	FEM
NONHSAG050006.2	0.609264	[0.18608755; 1.03243950]	0.00477414	0	0.939485	FEM
NONHSAG064161.2	-0.608822	[-1.03172552; -0.18591791]	0.00477759	0	0.953343	FEM
NONHSAG099744.1	0.611031	[0.18658739; 1.03547363]	0.00477808	0	0.850731	FEM
NONHSAG034702.2	-0.609579	[-1.03301606; -0.18614233]	0.00477827	0	0.92386	FEM
NONHSAG069477.1	0.605805	[0.18494066; 1.02666971]	0.00478319	0	0.999633	FEM
NONHSAG018692.2	0.631677	[0.19281377; 1.07054006]	0.00478559	0.51321	0.0448225	FEM
NONHSAG104832.1	0.632759	[0.19291869; 1.07259888]	0.00480719	0.536462	0.0347232	FEM
NONHSAG002234.3	0.617902	[0.18837332; 1.04743133]	0.00480875	0.0511863	0.390647	FEM
NONHSAG002089.2	-1.21419	[-2.05822172; -0.37015187]	0.00480897	0.683984	0.00239271	REM
NONHSAG107384.1	-0.624003	[-1.05778965; -0.19021626]	0.0048104	0.341958	0.155225	FEM
NONHSAG090972.1	-0.611052	[-1.03587996; -0.18622398]	0.00481482	0	0.816617	FEM
NONHSAG110125.1	0.609209	[0.18562062; 1.03279737]	0.00481898	0	0.912901	FEM
NONHSAG041516.2	0.606712	[0.18482953; 1.02859467]	0.00482202	0	0.988691	FEM
NONHSAG060782.1	0.609236	[0.18552314; 1.03294867]	0.00482955	0	0.904558	FEM
NONHSAG110434.1	0.62203	[0.18940692; 1.05465402]	0.00483076	0.282808	0.20257	FEM
NONHSAG055623.2	0.606867	[0.18477236; 1.02896128]	0.0048325	0	0.983411	FEM
NONHSAG088748.1	-0.607295	[-1.02969133; -0.18489881]	0.00483289	0	0.973878	FEM
NONHSAG110588.1	0.626345	[0.19069145; 1.06199896]	0.00483361	0.418528	0.0993028	FEM
NONHSAG074325.1	0.608525	[0.18523085; 1.03181981]	0.00483715	0	0.930785	FEM
NONHSAG085975.2	0.612784	[0.18641833; 1.03914903]	0.00484799	0	0.670342	FEM
NONHSAG008602.2	0.610364	[0.18566914; 1.03505931]	0.00484931	0	0.826775	FEM
NONHSAG064661.1	0.610835	[0.18569830; 1.03597165]	0.00486073	0	0.786964	FEM
NONHSAG015975.2	0.606981	[0.18450169; 1.02945948]	0.00486323	0	0.970361	FEM
NONHSAG078697.1	0.620928	[0.18862858; 1.05322685]	0.00487434	0.265599	0.216708	FEM
NONHSAG042935.2	0.627646	[0.19066103; 1.06463088]	0.00487517	0.463154	0.0711608	FEM
NONHSAG040839.2	0.606833	[0.18427635; 1.02938982]	0.00488147	0	0.96691	FEM
NONHSAG106357.1	0.610449	[0.18526159; 1.03563579]	0.00489282	0	0.78008	FEM
NONHSAG022043.2	0.612395	[0.18576649; 1.03902393]	0.00490144	0	0.641662	FEM
NONHSAG105202.1	0.616371	[0.18695914; 1.04578232]	0.00490277	0.0440777	0.396064	FEM
NONHSAG015181.2	0.618475	[0.18757744; 1.04937265]	0.00490476	0.173565	0.292968	FEM
NONHSAG048790.2	0.622822	[0.18881078; 1.05683356]	0.00491318	0.354213	0.145775	FEM
NONHSAG048008.2	0.612195	[0.18549562; 1.03889416]	0.0049226	0	0.634807	FEM
NONHSAG078587.1	0.618057	[0.18723986; 1.04887365]	0.00492579	0.168184	0.297399	FEM
NONHSAG103193.1	0.604801	[0.18311633; 1.02648522]	0.00493679	0	0.991517	FEM
NONHSAG106390.1	0.608492	[0.18416140; 1.03282242]	0.00494417	0	0.853302	FEM
NONHSAG079308.1	0.614593	[0.18585763; 1.04332749]	0.00495931	0	0.446847	FEM
NONHSAG060046.1	-0.615718	[-1.04536381; -0.18607193]	0.00497202	0.0710449	0.375341	FEM
NONHSAG099003.1	0.623923	[0.18845372; 1.05939136]	0.00498176	0.41454	0.102001	FEM
NONHSAG040590.2	0.612877	[0.18509598; 1.04065759]	0.00498394	0	0.530656	FEM
NONHSAG022994.3	-0.610144	[-1.03608474; -0.18420384]	0.00499077	0	0.705227	FEM
NONHSAG002036.2	-0.624918	[-1.06119993; -0.18863607]	0.00499356	0.443282	0.0832022	FEM
NONHSAG071915.1	0.605373	[0.18271982; 1.02802553]	0.00499524	0	0.960799	FEM
NONHSAG030538.2	0.605859	[0.18278351; 1.02893477]	0.0050038	0	0.939035	FEM
NONHSAG054799.2	-0.627119	[-1.06505696; -0.18918096]	0.00500545	0.49239	0.055043	FEM
NONHSAG051677.2	0.619925	[0.18690546; 1.05294440]	0.00501606	0.308875	0.181412	FEM
NONHSAG000110.2	-0.625595	[-1.06261070; -0.18857864]	0.00501968	0.466333	0.0693134	FEM
NONHSAG106003.1	0.603668	[0.18191056; 1.02542472]	0.00502574	0	0.989427	FEM
NONHSAG027924.3	0.619332	[0.18653384; 1.05212939]	0.00503555	0.297687	0.190448	FEM
NONHSAG020374.2	0.605896	[0.18238646; 1.02940565]	0.00504598	0	0.911352	FEM
NONHSAG040425.2	0.612254	[0.18421674; 1.04029175]	0.00505457	0	0.504533	FEM
NONHSAG021712.2	0.619879	[0.18649690; 1.05326171]	0.005056	0.328014	0.166154	FEM
NONHSAG043334.2	0.615984	[0.18532143; 1.04664744]	0.00505637	0.161081	0.303234	FEM
NONHSAG021653.2	-0.623244	[-1.05898676; -0.18750085]	0.00505683	0.425614	0.0945767	FEM
NONHSAG105226.1	0.604533	[0.18184893; 1.02721637]	0.0050592	0	0.958041	FEM
NONHSAG113209.1	0.623682	[0.18758268; 1.05978133]	0.00506188	0.437853	0.0866329	FEM
NONHSAG078079.1	0.608472	[0.18300061; 1.03394319]	0.00506264	0	0.746739	FEM
NONHSAG092967.1	0.623145	[0.18739661; 1.05889365]	0.00506436	0.425848	0.0944222	FEM
NONHSAG028084.2	-0.605381	[-1.02871977; -0.18204163]	0.00506568	0	0.922103	FEM
NONHSAG033186.2	0.62116	[0.18659386; 1.05572639]	0.00508524	0.381515	0.125338	FEM
NONHSAG095550.1	0.63003	[0.18920376; 1.07085645]	0.00509071	0.560024	0.0259519	FEM
NONHSAG044131.3	0.608613	[0.18276005; 1.03446608]	0.00509196	0	0.709567	FEM
NONHSAG039503.2	0.61258	[0.18394571; 1.04121483]	0.00509254	0	0.45163	FEM
NONHSAG007629.2	0.606004	[0.18195379; 1.03005335]	0.00509432	0	0.870768	FEM
NONHSAG049807.2	0.608093	[0.18253079; 1.03365612]	0.00509957	0	0.737067	FEM
NONHSAG114639.1	1.12709	[0.33825586; 1.91591605]	0.00510296	0.645018	0.00620903	REM
NONHSAG049106.2	-0.605559	[-1.02943562; -0.18168164]	0.00510879	0	0.883655	FEM
NONHSAG106156.1	-0.624006	[-1.06081390; -0.18719862]	0.00511059	0.461262	0.0722712	FEM
NONHSAG011800.3	0.624879	[0.18730321; 1.06245553]	0.00512655	0.483899	0.0595179	FEM
NONHSAG072220.1	-0.610537	[-1.03809267; -0.18298193]	0.00512888	0	0.545353	FEM
NONHSAG041789.3	0.631535	[0.18925079; 1.07381999]	0.00513133	0.587438	0.0176094	FEM
NONHSAG069620.1	-0.618059	[-1.05095388; -0.18516397]	0.0051363	0.305444	0.184175	FEM
NONHSAG006479.2	0.61419	[0.18396669; 1.04441349]	0.00514025	0.128823	0.329508	FEM
NONHSAG107493.1	0.605029	[0.18118328; 1.02887478]	0.0051444	0	0.884336	FEM
NONHSAG104553.1	0.622074	[0.18621752; 1.05793092]	0.00515157	0.431102	0.0909797	FEM
NONHSAG008515.2	0.603019	[0.18049992; 1.02553781]	0.00515299	0	0.963658	FEM
NONHSAG054478.2	-0.619124	[-1.05299720; -0.18525045]	0.0051602	0.353273	0.146495	FEM
NONHSAG112104.1	-0.604178	[-1.02760887; -0.18074783]	0.00516345	0	0.913448	FEM
NONHSAG019089.2	0.610999	[0.18275197; 1.03924556]	0.00516723	0	0.481825	FEM
NONHSAG113782.1	0.615984	[0.18421142; 1.04775639]	0.00517051	0.242143	0.236115	FEM
NONHSAG037975.2	-0.623571	[-1.06066216; -0.18648005]	0.00517054	0.470629	0.0668523	FEM
NONHSAG015093.2	0.614275	[0.18358961; 1.04496053]	0.00518203	0.167449	0.298003	FEM
NONHSAG003704.2	-0.610978	[-1.03936355; -0.18259240]	0.00518326	0	0.469233	FEM
NONHSAG095062.1	0.621203	[0.18536216; 1.05704293]	0.00521274	0.43151	0.0907148	FEM
NONHSAG061379.1	0.620376	[0.18496227; 1.05578984]	0.00522861	0.416698	0.100538	FEM
NONHSAG053697.2	0.604592	[0.18024960; 1.02893359]	0.00522931	0	0.841584	FEM
NONHSAG047821.3	-0.608921	[-1.03631997; -0.18152178]	0.00523127	0	0.555107	FEM
NONHSAG042032.2	0.599752	[0.17865481; 1.02084930]	0.00524562	0	0.997462	FEM
NONHSAG022566.2	0.60548	[0.18024083; 1.03071971]	0.00525844	0	0.760797	FEM
NONHSAG106498.1	0.60312	[0.17952688; 1.02671235]	0.00525964	0	0.899591	FEM
NONHSAG045035.3	-0.608065	[-1.03517439; -0.18095476]	0.00526432	0	0.579751	FEM
NONHSAG114415.1	0.617887	[0.18378367; 1.05198993]	0.00527417	0.366061	0.136794	FEM
NONHSAG039445.2	0.621356	[0.18474712; 1.05796550]	0.0052813	0.457586	0.0744504	FEM
NONHSAG076256.1	0.622601	[0.18505926; 1.06014209]	0.00528732	0.48505	0.0589012	FEM
NONHSAG032224.3	0.612228	[0.18182303; 1.04263377]	0.00530355	0.14964	0.312598	FEM
NONHSAG093552.1	0.625806	[0.18582731; 1.06578376]	0.00530645	0.544681	0.0314949	FEM
NONHSAG000099.2	0.602184	[0.17874172; 1.02562538]	0.00531414	0	0.908328	FEM
NONHSAG053821.2	0.6034	[0.17908411; 1.02771524]	0.00531614	0	0.840762	FEM
NONHSAG091381.1	0.602429	[0.17879247; 1.02606618]	0.00531653	0	0.894403	FEM
NONHSAG040260.2	0.617593	[0.18326973; 1.05191640]	0.00531897	0.375948	0.129429	FEM
NONHSAG031582.2	0.606941	[0.18007541; 1.03380758]	0.00532256	0	0.601969	FEM
NONHSAG085534.1	0.613036	[0.18181968; 1.04425305]	0.00532936	0.210348	0.262519	FEM
NONHSAG090720.1	0.629564	[0.18668340; 1.07244390]	0.0053333	0.599217	0.0146273	FEM
NONHSAG094075.1	0.602882	[0.17865725; 1.02710579]	0.00534565	0	0.847854	FEM
NONHSAG105403.1	0.614547	[0.18211404; 1.04698004]	0.00534566	0.28562	0.200271	FEM
NONHSAG049901.3	0.604279	[0.17900197; 1.02955539]	0.00535314	0	0.753702	FEM
NONHSAG031215.2	0.60426	[0.17899250; 1.02952775]	0.00535357	0	0.754192	FEM
NONHSAG033625.2	0.622436	[0.18433081; 1.06054136]	0.00535837	0.501096	0.0506372	FEM
NONHSAG104819.1	0.611874	[0.18118870; 1.04255900]	0.00535988	0.173212	0.293259	FEM
NONHSAG101991.1	-0.606422	[-1.03327997; -0.17956337]	0.00536105	0	0.601177	FEM
NONHSAG004165.3	0.608483	[0.18013387; 1.03683271]	0.00536535	0	0.464965	FEM
NONHSAG007289.2	0.601548	[0.17792954; 1.02516700]	0.00538182	0	0.894061	FEM
NONHSAG017086.2	0.615727	[0.18201863; 1.04943620]	0.005393	0.350635	0.148518	FEM
NONHSAG033048.3	-0.599058	[-1.02102872; -0.17708755]	0.00539337	0	0.980022	FEM
NONHSAG100766.1	0.604431	[0.17867155; 1.03018994]	0.00539382	0	0.705423	FEM
NONHSAG040493.2	-1.3145	[-2.24055956; -0.38844978]	0.00539991	0.724968	0.00063085	REM
NONHSAG034700.2	0.608256	[0.17971486; 1.03679735]	0.00540327	0	0.447778	FEM
NONHSAG012540.2	0.604916	[0.17872524; 1.03110752]	0.00540358	0	0.663041	FEM
NONHSAG071293.1	0.600323	[0.17732905; 1.02331633]	0.00540785	0	0.934167	FEM
NONHSAG036752.2	0.616388	[0.18193471; 1.05084172]	0.0054228	0.383386	0.123972	FEM
NONHSAG058214.1	0.609529	[0.17976763; 1.03929008]	0.00543821	0.100248	0.3524	FEM
NONHSAG004983.2	-0.603117	[-1.02841704; -0.17781744]	0.0054447	0	0.747616	FEM
NONHSAG108322.1	0.611732	[0.18030475; 1.04315891]	0.00545038	0.228073	0.247795	FEM
NONHSAG074252.1	-0.603839	[-1.02971813; -0.17795917]	0.00545247	0	0.69127	FEM
NONHSAG024671.3	0.62928	[0.18536377; 1.07319535]	0.00546227	0.616045	0.0109688	FEM
NONHSAG050773.2	0.629325	[0.18514644; 1.07350377]	0.00548658	0.620087	0.0101918	FEM
NONHSAG079380.1	0.60236	[0.17719969; 1.02752103]	0.0054881	0	0.758879	FEM
NONHSAG024741.3	-0.609422	[-1.03960090; -0.17924407]	0.00549171	0.140068	0.320396	FEM
NONHSAG049364.2	0.599963	[0.17645031; 1.02347565]	0.00549299	0	0.897754	FEM
NONHSAG017347.2	0.608872	[0.17906612; 1.03867854]	0.00549347	0.107107	0.346943	FEM
NONHSAG030589.2	-0.599854	[-1.02331546; -0.17639207]	0.00549588	0	0.901099	FEM
NONHSAG042811.3	0.603087	[0.17733574; 1.02883883]	0.00549667	0	0.7026	FEM
NONHSAG028399.2	0.613143	[0.18014127; 1.04614449]	0.0055131	0.31956	0.17286	FEM
NONHSAG095347.1	0.608873	[0.17887446; 1.03887125]	0.00551444	0.123833	0.333534	FEM
NONHSAG029835.2	0.605191	[0.17776633; 1.03261504]	0.00551735	0	0.541981	FEM
NONHSAG107429.1	0.616253	[0.18099915; 1.05150675]	0.00551914	0.415728	0.101195	FEM
NONHSAG064369.1	0.608622	[0.17874999; 1.03849377]	0.00552	0.113212	0.342065	FEM
NONHSAG066535.1	0.602435	[0.17688792; 1.02798269]	0.00552499	0	0.721151	FEM
NONHSAG012359.2	0.606824	[0.17795596; 1.03569230]	0.00554928	0.0171514	0.416273	FEM
NONHSAG030424.2	0.602914	[0.17673819; 1.02909078]	0.0055572	0	0.658981	FEM
NONHSAG058123.1	0.606842	[0.17786557; 1.03581921]	0.00555985	0.0291464	0.407332	FEM
NONHSAG101117.1	0.602281	[0.17649017; 1.02807241]	0.00556414	0	0.696136	FEM
NONHSAG032574.2	0.604642	[0.17716833; 1.03211519]	0.00556564	0	0.535049	FEM
NONHSAG082951.1	0.597806	[0.17515414; 1.02045736]	0.00556689	0	0.949386	FEM
NONHSAG107274.1	-0.600211	[-1.02459632; -0.17582644]	0.00557053	0	0.826253	FEM
NONHSAG029851.2	0.615635	[0.18031730; 1.05095324]	0.00557352	0.418948	0.0990202	FEM
NONHSAG050857.2	0.600196	[0.17578823; 1.02460279]	0.00557428	0	0.824108	FEM
NONHSAG076294.1	0.60779	[0.17800381; 1.03757565]	0.00557524	0.107653	0.346507	FEM
NONHSAG113788.1	0.605651	[0.17729584; 1.03400662]	0.00558429	0	0.457118	FEM
NONHSAG090895.1	0.605474	[0.17719637; 1.03375200]	0.00558958	0	0.463575	FEM
NONHSAG012912.2	0.603385	[0.17653833; 1.03023245]	0.00559479	0	0.592851	FEM
NONHSAG009236.2	-0.595436	[-1.01672204; -0.17415050]	0.00560181	0	0.993559	FEM
NONHSAG085463.1	-0.609093	[-1.04016100; -0.17802535]	0.00561503	0.208555	0.264008	FEM
NONHSAG085326.1	-0.600168	[-1.02494842; -0.17538712]	0.00561835	0	0.789066	FEM
NONHSAG090731.1	0.608672	[0.17782599; 1.03951726]	0.00562347	0.193351	0.276618	FEM
NONHSAG111056.1	0.602573	[0.17603453; 1.02911106]	0.00562455	0	0.620822	FEM
NONHSAG047615.2	-0.601703	[-1.02762633; -0.17578004]	0.0056246	0	0.680752	FEM
NONHSAG045117.2	0.596955	[0.17423615; 1.01967413]	0.00564236	0	0.944198	FEM
NONHSAG043283.2	0.600424	[0.17522386; 1.02562429]	0.00564515	0	0.749379	FEM
NONHSAG111248.1	0.593889	[0.17330180; 1.01447596]	0.00564685	0	0.999393	FEM
NONHSAG096525.2	0.596039	[0.17369451; 1.01838261]	0.00567354	0	0.96198	FEM
NONHSAG033240.2	0.597152	[0.17401736; 1.02028725]	0.00567373	0	0.918849	FEM
NONHSAG006297.2	0.610593	[0.17790277; 1.04328241]	0.00567721	0.307065	0.182869	FEM
NONHSAG015559.2	0.607733	[0.17693135; 1.03853454]	0.00569268	0.192283	0.277502	FEM
NONHSAG053784.2	0.611883	[0.17812546; 1.04564009]	0.00569424	0.358744	0.142322	FEM
NONHSAG036047.3	0.603797	[0.17575468; 1.03183840]	0.00569613	0	0.479362	FEM
NONHSAG008992.2	0.598976	[0.17432940; 1.02362190]	0.00569864	0	0.799023	FEM
NONHSAG043483.2	0.607618	[0.17681180; 1.03842333]	0.00570231	0.192699	0.277158	FEM
NONHSAG061821.1	0.601228	[0.17491298; 1.02754224]	0.00570678	0	0.639639	FEM
NONHSAG039225.2	0.607165	[0.17660790; 1.03772155]	0.00571041	0.174746	0.291995	FEM
NONHSAG012090.2	0.606581	[0.17638700; 1.03677556]	0.00571617	0.146768	0.314941	FEM
NONHSAG020243.2	0.605519	[0.17605358; 1.03498527]	0.00571895	0.0840777	0.365164	FEM
NONHSAG025746.2	0.601936	[0.17500249; 1.02887006]	0.00572	0	0.57991	FEM
NONHSAG000809.2	0.604464	[0.17563266; 1.03329522]	0.00573184	0.0220702	0.412619	FEM
NONHSAG073982.1	0.604016	[0.17549826; 1.03253319]	0.00573231	0	0.438624	FEM
NONHSAG051500.2	0.594798	[0.17277481; 1.01682136]	0.00573752	0	0.973655	FEM
NONHSAG083626.1	0.60271	[0.17505437; 1.03036599]	0.00573964	0	0.512678	FEM
NONHSAG082263.1	-0.60641	[-1.03683045; -0.17598943]	0.0057554	0.166194	0.299035	FEM
NONHSAG019839.2	0.604263	[0.17535866; 1.03316819]	0.00575629	0.0300551	0.406651	FEM
NONHSAG040916.3	-0.612019	[-1.04645604; -0.17758152]	0.0057594	0.388531	0.120242	FEM
NONHSAG009737.2	-0.593658	[-1.01506663; -0.17225002]	0.00575987	0	0.990344	FEM
NONHSAG023614.3	0.602312	[0.17475100; 1.02987330]	0.005761	0	0.520187	FEM
NONHSAG065035.1	-0.605229	[-1.03496510; -0.17549190]	0.00577294	0.110329	0.34437	FEM
NONHSAG062190.1	0.603182	[0.17489549; 1.03146775]	0.00577327	0	0.456339	FEM
NONHSAG025541.2	-0.612794	[-1.04791158; -0.17767712]	0.0057739	0.414653	0.101925	FEM
NONHSAG106784.1	0.598509	[0.17352975; 1.02348894]	0.00577453	0	0.765611	FEM
NONHSAG052202.2	-0.608252	[-1.04035420; -0.17614999]	0.00579767	0.278207	0.206339	FEM
NONHSAG078459.1	0.605956	[0.17546019; 1.03645230]	0.00580051	0.173028	0.293411	FEM
NONHSAG035163.2	0.612893	[0.17744809; 1.04833834]	0.00580284	0.42686	0.0937555	FEM
NONHSAG105045.1	0.60451	[0.17488112; 1.03413820]	0.00581879	0.102482	0.350625	FEM
NONHSAG077291.1	0.607403	[0.17571092; 1.03909467]	0.00581961	0.254258	0.226076	FEM
NONHSAG113774.1	-0.600164	[-1.02676386; -0.17356368]	0.00582572	0	0.607763	FEM
NONHSAG021914.2	-0.594475	[-1.01709583; -0.17185366]	0.00583326	0	0.945434	FEM
NONHSAG013789.2	-0.602989	[-1.03179359; -0.17418435]	0.00584826	0.0237478	0.411369	FEM
NONHSAG042749.2	0.602656	[0.17408076; 1.03123129]	0.00584911	0	0.430075	FEM
NONHSAG112430.1	0.597877	[0.17265386; 1.02309947]	0.00585449	0	0.738722	FEM
NONHSAG053584.2	0.605613	[0.17487594; 1.03635100]	0.00585588	0.192354	0.277444	FEM
NONHSAG107677.1	0.59393	[0.17126212; 1.01659798]	0.00588397	0	0.941969	FEM
NONHSAG015189.3	0.591271	[0.17047607; 1.01206586]	0.00588624	0	0.997853	FEM
NONHSAG084957.1	0.60502	[0.17437970; 1.03566095]	0.00589321	0.186494	0.282294	FEM
NONHSAG113858.1	0.596057	[0.17177787; 1.02033530]	0.00589535	0	0.824847	FEM
NONHSAG100727.1	-0.595192	[-1.01889033; -0.17149334]	0.00589949	0	0.872349	FEM
NONHSAG076217.1	0.595538	[0.17157180; 1.01950393]	0.00590197	0	0.850927	FEM
NONHSAG087481.1	-0.617577	[-1.05725096; -0.17790218]	0.0059041	0.543868	0.0318063	FEM
NONHSAG014202.2	0.610622	[0.17587404; 1.04537080]	0.00590695	0.402948	0.109999	FEM
NONHSAG062985.1	0.602828	[0.17358086; 1.03207417]	0.00591251	0.0705362	0.375736	FEM
NONHSAG050988.2	0.594967	[0.17126282; 1.01867173]	0.00591893	0	0.871124	FEM
NONHSAG036049.2	0.590999	[0.16998711; 1.01201080]	0.00593472	0	0.995575	FEM
NONHSAG084163.1	0.598567	[0.17206017; 1.02507450]	0.00594686	0	0.611656	FEM
NONHSAG037559.2	0.597482	[0.17167262; 1.02329068]	0.00595572	0	0.679471	FEM
NONHSAG030977.3	0.602266	[0.17302085; 1.03151187]	0.00595881	0.0723889	0.374296	FEM
NONHSAG096535.1	0.593584	[0.17048681; 1.01668109]	0.00596351	0	0.914171	FEM
NONHSAG094978.1	-0.606229	[-1.03835329; -0.17410562]	0.00596503	0.282842	0.202542	FEM
NONHSAG108331.1	-0.591851	[-1.01376442; -0.16993835]	0.00596954	0	0.974559	FEM
NONHSAG105622.1	0.606113	[0.17403283; 1.03819262]	0.00596958	0.28057	0.204402	FEM
NONHSAG084011.2	0.596525	[0.17126515; 1.02178547]	0.00597133	0	0.72985	FEM
NONHSAG103082.1	0.597842	[0.17163070; 1.02405380]	0.00597281	0	0.639806	FEM
NONHSAG113707.1	0.608732	[0.17475284; 1.04271124]	0.00597329	0.373285	0.131401	FEM
NONHSAG043556.3	-0.598446	[-1.02511892; -0.17177241]	0.00597651	0	0.595208	FEM
NONHSAG051267.2	0.591087	[0.16957206; 1.01260293]	0.00598702	0	0.98618	FEM
NONHSAG040556.2	0.595318	[0.17073324; 1.01990176]	0.00599321	0	0.794273	FEM
NONHSAG019747.2	-0.598664	[-1.02563611; -0.17169217]	0.00599331	0	0.566013	FEM
NONHSAG094413.1	0.6099	[0.17483774; 1.04496320]	0.0060022	0.416183	0.100886	FEM
NONHSAG009002.3	0.595518	[0.17070131; 1.02033422]	0.00600379	0	0.772618	FEM
NONHSAG044190.2	-0.5902	[-1.01123812; -0.16916154]	0.00600563	0	0.994871	FEM
NONHSAG071129.1	0.593623	[0.17004585; 1.01720108]	0.00601716	0	0.878555	FEM
NONHSAG028379.2	0.590967	[0.16927001; 1.01266498]	0.00601895	0	0.980894	FEM
NONHSAG043672.2	0.602145	[0.17243377; 1.03185704]	0.0060234	0.116759	0.339222	FEM
NONHSAG088346.1	0.607072	[0.17362473; 1.04051918]	0.00604903	0.351238	0.148055	FEM
NONHSAG076233.1	0.597731	[0.17090273; 1.02455909]	0.00605501	0	0.5775	FEM
NONHSAG082751.1	0.611665	[0.17461795; 1.04871178]	0.00608623	0.480928	0.0611243	FEM
NONHSAG057210.1	0.61297	[0.17486989; 1.05106922]	0.00610023	0.509166	0.0467222	FEM
NONHSAG109518.1	0.608362	[0.17354657; 1.04317735]	0.00610126	0.408419	0.106197	FEM
NONHSAG076492.1	0.596254	[0.17006270; 1.02244523]	0.00610483	0	0.636967	FEM
NONHSAG072052.1	0.59261	[0.16899685; 1.01622277]	0.00610802	0	0.873244	FEM
NONHSAG065314.1	0.602148	[0.17169429; 1.03260078]	0.00611068	0.178901	0.288567	FEM
NONHSAG103802.1	0.606603	[0.17293519; 1.04027093]	0.00611415	0.36233	0.139605	FEM
NONHSAG073380.2	0.619312	[0.17649634; 1.06212781]	0.00612131	0.603607	0.0136058	FEM
NONHSAG023165.3	-0.596499	[-1.02309503; -0.16990336]	0.00613228	0	0.597079	FEM
NONHSAG085842.1	0.614126	[0.17489956; 1.05335309]	0.00613515	0.536176	0.0348388	FEM
NONHSAG019742.2	0.593541	[0.16898770; 1.01809485]	0.0061411	0	0.792146	FEM
NONHSAG108678.1	0.595358	[0.16945458; 1.02126199]	0.00614716	0	0.663281	FEM
NONHSAG062903.2	0.594974	[0.16932428; 1.02062342]	0.00614968	0	0.687385	FEM
NONHSAG079405.1	0.597963	[0.17016760; 1.02575791]	0.00615055	0	0.486251	FEM
NONHSAG089190.1	0.594666	[0.16918740; 1.02014477]	0.00615562	0	0.703526	FEM
NONHSAG088191.1	1.10516	[0.31435233; 1.89596977]	0.00616049	0.648931	0.00570272	REM
NONHSAG057068.1	0.596965	[0.16976768; 1.02416155]	0.00616447	0	0.539457	FEM
NONHSAG005284.2	-0.614324	[-1.05399200; -0.17465508]	0.00617022	0.54609	0.0309597	FEM
NONHSAG004867.2	0.610335	[0.17346824; 1.04720198]	0.00617645	0.47677	0.0634074	FEM
NONHSAG080739.1	0.588363	[0.16721358; 1.00951147]	0.00617763	0	0.992331	FEM
NONHSAG099809.1	0.601642	[0.17096415; 1.03232048]	0.00618044	0.197252	0.273386	FEM
NONHSAG002701.3	0.588347	[0.16708520; 1.00960950]	0.00619279	0	0.990153	FEM
NONHSAG015653.2	0.599357	[0.17019587; 1.02851827]	0.00619471	0.0726888	0.374063	FEM
NONHSAG021459.2	0.598944	[0.17005920; 1.02782920]	0.00619705	0.0464768	0.39424	FEM
NONHSAG096601.1	-0.594519	[-1.02024456; -0.16879321]	0.0061982	0	0.677536	FEM
NONHSAG090642.1	0.593414	[0.16845237; 1.01837643]	0.00620151	0	0.752146	FEM
NONHSAG070531.1	0.593168	[0.16835324; 1.01798341]	0.00620507	0	0.765606	FEM
NONHSAG034822.2	-0.60146	[-1.03221421; -0.17070662]	0.00620508	0.203174	0.268474	FEM
NONHSAG048787.2	0.596542	[0.16922573; 1.02385877]	0.00621535	0	0.526842	FEM
NONHSAG099240.2	-0.597224	[-1.02504809; -0.16939966]	0.0062177	0	0.481538	FEM
NONHSAG055478.2	0.614295	[0.17415573; 1.05443379]	0.00622781	0.55644	0.0271901	FEM
NONHSAG084243.1	0.599887	[0.17004600; 1.02972784]	0.00623082	0.134421	0.324979	FEM
NONHSAG083144.1	0.594231	[0.16840483; 1.02005775]	0.00623545	0	0.666953	FEM
NONHSAG069509.1	0.59973	[0.16996227; 1.02949767]	0.00623555	0.128848	0.329489	FEM
NONHSAG019031.2	0.604031	[0.17111788; 1.03694369]	0.00624313	0.329718	0.164809	FEM
NONHSAG019083.3	0.604031	[0.17111788; 1.03694369]	0.00624313	0.329718	0.164809	FEM
NONHSAG019100.2	0.594855	[0.16850320; 1.02120738]	0.00624499	0	0.615397	FEM
NONHSAG080386.1	0.588072	[0.16650549; 1.00963862]	0.00625438	0	0.982252	FEM
NONHSAG025017.2	-0.599625	[-1.02954876; -0.16970197]	0.00626341	0.142983	0.318025	FEM
NONHSAG088132.1	0.590726	[0.16716565; 1.01428563]	0.00626557	0	0.872911	FEM
NONHSAG072087.1	0.592642	[0.16765795; 1.01762519]	0.00627167	0	0.747095	FEM
NONHSAG040752.3	0.600319	[0.16972918; 1.03090960]	0.00628387	0.193575	0.276432	FEM
NONHSAG025205.3	0.599682	[0.16950903; 1.02985458]	0.00628871	0.162631	0.301961	FEM
NONHSAG026490.2	0.601335	[0.16984326; 1.03282634]	0.0063048	0.253561	0.226654	FEM
NONHSAG006163.2	0.594881	[0.16800410; 1.02175867]	0.00630682	0	0.564383	FEM
NONHSAG077358.1	-0.604168	[-1.03771906; -0.17061768]	0.00630793	0.36032	0.141126	FEM
NONHSAG056367.1	0.599105	[0.16910835; 1.02910191]	0.0063176	0.149669	0.312575	FEM
NONHSAG085754.1	0.589583	[0.16639936; 1.01276704]	0.00632023	0	0.899464	FEM
NONHSAG038663.2	0.607609	[0.17144177; 1.04377701]	0.00632565	0.457922	0.0742501	FEM
NONHSAG063315.1	0.606445	[0.17108217; 1.04180690]	0.00632937	0.431318	0.0908396	FEM
NONHSAG108929.1	-0.593665	[-1.01988589; -0.16744417]	0.00633341	0	0.625828	FEM
NONHSAG023199.2	0.594229	[0.16756531; 1.02089313]	0.00633808	0	0.583234	FEM
NONHSAG027671.3	0.597961	[0.16860022; 1.02732147]	0.0063402	0.096234	0.355582	FEM
NONHSAG089148.1	-0.585856	[-1.00653607; -0.16517545]	0.00634166	0	0.997474	FEM
NONHSAG026094.2	-0.598484	[-1.02823427; -0.16873343]	0.00634195	0.130445	0.328198	FEM
NONHSAG023272.2	0.589827	[0.16628872; 1.01336537]	0.00634245	0	0.872539	FEM
NONHSAG114683.1	0.595515	[0.16785118; 1.02317898]	0.0063475	0	0.490947	FEM
NONHSAG080737.1	0.613884	[0.17278271; 1.05498594]	0.00637686	0.576161	0.0208005	FEM
NONHSAG043614.2	-0.595082	[-1.02269116; -0.16747225]	0.00637912	0	0.495021	FEM
NONHSAG112853.1	0.594636	[0.16734095; 1.02193191]	0.00637986	0	0.523228	FEM
NONHSAG056290.1	-0.614338	[-1.05585194; -0.17282319]	0.00638727	0.583726	0.0186229	FEM
NONHSAG035432.2	0.598372	[0.16825549; 1.02848838]	0.00639664	0.161516	0.302877	FEM
NONHSAG093037.2	0.6075	[0.17075518; 1.04424415]	0.00640475	0.476381	0.0636232	FEM
NONHSAG072221.2	0.602985	[0.16945929; 1.03651028]	0.00640803	0.360868	0.140711	FEM
NONHSAG005566.2	0.596374	[0.16756797; 1.02517919]	0.00641214	0.0455529	0.394943	FEM
NONHSAG003375.2	0.600856	[0.16881992; 1.03289179]	0.00641306	0.287653	0.198611	FEM
NONHSAG112547.1	0.594251	[0.16689560; 1.02160554]	0.00642155	0	0.516607	FEM
NONHSAG023297.2	0.597957	[0.16790844; 1.02800611]	0.00642502	0.157147	0.306459	FEM
NONHSAG040873.2	0.597795	[0.16782554; 1.02776514]	0.00642964	0.150982	0.311502	FEM
NONHSAG070276.1	0.596768	[0.16752672; 1.02600875]	0.00643092	0.0886811	0.361545	FEM
NONHSAG018371.2	0.590094	[0.16564575; 1.01454229]	0.00643186	0	0.791892	FEM
NONHSAG076272.1	0.599474	[0.16820608; 1.03074222]	0.00644082	0.242841	0.235536	FEM
NONHSAG041692.2	-0.594939	[-1.02295884; -0.16691853]	0.00644268	0	0.457534	FEM
NONHSAG062822.1	0.595342	[0.16696289; 1.02372023]	0.0064512	0.00260557	0.426978	FEM
NONHSAG064628.1	0.594898	[0.16661311; 1.02318281]	0.00647926	0	0.434538	FEM
NONHSAG031169.2	0.585653	[0.16399223; 1.00731344]	0.00648326	0	0.976885	FEM
NONHSAG047407.2	0.586091	[0.16400526; 1.00817730]	0.00649716	0	0.960142	FEM
NONHSAG050819.3	-0.596773	[-1.02658416; -0.16696132]	0.00650126	0.140044	0.320415	FEM
NONHSAG093865.1	0.590003	[0.16505862; 1.01494641]	0.00650234	0	0.743554	FEM
NONHSAG090032.1	0.600224	[0.16790587; 1.03254311]	0.00650388	0.304662	0.184806	FEM
NONHSAG093927.2	0.590109	[0.16506658; 1.01515142]	0.00650509	0	0.733678	FEM
NONHSAG010047.3	-0.592038	[-1.01848715; -0.16558834]	0.00650732	0	0.59755	FEM
NONHSAG064546.1	0.593299	[0.16589685; 1.02070035]	0.00651285	0	0.509499	FEM
NONHSAG071984.1	-0.591516	[-1.01764920; -0.16538208]	0.00651489	0	0.628091	FEM
NONHSAG049715.2	0.595193	[0.16634791; 1.02403818]	0.00652269	0.0534728	0.388898	FEM
NONHSAG016085.3	0.597499	[0.16697683; 1.02802111]	0.00652463	0.194983	0.275266	FEM
NONHSAG106132.1	-0.597664	[-1.02836079; -0.16696681]	0.00653162	0.207615	0.264788	FEM
NONHSAG031069.2	0.586626	[0.16383260; 1.00942021]	0.00653807	0	0.920212	FEM
NONHSAG079445.1	0.591313	[0.16511389; 1.01751208]	0.00654155	0	0.620655	FEM
NONHSAG066734.1	0.590102	[0.16477221; 1.01543250]	0.00654201	0	0.705029	FEM
NONHSAG063257.1	0.596993	[0.16658554; 1.02740012]	0.00655585	0.187552	0.281418	FEM
NONHSAG012478.2	0.591667	[0.16503382; 1.01829934]	0.00656413	0	0.578873	FEM
NONHSAG008427.2	0.599805	[0.16728369; 1.03232678]	0.00656665	0.31618	0.175557	FEM
NONHSAG077040.2	-0.59523	[-1.02447960; -0.16598057]	0.00657006	0.0957655	0.355953	FEM
NONHSAG110537.1	0.611906	[0.17053128; 1.05328001]	0.00658221	0.582528	0.0189578	FEM
NONHSAG068863.1	0.590486	[0.16455642; 1.01641654]	0.00658292	0	0.645575	FEM
NONHSAG040140.2	0.613553	[0.17087933; 1.05622573]	0.00659576	0.604404	0.0134254	FEM
NONHSAG060125.1	0.59317	[0.16510636; 1.02123314]	0.00660794	0	0.449165	FEM
NONHSAG087490.1	0.590404	[0.16433584; 1.01647154]	0.00660802	0	0.630962	FEM
NONHSAG096534.1	-0.595381	[-1.02509807; -0.16566368]	0.00661528	0.135618	0.324008	FEM
NONHSAG006588.2	-0.598889	[-1.03115354; -0.16662472]	0.00661718	0.303793	0.185507	FEM
NONHSAG067368.2	0.5868	[0.16325700; 1.01034348]	0.00661773	0	0.864319	FEM
NONHSAG018890.2	0.58705	[0.16331780; 1.01078270]	0.00661885	0	0.849293	FEM
NONHSAG014934.2	0.599624	[0.16679351; 1.03245398]	0.00662164	0.332454	0.162655	FEM
NONHSAG060674.1	-0.594671	[-1.02399689; -0.16534544]	0.00663055	0.102849	0.350333	FEM
NONHSAG107935.1	0.597203	[0.16598593; 1.02841976]	0.00663855	0.244101	0.234491	FEM
NONHSAG023340.2	0.593709	[0.16501076; 1.02240733]	0.00663907	0.0429024	0.396957	FEM
NONHSAG016355.2	0.591541	[0.16438312; 1.01869845]	0.00664226	0	0.527094	FEM
NONHSAG043184.2	0.592495	[0.16464583; 1.02034345]	0.00664256	0	0.466228	FEM
NONHSAG002651.3	0.591324	[0.16431319; 1.01833429]	0.00664349	0	0.540969	FEM
NONHSAG069213.1	0.599784	[0.16662392; 1.03294475]	0.00664855	0.348407	0.150233	FEM
NONHSAG085698.1	0.588019	[0.16335495; 1.01268335]	0.00664861	0	0.765434	FEM
NONHSAG087520.1	0.611446	[0.16984563; 1.05304730]	0.00665078	0.586901	0.0177537	FEM
NONHSAG042754.2	0.584532	[0.16234272; 1.00672162]	0.00665423	0	0.952488	FEM
NONHSAG036297.2	0.600454	[0.16675679; 1.03415204]	0.00665524	0.37223	0.132184	FEM
NONHSAG110495.1	0.585829	[0.16268405; 1.00897299]	0.00665664	0	0.894146	FEM
NONHSAG090547.1	0.593384	[0.16472165; 1.02204603]	0.00666434	0.0399809	0.399171	FEM
NONHSAG097492.2	0.588961	[0.16348332; 1.01443929]	0.00666571	0	0.686906	FEM
NONHSAG002362.2	0.593122	[0.16462489; 1.02161851]	0.0066674	0.0229029	0.411999	FEM
NONHSAG040441.3	0.58679	[0.16286367; 1.01071566]	0.00666788	0	0.831578	FEM
NONHSAG047952.2	-0.592201	[-1.02016107; -0.16424175]	0.0066837	0	0.455029	FEM
NONHSAG105666.1	0.587739	[0.16295584; 1.01252294]	0.00668994	0	0.752905	FEM
NONHSAG108282.1	0.591208	[0.16387805; 1.01853728]	0.00669499	0	0.509371	FEM
NONHSAG009328.2	-0.587508	[-1.01235443; -0.16266218]	0.00671957	0	0.745748	FEM
NONHSAG004095.2	0.584307	[0.16172435; 1.00689007]	0.00672628	0	0.929727	FEM
NONHSAG027446.2	0.590111	[0.16330484; 1.01691619]	0.00672959	0	0.55719	FEM
NONHSAG035025.2	0.586799	[0.16232782; 1.01126925]	0.00673743	0	0.78061	FEM
NONHSAG025597.2	0.602704	[0.16665757; 1.03874994]	0.00674629	0.458629	0.0738289	FEM
NONHSAG051355.2	0.588686	[0.16277961; 1.01459325]	0.00674654	0	0.641931	FEM
NONHSAG036467.3	0.592338	[0.16370260; 1.02097317]	0.00675769	0.0409174	0.398462	FEM
NONHSAG103310.1	0.587708	[0.16236445; 1.01305120]	0.00676529	0	0.69671	FEM
NONHSAG078531.2	-0.583433	[-1.00568623; -0.16117921]	0.00676583	0	0.947661	FEM
NONHSAG037797.2	0.599707	[0.16560551; 1.03380801]	0.00677469	0.39058	0.118767	FEM
NONHSAG073723.1	1.22822	[0.33915035; 2.11729948]	0.00677573	0.705775	0.00123965	REM
NONHSAG054156.2	0.590294	[0.16293899; 1.01764896]	0.00678339	0	0.505372	FEM
NONHSAG055259.2	-0.597938	[-1.03086127; -0.16501404]	0.00678784	0.339722	0.156966	FEM
NONHSAG049491.2	0.593772	[0.16379878; 1.02374448]	0.00679628	0.161282	0.303069	FEM
NONHSAG059982.1	-0.585664	[-1.00981971; -0.16150809]	0.00680335	0	0.807257	FEM
NONHSAG015387.2	-0.581275	[-1.00228896; -0.16026113]	0.00680818	0	0.990885	FEM
NONHSAG052290.2	0.585994	[0.16146987; 1.01051885]	0.00682026	0	0.773194	FEM
NONHSAG108291.1	0.585254	[0.16124647; 1.00926123]	0.0068228	0	0.819774	FEM
NONHSAG072921.1	0.587339	[0.16167844; 1.01299960]	0.00684143	0	0.663103	FEM
NONHSAG031636.3	0.589488	[0.16220039; 1.01677563]	0.00685051	0	0.509395	FEM
NONHSAG103432.1	-0.586357	[-1.01138360; -0.16133135]	0.00685151	0	0.724325	FEM
NONHSAG004902.2	-0.591516	[-1.02029005; -0.16274096]	0.00685276	0.0578077	0.385571	FEM
NONHSAG051744.2	0.582665	[0.16029106; 1.00503823]	0.00685471	0	0.939319	FEM
NONHSAG028795.2	-0.595371	[-1.02708135; -0.16365995]	0.00687108	0.278396	0.206184	FEM
NONHSAG112976.1	0.582541	[0.16011147; 1.00496969]	0.00687394	0	0.936083	FEM
NONHSAG093774.1	0.579079	[0.15913279; 0.99902597]	0.00687759	0	0.999854	FEM
NONHSAG113377.1	0.590897	[0.16234305; 1.01945025]	0.00688244	0.0364803	0.401817	FEM
NONHSAG030326.2	0.594881	[0.16340557; 1.02635648]	0.00688661	0.265043	0.217167	FEM
NONHSAG045682.2	-0.580734	[-1.00204454; -0.15942426]	0.0068993	0	0.983178	FEM
NONHSAG109540.1	0.592228	[0.16257796; 1.02187792]	0.0068995	0.138286	0.321843	FEM
NONHSAG085472.1	0.599459	[0.16454551; 1.03437280]	0.00690176	0.422816	0.0964322	FEM
NONHSAG028747.2	0.599898	[0.16462312; 1.03517228]	0.00690727	0.43551	0.0881319	FEM
NONHSAG053680.2	0.589834	[0.16186068; 1.01780742]	0.00690737	0	0.448004	FEM
NONHSAG093787.1	-0.590848	[-1.01961610; -0.16208059]	0.00691502	0.0596573	0.384149	FEM
NONHSAG099341.1	0.590226	[0.16183599; 1.01861663]	0.00692472	0.0207293	0.413617	FEM
NONHSAG042755.2	0.587174	[0.16097395; 1.01337418]	0.00692804	0	0.60847	FEM
NONHSAG090351.1	0.589807	[0.16166134; 1.01795236]	0.00693256	0	0.432997	FEM
NONHSAG065488.1	0.582621	[0.15961800; 1.00562327]	0.00694236	0	0.897063	FEM
NONHSAG103281.1	0.603354	[0.16527862; 1.04142983]	0.00694489	0.516603	0.0432608	FEM
NONHSAG048570.2	0.587955	[0.16105935; 1.01485006]	0.006945	0	0.542198	FEM
NONHSAG001247.3	-0.583109	[-1.00652924; -0.15968860]	0.00695077	0	0.865467	FEM
NONHSAG024264.3	0.589086	[0.16130145; 1.01686998]	0.00695393	0	0.46286	FEM
NONHSAG104836.1	0.598988	[0.16400720; 1.03396798]	0.00695464	0.426013	0.0943136	FEM
NONHSAG055409.3	0.588023	[0.16084844; 1.01519854]	0.00697536	0	0.51579	FEM
NONHSAG003406.2	0.586663	[0.16043999; 1.01288511]	0.00698016	0	0.604535	FEM
NONHSAG078151.1	0.586674	[0.16044212; 1.01290674]	0.00698031	0	0.602464	FEM
NONHSAG027244.2	0.583373	[0.15943685; 1.00730986]	0.006994	0	0.820754	FEM
NONHSAG109777.1	-0.584635	[-1.00954853; -0.15972130]	0.00700205	0	0.730569	FEM
NONHSAG079076.1	0.591831	[0.16162633; 1.02203530]	0.00701008	0.184105	0.284269	FEM
NONHSAG059375.1	0.587565	[0.16027418; 1.01485503]	0.00703496	0	0.503505	FEM
NONHSAG025680.2	0.590715	[0.16112500; 1.02030526]	0.0070361	0.13694	0.322936	FEM
NONHSAG033052.2	0.580846	[0.15841804; 1.00327474]	0.00703814	0	0.933204	FEM
NONHSAG013955.2	-0.583587	[-1.00803896; -0.15913516]	0.00704221	0	0.772493	FEM
NONHSAG065742.1	0.605606	[0.16513312; 1.04607967]	0.00704303	0.569082	0.0229751	FEM
NONHSAG067130.2	0.581628	[0.15851321; 1.00474243]	0.00705402	0	0.88664	FEM
NONHSAG056775.1	0.588397	[0.16027773; 1.01651605]	0.00706472	0	0.43118	FEM
NONHSAG034907.2	0.583818	[0.15898770; 1.00864906]	0.00707049	0	0.736147	FEM
NONHSAG023674.2	0.589433	[0.16050433; 1.01836209]	0.00707214	0.079695	0.368598	FEM
NONHSAG073804.1	0.5833	[0.15880443; 1.00779611]	0.00707616	0	0.768201	FEM
NONHSAG034303.3	0.579675	[0.15775866; 1.00159063]	0.00708412	0	0.959217	FEM
NONHSAG110540.1	-0.584654	[-1.01023047; -0.15907754]	0.00708899	0	0.663722	FEM
NONHSAG015040.2	-0.598581	[-1.03431245; -0.16285026]	0.0070912	0.452579	0.0774652	FEM
NONHSAG050940.3	0.588001	[0.15989502; 1.01610784]	0.00710148	0	0.431803	FEM
NONHSAG017002.2	0.587632	[0.15968332; 1.01558139]	0.00711641	0	0.444234	FEM
NONHSAG068767.1	0.603553	[0.16398381; 1.04312241]	0.00711978	0.551498	0.0289543	FEM
NONHSAG056912.1	-0.591768	[-1.02277175; -0.16076337]	0.00712223	0.241066	0.237008	FEM
NONHSAG071441.1	0.58456	[0.15880175; 1.01031794]	0.0071227	0	0.645124	FEM
NONHSAG074853.1	0.597343	[0.16224028; 1.03244484]	0.0071272	0.43235	0.0901699	FEM
NONHSAG002975.2	0.588524	[0.15983483; 1.01721314]	0.00712858	0.0584339	0.38509	FEM
NONHSAG109457.1	0.585854	[0.15909837; 1.01260895]	0.00713009	0	0.54973	FEM
NONHSAG066022.1	0.580576	[0.15752986; 1.00362288]	0.00714851	0	0.889795	FEM
NONHSAG043256.2	0.582665	[0.15809644; 1.00723449]	0.00714855	0	0.759082	FEM
NONHSAG106508.1	0.582404	[0.15799051; 1.00681751]	0.0071533	0	0.772989	FEM
NONHSAG012635.2	-0.578265	[-0.99969803; -0.15683186]	0.0071582	0	0.977255	FEM
NONHSAG106029.1	-0.590106	[-1.02018513; -0.16002600]	0.00716051	0.178579	0.288833	FEM
NONHSAG075803.1	-0.590937	[-1.02163513; -0.16023963]	0.00716211	0.224418	0.250832	FEM
NONHSAG002943.3	0.586856	[0.15909552; 1.01461554]	0.00716714	0	0.458912	FEM
NONHSAG074544.2	0.598033	[0.16203617; 1.03402914]	0.00717899	0.461948	0.0718679	FEM
NONHSAG002437.2	0.584643	[0.15835036; 1.01093468]	0.00718683	0	0.591656	FEM
NONHSAG093736.1	0.590186	[0.15980937; 1.02056285]	0.00719254	0.200775	0.270464	FEM
NONHSAG111834.1	0.58169	[0.15748944; 1.00589092]	0.00719519	0	0.792025	FEM
NONHSAG097799.2	-0.591164	[-1.02229502; -0.16003211]	0.00719817	0.250556	0.229141	FEM
NONHSAG025668.3	0.592391	[0.16031212; 1.02447011]	0.00720518	0.304636	0.184827	FEM
NONHSAG023376.3	0.583046	[0.15772846; 1.00836318]	0.00721264	0	0.685252	FEM
NONHSAG034933.2	0.58039	[0.15700226; 1.00377809]	0.0072137	0	0.861699	FEM
NONHSAG107332.1	0.587726	[0.15893871; 1.01651285]	0.00722019	0.0707309	0.375585	FEM
NONHSAG004034.3	-0.588422	[-1.01778576; -0.15905793]	0.00722953	0.123679	0.333659	FEM
NONHSAG046155.2	0.57573	[0.15559917; 0.99586111]	0.00723341	0	0.999082	FEM
NONHSAG046500.2	0.57573	[0.15559917; 0.99586111]	0.00723341	0	0.999082	FEM
NONHSAG055071.3	0.596793	[0.16128712; 1.03229884]	0.00723402	0.446965	0.0809082	FEM
NONHSAG112716.1	0.576504	[0.15570382; 0.99730405]	0.00724786	0	0.99233	FEM
NONHSAG073445.1	0.580674	[0.15682183; 1.00452562]	0.00724898	0	0.821484	FEM
NONHSAG109043.1	-0.583442	[-1.00931850; -0.15756452]	0.00724964	0	0.62975	FEM
NONHSAG007120.2	0.600958	[0.16226690; 1.03964923]	0.00725337	0.533504	0.035929	FEM
NONHSAG107686.1	0.580452	[0.15671528; 1.00418929]	0.00725541	0	0.831078	FEM
NONHSAG065692.1	-0.583422	[-1.00933264; -0.15751040]	0.0072563	0	0.626159	FEM
NONHSAG014722.3	-0.591822	[-1.02390126; -0.15974203]	0.00726119	0.306093	0.183652	FEM
NONHSAG106936.1	0.590049	[0.15925562; 1.02084178]	0.00726225	0.230483	0.245794	FEM
NONHSAG027432.3	-0.583631	[-1.00978398; -0.15747720]	0.00726857	0	0.602537	FEM
NONHSAG037936.2	0.583126	[0.15727758; 1.00897503]	0.00727729	0	0.631606	FEM
NONHSAG111181.1	0.589254	[0.15875011; 1.01975867]	0.00730179	0.212051	0.261105	FEM
NONHSAG025830.2	-1.31628	[-2.27811325; -0.35445500]	0.00731173	0.740704	0.000333812	REM
NONHSAG086099.1	0.577989	[0.15562825; 1.00034929]	0.00731384	0	0.932134	FEM
NONHSAG090515.1	0.582942	[0.15683783; 1.00904551]	0.00733093	0	0.605394	FEM
NONHSAG107146.1	-0.583714	[-1.01039095; -0.15703664]	0.00733215	0	0.551052	FEM
NONHSAG055251.2	0.586402	[0.15766049; 1.01514429]	0.0073458	0.070287	0.37593	FEM
NONHSAG049989.3	0.582288	[0.15654938; 1.00802638]	0.00734647	0	0.640281	FEM
NONHSAG075908.1	0.587688	[0.15794552; 1.01742987]	0.00735409	0.157707	0.306	FEM
NONHSAG076561.2	0.581861	[0.15635821; 1.00736321]	0.00735703	0	0.662662	FEM
NONHSAG006394.2	0.586412	[0.15752691; 1.01529680]	0.00736449	0.0845014	0.364831	FEM
NONHSAG097363.1	0.596546	[0.16021291; 1.03287945]	0.00736941	0.473832	0.065045	FEM
NONHSAG022376.2	0.576737	[0.15489162; 0.99858281]	0.00736958	0	0.958372	FEM
NONHSAG113234.1	0.576645	[0.15481898; 0.99847104]	0.00737628	0	0.95932	FEM
NONHSAG007207.2	0.585583	[0.15717196; 1.01399336]	0.00738271	0.0383594	0.400397	FEM
NONHSAG056540.1	0.579581	[0.15547522; 1.00368617]	0.00739467	0	0.794837	FEM
NONHSAG053479.2	0.583186	[0.15642352; 1.00994947]	0.0073973	0	0.540889	FEM
NONHSAG109748.1	0.578115	[0.15506125; 1.00116852]	0.00739757	0	0.883469	FEM
NONHSAG112972.1	0.592456	[0.15889738; 1.02601519]	0.007399	0.377017	0.12864	FEM
NONHSAG044652.3	0.591376	[0.15860633; 1.02414474]	0.00739917	0.342807	0.154566	FEM
NONHSAG017683.2	0.576906	[0.15472492; 0.99908625]	0.00739925	0	0.940903	FEM
NONHSAG068781.1	0.585323	[0.15678038; 1.01386471]	0.00742718	0.0533	0.38903	FEM
NONHSAG056316.1	-0.577269	[-0.99997937; -0.15455886]	0.00743622	0	0.907345	FEM
NONHSAG058130.2	-0.594645	[-1.03008479; -0.15920588]	0.00743695	0.447148	0.0807949	FEM
NONHSAG062257.1	0.5817	[0.15573758; 1.00766213]	0.00743728	0	0.615423	FEM
NONHSAG050528.2	0.582555	[0.15595411; 1.00915679]	0.00743903	0	0.554946	FEM
NONHSAG085721.1	-0.595103	[-1.03095694; -0.15924888]	0.00744779	0.460239	0.0728749	FEM
NONHSAG038592.3	-0.596587	[-1.03353869; -0.15963575]	0.0074492	0.491944	0.0552734	FEM
NONHSAG021791.2	0.577495	[0.15446716; 1.00052268]	0.00745762	0	0.884028	FEM
NONHSAG038148.2	0.589916	[0.15778826; 1.02204376]	0.00745779	0.311526	0.179283	FEM
NONHSAG087617.1	0.575111	[0.15363864; 0.99658403]	0.00748463	0	0.972191	FEM
NONHSAG069473.1	0.579296	[0.15474047; 1.00385197]	0.00748691	0	0.75058	FEM
NONHSAG011088.2	0.594576	[0.15873756; 1.03041379]	0.00749847	0.460109	0.0729515	FEM
NONHSAG103464.2	0.581388	[0.15517485; 1.00760151]	0.00750435	0	0.588641	FEM
NONHSAG115208.1	0.578572	[0.15442242; 1.00272141]	0.00750446	0	0.788183	FEM
NONHSAG099962.1	0.574492	[0.15328664; 0.99569637]	0.0075111	0	0.981165	FEM
NONHSAG090918.2	-0.578195	[-1.00213298; -0.15425606]	0.00751373	0	0.806779	FEM
NONHSAG020941.2	0.579665	[0.15460356; 1.00472680]	0.00752005	0	0.701028	FEM
NONHSAG046999.2	-0.575943	[-0.99836212; -0.15352398]	0.00753238	0	0.924695	FEM
NONHSAG077466.1	0.586572	[0.15627970; 1.01686504]	0.00754321	0.202722	0.268849	FEM
NONHSAG078664.1	0.580894	[0.15466441; 1.00712450]	0.00755767	0	0.58677	FEM
NONHSAG056027.2	0.578386	[0.15397210; 1.00280026]	0.00756114	0	0.761921	FEM
NONHSAG083828.1	0.585945	[0.15597421; 1.01591561]	0.00756255	0.18014	0.287545	FEM
NONHSAG075343.1	0.59884	[0.15938824; 1.03829105]	0.00756508	0.552217	0.0286935	FEM
NONHSAG000787.2	-0.5724	[-0.99247578; -0.15232451]	0.00756888	0	0.998892	FEM
NONHSAG032707.2	0.571893	[0.15213942; 0.99164657]	0.00757608	0	0.99983	FEM
NONHSAG071245.1	-0.583645	[-1.01204673; -0.15524373]	0.00757919	0.0440319	0.396099	FEM
NONHSAG016076.3	-0.573917	[-0.99530883; -0.15252607]	0.00759783	0	0.974119	FEM
NONHSAG067878.1	0.582841	[0.15488960; 1.01079337]	0.00759898	0	0.431833	FEM
NONHSAG080590.1	0.581267	[0.15442156; 1.00811305]	0.00760601	0	0.527791	FEM
NONHSAG108632.1	0.573241	[0.15204910; 0.99443248]	0.00764054	0	0.980403	FEM
NONHSAG011276.3	-0.589722	[-1.02309492; -0.15634869]	0.00765061	0.372527	0.131963	FEM
NONHSAG014332.2	-0.576982	[-1.00101636; -0.15294725]	0.00765402	0	0.794332	FEM
NONHSAG108374.1	-0.578861	[-1.00428421; -0.15343765]	0.00765512	0	0.66129	FEM
NONHSAG090872.1	0.578115	[0.15323011; 1.00299946]	0.00765652	0	0.714047	FEM
NONHSAG062206.1	0.599236	[0.15881571; 1.03965694]	0.00765827	0.571975	0.0220703	FEM
NONHSAG007316.2	-0.581152	[-1.00830662; -0.15399830]	0.00766177	0	0.497828	FEM
NONHSAG021560.2	0.589569	[0.15615839; 1.02297975]	0.00767162	0.374484	0.130512	FEM
NONHSAG053576.2	0.583096	[0.15438081; 1.01181037]	0.00768056	0.0775942	0.370239	FEM
NONHSAG075743.1	0.576601	[0.15259734; 1.00060554]	0.00768977	0	0.79651	FEM
NONHSAG060729.1	0.57986	[0.15345196; 1.00626728]	0.00769087	0	0.565906	FEM
NONHSAG000092.2	0.583917	[0.15451540; 1.01331924]	0.00769234	0.138654	0.321545	FEM
NONHSAG113691.1	-0.591181	[-1.02595379; -0.15640776]	0.0076965	0.427198	0.0935327	FEM
[truncated: 4,253 more rows]
