# Supplementary material for: Integrating the Ribonucleic Acid Sequencing Data From Various Studies for Exploring the Multiple Sclerosis-Related Long Noncoding Ribonucleic Acids and Their Functions
Source: Front Genet. 2019 Nov 12;10:1136. doi: 10.3389/fgene.2019.01136 (PMC6861379; doi:10.3389/fgene.2019.01136)
Supplement: Supplementary file 4 [file Table_4.xlsx]

## Sheet: Sheet1
Table S4 The significantly differentially expressed protein-coding genes between MS and control
Gene ID	Meta-analysis			Heterogeneity test		Model
	SMD	95% CI	P value	I2	Qp
ENSG00000204389.8	0.947349	[0.53246652; 1.36223201]	7.62354e-06	0.668728	1.00639e-05	REM
ENSG00000196126.6	0.846701	[0.47005756; 1.22334413]	1.05241e-05	0.59762	0.000332288	REM
ENSG00000198502.5	0.82242	[0.44641724; 1.19842222]	1.81059e-05	0.595859	0.000355614	REM
ENSG00000204287.9	0.768565	[0.37706095; 1.16006999]	0.000119236	0.631912	7.54537e-05	REM
ENSG00000258388.3	0.649402	[0.31356426; 0.98523957]	0.000150642	0.50201	0.00567359	REM
ENSG00000174021.6	0.650852	[0.31225022; 0.98945361]	0.000164914	0.523179	0.00342677	REM
ENSG00000244731.3	0.68281	[0.31729296; 1.04832653]	0.00025083	0.579069	0.000655554	REM
ENSG00000227357.2	-0.632888	[-0.98407356; -0.28170278]	0.000412101	0.553164	0.00150651	REM
ENSG00000231021.4	-0.632888	[-0.98407356; -0.28170278]	0.000412101	0.553164	0.00150651	REM
ENSG00000180739.12	-0.615085	[-0.97154360; -0.25862717]	0.000719413	0.564947	0.00104793	REM
ENSG00000267816.1	-0.638603	[-1.01028585; -0.26691948]	0.000758396	0.594676	0.000372038	REM
ENSG00000026751.12	0.576184	[0.23586803; 0.91650054]	0.000905198	0.524679	0.00329913	REM
ENSG00000125735.6	0.635446	[0.25857271; 1.01231875]	0.000950589	0.606607	0.000232305	REM
ENSG00000227322.7	0.600472	[0.24105145; 0.95989250]	0.00105846	0.566166	0.00100786	REM
ENSG00000177426.16	0.657672	[0.26318258; 1.05216046]	0.0010846	0.639398	5.21305e-05	REM
ENSG00000224552.5	0.675635	[0.26866838; 1.08260184]	0.00113817	0.662291	1.48692e-05	REM
ENSG00000122483.13	0.618307	[0.24251094; 0.99410361]	0.00126044	0.602242	0.000277103	REM
ENSG00000234745.5	0.541775	[0.20493223; 0.87861807]	0.00161908	0.510989	0.00461321	REM
ENSG00000204304.7	0.663666	[0.25065241; 1.07668053]	0.00163552	0.677513	5.73361e-06	REM
ENSG00000107957.12	-0.595122	[-0.96917189; -0.22107213]	0.00181833	0.600177	0.000300719	REM
ENSG00000143545.4	0.580518	[0.21160297; 0.94943221]	0.00204085	0.60059	0.000295864	REM
ENSG00000182718.12	0.526807	[0.18533398; 0.86827942]	0.00249631	0.53424	0.00257092	REM
ENSG00000221988.8	0.580841	[0.20232208; 0.95935995]	0.00263286	0.613063	0.000177364	REM
ENSG00000165030.3	0.534893	[0.18552849; 0.88425651]	0.00269226	0.549063	0.00169975	REM
ENSG00000106211.8	0.546552	[0.18592393; 0.90717991]	0.00297325	0.58132	0.00060607	REM
ENSG00000113319.7	-0.526188	[-0.87401288; -0.17836365]	0.00302601	0.550758	0.00161758	REM
ENSG00000157734.9	-0.630845	[-1.04889366; -0.21279601]	0.00309961	0.682941	3.97598e-06	REM
ENSG00000163467.7	0.527408	[0.17528129; 0.87953571]	0.00332854	0.552039	0.00155766	REM
ENSG00000084453.12	-0.511462	[-0.85491001; -0.16801495]	0.00351343	0.536238	0.00243627	REM
ENSG00000137767.9	0.493558	[0.15673082; 0.83038585]	0.00407861	0.516145	0.00407779	REM
ENSG00000064393.11	-0.497908	[-0.83873393; -0.15708107]	0.00419213	0.517462	0.00394912	REM
ENSG00000175764.10	-0.490621	[-0.82765031; -0.15359269]	0.00432783	0.517665	0.0039295	REM
ENSG00000198648.6	-0.580478	[-0.98132587; -0.17963054]	0.00453505	0.66306	1.42051e-05	REM
ENSG00000140332.11	0.490611	[0.15059725; 0.83062519]	0.00468232	0.529664	0.00290162	REM
ENSG00000257093.2	-0.489732	[-0.83020313; -0.14926185]	0.00481343	0.531366	0.00277489	REM
ENSG00000262599.1	-0.489732	[-0.83020313; -0.14926185]	0.00481343	0.531366	0.00277489	REM
ENSG00000144815.10	-0.519607	[-0.88168642; -0.15752838]	0.00491229	0.584577	0.00054001	REM
ENSG00000185262.7	0.479457	[0.14376571; 0.81514868]	0.0051197	0.516545	0.00403836	REM
ENSG00000142867.8	0.547917	[0.15932093; 0.93651248]	0.00571705	0.636055	6.16301e-05	REM
ENSG00000204767.3	-0.522837	[-0.89503530; -0.15063963]	0.00590031	0.607837	0.000220848	REM
ENSG00000126768.8	-0.573523	[-0.98313246; -0.16391325]	0.00606342	0.666378	1.16291e-05	REM
ENSG00000077150.13	0.462769	[0.12764175; 0.79789634]	0.00679933	0.502957	0.0055537	REM
ENSG00000135046.9	0.566905	[0.15635755; 0.97745149]	0.00680028	0.676574	6.09967e-06	REM
ENSG00000204305.9	0.501542	[0.13825333; 0.86483063]	0.00681198	0.582079	0.000590118	REM
ENSG00000163840.5	0.462104	[0.12450651; 0.79970159]	0.00729975	0.514584	0.00423444	REM
ENSG00000177432.6	-0.459952	[-0.79679372; -0.12310985]	0.00744298	0.521898	0.00353883	REM
ENSG00000145386.5	0.501924	[0.13187141; 0.87197638]	0.0078498	0.598224	0.00032459	REM
ENSG00000102265.7	0.453108	[0.11869883; 0.78751691]	0.0079143	0.515632	0.00412874	REM
ENSG00000086717.14	-0.456195	[-0.79308358; -0.11930636]	0.0079516	0.530242	0.00285809	REM
ENSG00000099219.9	-0.446827	[-0.77729934; -0.11635564]	0.00804691	0.505861	0.00519817	REM
ENSG00000134531.5	0.44829	[0.11660245; 0.77997698]	0.00807244	0.505502	0.00524111	REM
ENSG00000140009.14	0.455674	[0.11689038; 0.79445683]	0.00838258	0.52216	0.00351565	REM
ENSG00000026025.9	0.505466	[0.12869144; 0.88224110]	0.00855209	0.616783	0.000151053	REM
ENSG00000196954.8	0.455237	[0.11426078; 0.79621273]	0.00887598	0.52425	0.00333529	REM
ENSG00000136960.8	-0.527183	[-0.92255833; -0.13180786]	0.00896428	0.657956	1.91499e-05	REM
ENSG00000173926.5	0.447365	[0.11100093; 0.78372987]	0.00913917	0.513496	0.00434647	REM
ENSG00000009694.9	-0.511271	[-0.89596391; -0.12657835]	0.00918975	0.640758	4.8645e-05	REM
ENSG00000065675.10	-0.446693	[-0.78414965; -0.10923631]	0.00947393	0.524527	0.00331187	REM
ENSG00000161381.9	-0.503695	[-0.88426519; -0.12312456]	0.00948356	0.630117	8.22292e-05	REM
ENSG00000147872.5	0.453798	[0.10772029; 0.79987535]	0.0101678	0.543913	0.00197023	REM
ENSG00000183230.12	-0.5227	[-0.92163022; -0.12376937]	0.0102259	0.66039	1.66296e-05	REM
ENSG00000121931.11	0.483119	[0.11368587; 0.85255300]	0.0103727	0.595645	0.000358533	REM
ENSG00000157985.13	-0.430785	[-0.76111486; -0.10045558]	0.0105868	0.504258	0.00539224	REM
ENSG00000213420.3	-0.439811	[-0.77836053; -0.10126139]	0.0108889	0.529564	0.00290915	REM
ENSG00000149527.13	-0.447897	[-0.79307012; -0.10272385]	0.0109812	0.546849	0.0018121	REM
ENSG00000135049.11	-0.440147	[-0.77970161; -0.10059195]	0.0110649	0.531027	0.00279974	REM
ENSG00000170889.9	-0.433051	[-0.76720691; -0.09889450]	0.0110831	0.51161	0.00454593	REM
ENSG00000180198.11	0.455363	[0.10347087; 0.80725582]	0.0112024	0.557427	0.00132484	REM
ENSG00000150347.10	0.434143	[0.09800818; 0.77027874]	0.0113581	0.51954	0.00375255	REM
ENSG00000239998.1	0.429974	[0.09692492; 0.76302342]	0.0113931	0.503222	0.00552052	REM
ENSG00000168439.12	0.549658	[0.12307918; 0.97623763]	0.011553	0.703628	8.51628e-07	REM
ENSG00000153071.10	0.471039	[0.10503785; 0.83703942]	0.0116525	0.594959	0.000368055	REM
ENSG00000167553.10	0.511268	[0.11375965; 0.90877570]	0.011705	0.665452	1.23033e-05	REM
ENSG00000134490.9	-0.458605	[-0.81597437; -0.10123608]	0.0118954	0.578214	0.000675189	REM
ENSG00000100591.3	0.492511	[0.10627361; 0.87874888]	0.012444	0.639287	5.24257e-05	REM
ENSG00000151929.5	0.509279	[0.10860885; 0.90994865]	0.0127279	0.656834	2.04202e-05	REM
ENSG00000137752.18	0.510854	[0.10783945; 0.91386819]	0.0129748	0.659223	1.77989e-05	REM
ENSG00000101265.11	-0.474029	[-0.84895592; -0.09910195]	0.0132094	0.614192	0.000168996	REM
ENSG00000189362.7	-0.44805	[-0.80714263; -0.08895771]	0.0144632	0.588466	0.000469105	REM
ENSG00000263054.1	-0.434107	[-0.78236444; -0.08584988]	0.0145591	0.555926	0.00138667	REM
ENSG00000270985.1	-0.434107	[-0.78236444; -0.08584988]	0.0145591	0.555926	0.00138667	REM
ENSG00000160392.9	-0.440357	[-0.79382061; -0.08689298]	0.0146129	0.560706	0.00119758	REM
ENSG00000128272.10	0.419615	[0.08131139; 0.75791845]	0.0150536	0.528725	0.00297344	REM
ENSG00000185955.4	0.453752	[0.08743519; 0.82006896]	0.0151896	0.589415	0.000453019	REM
ENSG00000172578.7	0.458851	[0.08652915; 0.83117340]	0.0157131	0.610512	0.00019758	REM
ENSG00000196187.7	-0.439932	[-0.79763024; -0.08223320]	0.0159265	0.575078	0.000751459	REM
ENSG00000124766.4	-0.460524	[-0.83610204; -0.08494625]	0.0162477	0.616164	0.000155184	REM
ENSG00000076706.10	-0.429999	[-0.78090104; -0.07909725]	0.0163144	0.559259	0.00125245	REM
ENSG00000142227.6	0.480822	[0.08772558; 0.87391847]	0.0165117	0.6512	2.79857e-05	REM
ENSG00000206394.4	0.421732	[0.07676474; 0.76669928]	0.0165681	0.547869	0.00175962	REM
ENSG00000129932.3	-0.439094	[-0.79843073; -0.07975706]	0.0166188	0.571881	0.000836399	REM
ENSG00000163492.9	-0.532717	[-0.96888590; -0.09654796]	0.0166723	0.718641	2.35623e-07	REM
ENSG00000065911.7	0.41601	[0.07460027; 0.75742006]	0.0169278	0.535219	0.00250425	REM
ENSG00000173406.11	-0.490816	[-0.89479728; -0.08683398]	0.017252	0.674199	7.11911e-06	REM
ENSG00000186687.11	-0.410006	[-0.74774746; -0.07226476]	0.0173422	0.523216	0.00342361	REM
ENSG00000258539.1	-0.44668	[-0.81517686; -0.07818381]	0.0175085	0.601961	0.000280218	REM
ENSG00000176055.9	-0.438121	[-0.80054634; -0.07569523]	0.0178189	0.593898	0.00038319	REM
ENSG00000226651.2	0.415787	[0.07144623; 0.76012798]	0.0179487	0.546391	0.0018361	REM
ENSG00000226248.2	0.414904	[0.07099747; 0.75881147]	0.0180481	0.545222	0.00189842	REM
ENSG00000213719.4	0.414681	[0.07067257; 0.75868870]	0.0181443	0.545515	0.00188267	REM
ENSG00000223639.2	0.414681	[0.07067257; 0.75868870]	0.0181443	0.545515	0.00188267	REM
ENSG00000226417.2	0.414681	[0.07067257; 0.75868870]	0.0181443	0.545515	0.00188267	REM
ENSG00000021300.9	-0.459452	[-0.84109027; -0.07781439]	0.0182929	0.628519	8.86921e-05	REM
ENSG00000139793.14	-0.415535	[-0.76130548; -0.06976358]	0.0185001	0.548922	0.00170674	REM
ENSG00000150991.10	0.462568	[0.07755659; 0.84757999]	0.0185316	0.638067	5.57478e-05	REM
ENSG00000255561.2	-0.414781	[-0.76090422; -0.06865877]	0.0188342	0.55227	0.00154703	REM
ENSG00000269657.1	0.400899	[0.06391247; 0.73788525]	0.0197148	0.511166	0.00459396	REM
ENSG00000158714.6	0.393416	[0.06153830; 0.72529347]	0.0201559	0.505362	0.00525798	REM
ENSG00000165424.6	-0.463732	[-0.85531216; -0.07215157]	0.020279	0.642014	4.56096e-05	REM
ENSG00000242028.1	0.393275	[0.06103845; 0.72551253]	0.020336	0.506811	0.00508571	REM
ENSG00000120885.15	0.423537	[0.06538763; 0.78168587]	0.0204581	0.580715	0.000619049	REM
ENSG00000186684.8	-0.38899	[-0.71927590; -0.05870345]	0.0209791	0.506937	0.00507084	REM
ENSG00000125650.4	0.399762	[0.05825287; 0.74127110]	0.0217717	0.532135	0.00271911	REM
ENSG00000132359.9	-0.448574	[-0.83354238; -0.06360653]	0.0223808	0.63622	6.11276e-05	REM
ENSG00000101187.11	0.387126	[0.05439493; 0.71985684]	0.0225827	0.515461	0.00414589	REM
ENSG00000176046.7	0.385331	[0.05361144; 0.71705015]	0.0228	0.502705	0.00558545	REM
ENSG00000168003.12	0.419933	[0.05662218; 0.78324285]	0.023484	0.591619	0.000417465	REM
ENSG00000151690.10	-0.390683	[-0.73020975; -0.05115584]	0.0241139	0.52962	0.00290495	REM
ENSG00000123975.4	0.44555	[0.05829798; 0.83280241]	0.0241293	0.634238	6.73971e-05	REM
ENSG00000127585.7	-0.376888	[-0.70482760; -0.04894800]	0.0242877	0.501014	0.00580186	REM
ENSG00000115365.7	-0.380988	[-0.71315785; -0.04881880]	0.0245723	0.50792	0.00495674	REM
ENSG00000029534.15	-0.38388	[-0.71937908; -0.04838079]	0.0249199	0.523825	0.00337136	REM
ENSG00000107829.9	-0.399793	[-0.75070741; -0.04887786]	0.0255488	0.565922	0.00101577	REM
ENSG00000182117.4	0.409734	[0.05007156; 0.76939605]	0.0255577	0.584637	0.000538869	REM
ENSG00000141542.6	-0.421762	[-0.79264683; -0.05087642]	0.0258229	0.606996	0.000228629	REM
ENSG00000135976.12	-0.483354	[-0.90865834; -0.05804994]	0.0259125	0.705395	7.37879e-07	REM
ENSG00000003402.15	0.380324	[0.04524129; 0.71540622]	0.0261061	0.520948	0.00362369	REM
ENSG00000164161.5	-0.375862	[-0.70729068; -0.04443259]	0.0262317	0.509749	0.00474971	REM
ENSG00000263264.1	-0.384901	[-0.72448135; -0.04532005]	0.0263117	0.532987	0.00265836	REM
ENSG00000132465.6	0.485348	[0.05708702; 0.91360885]	0.0263329	0.702668	9.19847e-07	REM
ENSG00000186854.6	-0.390107	[-0.73458815; -0.04562672]	0.0264457	0.548385	0.00173357	REM
ENSG00000144283.17	-0.474794	[-0.89507387; -0.05451315]	0.0268133	0.691047	2.23721e-06	REM
ENSG00000150636.11	-0.42484	[-0.80126258; -0.04841767]	0.0269593	0.622665	0.000116261	REM
ENSG00000122884.8	0.401167	[0.04455562; 0.75777938]	0.0274621	0.566901	0.000984334	REM
ENSG00000131242.11	-0.405128	[-0.76535774; -0.04489889]	0.0275037	0.581815	0.000595628	REM
ENSG00000151773.8	-0.374643	[-0.70883987; -0.04044667]	0.0280053	0.52018	0.00369352	REM
ENSG00000163235.11	-0.37975	[-0.71927733; -0.04022213]	0.0283657	0.527828	0.00304337	REM
ENSG00000272517.1	-0.37975	[-0.71927733; -0.04022213]	0.0283657	0.527828	0.00304337	REM
ENSG00000109790.12	-0.396668	[-0.75157301; -0.04176217]	0.0284782	0.570561	0.000873707	REM
ENSG00000204169.6	-0.382508	[-0.72482569; -0.04019006]	0.0285159	0.545384	0.00188969	REM
ENSG00000264204.1	-0.382508	[-0.72482569; -0.04019006]	0.0285159	0.545384	0.00188969	REM
ENSG00000152495.6	-0.380732	[-0.72179437; -0.03966904]	0.0286719	0.540729	0.00215405	REM
ENSG00000026508.12	0.374384	[0.03834526; 0.71042310]	0.0289876	0.520043	0.0037061	REM
ENSG00000014914.15	0.371189	[0.03771328; 0.70466553]	0.0291347	0.50728	0.00503082	REM
ENSG00000264524.1	0.371189	[0.03771328; 0.70466553]	0.0291347	0.50728	0.00503082	REM
ENSG00000004478.5	0.39402	[0.04000305; 0.74803680]	0.0291483	0.571792	0.000838871	REM
ENSG00000087338.4	-0.420266	[-0.79866621; -0.04186674]	0.0294912	0.626293	9.84274e-05	REM
ENSG00000169813.12	0.367383	[0.03309686; 0.70167011]	0.0312359	0.51777	0.00391945	REM
ENSG00000168884.10	0.406365	[0.03581149; 0.77691903]	0.0316011	0.604287	0.000255284	REM
ENSG00000107331.12	-0.369046	[-0.70564110; -0.03245115]	0.0316373	0.52367	0.00338454	REM
ENSG00000149781.8	0.408092	[0.03431910; 0.78186457]	0.0323577	0.610949	0.000193984	REM
ENSG00000136541.10	-0.471808	[-0.90558176; -0.03803348]	0.0330189	0.712562	4.0392e-07	REM
ENSG00000104177.13	-0.46709	[-0.89665857; -0.03752076]	0.033073	0.712047	4.22305e-07	REM
ENSG00000196296.9	0.387768	[0.03000374; 0.74553193]	0.0336388	0.578128	0.000677182	REM
ENSG00000172543.3	-0.37227	[-0.71635136; -0.02818902]	0.0339577	0.544959	0.00191271	REM
ENSG00000117602.7	-0.369007	[-0.71058546; -0.02742786]	0.0342274	0.539201	0.00224694	REM
ENSG00000149571.6	-0.368142	[-0.70904583; -0.02723835]	0.0342934	0.540755	0.00215249	REM
ENSG00000164398.8	-0.374519	[-0.72147826; -0.02755966]	0.0343715	0.557438	0.0013244	REM
ENSG00000176438.8	-0.375991	[-0.72504530; -0.02693625]	0.0347507	0.559591	0.0012397	REM
ENSG00000120280.5	0.416312	[0.02976625; 0.80285701]	0.0347782	0.635308	6.39478e-05	REM
ENSG00000226618.5	0.365327	[0.02586185; 0.70479168]	0.0349169	0.526161	0.00317677	REM
ENSG00000167632.10	-0.365606	[-0.70721051; -0.02400072]	0.035931	0.537613	0.00234689	REM
ENSG00000135250.12	-0.37501	[-0.72540160; -0.02461742]	0.0359314	0.561539	0.00116689	REM
ENSG00000142173.10	-0.417311	[-0.80733118; -0.02729147]	0.0359803	0.637913	5.61812e-05	REM
ENSG00000198900.5	0.352368	[0.02255422; 0.68218125]	0.0362569	0.501113	0.00578909	REM
ENSG00000188738.9	-0.44329	[-0.85833512; -0.02824411]	0.0363153	0.694274	1.76183e-06	REM
ENSG00000033030.9	0.360964	[0.02027418; 0.70165419]	0.037835	0.527693	0.003054	REM
ENSG00000224389.4	0.3527	[0.01829251; 0.68710821]	0.038714	0.507683	0.00498409	REM
ENSG00000182700.3	-0.370506	[-0.72227123; -0.01874064]	0.0389778	0.565318	0.00103561	REM
ENSG00000135720.8	-0.404081	[-0.78787948; -0.02028262]	0.0390575	0.631159	7.82343e-05	REM
ENSG00000159873.5	0.353364	[0.01767671; 0.68905032]	0.0390926	0.514614	0.00423142	REM
ENSG00000182670.9	-0.365334	[-0.71328904; -0.01737825]	0.0396007	0.561167	0.00118052	REM
ENSG00000267823.2	0.405068	[0.01898563; 0.79115043]	0.0397456	0.636744	5.9559e-05	REM
ENSG00000164687.6	0.355256	[0.01613947; 0.69437306]	0.0400453	0.535551	0.00248189	REM
ENSG00000204301.5	0.367168	[0.01603379; 0.71830159]	0.0404133	0.552314	0.00154502	REM
ENSG00000127720.3	-0.365548	[-0.71519904; -0.01589601]	0.0404517	0.564273	0.00107064	REM
ENSG00000126838.5	-0.396185	[-0.77610623; -0.01626297]	0.0409634	0.63025	8.17077e-05	REM
ENSG00000118298.6	-0.370871	[-0.72823173; -0.01350994]	0.0419418	0.579658	0.000642287	REM
ENSG00000154814.9	-0.374305	[-0.73500388; -0.01360528]	0.0419587	0.588292	0.000472098	REM
ENSG00000163617.6	-0.357629	[-0.70278186; -0.01247692]	0.04227	0.556835	0.00134894	REM
ENSG00000059728.6	0.421993	[0.01454239; 0.82944272]	0.0423611	0.674096	7.16695e-06	REM
ENSG00000203812.2	0.351615	[0.01208999; 0.69113937]	0.0423776	0.535064	0.00251469	REM
ENSG00000266225.1	0.351615	[0.01208999; 0.69113937]	0.0423776	0.535064	0.00251469	REM
ENSG00000164402.9	-0.41436	[-0.81628252; -0.01243823]	0.0433154	0.667793	1.06631e-05	REM
ENSG00000018510.8	-0.336201	[-0.66316551; -0.00923551]	0.0438667	0.50502	0.00529924	REM
ENSG00000189403.10	-0.34954	[-0.69055159; -0.00852909]	0.0445348	0.538472	0.0022924	REM
ENSG00000170476.11	0.408002	[0.00978514; 0.80621934]	0.0446261	0.656773	2.04921e-05	REM
ENSG00000169554.12	-0.395114	[-0.78098059; -0.00924714]	0.0447528	0.625488	0.000102165	REM
ENSG00000110852.4	0.430816	[0.01003357; 0.85159862]	0.0447778	0.693656	1.84515e-06	REM
ENSG00000109686.12	-0.367408	[-0.72782999; -0.00698665]	0.0457173	0.588242	0.00047296	REM
ENSG00000175592.4	0.34981	[0.00647038; 0.69315015]	0.045832	0.548515	0.00172704	REM
ENSG00000196440.7	-0.356927	[-0.70742591; -0.00642866]	0.0459394	0.56797	0.000950895	REM
ENSG00000268722.1	-0.356927	[-0.70742591; -0.00642866]	0.0459394	0.56797	0.000950895	REM
ENSG00000175376.4	0.372959	[0.00664192; 0.73927613]	0.0459842	0.595955	0.000354307	REM
ENSG00000268679.1	0.368921	[0.00632225; 0.73152065]	0.046133	0.58444	0.000542666	REM
ENSG00000184007.13	-0.391889	[-0.77720513; -0.00657264]	0.046214	0.629285	8.55421e-05	REM
ENSG00000109586.7	-0.35778	[-0.70969094; -0.00586980]	0.0462951	0.568236	0.000942709	REM
ENSG00000101255.6	0.348884	[0.00561343; 0.69215390]	0.0463654	0.544495	0.00193806	REM
ENSG00000197019.4	0.382778	[0.00549265; 0.76006271]	0.0467526	0.622324	0.000118067	REM
ENSG00000085788.9	-0.351137	[-0.69741118; -0.00486196]	0.0468648	0.555148	0.0014196	REM
ENSG00000100385.9	-0.347819	[-0.69249481; -0.00314234]	0.0479435	0.544768	0.00192311	REM
ENSG00000175895.3	0.371099	[0.00299755; 0.73920032]	0.0481592	0.592306	0.000406869	REM
ENSG00000088179.4	-0.352266	[-0.70300437; -0.00152800]	0.0490061	0.567862	0.000954207	REM
ENSG00000101695.4	-0.353888	[-0.70735194; -0.00042374]	0.0497218	0.572179	0.000828152	REM
ENSG00000133106.10	0.587582	[0.39508526; 0.78007826]	2.19389e-09	0	0.582174	FEM
ENSG00000138646.4	0.573412	[0.38152021; 0.76530316]	4.71621e-09	0	0.977421	FEM
ENSG00000185880.8	0.573753	[0.38085121; 0.76665537]	5.55354e-09	0.0103123	0.444204	FEM
ENSG00000170606.9	0.554451	[0.36085522; 0.74804680]	1.98429e-08	0.409378	0.0299082	FEM
ENSG00000119917.9	0.524634	[0.33273651; 0.71653198]	8.39179e-08	0	0.73888	FEM
ENSG00000114861.14	0.519073	[0.32649224; 0.71165419]	1.27164e-07	0.256426	0.143155	FEM
ENSG00000185745.8	0.515687	[0.32352773; 0.70784550]	1.44096e-07	0.0147299	0.438755	FEM
ENSG00000134321.7	0.509617	[0.31730026; 0.70193396]	2.06077e-07	0.073503	0.364649	FEM
ENSG00000137965.6	0.506205	[0.31483185; 0.69757782]	2.16667e-07	0	0.895857	FEM
ENSG00000132256.14	0.499342	[0.30630083; 0.69238391]	3.97919e-07	0.189465	0.218462	FEM
ENSG00000177688.5	0.488527	[0.29600410; 0.68104966]	6.57536e-07	0.14981	0.267283	FEM
ENSG00000019991.11	0.489711	[0.29628976; 0.68313203]	6.96268e-07	0.390115	0.0388347	FEM
ENSG00000138496.12	0.485834	[0.29264270; 0.67902453]	8.26606e-07	0.350298	0.0622403	FEM
ENSG00000184979.9	0.481578	[0.28968658; 0.67346923]	8.70355e-07	0.00279871	0.45342	FEM
ENSG00000213722.4	0.485105	[0.29095216; 0.67925839]	9.72127e-07	0.43113	0.0216095	FEM
ENSG00000173193.9	0.475567	[0.28363044; 0.66750398]	1.19571e-06	0	0.594973	FEM
ENSG00000100336.13	0.477566	[0.28440716; 0.67072495]	1.26036e-06	0.242833	0.157486	FEM
ENSG00000115267.5	0.460411	[0.26939002; 0.65143241]	2.3112e-06	0	0.972226	FEM
ENSG00000187608.5	0.45662	[0.26515276; 0.64808794]	2.94966e-06	0	0.606158	FEM
ENSG00000182551.9	-0.456123	[-0.64849323; -0.26375376]	3.36289e-06	0.286331	0.113746	FEM
ENSG00000123342.11	0.452402	[0.25957365; 0.64522941]	4.25671e-06	0.285695	0.114339	FEM
ENSG00000137959.11	0.446668	[0.25535539; 0.63798065]	4.73682e-06	0.0096222	0.445053	FEM
ENSG00000204390.8	0.445073	[0.25101886; 0.63912646]	6.94511e-06	0.458347	0.0136684	FEM
ENSG00000055332.12	0.439581	[0.24756664; 0.63159609]	7.22164e-06	0.157913	0.257139	FEM
ENSG00000137628.12	0.435753	[0.24484685; 0.62665882]	7.6841e-06	0	0.822703	FEM
ENSG00000078081.3	0.438124	[0.24554035; 0.63070679]	8.23557e-06	0.212038	0.19186	FEM
ENSG00000115009.7	0.437132	[0.24463503; 0.62962937]	8.55247e-06	0.220763	0.181875	FEM
ENSG00000165949.8	0.43196	[0.24021654; 0.62370271]	1.00779e-05	0.189332	0.218623	FEM
ENSG00000143479.11	0.426854	[0.23577393; 0.61793444]	1.1953e-05	0	0.768359	FEM
ENSG00000265184.1	0.426854	[0.23577393; 0.61793444]	1.1953e-05	0	0.768359	FEM
ENSG00000163565.14	0.430214	[0.23762795; 0.62279933]	1.19549e-05	0.284632	0.115333	FEM
ENSG00000156587.11	0.425876	[0.23408948; 0.61766236]	1.34702e-05	0.0659405	0.374309	FEM
ENSG00000182628.8	-0.428027	[-0.62088423; -0.23517071]	1.36115e-05	0.424548	0.0239284	FEM
ENSG00000243649.4	0.422966	[0.23158374; 0.61434776]	1.4795e-05	0	0.679304	FEM
ENSG00000111335.8	0.421955	[0.23089176; 0.61301873]	1.50078e-05	0	0.778348	FEM
ENSG00000066405.8	0.423934	[0.23140090; 0.61646629]	1.59111e-05	0.208447	0.19602	FEM
ENSG00000157601.9	0.420067	[0.22911929; 0.61101398]	1.61916e-05	0	0.746048	FEM
ENSG00000010030.9	0.416669	[0.22634450; 0.60699338]	1.77917e-05	0	0.993294	FEM
ENSG00000147174.7	0.420812	[0.22816562; 0.61345804]	1.8574e-05	0.257047	0.142514	FEM
ENSG00000182308.5	0.421063	[0.22782619; 0.61430070]	1.94743e-05	0.419413	0.0258521	FEM
ENSG00000185507.15	0.419745	[0.22650958; 0.61298012]	2.06722e-05	0.37936	0.0444906	FEM
ENSG00000136235.11	0.40962	[0.21806697; 0.60117382]	2.77373e-05	0	0.517152	FEM
ENSG00000205176.2	0.405339	[0.21476595; 0.59591110]	3.06175e-05	0	0.936256	FEM
ENSG00000137411.12	0.405072	[0.21406503; 0.59607859]	3.23004e-05	0	0.806105	FEM
ENSG00000079263.14	0.40472	[0.21378990; 0.59564997]	3.25759e-05	0	0.618287	FEM
ENSG00000189221.5	0.403497	[0.21301796; 0.59397650]	3.29698e-05	0	0.96397	FEM
ENSG00000188313.8	0.40584	[0.21382287; 0.59785739]	3.43422e-05	0.222536	0.179868	FEM
ENSG00000214872.4	0.396279	[0.20555242; 0.58700657]	4.65408e-05	0	0.92131	FEM
ENSG00000108950.7	0.398717	[0.20679419; 0.59064066]	4.66375e-05	0.118617	0.306854	FEM
ENSG00000134326.7	0.39725	[0.20599247; 0.58850660]	4.68101e-05	0.147916	0.269664	FEM
ENSG00000174564.8	0.399192	[0.20679633; 0.59158820]	4.76833e-05	0.383667	0.042167	FEM
ENSG00000231488.5	-0.397932	[-0.58974967; -0.20611390]	4.78111e-05	0.0379725	0.409763	FEM
ENSG00000235676.5	-0.397932	[-0.58974967; -0.20611390]	4.78111e-05	0.0379725	0.409763	FEM
ENSG00000236063.5	-0.397932	[-0.58974967; -0.20611390]	4.78111e-05	0.0379725	0.409763	FEM
ENSG00000122870.7	0.399863	[0.20684948; 0.59287720]	4.89684e-05	0.485327	0.00812759	FEM
ENSG00000196141.8	0.39738	[0.20544089; 0.58931905]	4.95213e-05	0.182213	0.227216	FEM
ENSG00000119922.7	0.396407	[0.20473312; 0.58808058]	5.04481e-05	0.155542	0.260099	FEM
ENSG00000204839.4	0.390841	[0.19881735; 0.58286519]	6.62571e-05	0.262197	0.137245	FEM
ENSG00000160307.5	-0.390409	[-0.58227782; -0.19853939]	6.6594e-05	0.162418	0.251532	FEM
ENSG00000183688.4	-0.390222	[-0.58226665; -0.19817726]	6.81687e-05	0.307963	0.0944891	FEM
ENSG00000261321.1	-0.390222	[-0.58226665; -0.19817726]	6.81687e-05	0.307963	0.0944891	FEM
ENSG00000126709.10	0.390507	[0.19793402; 0.58308054]	7.0509e-05	0.442438	0.0179974	FEM
ENSG00000152778.7	0.385683	[0.19521243; 0.57615422]	7.2238e-05	0	0.932498	FEM
ENSG00000238243.2	-0.387642	[-0.57919256; -0.19609195]	7.29445e-05	0.0449699	0.400942	FEM
ENSG00000233209.2	-0.388457	[-0.58133710; -0.19557692]	7.9003e-05	0.382663	0.0427016	FEM
ENSG00000134762.12	0.384457	[0.19342445; 0.57548999]	7.99538e-05	0	0.75466	FEM
ENSG00000152284.4	0.384806	[0.19316347; 0.57644910]	8.30056e-05	0	0.486081	FEM
ENSG00000168765.11	-0.383534	[-0.57507688; -0.19199169]	8.68756e-05	0.136092	0.284601	FEM
ENSG00000272325.1	-0.380319	[-0.57118557; -0.18945253]	9.40386e-05	0	0.605959	FEM
ENSG00000172296.8	0.38068	[0.18952001; 0.57184075]	9.49366e-05	0	0.667149	FEM
ENSG00000162722.8	-0.384226	[-0.57732661; -0.19112536]	9.62122e-05	0.462681	0.0126329	FEM
ENSG00000234947.4	0.378347	[0.18803405; 0.56866020]	9.75813e-05	0	0.989974	FEM
ENSG00000204498.6	0.381073	[0.18931290; 0.57283365]	9.82051e-05	0.0699942	0.369133	FEM
ENSG00000234972.4	0.379643	[0.18859595; 0.57068936]	9.82566e-05	0	0.646813	FEM
ENSG00000168394.9	0.383113	[0.18999932; 0.57622575]	0.000100909	0.410643	0.0293749	FEM
ENSG00000073712.9	0.376783	[0.18607071; 0.56749620]	0.000107816	0	0.767792	FEM
ENSG00000177409.7	0.377826	[0.18626197; 0.56939052]	0.000110749	0.125971	0.297468	FEM
ENSG00000120217.9	0.374795	[0.18360753; 0.56598337]	0.000121893	0.0474287	0.397833	FEM
ENSG00000213648.6	0.375812	[0.18330688; 0.56831677]	0.000130058	0.352584	0.0607129	FEM
ENSG00000257590.1	0.373852	[0.18183579; 0.56586856]	0.000135588	0.296935	0.104083	FEM
ENSG00000183826.12	0.373487	[0.18113744; 0.56583716]	0.000141376	0.492826	0.00694175	FEM
ENSG00000223494.5	0.370432	[0.17961458; 0.56124883]	0.000141843	0	0.873372	FEM
ENSG00000128512.15	0.369854	[0.17908657; 0.56062095]	0.000144702	0	0.655608	FEM
ENSG00000162409.6	0.369001	[0.17853263; 0.55946938]	0.000146354	0	0.897691	FEM
ENSG00000227993.5	-0.37263	[-0.56542850; -0.17983071]	0.000151764	0.371979	0.0486565	FEM
ENSG00000088827.8	0.368246	[0.17766108; 0.55883152]	0.000152424	0	0.866628	FEM
ENSG00000059378.8	0.369101	[0.17800502; 0.56019750]	0.000153259	0	0.52692	FEM
ENSG00000255302.3	-0.365968	[-0.55658279; -0.17535297]	0.000167841	0	0.723694	FEM
ENSG00000153208.12	0.369453	[0.17692646; 0.56198050]	0.000169113	0.329443	0.0771966	FEM
ENSG00000038945.10	0.366639	[0.17497903; 0.55829862]	0.000177248	0.116602	0.309428	FEM
ENSG00000169891.13	-0.368411	[-0.56113219; -0.17569071]	0.000179103	0.354972	0.0591415	FEM
ENSG00000143552.5	0.365745	[0.17408255; 0.55740823]	0.00018386	0.0457871	0.399909	FEM
ENSG00000117228.9	0.366629	[0.17425971; 0.55899873]	0.000187354	0.283487	0.116409	FEM
ENSG00000135114.8	0.364198	[0.17275362; 0.55564184]	0.00019251	0.134154	0.28706	FEM
ENSG00000130770.13	-0.362957	[-0.55381791; -0.17209541]	0.00019355	0.147094	0.270699	FEM
ENSG00000236884.3	-0.360448	[-0.55115208; -0.16974403]	0.000211742	0	0.895401	FEM
ENSG00000185947.10	0.362873	[0.17042457; 0.55532234]	0.000219288	0.378551	0.0449359	FEM
ENSG00000144810.11	0.363888	[0.17083229; 0.55694365]	0.000220427	0.427442	0.0228887	FEM
ENSG00000108771.8	0.359266	[0.16830051; 0.55023152]	0.000226579	0	0.632841	FEM
ENSG00000177576.6	-0.361092	[-0.55304776; -0.16913660]	0.000226911	0.458264	0.0136889	FEM
ENSG00000146373.12	0.36158	[0.16931691; 0.55384368]	0.000227739	0.378148	0.045159	FEM
ENSG00000196507.6	-0.35945	[-0.55090757; -0.16799181]	0.000233442	0.2344	0.16665	FEM
ENSG00000197971.10	-0.361285	[-0.55373744; -0.16883215]	0.000233746	0.332728	0.0747188	FEM
ENSG00000185482.3	0.358956	[0.16738235; 0.55052960]	0.000240191	0.0437086	0.402535	FEM
ENSG00000212643.1	0.356877	[0.16570512; 0.54804910]	0.0002533	0	0.490652	FEM
ENSG00000196569.7	0.359075	[0.16660957; 0.55153956]	0.000255486	0.417385	0.0266399	FEM
ENSG00000175518.6	0.359123	[0.16641958; 0.55182685]	0.000259534	0.358953	0.0565758	FEM
ENSG00000206449.7	0.357728	[0.16552694; 0.54992810]	0.000264299	0.29346	0.107203	FEM
ENSG00000013588.5	0.356628	[0.16463534; 0.54862009]	0.000271878	0.265724	0.133686	FEM
ENSG00000203666.8	-0.353839	[-0.54475896; -0.16291804]	0.000280661	0	0.53512	FEM
ENSG00000152049.5	0.355374	[0.16325686; 0.54749170]	0.000288334	0.273425	0.126061	FEM
ENSG00000074370.13	-0.354989	[-0.54697670; -0.16300187]	0.000289984	0.444173	0.0174836	FEM
ENSG00000185650.8	0.356586	[0.16366417; 0.54950758]	0.000291481	0.489265	0.00748728	FEM
ENSG00000185128.11	0.355491	[0.16305003; 0.54793118]	0.000293854	0.309511	0.0931807	FEM
ENSG00000237344.3	-0.35686	[-0.55024604; -0.16347371]	0.00029823	0.467802	0.011484	FEM
ENSG00000151012.9	0.352506	[0.16046916; 0.54454190]	0.000320905	0.41686	0.0268462	FEM
ENSG00000104964.10	-0.352649	[-0.54480206; -0.16049573]	0.0003218	0.395068	0.0363934	FEM
ENSG00000164096.10	-0.351133	[-0.54293228; -0.15933454]	0.00033291	0.338852	0.0702213	FEM
ENSG00000155719.12	0.350051	[0.15875033; 0.54135170]	0.000335146	0.0115592	0.442668	FEM
ENSG00000163568.9	0.350305	[0.15884892; 0.54176086]	0.000335544	0.107577	0.320981	FEM
ENSG00000143158.6	-0.351037	[-0.54310730; -0.15896717]	0.000340715	0.456987	0.0140059	FEM
ENSG00000134996.11	-0.347581	[-0.53833378; -0.15682915]	0.000355029	0	0.466584	FEM
ENSG00000264547.2	0.348008	[0.15619200; 0.53982472]	0.000376563	0.294449	0.10631	FEM
ENSG00000228333.5	-0.350792	[-0.54430330; -0.15728015]	0.000380826	0.495635	0.00653317	FEM
ENSG00000164430.11	0.348739	[0.15618990; 0.54128861]	0.000385393	0.381732	0.0432015	FEM
ENSG00000232045.3	-0.343936	[-0.53457742; -0.15329524]	0.000406168	0	0.807623	FEM
ENSG00000238134.4	-0.343936	[-0.53457742; -0.15329524]	0.000406168	0	0.807623	FEM
ENSG00000145779.7	0.348225	[0.15501631; 0.54143429]	0.000411563	0.460877	0.0130568	FEM
ENSG00000165475.9	-0.34269	[-0.53283953; -0.15254109]	0.000411889	0	0.932485	FEM
ENSG00000205609.8	0.343978	[0.15311340; 0.53484296]	0.000411916	0	0.586812	FEM
ENSG00000125843.6	-0.344954	[-0.53653267; -0.15337621]	0.000416877	0.293139	0.107494	FEM
ENSG00000142102.11	0.345508	[0.15329322; 0.53772222]	0.000426495	0.291507	0.108977	FEM
ENSG00000171840.7	-0.345283	[-0.53814166; -0.15242515]	0.000449656	0.460231	0.0132109	FEM
ENSG00000152433.10	0.340787	[0.14971316; 0.53185990]	0.00047276	0	0.501179	FEM
ENSG00000129680.11	0.340325	[0.14929566; 0.53135462]	0.000479772	0.0540477	0.389445	FEM
ENSG00000115163.10	0.339333	[0.14847161; 0.53019396]	0.000492705	0	0.599184	FEM
ENSG00000162645.8	0.34176	[0.14938502; 0.53413592]	0.000497691	0.367257	0.0514433	FEM
ENSG00000115415.14	0.338376	[0.14766510; 0.52908603]	0.000505911	0	0.576934	FEM
ENSG00000106258.9	0.34047	[0.14851547; 0.53242392]	0.000508086	0.359439	0.0562678	FEM
ENSG00000269849.1	0.336042	[0.14602404; 0.52606069]	0.000527855	0	0.983565	FEM
ENSG00000188001.5	0.337754	[0.14662269; 0.52888515]	0.000533045	0.0459399	0.399716	FEM
ENSG00000133858.11	0.338322	[0.14683728; 0.52980765]	0.0005342	0.230806	0.170615	FEM
ENSG00000179344.12	0.341033	[0.14786554; 0.53420111]	0.000539503	0.477356	0.00954797	FEM
ENSG00000147883.9	0.338014	[0.14590062; 0.53012648]	0.000563654	0.314481	0.0890437	FEM
ENSG00000154620.5	-0.336748	[-0.52817579; -0.14532076]	0.000564923	0.202858	0.202552	FEM
ENSG00000206315.5	-0.336749	[-0.52835731; -0.14514151]	0.000571726	0.161913	0.252159	FEM
ENSG00000164136.12	0.339017	[0.14600926; 0.53202437]	0.000575873	0.492012	0.00706381	FEM
ENSG00000178732.4	-0.335639	[-0.52694549; -0.14433343]	0.00058441	0.193103	0.214106	FEM
ENSG00000266728.1	0.334948	[0.14330760; 0.52658875]	0.000613273	0.135764	0.285016	FEM
ENSG00000139914.6	0.333076	[0.14214123; 0.52401080]	0.000628239	0	0.662429	FEM
ENSG00000068079.3	0.333756	[0.14240042; 0.52511196]	0.000629523	0.0655967	0.374747	FEM
ENSG00000088992.13	-0.333392	[-0.52464859; -0.14213478]	0.000634092	0.26537	0.134042	FEM
ENSG00000134460.11	0.332052	[0.14147123; 0.52263291]	0.000637962	0	0.751634	FEM
ENSG00000099256.14	-0.333927	[-0.52575400; -0.14209996]	0.00064509	0.367927	0.0510422	FEM
ENSG00000157978.7	-0.334791	[-0.52730455; -0.14227736]	0.000653115	0.431292	0.0215543	FEM
ENSG00000181381.9	0.330693	[0.13995412; 0.52143107]	0.000678438	0	0.552941	FEM
ENSG00000130208.5	0.331762	[0.14037509; 0.52314916]	0.000679834	0.063394	0.377556	FEM
ENSG00000120907.13	0.33031	[0.13965351; 0.52096579]	0.000684588	0	0.767106	FEM
ENSG00000104412.3	0.330586	[0.13970452; 0.52146826]	0.00068753	0.152698	0.263659	FEM
ENSG00000112312.5	0.330808	[0.13928159; 0.52233359]	0.000710871	0.192639	0.214661	FEM
ENSG00000229074.3	-0.329161	[-0.51982702; -0.13849598]	0.000715139	0	0.702596	FEM
ENSG00000161958.6	0.329972	[0.13880457; 0.52114027]	0.000716644	0.136872	0.283612	FEM
ENSG00000166938.8	-0.328677	[-0.51945952; -0.13789375]	0.000733755	0.0584634	0.383834	FEM
ENSG00000233490.3	-0.329741	[-0.52115344; -0.13832910]	0.000734288	0.103278	0.326492	FEM
ENSG00000142459.4	-0.329356	[-0.52059511; -0.13811661]	0.000736685	0.0964664	0.335226	FEM
ENSG00000107201.5	0.327949	[0.13742949; 0.51846774]	0.000741299	0	0.702316	FEM
ENSG00000167601.7	0.331539	[0.13886229; 0.52421607]	0.000744695	0.496155	0.00645951	FEM
ENSG00000196873.11	0.328284	[0.13729797; 0.51927074]	0.000754354	0.0189047	0.433586	FEM
ENSG00000124243.13	-0.32867	[-0.52020933; -0.13713045]	0.000770335	0.308926	0.093674	FEM
ENSG00000184178.11	-0.32707	[-0.51769608; -0.13644409]	0.000771265	0.000963339	0.455661	FEM
ENSG00000205413.3	0.32523	[0.13508261; 0.51537835]	0.000801141	0	0.9478	FEM
ENSG00000172893.11	-0.327085	[-0.51840286; -0.13576742]	0.000805489	0.0796484	0.356785	FEM
ENSG00000129968.11	-0.327041	[-0.51844530; -0.13563644]	0.000811242	0.361429	0.0550148	FEM
ENSG00000234032.5	-0.325538	[-0.51617895; -0.13489609]	0.000817273	0	0.747113	FEM
ENSG00000131773.9	0.326386	[0.13520379; 0.51756916]	0.000819551	0.15374	0.262354	FEM
ENSG00000108091.10	0.327412	[0.13550567; 0.51931825]	0.000825909	0.280457	0.119278	FEM
ENSG00000112333.7	0.324219	[0.13367029; 0.51476720]	0.000853161	0	0.727047	FEM
ENSG00000214954.4	0.326125	[0.13444165; 0.51780851]	0.00085394	0.276516	0.123058	FEM
ENSG00000150867.9	-0.327736	[-0.52042947; -0.13504339]	0.000857268	0.430641	0.0217763	FEM
ENSG00000138642.10	0.323644	[0.13317082; 0.51411635]	0.000867362	0	0.659949	FEM
ENSG00000129103.13	-0.323734	[-0.51443178; -0.13303527]	0.000876797	0	0.509724	FEM
ENSG00000148773.8	0.326278	[0.13395827; 0.51859675]	0.000883486	0.393384	0.037212	FEM
ENSG00000063015.15	-0.323296	[-0.51385858; -0.13273289]	0.00088355	0	0.699486	FEM
ENSG00000135835.6	0.323914	[0.13291553; 0.51491322]	0.000887495	0.0447704	0.401194	FEM
ENSG00000205085.4	0.323608	[0.13273659; 0.51447956]	0.000890451	0.13897	0.280955	FEM
ENSG00000157224.11	0.325415	[0.13320433; 0.51762551]	0.000905657	0.363925	0.0534675	FEM
ENSG00000196547.10	-0.324705	[-0.51674865; -0.13266098]	0.000919918	0.425086	0.0237328	FEM
ENSG00000160932.6	0.321802	[0.13134695; 0.51225752]	0.000927281	0	0.78297	FEM
ENSG00000165186.9	0.32206	[0.13130665; 0.51281308]	0.000935686	0	0.513707	FEM
ENSG00000198899.2	-0.322673	[-0.51388477; -0.13146101]	0.000941229	0.260817	0.138648	FEM
ENSG00000168675.14	-0.323474	[-0.51524474; -0.13170389]	0.000946088	0.315853	0.0879199	FEM
ENSG00000070614.10	-0.321204	[-0.51193770; -0.13047048]	0.000964339	0.0139027	0.439777	FEM
ENSG00000105325.9	-0.320279	[-0.51055107; -0.13000792]	0.000969539	0	0.661332	FEM
ENSG00000130475.10	-0.323839	[-0.51623119; -0.13144739]	0.000969866	0.439488	0.0188954	FEM
ENSG00000206476.9	-0.320528	[-0.51109698; -0.12996002]	0.000978485	0	0.767724	FEM
ENSG00000185989.9	-0.322241	[-0.51407902; -0.13040319]	0.000993631	0.381655	0.0432426	FEM
ENSG00000171067.6	-0.320688	[-0.51161656; -0.12975994]	0.000994536	0.103508	0.326196	FEM
ENSG00000125821.7	-0.319509	[-0.51004668; -0.12897187]	0.00101371	0	0.611732	FEM
ENSG00000116815.11	0.319325	[0.12885924; 0.50979109]	0.00101609	0	0.79785	FEM
ENSG00000236227.4	-0.321976	[-0.51451235; -0.12943955]	0.00104664	0.42846	0.0225305	FEM
ENSG00000133874.1	0.318679	[0.12766405; 0.50969430]	0.00107564	0.0879732	0.346117	FEM
ENSG00000175857.4	0.320114	[0.12780392; 0.51242425]	0.0011041	0.425073	0.0237376	FEM
ENSG00000162616.8	0.320088	[0.12763052; 0.51254502]	0.00111491	0.377355	0.0455996	FEM
ENSG00000232126.3	-0.317909	[-0.50915542; -0.12666281]	0.00112156	0.0804021	0.355819	FEM
ENSG00000143869.5	-0.320356	[-0.51346733; -0.12724506]	0.00114803	0.499587	0.00598951	FEM
ENSG00000225890.6	-0.318153	[-0.51005022; -0.12625665]	0.00115582	0.262933	0.136499	FEM
ENSG00000072694.14	0.318415	[0.12621223; 0.51061685]	0.00116604	0.324912	0.0806874	FEM
ENSG00000235125.4	-0.317655	[-0.50950915; -0.12580004]	0.00117375	0.2348	0.16621	FEM
ENSG00000154856.8	-0.314675	[-0.50474078; -0.12460940]	0.00117451	0	0.917889	FEM
ENSG00000183423.7	0.315664	[0.12494155; 0.50638622]	0.00117868	0	0.562571	FEM
ENSG00000242574.4	0.316857	[0.12530014; 0.50841408]	0.00118667	0.264307	0.135111	FEM
ENSG00000183486.8	0.314228	[0.12399136; 0.50446432]	0.00120591	0	0.849281	FEM
ENSG00000111981.4	0.315774	[0.12449713; 0.50704997]	0.00121338	0.229483	0.172083	FEM
ENSG00000135540.7	0.315241	[0.12426938; 0.50621189]	0.00121465	0.105682	0.32341	FEM
ENSG00000130396.16	0.317758	[0.12525420; 0.51026167]	0.00121519	0.474005	0.0101972	FEM
ENSG00000134184.8	-0.317273	[-0.50955544; -0.12499124]	0.00122035	0.365362	0.0525888	FEM
ENSG00000163386.16	0.316076	[0.12450397; 0.50764900]	0.00122149	0.173933	0.237317	FEM
ENSG00000111331.8	0.313481	[0.12295671; 0.50400433]	0.00126013	0	0.621962	FEM
ENSG00000132622.6	-0.315467	[-0.50731291; -0.12362060]	0.00126868	0.32101	0.083761	FEM
ENSG00000112576.8	-0.315576	[-0.50800184; -0.12315096]	0.00130724	0.474335	0.0101318	FEM
ENSG00000187514.10	-0.314695	[-0.50660125; -0.12278956]	0.00130858	0.383372	0.0423235	FEM
ENSG00000225737.5	0.312669	[0.12192825; 0.50340927]	0.00131401	0	0.647748	FEM
ENSG00000128335.9	0.313652	[0.12195219; 0.50535131]	0.00134183	0.198755	0.207388	FEM
ENSG00000102743.10	-0.312777	[-0.50395353; -0.12160106]	0.0013427	0.24768	0.152312	FEM
ENSG00000121766.10	-0.310688	[-0.50064437; -0.12073118]	0.00134724	0	0.932471	FEM
ENSG00000129473.5	-0.312185	[-0.50345370; -0.12091673]	0.00137867	0.0795745	0.356879	FEM
ENSG00000105254.7	-0.312462	[-0.50409828; -0.12082660]	0.00139452	0.291763	0.108744	FEM
ENSG00000179761.7	-0.311184	[-0.50214814; -0.12021998]	0.00140363	0	0.497327	FEM
ENSG00000226763.3	0.31325	[0.12097218; 0.50552881]	0.00140736	0.388069	0.0398733	FEM
ENSG00000179869.10	0.309912	[0.11965880; 0.50016542]	0.00140934	0	0.699206	FEM
ENSG00000060656.15	0.310668	[0.11987738; 0.50145821]	0.00141533	0	0.587563	FEM
ENSG00000214013.5	-0.31011	[-0.50086966; -0.11934988]	0.00144113	0.0435197	0.402773	FEM
ENSG00000107554.11	0.310439	[0.11916450; 0.50171331]	0.00146724	0.117676	0.308056	FEM
ENSG00000163132.6	0.310526	[0.11901735; 0.50203538]	0.00148252	0.307855	0.0945806	FEM
ENSG00000167065.9	0.312179	[0.11963715; 0.50472099]	0.00148367	0.469287	0.0111656	FEM
ENSG00000151327.8	-0.309784	[-0.50131183; -0.11825586]	0.0015235	0.360465	0.0556194	FEM
ENSG00000112773.11	0.309149	[0.11801127; 0.50028661]	0.00152369	0.0390643	0.408389	FEM
ENSG00000198563.9	0.308683	[0.11765900; 0.49970761]	0.00153895	0	0.517536	FEM
ENSG00000179750.11	0.308091	[0.11718974; 0.49899297]	0.00156048	0.000985823	0.455634	FEM
ENSG00000152766.5	0.307278	[0.11673790; 0.49781724]	0.00157319	0	0.780884	FEM
ENSG00000172508.6	-0.309392	[-0.50183868; -0.11694434]	0.00162694	0.44996	0.0158446	FEM
ENSG00000112992.12	-0.307021	[-0.49801897; -0.11602381]	0.00162921	0.211338	0.192668	FEM
ENSG00000125355.11	0.306431	[0.11575806; 0.49710418]	0.00163315	0.0217915	0.430002	FEM
ENSG00000268760.1	0.306431	[0.11575806; 0.49710418]	0.00163315	0.0217915	0.430002	FEM
ENSG00000147168.8	0.309837	[0.11701036; 0.50266451]	0.0016363	0.465169	0.0120646	FEM
ENSG00000213906.5	-0.30597	[-0.49653601; -0.11540380]	0.00164986	0	0.499523	FEM
ENSG00000042304.6	0.305745	[0.11530580; 0.49618379]	0.00165108	0	0.78088	FEM
ENSG00000169635.5	0.3072	[0.11567122; 0.49872858]	0.00166817	0.354618	0.0593728	FEM
ENSG00000224952.3	-0.306243	[-0.49727498; -0.11521007]	0.00167764	0.00955021	0.445141	FEM
ENSG00000246366.2	0.30535	[0.11461683; 0.49608217]	0.00170209	0	0.586913	FEM
ENSG00000130413.11	0.303703	[0.11373235; 0.49367453]	0.00172783	0	0.924018	FEM
ENSG00000242550.1	0.303842	[0.11372514; 0.49395949]	0.00173359	0	0.891243	FEM
ENSG00000214941.3	-0.306574	[-0.49842835; -0.11471995]	0.00173626	0.456071	0.0142364	FEM
ENSG00000228892.5	-0.305682	[-0.49703459; -0.11432843]	0.00174183	0.106118	0.32285	FEM
ENSG00000236873.5	-0.305682	[-0.49703459; -0.11432843]	0.00174183	0.106118	0.32285	FEM
ENSG00000204351.7	0.304891	[0.11396374; 0.49581760]	0.00174855	0	0.503774	FEM
ENSG00000232367.5	0.307109	[0.11474047; 0.49947846]	0.00175365	0.359657	0.0561295	FEM
ENSG00000196814.10	-0.305243	[-0.49659400; -0.11389298]	0.00176838	0.168622	0.243851	FEM
ENSG00000237889.7	0.306744	[0.11442466; 0.49906395]	0.00177115	0.405714	0.0314895	FEM
ENSG00000110092.3	-0.303852	[-0.49444499; -0.11325855]	0.00177977	0	0.705018	FEM
ENSG00000165805.5	0.302901	[0.11279151; 0.49300991]	0.001791	0	0.880128	FEM
ENSG00000136279.14	-0.30324	[-0.49373728; -0.11274331]	0.0018085	0	0.475576	FEM
ENSG00000196208.9	0.303318	[0.11274864; 0.49388683]	0.00181086	0	0.574811	FEM
ENSG00000159618.11	-0.304164	[-0.49537401; -0.11295302]	0.00182192	0.254193	0.14547	FEM
ENSG00000187193.8	0.30322	[0.11250242; 0.49393780]	0.00183208	0	0.626878	FEM
ENSG00000087303.12	-0.304522	[-0.49610021; -0.11294391]	0.00183628	0.261586	0.137865	FEM
ENSG00000172345.9	0.303636	[0.11260678; 0.49466569]	0.00183716	0.0936802	0.338799	FEM
ENSG00000089063.10	-0.30247	[-0.49276623; -0.11217307]	0.00183727	0	0.689557	FEM
ENSG00000204516.5	0.304653	[0.11285119; 0.49645401]	0.00185061	0.241994	0.158389	FEM
ENSG00000110172.7	0.3067	[0.11342550; 0.49997518]	0.0018693	0.497266	0.00630447	FEM
ENSG00000206372.7	0.301952	[0.11156752; 0.49233574]	0.00187986	0	0.724686	FEM
ENSG00000235017.5	0.301952	[0.11156752; 0.49233574]	0.00187986	0	0.724686	FEM
ENSG00000133142.13	-0.300841	[-0.49141964; -0.11026263]	0.00197482	0	0.608127	FEM
ENSG00000147533.12	-0.302049	[-0.49345394; -0.11064389]	0.00198144	0.28866	0.111588	FEM
ENSG00000214046.4	-0.300127	[-0.49037783; -0.10987553]	0.00198842	0	0.632132	FEM
ENSG00000196616.8	0.302806	[0.11069172; 0.49492003]	0.00200624	0.41012	0.0295947	FEM
ENSG00000205309.9	-0.300776	[-0.49166221; -0.10988942]	0.00201283	0.174031	0.237197	FEM
ENSG00000166920.6	0.301579	[0.11011962; 0.49303832]	0.00201975	0.159732	0.254872	FEM
ENSG00000212866.5	0.300841	[0.10958562; 0.49209544]	0.00204894	0.300699	0.100755	FEM
ENSG00000120860.6	-0.300201	[-0.49124012; -0.10916106]	0.00207032	0.173199	0.238218	FEM
ENSG00000111196.5	-0.298502	[-0.48883864; -0.10816507]	0.00211327	0	0.537033	FEM
ENSG00000204899.5	-0.300461	[-0.49219721; -0.10872485]	0.00213039	0.34436	0.0663108	FEM
ENSG00000166681.9	-0.298885	[-0.48966429; -0.10810506]	0.00213606	0.250768	0.149052	FEM
ENSG00000231179.5	0.299802	[0.10827718; 0.49132782]	0.00215447	0.168999	0.243385	FEM
ENSG00000105141.4	0.298746	[0.10781162; 0.48967969]	0.00216421	0.00228794	0.454044	FEM
ENSG00000132170.15	0.299614	[0.10805561; 0.49117173]	0.00217225	0.224978	0.177118	FEM
ENSG00000125740.9	-0.300221	[-0.49229317; -0.10814855]	0.00218691	0.448346	0.0162903	FEM
ENSG00000071246.6	-0.299271	[-0.49074188; -0.10780051]	0.0021876	0.33592	0.0723553	FEM
ENSG00000175556.12	0.298944	[0.10767795; 0.49021061]	0.00218816	0.185102	0.223719	FEM
ENSG00000270629.1	0.300461	[0.10809003; 0.49283282]	0.00220386	0.415622	0.0273376	FEM
ENSG00000127526.9	-0.300059	[-0.49222164; -0.10789618]	0.00220962	0.460549	0.013135	FEM
ENSG00000154262.8	0.298262	[0.10716478; 0.48935897]	0.00221971	0.0700933	0.369007	FEM
ENSG00000126217.16	-0.298546	[-0.48985481; -0.10723783]	0.00222317	0.285597	0.11443	FEM
ENSG00000173068.13	0.299775	[0.10765499; 0.49189450]	0.00222602	0.350599	0.0620375	FEM
ENSG00000089127.8	0.296151	[0.10618499; 0.48611669]	0.00224627	0	0.93037	FEM
ENSG00000141837.14	0.298058	[0.10673819; 0.48937850]	0.00226196	0.227212	0.174614	FEM
ENSG00000163823.3	0.297526	[0.10647969; 0.48857243]	0.00227015	0	0.468906	FEM
ENSG00000105219.4	0.297352	[0.10633014; 0.48837308]	0.0022807	0.00408062	0.451852	FEM
ENSG00000114638.3	0.297803	[0.10643898; 0.48916718]	0.00228708	0.17521	0.235753	FEM
ENSG00000242013.4	0.297563	[0.10632958; 0.48879647]	0.00228995	0.281047	0.118716	FEM
ENSG00000120586.4	0.299447	[0.10699154; 0.49190340]	0.00229133	0.409116	0.0300196	FEM
ENSG00000135069.9	0.295575	[0.10559680; 0.48555415]	0.00229271	0	0.867565	FEM
ENSG00000078804.8	-0.299296	[-0.49174559; -0.10684624]	0.00230237	0.424336	0.0240059	FEM
ENSG00000143156.9	0.295737	[0.10534458; 0.48613009]	0.0023309	0	0.70987	FEM
ENSG00000115361.3	0.295874	[0.10532474; 0.48642332]	0.0023394	0	0.652645	FEM
ENSG00000095637.16	0.296795	[0.10560823; 0.48798080]	0.00234487	0.18893	0.219105	FEM
ENSG00000184900.11	-0.29721	[-0.48871539; -0.10570382]	0.00235133	0.376245	0.0462205	FEM
ENSG00000168067.7	-0.296206	[-0.48713034; -0.10528104]	0.00235953	0.246566	0.153495	FEM
ENSG00000148288.7	0.29605	[0.10521396; 0.48688521]	0.00236098	0.0040449	0.451896	FEM
ENSG00000135912.6	0.294939	[0.10479592; 0.48508172]	0.00236389	0	0.786376	FEM
ENSG00000064115.6	-0.296224	[-0.48733244; -0.10511531]	0.00238109	0.24031	0.160207	FEM
ENSG00000132680.6	0.296372	[0.10516028; 0.48758446]	0.00238206	0.139639	0.280108	FEM
ENSG00000241713.3	-0.29592	[-0.48702233; -0.10481775]	0.00240503	0.0307114	0.418874	FEM
ENSG00000131480.4	0.297688	[0.10540608; 0.48996991]	0.00240981	0.452099	0.0152677	FEM
ENSG00000196890.3	0.29439	[0.10350403; 0.48527642]	0.00250473	0	0.457357	FEM
ENSG00000125966.8	-0.293002	[-0.48309864; -0.10290465]	0.0025194	0	0.875633	FEM
ENSG00000167740.5	-0.293922	[-0.48465044; -0.10319331]	0.00252396	0.0519477	0.39211	FEM
ENSG00000249459.4	0.293873	[0.10288040; 0.48486628]	0.00256323	0	0.459354	FEM
ENSG00000148411.3	-0.294048	[-0.48529572; -0.10279950]	0.00258221	0.240788	0.15969	FEM
ENSG00000137486.12	-0.294323	[-0.48580746; -0.10283797]	0.00258995	0.282146	0.117674	FEM
ENSG00000220008.2	-0.293886	[-0.48528589; -0.10248594]	0.00261686	0.290654	0.109756	FEM
ENSG00000080644.11	0.292151	[0.10187731; 0.48242509]	0.00261737	0	0.756119	FEM
ENSG00000140259.6	0.293346	[0.10219798; 0.48449494]	0.00263044	0.14475	0.273652	FEM
ENSG00000117724.8	0.294578	[0.10261170; 0.48654393]	0.00263251	0.495462	0.00655783	FEM
ENSG00000198843.8	-0.294293	[-0.48617170; -0.10241504]	0.00264579	0.474924	0.010016	FEM
ENSG00000002549.8	0.292179	[0.10138763; 0.48296974]	0.00268603	0	0.523962	FEM
ENSG00000226560.6	0.291677	[0.10117434; 0.48217885]	0.00269146	0	0.631722	FEM
ENSG00000178199.9	0.292925	[0.10133712; 0.48451324]	0.00272913	0.259876	0.13961	FEM
ENSG00000103995.9	0.294047	[0.10169476; 0.48639862]	0.00273336	0.40593	0.0313945	FEM
ENSG00000143341.7	0.29139	[0.10075785; 0.48202185]	0.0027359	0	0.502856	FEM
ENSG00000168291.8	-0.291589	[-0.48274516; -0.10043300]	0.00279179	0.317082	0.0869189	FEM
ENSG00000090097.16	-0.292679	[-0.48456898; -0.10078835]	0.00279463	0.40141	0.0334162	FEM
ENSG00000074935.9	0.290916	[0.10001482; 0.48181635]	0.00281855	0.0812168	0.354776	FEM
ENSG00000264528.2	0.290916	[0.10001482; 0.48181635]	0.00281855	0.0812168	0.354776	FEM
ENSG00000120675.4	-0.29315	[-0.48570182; -0.10059842]	0.00284507	0.489506	0.00744942	FEM
ENSG00000261694.1	-0.293093	[-0.48571930; -0.10046702]	0.00286122	0.460689	0.0131016	FEM
ENSG00000137133.6	-0.29011	[-0.48091344; -0.09930660]	0.00288143	0.0623698	0.378861	FEM
ENSG00000158604.10	-0.290258	[-0.48119771; -0.09931890]	0.00288708	0.313585	0.0897827	FEM
ENSG00000101849.11	0.29071	[0.09942627; 0.48199411]	0.00289402	0.200157	0.205732	FEM
ENSG00000088256.4	-0.29157	[-0.48342506; -0.09971417]	0.00289491	0.37262	0.0482854	FEM
ENSG00000164318.13	0.28982	[0.09879998; 0.48083937]	0.00294176	0.0379378	0.409807	FEM
ENSG00000110455.9	-0.288478	[-0.47861673; -0.09833835]	0.00294237	0	0.582068	FEM
ENSG00000163376.7	0.289728	[0.09869481; 0.48076170]	0.00295282	0.123958	0.300035	FEM
ENSG00000152642.6	-0.288793	[-0.47938150; -0.09820364]	0.0029788	0.0923186	0.340545	FEM
ENSG00000260178.1	0.287135	[0.09733523; 0.47693519]	0.00302537	0	0.94441	FEM
ENSG00000130303.8	0.291079	[0.09848422; 0.48367313]	0.00305393	0.422342	0.0247423	FEM
ENSG00000162433.10	0.287055	[0.09697642; 0.47713422]	0.00307666	0	0.896808	FEM
ENSG00000136514.2	0.287034	[0.09695148; 0.47711706]	0.00307943	0	0.876817	FEM
ENSG00000184371.9	0.289862	[0.09788791; 0.48183545]	0.0030823	0.388155	0.0398293	FEM
ENSG00000122711.4	0.286895	[0.09676742; 0.47702342]	0.00310084	0	0.81992	FEM
ENSG00000118557.11	0.28777	[0.09691515; 0.47862521]	0.00312388	0.0011558	0.455427	FEM
ENSG00000144550.8	0.287654	[0.09687215; 0.47843562]	0.00312448	0.0824263	0.353226	FEM
ENSG00000111832.8	-0.287778	[-0.47874183; -0.09681459]	0.0031401	0.302988	0.0987588	FEM
ENSG00000115414.14	0.288195	[0.09668550; 0.47970458]	0.00318262	0.229267	0.172323	FEM
ENSG00000160310.12	-0.287598	[-0.47876149; -0.09643436]	0.00319071	0.264444	0.134973	FEM
ENSG00000086061.11	0.288683	[0.09652096; 0.48084408]	0.00323488	0.377196	0.0456878	FEM
ENSG00000169925.12	-0.288155	[-0.47997970; -0.09632959]	0.00323726	0.389228	0.0392831	FEM
ENSG00000143079.10	0.28489	[0.09521869; 0.47456039]	0.00324041	0	0.966927	FEM
ENSG00000145965.5	0.285385	[0.09536479; 0.47540447]	0.00324356	0	0.895221	FEM
ENSG00000120210.6	0.285975	[0.09522348; 0.47672645]	0.00329873	0	0.48695	FEM
ENSG00000118193.7	0.286799	[0.09547042; 0.47812836]	0.00330324	0.162608	0.251295	FEM
ENSG00000182704.6	0.288604	[0.09603989; 0.48116788]	0.00330832	0.480126	0.00903497	FEM
ENSG00000096696.9	0.28612	[0.09515664; 0.47708243]	0.00331761	0.0392959	0.408098	FEM
ENSG00000161547.10	-0.284381	[-0.47467369; -0.09408829]	0.00339943	0	0.559395	FEM
ENSG00000145888.6	0.284046	[0.09386794; 0.47422398]	0.00341792	0	0.761346	FEM
ENSG00000170873.14	-0.286519	[-0.47840685; -0.09463171]	0.00342691	0.327318	0.0788228	FEM
ENSG00000241489.3	-0.284526	[-0.47514300; -0.09390854]	0.00343788	0.0381952	0.409483	FEM
ENSG00000177989.9	0.284297	[0.09370988; 0.47488434]	0.00345884	0	0.610368	FEM
ENSG00000229295.7	-0.283734	[-0.47408195; -0.09338539]	0.00348259	0	0.802515	FEM
ENSG00000180083.6	0.28534	[0.09384332; 0.47683634]	0.00349467	0.385578	0.0411613	FEM
ENSG00000131188.7	-0.283782	[-0.47438027; -0.09318310]	0.00352015	0	0.50591	FEM
ENSG00000254553.1	0.285016	[0.09355161; 0.47648125]	0.00352651	0.234814	0.166195	FEM
ENSG00000184305.10	0.284159	[0.09326413; 0.47505304]	0.00352753	0.220819	0.181812	FEM
ENSG00000122574.6	0.282451	[0.09256732; 0.47233430]	0.00355129	0	0.926957	FEM
ENSG00000204961.5	0.284333	[0.09317385; 0.47549218]	0.00355309	0.109213	0.318886	FEM
ENSG00000272794.1	0.284333	[0.09317385; 0.47549218]	0.00355309	0.109213	0.318886	FEM
ENSG00000021488.8	0.2827	[0.09257790; 0.47282236]	0.00356373	0	0.859171	FEM
ENSG00000172115.4	-0.282867	[-0.47334834; -0.09238507]	0.00360718	0	0.535208	FEM
ENSG00000078177.9	0.283098	[0.09233528; 0.47386114]	0.00362933	0.0149903	0.438433	FEM
ENSG00000114739.9	0.282675	[0.09202631; 0.47332380]	0.00365972	0.00559934	0.449992	FEM
ENSG00000172183.10	0.284324	[0.09255309; 0.47609452]	0.00366149	0.280238	0.119485	FEM
ENSG00000173401.5	0.284147	[0.09221296; 0.47608126]	0.00371187	0.331078	0.075958	FEM
ENSG00000112146.12	-0.28325	[-0.47460250; -0.09189773]	0.00371621	0.32485	0.0807357	FEM
ENSG00000130544.7	0.282147	[0.09148532; 0.47280824]	0.00372604	0	0.60783	FEM
ENSG00000132801.5	0.28138	[0.09122497; 0.47153557]	0.00372819	0	0.818809	FEM
ENSG00000071051.9	-0.284334	[-0.47655365; -0.09211377]	0.00374054	0.434784	0.0203917	FEM
ENSG00000173805.11	0.282656	[0.09156634; 0.47374652]	0.00374127	0.121785	0.302807	FEM
ENSG00000261125.1	0.282656	[0.09156634; 0.47374652]	0.00374127	0.121785	0.302807	FEM
ENSG00000166435.11	0.28398	[0.09177240; 0.47618819]	0.00378157	0.376332	0.0461714	FEM
ENSG00000271326.1	0.281445	[0.09087895; 0.47201103]	0.00379517	0	0.567905	FEM
ENSG00000125148.6	0.281266	[0.09052749; 0.47200435]	0.00384939	0.0125372	0.441462	FEM
ENSG00000103260.4	-0.28115	[-0.47182988; -0.09046917]	0.00385326	0	0.528737	FEM
ENSG00000013016.10	-0.281188	[-0.47215350; -0.09022309]	0.0039015	0.255048	0.144582	FEM
ENSG00000173905.4	0.281349	[0.09010079; 0.47259807]	0.00393417	0.235103	0.165879	FEM
ENSG00000170837.2	-0.279011	[-0.46891423; -0.08910830]	0.00398064	0	0.900214	FEM
ENSG00000169314.10	-0.281257	[-0.47274323; -0.08977014]	0.00399115	0.356043	0.0584446	FEM
ENSG00000107902.9	-0.282261	[-0.47443501; -0.09008791]	0.0039917	0.440817	0.0184871	FEM
ENSG00000138035.10	0.278997	[0.08899364; 0.46899998]	0.00400174	0	0.864683	FEM
ENSG00000135094.6	0.278675	[0.08864382; 0.46870519]	0.00404945	0	0.883175	FEM
ENSG00000153993.9	0.279096	[0.08854546; 0.46964687]	0.00409465	0	0.496631	FEM
ENSG00000204611.2	0.278834	[0.08845351; 0.46921514]	0.00409638	0	0.689616	FEM
ENSG00000144746.6	-0.27905	[-0.46978112; -0.08831984]	0.004136	0.19427	0.212714	FEM
ENSG00000179542.11	0.279792	[0.08849802; 0.47108659]	0.0041471	0.231571	0.169768	FEM
ENSG00000175564.8	0.279434	[0.08830519; 0.47056251]	0.00416274	0.115412	0.310951	FEM
ENSG00000153879.4	0.279344	[0.08821665; 0.47047065]	0.00417459	0.156332	0.259113	FEM
ENSG00000269007.1	0.279891	[0.08828720; 0.47149575]	0.00419483	0.273025	0.126452	FEM
ENSG00000128322.6	0.279252	[0.08807776; 0.47042597]	0.00419635	0.169343	0.242962	FEM
ENSG00000105928.9	0.278035	[0.08767441; 0.46839526]	0.00420024	0	0.574128	FEM
ENSG00000256087.2	0.279039	[0.08796982; 0.47010842]	0.00420446	0.0976019	0.333769	FEM
ENSG00000002587.5	0.280783	[0.08850248; 0.47306375]	0.00420785	0.457255	0.0139389	FEM
ENSG00000157107.9	0.278194	[0.08730592; 0.46908226]	0.00428422	0.0931225	0.339514	FEM
ENSG00000152380.5	0.279634	[0.08759476; 0.47167236]	0.00431704	0.402105	0.0330997	FEM
ENSG00000186871.5	0.276984	[0.08673789; 0.46722962]	0.00432251	0	0.752104	FEM
ENSG00000152348.11	-0.278232	[-0.46945352; -0.08701070]	0.00434655	0.195847	0.210838	FEM
ENSG00000166501.8	-0.280142	[-0.47268121; -0.08760372]	0.00434744	0.496873	0.00635892	FEM
ENSG00000183283.11	-0.277201	[-0.46779295; -0.08660999]	0.00436262	0.157645	0.257473	FEM
ENSG00000135541.16	0.278026	[0.08669228; 0.46935949]	0.00439858	0.223263	0.179049	FEM
ENSG00000185499.12	0.277435	[0.08643138; 0.46843794]	0.00441438	0.0330602	0.415932	FEM
ENSG00000170379.15	0.279369	[0.08691546; 0.47182171]	0.00443873	0.435648	0.020111	FEM
ENSG00000105426.10	-0.278437	[-0.47036961; -0.08650355]	0.00446399	0.454599	0.0146125	FEM
ENSG00000144445.11	0.279136	[0.08670473; 0.47156801]	0.00446735	0.431718	0.0214102	FEM
ENSG00000124253.9	0.275976	[0.08560682; 0.46634511]	0.00449174	0	0.601324	FEM
ENSG00000232005.3	-0.275037	[-0.46498157; -0.08509331]	0.00453882	0	0.832229	FEM
ENSG00000154553.9	0.277073	[0.08555447; 0.46859072]	0.00457446	0.25359	0.146099	FEM
ENSG00000176533.8	-0.276772	[-0.46819187; -0.08535282]	0.00459762	0.312247	0.0908916	FEM
ENSG00000166260.6	-0.275937	[-0.46688469; -0.08498886]	0.00462036	0.221778	0.180725	FEM
ENSG00000254996.1	0.274311	[0.08432258; 0.46429884]	0.00465613	0	0.899437	FEM
ENSG00000001461.12	-0.277858	[-0.47039490; -0.08532016]	0.004676	0.489156	0.00750453	FEM
ENSG00000165338.12	0.275831	[0.08456863; 0.46709325]	0.004704	0.242273	0.158088	FEM
ENSG00000168955.3	0.274805	[0.08425174; 0.46535742]	0.00470448	0	0.552571	FEM
ENSG00000170222.11	0.275535	[0.08429546; 0.46677489]	0.00474377	0.334307	0.0735445	FEM
ENSG00000168404.8	0.275589	[0.08425121; 0.46692763]	0.00475708	0.229253	0.17234	FEM
ENSG00000079257.3	0.27457	[0.08364782; 0.46549229]	0.00482148	0.102063	0.328048	FEM
ENSG00000140836.10	0.276267	[0.08412052; 0.46841333]	0.00483124	0.380838	0.0436845	FEM
ENSG00000151846.7	0.273738	[0.08330997; 0.46416573]	0.00484026	0.0746964	0.363123	FEM
ENSG00000145022.4	-0.273566	[-0.46390504; -0.08322663]	0.00484718	0	0.553824	FEM
ENSG00000203836.7	0.273958	[0.08312701; 0.46478924]	0.00489618	0.0549225	0.388334	FEM
ENSG00000142528.11	0.275633	[0.08348626; 0.46778010]	0.00492952	0.463125	0.01253	FEM
ENSG00000004534.10	0.2752	[0.08326294; 0.46713657]	0.00495022	0.351714	0.0612918	FEM
ENSG00000188191.10	-0.27455	[-0.46608971; -0.08301004]	0.00496293	0.330634	0.0762932	FEM
ENSG00000099622.9	-0.273792	[-0.46489131; -0.08269200]	0.00498309	0.329249	0.0773441	FEM
ENSG00000139915.14	0.272918	[0.08232836; 0.46350752]	0.00500589	0	0.50164	FEM
ENSG00000166803.6	0.273094	[0.08214334; 0.46404542]	0.00506057	0.114511	0.312104	FEM
ENSG00000127955.11	-0.274185	[-0.46594591; -0.08242452]	0.00507134	0.309645	0.0930677	FEM
ENSG00000119630.9	0.271503	[0.08160653; 0.46139947]	0.00507405	0	0.940496	FEM
ENSG00000167323.5	-0.273362	[-0.46470364; -0.08202065]	0.00510748	0.335968	0.0723201	FEM
ENSG00000181392.10	0.272334	[0.08156447; 0.46310301]	0.00514187	0	0.524087	FEM
ENSG00000225590.5	-0.272226	[-0.46293147; -0.08152091]	0.00514452	0	0.512199	FEM
ENSG00000228425.5	-0.272226	[-0.46293147; -0.08152091]	0.00514452	0	0.512199	FEM
ENSG00000237724.5	-0.274299	[-0.46647549; -0.08212301]	0.00514886	0.408091	0.0304575	FEM
ENSG00000109805.5	0.273919	[0.08195043; 0.46588741]	0.00516251	0.464322	0.0122558	FEM
ENSG00000137804.8	0.271664	[0.08127216; 0.46205581]	0.00516337	0	0.736019	FEM
ENSG00000203485.8	-0.273628	[-0.46542731; -0.08182791]	0.00517076	0.31212	0.0909966	FEM
ENSG00000196535.10	-0.271314	[-0.46151088; -0.08111634]	0.00517536	0	0.754783	FEM
ENSG00000035664.7	-0.272697	[-0.46387385; -0.08152077]	0.00517753	0.13233	0.289376	FEM
ENSG00000130487.4	0.272137	[0.08120003; 0.46307368]	0.00521358	0.208874	0.195524	FEM
ENSG00000100351.12	-0.272286	[-0.46357976; -0.08099237]	0.00527325	0.409009	0.030065	FEM
ENSG00000198668.6	-0.270003	[-0.45991288; -0.08009409]	0.00532596	0	0.76337	FEM
ENSG00000175911.4	0.27218	[0.08066796; 0.46369274]	0.00534317	0.250378	0.149462	FEM
ENSG00000070778.8	0.270683	[0.08018698; 0.46117836]	0.00535212	0	0.599277	FEM
ENSG00000142661.14	0.272363	[0.08055175; 0.46417365]	0.00538406	0.339618	0.0696701	FEM
ENSG00000130783.9	0.271555	[0.08012124; 0.46298830]	0.00543046	0.213058	0.190684	FEM
ENSG00000164946.15	0.269751	[0.07919387; 0.46030765]	0.00552765	0.0644458	0.376215	FEM
ENSG00000184984.8	0.269065	[0.07866460; 0.45946637]	0.00560944	0	0.595523	FEM
ENSG00000185813.6	-0.268986	[-0.45935559; -0.07861574]	0.00561584	0	0.697779	FEM
ENSG00000109066.9	-0.271121	[-0.46316213; -0.07907955]	0.0056558	0.483773	0.00839119	FEM
ENSG00000239388.4	0.270329	[0.07871154; 0.46194593]	0.00569021	0.337672	0.0710755	FEM
ENSG00000110777.7	0.26918	[0.07836616; 0.45999464]	0.00569299	0.034557	0.414055	FEM
ENSG00000115904.8	0.269227	[0.07834170; 0.46011219]	0.00570261	0.1032	0.326591	FEM
ENSG00000089053.8	-0.269162	[-0.46001749; -0.07830623]	0.00570679	0.267752	0.131658	FEM
ENSG00000272204.1	-0.269162	[-0.46001749; -0.07830623]	0.00570679	0.267752	0.131658	FEM
ENSG00000172901.15	0.271488	[0.07887360; 0.46410155]	0.00573427	0.455891	0.014282	FEM
ENSG00000171703.12	-0.267976	[-0.45819125; -0.07776141]	0.00575781	0	0.607605	FEM
ENSG00000272414.1	0.269824	[0.07812589; 0.46152135]	0.00580153	0.325306	0.08038	FEM
ENSG00000269190.1	0.268049	[0.07757055; 0.45852716]	0.0058122	0	0.668786	FEM
ENSG00000165091.11	0.26806	[0.07752290; 0.45859678]	0.0058253	0	0.654908	FEM
ENSG00000173801.12	0.267225	[0.07725977; 0.45719096]	0.00583094	0	0.899504	FEM
ENSG00000234218.5	-0.26898	[-0.46026835; -0.07769119]	0.00585046	0.175436	0.235476	FEM
ENSG00000131171.8	-0.268899	[-0.46050087; -0.07729728]	0.00594651	0.442777	0.0178963	FEM
ENSG00000237693.4	0.267388	[0.07672110; 0.45805401]	0.00598372	0.0151587	0.438225	FEM
ENSG00000213928.4	0.268573	[0.07701038; 0.46013661]	0.00599709	0.254772	0.144869	FEM
ENSG00000100068.7	0.267789	[0.07673809; 0.45884028]	0.00600957	0.116818	0.309153	FEM
ENSG00000154920.10	0.267069	[0.07642816; 0.45770993]	0.00603697	0.101662	0.328562	FEM
ENSG00000225691.2	-0.266481	[-0.45670934; -0.07625187]	0.00603907	0	0.760346	FEM
ENSG00000105771.9	0.267034	[0.07639584; 0.45767126]	0.00604285	0.124819	0.298937	FEM
ENSG00000129636.8	-0.26655	[-0.45684238; -0.07625685]	0.00604299	0	0.608707	FEM
ENSG00000102575.6	0.266405	[0.07592762; 0.45688154]	0.00611981	0	0.629	FEM
ENSG00000250127.1	0.266018	[0.07572458; 0.45631075]	0.00614475	0	0.521987	FEM
ENSG00000155363.14	0.265984	[0.07564357; 0.45632519]	0.00616403	0	0.698284	FEM
ENSG00000159399.5	0.2671	[0.07593115; 0.45826951]	0.00617203	0.157769	0.257319	FEM
ENSG00000137265.10	0.26884	[0.07635983; 0.46132000]	0.00618964	0.449687	0.0159194	FEM
ENSG00000133256.8	-0.268285	[-0.46044454; -0.07612480]	0.0062104	0.429526	0.0221595	FEM
ENSG00000185869.9	0.26641	[0.07541636; 0.45740398]	0.00625831	0.106798	0.321979	FEM
ENSG00000128609.10	-0.265958	[-0.45675769; -0.07515822]	0.00629384	0.221732	0.180778	FEM
ENSG00000107798.13	-0.265657	[-0.45631263; -0.07500075]	0.00631367	0	0.486216	FEM
ENSG00000204387.8	-0.265763	[-0.45653744; -0.07498824]	0.00632533	0.195493	0.211258	FEM
ENSG00000167123.14	-0.26807	[-0.46052487; -0.07561578]	0.00633174	0.458882	0.0135373	FEM
ENSG00000068354.11	-0.266428	[-0.45775051; -0.07510571]	0.00634459	0.328347	0.0780327	FEM
ENSG00000269499.2	-0.266428	[-0.45775051; -0.07510571]	0.00634459	0.328347	0.0780327	FEM
ENSG00000177990.7	-0.26592	[-0.45696256; -0.07487767]	0.00636795	0.360323	0.0557088	FEM
ENSG00000092439.9	0.26669	[0.07508741; 0.45829341]	0.00636992	0.299225	0.102053	FEM
ENSG00000124134.4	-0.266853	[-0.45859634; -0.07510944]	0.00637644	0.373273	0.0479095	FEM
ENSG00000270757.1	0.267279	[0.07501232; 0.45954516]	0.00643619	0.47577	0.00985139	FEM
ENSG00000083457.7	-0.264507	[-0.45479630; -0.07421859]	0.00644065	0	0.707283	FEM
ENSG00000234127.4	0.264282	[0.07415183; 0.45441208]	0.00644163	0	0.807873	FEM
ENSG00000232062.4	-0.266286	[-0.45793649; -0.07463600]	0.00646334	0.296058	0.104867	FEM
ENSG00000105948.9	0.263078	[0.07357584; 0.45258116]	0.00650878	0	0.988587	FEM
ENSG00000146540.10	-0.264574	[-0.45519348; -0.07395503]	0.00651978	0.17861	0.231599	FEM
ENSG00000169247.7	-0.266289	[-0.45825075; -0.07432672]	0.0065499	0.451901	0.0153204	FEM
ENSG00000135625.6	0.263334	[0.07347854; 0.45318999]	0.00655657	0	0.829913	FEM
ENSG00000224838.2	0.26551	[0.07404124; 0.45697923]	0.0065691	0.245624	0.154498	FEM
ENSG00000141378.13	0.264695	[0.07378873; 0.45560206]	0.00657625	0.140602	0.27889	FEM
ENSG00000108100.13	-0.263947	[-0.45432468; -0.07357000]	0.00657914	0.0246482	0.426446	FEM
ENSG00000164190.12	0.264304	[0.07362443; 0.45498311]	0.00659188	0.0702268	0.368836	FEM
ENSG00000231247.4	-0.263149	[-0.45328469; -0.07301302]	0.00667478	0	0.776542	FEM
ENSG00000213927.3	0.263044	[0.07290971; 0.45317772]	0.00669611	0	0.802332	FEM
ENSG00000084734.4	0.262702	[0.07276744; 0.45263738]	0.00670987	0	0.916531	FEM
ENSG00000008394.8	0.263789	[0.07300141; 0.45457691]	0.00672918	0.000333916	0.456429	FEM
ENSG00000176476.4	0.262871	[0.07262917; 0.45311285]	0.0067634	0	0.776445	FEM
ENSG00000159885.9	0.263221	[0.07271942; 0.45372238]	0.00676526	0	0.508677	FEM
ENSG00000136010.9	0.262036	[0.07234834; 0.45172284]	0.00677797	0	0.885478	FEM
ENSG00000144908.9	0.264247	[0.07292426; 0.45556887]	0.00678795	0.229114	0.172494	FEM
ENSG00000170627.5	0.262835	[0.07236920; 0.45329986]	0.00683617	0.0229682	0.428538	FEM
ENSG00000115561.10	-0.264501	[-0.45617552; -0.07282570]	0.00683682	0.417644	0.0265385	FEM
ENSG00000130203.5	0.26418	[0.07268034; 0.45567995]	0.00685344	0.296241	0.104703	FEM
ENSG00000185155.7	0.261803	[0.07202262; 0.45158433]	0.00685457	0	0.891366	FEM
ENSG00000183722.7	0.263453	[0.07245797; 0.45444840]	0.00685997	0.258989	0.140517	FEM
ENSG00000205560.8	0.263745	[0.07230876; 0.45518107]	0.00692716	0.273401	0.126085	FEM
ENSG00000117461.10	0.262288	[0.07187572; 0.45270007]	0.00693708	0	0.520056	FEM
ENSG00000268279.2	0.263765	[0.07226183; 0.45526806]	0.00694256	0.24221	0.158156	FEM
ENSG00000116138.8	-0.264031	[-0.45579909; -0.07226366]	0.00696349	0.434952	0.020337	FEM
ENSG00000214513.3	0.26209	[0.07164227; 0.45253804]	0.00699025	0	0.663658	FEM
ENSG00000145244.7	0.262893	[0.07174097; 0.45404485]	0.0070261	0.189261	0.218707	FEM
ENSG00000129355.6	-0.261851	[-0.45229466; -0.07140750]	0.00704078	0	0.460753	FEM
ENSG00000160213.5	0.263176	[0.07175419; 0.45459839]	0.00704516	0.274282	0.125225	FEM
ENSG00000164761.4	0.264076	[0.07190617; 0.45624524]	0.00707285	0.416064	0.0271616	FEM
ENSG00000111843.9	-0.261745	[-0.45258543; -0.07090538]	0.00718329	0.11393	0.312847	FEM
ENSG00000173950.11	-0.261067	[-0.45148213; -0.07065207]	0.00720445	0	0.611578	FEM
ENSG00000134222.12	-0.262149	[-0.45335656; -0.07094178]	0.00720539	0.241902	0.158488	FEM
ENSG00000172663.4	-0.261042	[-0.45147250; -0.07061072]	0.00721494	0.0252749	0.425665	FEM
ENSG00000113924.7	-0.262167	[-0.45350751; -0.07082744]	0.00724162	0.387562	0.0401331	FEM
ENSG00000143486.11	0.260023	[0.07019769; 0.44984775]	0.00725706	0	0.880985	FEM
ENSG00000132824.9	-0.261798	[-0.45337521; -0.07022067]	0.00739709	0.44245	0.0179938	FEM
ENSG00000162654.8	0.261208	[0.06990907; 0.45250629]	0.00744463	0.33954	0.0697259	FEM
ENSG00000101882.5	0.260224	[0.06953110; 0.45091690]	0.00748046	0.1231	0.301128	FEM
ENSG00000167930.11	-0.26048	[-0.45136887; -0.06959078]	0.00748318	0.250406	0.149433	FEM
ENSG00000069966.14	-0.261448	[-0.45306927; -0.06982611]	0.00749042	0.437592	0.019489	FEM
ENSG00000165568.13	-0.260594	[-0.45163558; -0.06955174]	0.00750491	0.0923654	0.340485	FEM
ENSG00000075711.16	-0.262401	[-0.45483956; -0.06996172]	0.00752741	0.4776	0.00950208	FEM
ENSG00000151491.8	0.259369	[0.06911049; 0.44962821]	0.00754098	0	0.599054	FEM
ENSG00000087116.9	0.260182	[0.06928134; 0.45108244]	0.00755535	0.130672	0.291483	FEM
ENSG00000182534.9	-0.260904	[-0.45234158; -0.06946711]	0.00755743	0.340864	0.068778	FEM
ENSG00000164411.6	0.259487	[0.06905704; 0.44991677]	0.00756775	0	0.489478	FEM
ENSG00000179010.10	-0.260022	[-0.45088021; -0.06916311]	0.00757919	0.288957	0.111313	FEM
ENSG00000130222.6	0.259629	[0.06890533; 0.45035195]	0.00762777	0.0445777	0.401437	FEM
ENSG00000177202.1	0.258951	[0.06859300; 0.44930883]	0.00767002	0	0.514319	FEM
ENSG00000067177.10	0.258779	[0.06852735; 0.44903108]	0.00767648	0	0.537696	FEM
ENSG00000268579.1	0.258779	[0.06852735; 0.44903108]	0.00767648	0	0.537696	FEM
ENSG00000171747.4	0.258924	[0.06843850; 0.44940916]	0.0077172	0	0.575273	FEM
ENSG00000007255.6	-0.258379	[-0.44870196; -0.06805655]	0.00779398	0	0.542543	FEM
ENSG00000135245.9	0.258677	[0.06798932; 0.44936441]	0.00784114	0	0.543655	FEM
ENSG00000153406.9	-0.258632	[-0.44945505; -0.06780827]	0.00789617	0.203576	0.201709	FEM
ENSG00000185985.7	0.25864	[0.06777559; 0.44950451]	0.00790755	0.143847	0.274791	FEM
ENSG00000268737.1	0.25864	[0.06777559; 0.44950451]	0.00790755	0.143847	0.274791	FEM
ENSG00000128833.8	0.25748	[0.06742415; 0.44753507]	0.00792308	0	0.874413	FEM
ENSG00000103740.5	-0.258175	[-0.44881110; -0.06753832]	0.00794531	0.00641974	0.448986	FEM
ENSG00000124201.10	0.257302	[0.06728127; 0.44732334]	0.00795479	0	0.665769	FEM
ENSG00000150048.6	0.258703	[0.06741662; 0.44998955]	0.00803065	0.273405	0.12608	FEM
ENSG00000115750.12	0.258574	[0.06733882; 0.44980996]	0.00804525	0.326368	0.0795563	FEM
ENSG00000224689.3	0.258738	[0.06736313; 0.45011377]	0.00805132	0.251353	0.148438	FEM
ENSG00000128989.6	-0.259147	[-0.45084489; -0.06744877]	0.00805814	0.468276	0.0113816	FEM
ENSG00000198598.2	-0.257312	[-0.44769736; -0.06692655]	0.00807297	0	0.584843	FEM
ENSG00000165029.11	0.258341	[0.06714659; 0.44953613]	0.00808878	0.170039	0.242103	FEM
ENSG00000157827.15	0.259453	[0.06734873; 0.45155677]	0.00811743	0.447421	0.0165496	FEM
ENSG00000154479.8	0.257836	[0.06686345; 0.44880790]	0.00813926	0.38207	0.0430198	FEM
ENSG00000111886.9	0.259305	[0.06722320; 0.45138729]	0.00814634	0.41614	0.0271316	FEM
ENSG00000261577.1	0.256792	[0.06651493; 0.44706818]	0.00816532	0	0.712128	FEM
ENSG00000176160.5	0.257108	[0.06634800; 0.44786747]	0.00824896	0.0706733	0.368266	FEM
ENSG00000136147.12	0.256557	[0.06618208; 0.44693254]	0.00825703	0	0.719271	FEM
ENSG00000155858.5	0.257444	[0.06615795; 0.44873039]	0.00834255	0.332509	0.0748827	FEM
ENSG00000204421.2	0.255541	[0.06566333; 0.44541886]	0.00834445	0	0.909914	FEM
ENSG00000228250.2	0.255541	[0.06566333; 0.44541886]	0.00834445	0	0.909914	FEM
ENSG00000228859.2	0.255541	[0.06566333; 0.44541886]	0.00834445	0	0.909914	FEM
ENSG00000235452.2	0.255541	[0.06566333; 0.44541886]	0.00834445	0	0.909914	FEM
ENSG00000236183.2	0.255541	[0.06566333; 0.44541886]	0.00834445	0	0.909914	FEM
ENSG00000268218.1	0.256838	[0.06583988; 0.44783563]	0.00839783	0.173555	0.237781	FEM
ENSG00000112761.14	0.255694	[0.06547855; 0.44591022]	0.00842126	0	0.667853	FEM
ENSG00000214189.4	0.257683	[0.06598629; 0.44938047]	0.0084218	0.307423	0.0949477	FEM
ENSG00000255168.1	-0.25555	[-0.44593676; -0.06516353]	0.00851721	0	0.650312	FEM
ENSG00000172771.7	0.254727	[0.06481871; 0.44463449]	0.00856413	0	0.859373	FEM
ENSG00000151502.6	-0.256318	[-0.44748761; -0.06514853]	0.00859019	0.362932	0.0540799	FEM
ENSG00000167642.8	-0.254718	[-0.44478897; -0.06464635]	0.00862356	0	0.592893	FEM
ENSG00000072422.12	-0.255941	[-0.44702191; -0.06486016]	0.00865729	0.327497	0.0786851	FEM
ENSG00000144381.12	0.258189	[0.06535670; 0.45102076]	0.00868262	0.49828	0.00616529	FEM
ENSG00000206355.7	-0.256753	[-0.44851990; -0.06498706]	0.00868483	0.312854	0.0903876	FEM
ENSG00000157693.10	0.254484	[0.06430979; 0.44465904]	0.00872112	0	0.594816	FEM
ENSG00000228284.3	-0.2554	[-0.44631639; -0.06448422]	0.00874119	0.112429	0.314768	FEM
ENSG00000100376.7	0.25749	[0.06486756; 0.45011285]	0.00879171	0.465142	0.0120708	FEM
ENSG00000183347.13	0.253655	[0.06375363; 0.44355540]	0.00884436	0	0.887078	FEM
ENSG00000100399.11	-0.255691	[-0.44724825; -0.06413341]	0.00889124	0.316812	0.0871378	FEM
ENSG00000007372.16	0.255228	[0.06389203; 0.44656442]	0.00893597	0.337822	0.0709665	FEM
ENSG00000068903.15	-0.254878	[-0.44598266; -0.06377293]	0.00894721	0.207199	0.197473	FEM
ENSG00000114790.8	0.253919	[0.06345709; 0.44437995]	0.0089745	0	0.493114	FEM
ENSG00000136997.10	0.255027	[0.06363424; 0.44641955]	0.00901036	0.255938	0.14366	FEM
ENSG00000125726.6	0.254916	[0.06360329; 0.44622785]	0.0090115	0.183935	0.22513	FEM
ENSG00000240849.6	-0.254628	[-0.44572644; -0.06352971]	0.00901216	0.201188	0.204516	FEM
ENSG00000235696.4	0.253423	[0.06318819; 0.44365792]	0.00902696	0	0.690521	FEM
ENSG00000067141.12	0.25417	[0.06334770; 0.44499310]	0.00903666	0.132584	0.289054	FEM
ENSG00000120992.13	-0.25422	[-0.44514740; -0.06329256]	0.00906107	0.294003	0.106712	FEM
ENSG00000197555.5	0.253228	[0.06299668; 0.44345919]	0.00907885	0	0.62943	FEM
ENSG00000225996.2	0.25358	[0.06294344; 0.44421705]	0.00913014	0	0.51954	FEM
ENSG00000187764.7	-0.254631	[-0.44607252; -0.06318923]	0.00913559	0.246531	0.153533	FEM
ENSG00000146416.12	-0.254301	[-0.44559690; -0.06300602]	0.00917254	0.418695	0.026129	FEM
ENSG00000198860.7	-0.253338	[-0.44391677; -0.06275971]	0.00917535	0.0737121	0.364381	FEM
ENSG00000111087.5	0.255447	[0.06307735; 0.44781586]	0.00924986	0.457235	0.0139438	FEM
ENSG00000185420.14	-0.254519	[-0.44620725; -0.06283140]	0.00925608	0.471186	0.0107681	FEM
ENSG00000150776.13	0.25179	[0.06199637; 0.44158461]	0.00931599	0	0.904043	FEM
ENSG00000262506.2	0.25179	[0.06199637; 0.44158461]	0.00931599	0	0.904043	FEM
ENSG00000163746.7	0.254786	[0.06273169; 0.44684010]	0.0093168	0.38258	0.0427463	FEM
ENSG00000187811.3	0.252644	[0.06219338; 0.44309528]	0.00932089	0	0.574761	FEM
ENSG00000156504.12	-0.253607	[-0.44489200; -0.06232223]	0.0093609	0.347855	0.0638968	FEM
ENSG00000085185.11	0.254141	[0.06244223; 0.44584044]	0.00936507	0.40879	0.0301583	FEM
ENSG00000221963.5	0.254384	[0.06232588; 0.44644296]	0.00943025	0.382238	0.0429295	FEM
ENSG00000004059.6	-0.25267	[-0.44344592; -0.06189464]	0.00943446	0.254853	0.144785	FEM
ENSG00000102981.5	-0.253916	[-0.44565590; -0.06217677]	0.00944305	0.470439	0.0109231	FEM
ENSG00000149591.12	0.251662	[0.06149435; 0.44183030]	0.0094921	0	0.624423	FEM
ENSG00000093010.7	-0.254856	[-0.44746386; -0.06224769]	0.00950214	0.481412	0.00880395	FEM
ENSG00000025434.14	0.25204	[0.06154707; 0.44253247]	0.00950696	0	0.568695	FEM
ENSG00000044459.10	0.251138	[0.06119141; 0.44108512]	0.00955823	0	0.798314	FEM
ENSG00000129116.13	0.253054	[0.06148240; 0.44462529]	0.00962448	0.297757	0.103352	FEM
ENSG00000258653.3	0.251869	[0.06117261; 0.44256513]	0.00963279	0	0.458313	FEM
ENSG00000140104.9	0.250984	[0.06092569; 0.44104302]	0.00964502	0	0.801478	FEM
ENSG00000169684.9	0.250542	[0.06076703; 0.44031786]	0.00966466	0	0.934825	FEM
ENSG00000108823.11	0.250623	[0.06071573; 0.44053118]	0.00969182	0	0.915084	FEM
ENSG00000264708.1	0.251013	[0.06079033; 0.44123635]	0.00969941	0	0.601975	FEM
ENSG00000230514.7	0.252144	[0.06103534; 0.44325229]	0.00971038	0.211166	0.192867	FEM
ENSG00000231268.5	0.252144	[0.06103534; 0.44325229]	0.00971038	0.211166	0.192867	FEM
ENSG00000146453.8	0.250119	[0.06050945; 0.43972786]	0.00972409	0	0.967915	FEM
ENSG00000189030.8	0.252297	[0.06098661; 0.44360746]	0.00974311	0.215287	0.18812	FEM
ENSG00000135424.11	0.250898	[0.06063600; 0.44115952]	0.00974786	0	0.679448	FEM
ENSG00000128040.6	-0.252264	[-0.44360404; -0.06092367]	0.00976409	0.245386	0.154753	FEM
ENSG00000137073.16	0.252664	[0.06098554; 0.44434292]	0.00977739	0.472748	0.0104489	FEM
ENSG00000119684.11	-0.251151	[-0.44173217; -0.06056896]	0.00979709	0.171035	0.240878	FEM
ENSG00000113407.9	0.252914	[0.06098578; 0.44484146]	0.00980029	0.454967	0.0145178	FEM
ENSG00000154258.12	0.251163	[0.06053659; 0.44179030]	0.00981075	0.00293425	0.453254	FEM
ENSG00000095951.12	0.251501	[0.06053127; 0.44247117]	0.00984414	0.249605	0.150277	FEM
ENSG00000198081.6	-0.251804	[-0.44317644; -0.06043199]	0.00991058	0.38109	0.043548	FEM
ENSG00000120669.11	0.249414	[0.05979270; 0.43903471]	0.0099362	0	0.943748	FEM
ENSG00000087053.14	-0.250025	[-0.44021467; -0.05983597]	0.00997656	0	0.755719	FEM
ENSG00000129354.7	-0.252284	[-0.44424622; -0.06032103]	0.00999804	0.430607	0.0217878	FEM
ENSG00000105810.5	-0.252366	[-0.44442763; -0.06030388]	0.0100123	0.377847	0.0453256	FEM
ENSG00000111678.6	-0.251046	[-0.44210361; -0.05998743]	0.0100127	0.305836	0.0963023	FEM
ENSG00000268123.3	-0.251046	[-0.44210361; -0.05998743]	0.0100127	0.305836	0.0963023	FEM
ENSG00000186431.14	-0.25184	[-0.44354393; -0.06013691]	0.0100284	0.343528	0.0668936	FEM
ENSG00000198342.5	0.249064	[0.05946730; 0.43866028]	0.010031	0	0.953086	FEM
ENSG00000101363.8	0.249441	[0.05951567; 0.43936594]	0.0100474	0	0.872538	FEM
ENSG00000168961.12	0.250307	[0.05970267; 0.44091179]	0.0100552	0	0.565418	FEM
ENSG00000182111.8	0.249938	[0.05950635; 0.44036946]	0.0100977	0	0.577986	FEM
ENSG00000260355.1	0.249938	[0.05950635; 0.44036946]	0.0100977	0	0.577986	FEM
ENSG00000152705.6	0.250223	[0.05955520; 0.44088992]	0.0101052	0.06752	0.372293	FEM
ENSG00000184060.6	0.249417	[0.05923357; 0.43959990]	0.0101566	0	0.786182	FEM
ENSG00000173198.4	0.248197	[0.05876840; 0.43762473]	0.0102266	0	0.954845	FEM
ENSG00000132297.7	0.249801	[0.05899718; 0.44060413]	0.0102867	0.103336	0.326416	FEM
ENSG00000139287.8	0.24973	[0.05891866; 0.44054170]	0.0103114	0.103773	0.325856	FEM
ENSG00000149573.4	0.24929	[0.05878298; 0.43979786]	0.0103242	0	0.544662	FEM
ENSG00000080986.8	0.250101	[0.05891752; 0.44128471]	0.0103468	0.32887	0.0776333	FEM
ENSG00000110200.4	-0.249756	[-0.44067926; -0.05883288]	0.0103482	0.242839	0.15748	FEM
ENSG00000143498.13	0.250051	[0.05883308; 0.44126826]	0.0103759	0.228746	0.172904	FEM
ENSG00000204345.1	0.249384	[0.05853248; 0.44023520]	0.0104337	0.0820486	0.35371	FEM
ENSG00000166086.8	-0.249597	[-0.44071907; -0.05847537]	0.0104769	0.267511	0.131899	FEM
ENSG00000177294.6	0.247599	[0.05795351; 0.43724520]	0.0104988	0	0.942481	FEM
ENSG00000269175.1	0.248311	[0.05807577; 0.43854670]	0.0105168	0	0.592846	FEM
ENSG00000164691.12	0.250116	[0.05816016; 0.44207163]	0.0106538	0.459489	0.0133898	FEM
ENSG00000049192.10	0.249183	[0.05791630; 0.44044921]	0.0106647	0.332058	0.075221	FEM
ENSG00000117226.7	0.250107	[0.05811555; 0.44209909]	0.0106711	0.385942	0.0409714	FEM
ENSG00000143942.4	0.248059	[0.05753631; 0.43858184]	0.0107136	0	0.56341	FEM
ENSG00000262028.2	-0.248209	[-0.43901637; -0.05740177]	0.0107834	0.245568	0.154558	FEM
ENSG00000266958.1	0.249003	[0.05745540; 0.44055106]	0.0108371	0.322944	0.0822298	FEM
ENSG00000206380.7	-0.247651	[-0.43827668; -0.05702573]	0.0108861	0.0927338	0.340013	FEM
ENSG00000234728.5	-0.247651	[-0.43827668; -0.05702573]	0.0108861	0.0927338	0.340013	FEM
ENSG00000181039.7	-0.245801	[-0.43506283; -0.05653928]	0.0109114	0	0.993634	FEM
ENSG00000173110.6	0.247472	[0.05691777; 0.43802563]	0.0109139	0	0.548977	FEM
ENSG00000139428.7	-0.247958	[-0.43897019; -0.05694643]	0.0109486	0.193418	0.21373	FEM
ENSG00000100012.7	0.247666	[0.05678968; 0.43854230]	0.0109861	0.0613005	0.380223	FEM
ENSG00000168092.9	-0.247158	[-0.43765648; -0.05665975]	0.0109917	0	0.500221	FEM
ENSG00000180438.10	0.246901	[0.05640442; 0.43739809]	0.0110745	0	0.501903	FEM
ENSG00000135378.3	0.246439	[0.05598292; 0.43689439]	0.0112086	0	0.467765	FEM
ENSG00000147164.7	-0.245631	[-0.43546439; -0.05579709]	0.0112096	0	0.859156	FEM
ENSG00000132182.7	-0.248536	[-0.44064269; -0.05642919]	0.0112214	0.499624	0.00598459	FEM
ENSG00000214193.5	0.24651	[0.05587841; 0.43714086]	0.0112601	0.0499116	0.39469	FEM
ENSG00000180354.11	-0.248724	[-0.44126433; -0.05618459]	0.0113432	0.499184	0.00604321	FEM
ENSG00000182093.10	-0.245738	[-0.43599776; -0.05547923]	0.0113565	0.0919436	0.341026	FEM
ENSG00000221823.6	-0.246411	[-0.43725044; -0.05557178]	0.011382	0.112962	0.314085	FEM
ENSG00000110060.4	0.248285	[0.05596471; 0.44060509]	0.0113947	0.423435	0.024337	FEM
ENSG00000230930.4	-0.246454	[-0.43735828; -0.05554970]	0.0113957	0.0603581	0.381423	FEM
ENSG00000237765.2	-0.246273	[-0.43713703; -0.05540903]	0.0114388	0.311369	0.0916229	FEM
ENSG00000183148.5	0.246599	[0.05543613; 0.43776195]	0.0114587	0.237516	0.163241	FEM
ENSG00000032742.13	-0.24657	[-0.43777051; -0.05537016]	0.0114845	0.34186	0.06807	FEM
ENSG00000143499.9	-0.246809	[-0.43828778; -0.05533080]	0.0115247	0.434489	0.020488	FEM
ENSG00000117400.10	-0.245773	[-0.43650936; -0.05503709]	0.0115514	0.103008	0.326838	FEM
ENSG00000110080.14	-0.245507	[-0.43617506; -0.05483834]	0.0116121	0.144449	0.274032	FEM
ENSG00000204257.10	0.246376	[0.05501530; 0.43773736]	0.0116196	0.234402	0.166647	FEM
ENSG00000128849.9	0.24459	[0.05456968; 0.43460968]	0.0116401	0	0.849003	FEM
ENSG00000129559.8	-0.245346	[-0.43604438; -0.05464693]	0.0116802	0.166142	0.246915	FEM
ENSG00000234114.4	-0.246531	[-0.43816246; -0.05490048]	0.0116849	0.298466	0.102723	FEM
ENSG00000115602.12	0.245095	[0.05449416; 0.43569654]	0.0117229	0.0224219	0.429218	FEM
ENSG00000155849.11	-0.245812	[-0.43699348; -0.05463028]	0.0117331	0.197938	0.208355	FEM
ENSG00000268861.1	-0.245911	[-0.43723396; -0.05458824]	0.0117613	0.334944	0.0730733	FEM
ENSG00000125968.7	-0.245002	[-0.43576920; -0.05423486]	0.0118283	0.28466	0.115307	FEM
ENSG00000206395.4	-0.244832	[-0.43548390; -0.05418076]	0.0118356	0.0280149	0.422246	FEM
ENSG00000010327.6	0.246004	[0.05439468; 0.43761323]	0.0118557	0.319772	0.0847496	FEM
ENSG00000171124.8	0.244522	[0.05405140; 0.43499236]	0.0118626	0.0432118	0.403162	FEM
ENSG00000204267.9	0.244418	[0.05395549; 0.43488125]	0.0118951	0	0.571242	FEM
ENSG00000138293.15	-0.245084	[-0.43616711; -0.05400142]	0.0119401	0.301972	0.0996425	FEM
ENSG00000266412.1	-0.245084	[-0.43616711; -0.05400142]	0.0119401	0.301972	0.0996425	FEM
ENSG00000041988.11	0.244619	[0.05389748; 0.43533978]	0.0119407	0.0424371	0.404139	FEM
ENSG00000133958.9	0.243881	[0.05367348; 0.43408948]	0.0119683	0	0.597317	FEM
ENSG00000114573.5	-0.244534	[-0.43542773; -0.05364097]	0.0120472	0.243395	0.156883	FEM
ENSG00000269048.1	0.245176	[0.05374577; 0.43660601]	0.0120633	0.321032	0.0837441	FEM
ENSG00000105991.7	0.244278	[0.05350229; 0.43505426]	0.0120843	0.0862406	0.348338	FEM
ENSG00000185862.5	0.244124	[0.05334223; 0.43490611]	0.0121413	0.0484089	0.396593	FEM
ENSG00000131116.7	-0.243037	[-0.43300528; -0.05306830]	0.0121578	0	0.582629	FEM
ENSG00000132274.11	0.243927	[0.05323305; 0.43462151]	0.0121712	0.00179978	0.45464	FEM
ENSG00000170153.6	0.244221	[0.05326553; 0.43517720]	0.0121855	0.250582	0.149247	FEM
ENSG00000155959.6	-0.242612	[-0.43236350; -0.05286040]	0.0122102	0	0.917397	FEM
ENSG00000122641.9	0.243081	[0.05294833; 0.43321281]	0.0122166	0	0.626639	FEM
ENSG00000145103.8	0.244374	[0.05322168; 0.43552548]	0.0122204	0.195193	0.211615	FEM
ENSG00000138696.6	0.243817	[0.05309922; 0.43453397]	0.0122209	0.10498	0.324309	FEM
ENSG00000149600.7	-0.243855	[-0.43467072; -0.05303947]	0.0122519	0.214302	0.189251	FEM
ENSG00000134769.17	0.243881	[0.05303037; 0.43473098]	0.0122586	0.11585	0.31039	FEM
ENSG00000151338.14	0.243672	[0.05292212; 0.43442202]	0.0122872	0.181627	0.227927	FEM
ENSG00000142208.11	-0.244122	[-0.43523135; -0.05301196]	0.0122907	0.210012	0.194203	FEM
ENSG00000168452.17	-0.242963	[-0.43318310; -0.05274286]	0.0122987	0	0.528563	FEM
ENSG00000138670.12	0.242143	[0.05251483; 0.43177120]	0.0123217	0	0.962451	FEM
ENSG00000226634.2	-0.243485	[-0.43421813; -0.05275219]	0.0123463	0.0726676	0.365717	FEM
ENSG00000134201.6	-0.242863	[-0.43318116; -0.05254384]	0.01238	0	0.589757	FEM
ENSG00000236236.5	-0.243348	[-0.43414050; -0.05255487]	0.0124231	0.0906556	0.342678	FEM
ENSG00000167220.7	-0.242623	[-0.43292598; -0.05231933]	0.0124595	0.0550419	0.388183	FEM
ENSG00000127838.9	-0.242551	[-0.43283830; -0.05226309]	0.0124783	0	0.516224	FEM
ENSG00000102595.14	0.243267	[0.05239564; 0.43413896]	0.0124884	0.248506	0.151437	FEM
ENSG00000006747.10	0.243155	[0.05218874; 0.43412056]	0.0125728	0.14997	0.267082	FEM
ENSG00000175220.7	-0.242563	[-0.43319963; -0.05192622]	0.0126358	0.109519	0.318494	FEM
ENSG00000168411.9	0.24225	[0.05185642; 0.43264268]	0.0126371	0	0.551931	FEM
ENSG00000129353.10	-0.243173	[-0.43430912; -0.05203661]	0.0126452	0.340098	0.0693256	FEM
ENSG00000112655.11	-0.24273	[-0.43366587; -0.05179478]	0.0127138	0.284664	0.115303	FEM
ENSG00000211452.6	0.241729	[0.05142046; 0.43203795]	0.0127893	0	0.61939	FEM
ENSG00000167562.7	0.243061	[0.05165395; 0.43446818]	0.0128127	0.243935	0.156303	FEM
ENSG00000106991.9	-0.24238	[-0.43356108; -0.05119871]	0.0129591	0.371947	0.0486746	FEM
ENSG00000175602.2	-0.242328	[-0.43362644; -0.05102885]	0.0130344	0.308675	0.0938861	FEM
ENSG00000126247.6	-0.242959	[-0.43490915; -0.05100843]	0.0131071	0.452344	0.0152026	FEM
ENSG00000225824.4	-0.24113	[-0.43164051; -0.05061886]	0.0131098	0	0.466052	FEM
ENSG00000125144.9	0.240482	[0.05037042; 0.43059301]	0.0131638	0	0.757021	FEM
ENSG00000006704.6	0.241582	[0.05055126; 0.43261332]	0.0131876	0.238767	0.161879	FEM
ENSG00000261920.1	0.241582	[0.05055126; 0.43261332]	0.0131876	0.238767	0.161879	FEM
ENSG00000204086.3	0.240531	[0.05026481; 0.43079809]	0.0132197	0	0.579608	FEM
ENSG00000184602.5	-0.240858	[-0.43145002; -0.05026650]	0.0132518	0.200452	0.205384	FEM
ENSG00000065457.6	-0.241146	[-0.43204902; -0.05024341]	0.013292	0.193183	0.214011	FEM
ENSG00000143226.9	0.242822	[0.05053638; 0.43510844]	0.013319	0.427395	0.0229055	FEM
ENSG00000131470.10	0.239244	[0.04976740; 0.42872011]	0.0133308	0	0.977997	FEM
ENSG00000124193.10	-0.241688	[-0.43311857; -0.05025806]	0.0133394	0.47291	0.0104161	FEM
ENSG00000102531.12	0.240926	[0.05003063; 0.43182056]	0.0133727	0.140879	0.278539	FEM
ENSG00000204231.6	-0.243102	[-0.43576845; -0.05043464]	0.0133957	0.484374	0.00828845	FEM
ENSG00000141579.6	0.241736	[0.05006794; 0.43340436]	0.0134361	0.40358	0.0324353	FEM
ENSG00000104517.8	0.240488	[0.04977734; 0.43119945]	0.0134518	0.117712	0.30801	FEM
ENSG00000116017.6	0.241532	[0.04998175; 0.43308261]	0.0134575	0.356305	0.0582749	FEM
ENSG00000268740.1	-0.241865	[-0.43374567; -0.04998343]	0.01349	0.370422	0.0495649	FEM
ENSG00000227057.3	-0.240711	[-0.43168163; -0.04974104]	0.013492	0.111707	0.315691	FEM
ENSG00000182257.5	-0.240601	[-0.43155559; -0.04964701]	0.0135268	0.154211	0.261765	FEM
ENSG00000118257.12	0.240076	[0.04941503; 0.43073655]	0.0135875	0.10622	0.32272	FEM
ENSG00000168002.7	-0.238727	[-0.42844029; -0.04901446]	0.0136483	0	0.817996	FEM
ENSG00000225697.6	0.240455	[0.04936325; 0.43154773]	0.0136513	0.189271	0.218696	FEM
ENSG00000231002.3	0.238608	[0.04893068; 0.42828468]	0.0136777	0	0.95711	FEM
ENSG00000242726.1	0.240159	[0.04915284; 0.43116433]	0.013725	0.150238	0.266746	FEM
ENSG00000072682.14	0.241469	[0.04937914; 0.43355969]	0.0137457	0.421066	0.0252219	FEM
ENSG00000116688.12	-0.239707	[-0.43042581; -0.04898826]	0.0137608	0.11595	0.310262	FEM
ENSG00000173451.2	0.24047	[0.04898789; 0.43195131]	0.0138381	0.288903	0.111364	FEM
ENSG00000166889.13	0.238754	[0.04857746; 0.42893122]	0.0138686	0	0.683731	FEM
ENSG00000166024.9	0.238801	[0.04856513; 0.42903771]	0.0138796	0	0.699728	FEM
ENSG00000178053.13	0.238263	[0.04839978; 0.42812689]	0.0139076	0	0.752343	FEM
ENSG00000142224.11	0.239267	[0.04856228; 0.42997229]	0.0139283	0.164119	0.24942	FEM
ENSG00000138193.10	0.239596	[0.04857042; 0.43062140]	0.0139576	0.2247	0.17743	FEM
ENSG00000258472.4	0.239826	[0.04860289; 0.43104833]	0.0139647	0.322482	0.0825945	FEM
ENSG00000163510.9	0.239922	[0.04861138; 0.43123269]	0.0139702	0.265517	0.133894	FEM
ENSG00000136634.5	0.238671	[0.04835047; 0.42899060]	0.0139739	0	0.635335	FEM
ENSG00000072135.8	-0.239739	[-0.43099109; -0.04848655]	0.0140141	0.317873	0.0862781	FEM
ENSG00000125122.10	-0.239614	[-0.43078883; -0.04843859]	0.0140255	0.315216	0.0884404	FEM
ENSG00000164070.7	0.241131	[0.04872219; 0.43354057]	0.014037	0.469096	0.0112062	FEM
ENSG00000142089.11	0.239903	[0.04843635; 0.43136942]	0.0140559	0.310981	0.0919473	FEM
ENSG00000264162.1	0.239138	[0.04816679; 0.43010971]	0.0141139	0.250643	0.149183	FEM
ENSG00000120370.8	0.240445	[0.04838648; 0.43250258]	0.0141357	0.477905	0.00944459	FEM
ENSG00000151006.7	0.238737	[0.04783425; 0.42963908]	0.0142414	0.289384	0.110921	FEM
ENSG00000115073.6	-0.238457	[-0.42916523; -0.04774949]	0.0142561	0.180306	0.229533	FEM
ENSG00000172493.16	0.238991	[0.04785364; 0.43012817]	0.0142574	0.19686	0.209634	FEM
ENSG00000149554.8	0.238619	[0.04746583; 0.42977122]	0.0144173	0.231852	0.169458	FEM
ENSG00000072042.8	-0.238211	[-0.42913872; -0.04728346]	0.0144693	0.234875	0.166128	FEM
ENSG00000224379.2	-0.237402	[-0.42770828; -0.04709575]	0.0144833	0	0.702388	FEM
ENSG00000072756.12	-0.237802	[-0.42846756; -0.04713551]	0.0145036	0.201025	0.204709	FEM
ENSG00000176024.12	0.237854	[0.04714249; 0.42856586]	0.0145054	0.063496	0.377426	FEM
ENSG00000048052.17	-0.23772	[-0.42841839; -0.04702111]	0.0145543	0.0194779	0.432875	FEM
ENSG00000147724.7	0.238408	[0.04706832; 0.42974804]	0.0146002	0.299047	0.102209	FEM
ENSG00000136052.5	0.237474	[0.04674449; 0.42820432]	0.0146726	0.100472	0.330089	FEM
ENSG00000239779.2	-0.236674	[-0.42676351; -0.04658404]	0.0146741	0	0.598673	FEM
ENSG00000123739.6	-0.236271	[-0.42610379; -0.04643787]	0.014709	0	0.866097	FEM
ENSG00000231555.4	0.238609	[0.04687517; 0.43034253]	0.0147206	0.347839	0.063908	FEM
ENSG00000074603.14	-0.237702	[-0.42871894; -0.04668491]	0.0147268	0.339688	0.0696193	FEM
ENSG00000140464.15	0.237969	[0.04672525; 0.42921257]	0.0147331	0.208037	0.196498	FEM
ENSG00000168026.12	0.237098	[0.04648050; 0.42771482]	0.0147716	0.0707382	0.368183	FEM
ENSG00000166278.10	0.236446	[0.04632139; 0.42657071]	0.0147881	0	0.749526	FEM
ENSG00000077943.7	0.236118	[0.04606296; 0.42617392]	0.0148903	0	0.743809	FEM
ENSG00000111664.6	0.235694	[0.04584595; 0.42554160]	0.0149612	0	0.887844	FEM
ENSG00000268195.1	0.235694	[0.04584595; 0.42554160]	0.0149612	0	0.887844	FEM
ENSG00000228628.4	-0.237976	[-0.42967551; -0.04627587]	0.0149685	0.342002	0.0679692	FEM
ENSG00000259316.3	0.236753	[0.04586173; 0.42764465]	0.0150618	0.221485	0.181057	FEM
ENSG00000215790.2	-0.2373	[-0.42864528; -0.04595460]	0.0150687	0.351055	0.0617319	FEM
ENSG00000083857.9	0.236415	[0.04574992; 0.42708078]	0.0150864	0.155199	0.260529	FEM
ENSG00000182557.3	-0.23693	[-0.42814585; -0.04571466]	0.0151579	0.38421	0.0418797	FEM
ENSG00000166455.9	0.234994	[0.04530855; 0.42467887]	0.0151753	0	0.857749	FEM
ENSG00000134690.6	0.235292	[0.04534721; 0.42523686]	0.0151854	0	0.868509	FEM
ENSG00000135778.7	-0.236453	[-0.42736046; -0.04554488]	0.0151992	0.175258	0.235694	FEM
ENSG00000178115.10	-0.237425	[-0.42914634; -0.04570371]	0.0152143	0.357134	0.05774	FEM
ENSG00000109089.7	-0.237884	[-0.42998771; -0.04577993]	0.0152207	0.431317	0.0215459	FEM
ENSG00000157741.10	0.236267	[0.04542410; 0.42710978]	0.0152446	0.211264	0.192753	FEM
ENSG00000174799.6	0.238041	[0.04574241; 0.43034010]	0.0152567	0.471407	0.0107225	FEM
ENSG00000115109.9	0.236381	[0.04530239; 0.42746051]	0.0153214	0.243165	0.157129	FEM
ENSG00000067606.11	-0.235535	[-0.42594721; -0.04512224]	0.015331	0.0977261	0.33361	FEM
ENSG00000206486.4	0.234904	[0.04494625; 0.42486159]	0.0153608	0	0.788671	FEM
ENSG00000109220.6	0.238212	[0.04556483; 0.43085824]	0.0153684	0.473963	0.0102055	FEM
ENSG00000167380.12	0.235976	[0.04509376; 0.42685773]	0.0153917	0.309533	0.0931622	FEM
ENSG00000213694.3	0.235573	[0.04494525; 0.42620095]	0.0154303	0.0669935	0.372965	FEM
ENSG00000228987.5	-0.235557	[-0.42619942; -0.04491490]	0.015445	0.0522832	0.391684	FEM
ENSG00000188596.5	0.235188	[0.04484097; 0.42553452]	0.0154469	0	0.560897	FEM
ENSG00000142875.15	-0.236752	[-0.42841600; -0.04508744]	0.0154747	0.482296	0.00864762	FEM
ENSG00000167751.8	0.23536	[0.04476529; 0.42595400]	0.0155056	0.0728451	0.36549	FEM
ENSG00000100292.12	0.23715	[0.04501104; 0.42928986]	0.0155566	0.393137	0.0373333	FEM
ENSG00000112742.5	0.236134	[0.04481697; 0.42745137]	0.0155573	0.448616	0.016215	FEM
ENSG00000104064.12	0.237348	[0.04502411; 0.42967246]	0.0155698	0.460375	0.0131766	FEM
ENSG00000186567.8	0.236101	[0.04474634; 0.42745525]	0.0155921	0.235346	0.165611	FEM
ENSG00000134824.9	-0.234256	[-0.42413155; -0.04438054]	0.0156009	0	0.88727	FEM
ENSG00000123427.11	0.235242	[0.04445120; 0.42603195]	0.0156641	0.172718	0.238808	FEM
ENSG00000145882.6	-0.235315	[-0.42617934; -0.04445000]	0.0156723	0.236221	0.164654	FEM
ENSG00000132481.2	0.236581	[0.04467632; 0.42848594]	0.0156793	0.367544	0.0512714	FEM
ENSG00000163694.10	0.236857	[0.04468466; 0.42902907]	0.015703	0.408716	0.0301898	FEM
ENSG00000110719.5	0.235665	[0.04445848; 0.42687170]	0.0157037	0.189432	0.218503	FEM
ENSG00000182326.10	0.236408	[0.04451779; 0.42829724]	0.0157476	0.370238	0.0496728	FEM
ENSG00000269882.1	0.236408	[0.04451779; 0.42829724]	0.0157476	0.370238	0.0496728	FEM
ENSG00000126581.8	-0.234753	[-0.42541777; -0.04408792]	0.0158125	0.293662	0.10702	FEM
ENSG00000188157.9	0.234567	[0.04404922; 0.42508434]	0.0158145	0.0716451	0.367024	FEM
ENSG00000164855.11	0.2361	[0.04433665; 0.42786318]	0.0158148	0.470067	0.011001	FEM
ENSG00000087842.6	0.236397	[0.04430410; 0.42848907]	0.015863	0.487247	0.00781056	FEM
ENSG00000220891.1	0.234189	[0.04379917; 0.42457890]	0.0159133	0	0.512015	FEM
ENSG00000178878.8	-0.234982	[-0.42602021; -0.04394400]	0.0159152	0.227307	0.174509	FEM
ENSG00000088038.13	0.235475	[0.04400716; 0.42694211]	0.0159311	0.284872	0.115108	FEM
ENSG00000272883.1	0.235475	[0.04400716; 0.42694211]	0.0159311	0.284872	0.115108	FEM
ENSG00000273159.1	0.235475	[0.04400716; 0.42694211]	0.0159311	0.284872	0.115108	FEM
ENSG00000273202.1	0.235475	[0.04400716; 0.42694211]	0.0159311	0.284872	0.115108	FEM
ENSG00000273223.1	0.235475	[0.04400716; 0.42694211]	0.0159311	0.284872	0.115108	FEM
ENSG00000273273.1	0.235475	[0.04400716; 0.42694211]	0.0159311	0.284872	0.115108	FEM
ENSG00000273459.1	0.235475	[0.04400716; 0.42694211]	0.0159311	0.284872	0.115108	FEM
ENSG00000094755.12	0.235592	[0.04399938; 0.42718506]	0.0159475	0.359327	0.0563386	FEM
ENSG00000174038.8	0.235507	[0.04387894; 0.42713580]	0.0160051	0.381656	0.0432422	FEM
ENSG00000011052.17	-0.234863	[-0.42596750; -0.04375833]	0.0160054	0.210824	0.193263	FEM
ENSG00000221914.4	0.234324	[0.04361235; 0.42503599]	0.0160307	0.0962119	0.335552	FEM
ENSG00000165392.5	0.233112	[0.04331304; 0.42291113]	0.0160718	0	0.849139	FEM
ENSG00000188868.9	0.234264	[0.04350909; 0.42501967]	0.0160818	0.114057	0.312684	FEM
ENSG00000263046.2	0.234427	[0.04353772; 0.42531529]	0.0160826	0.122249	0.302214	FEM
ENSG00000113810.11	0.234481	[0.04354161; 0.42542016]	0.0160861	0.220466	0.182212	FEM
ENSG00000151150.16	-0.233678	[-0.42412519; -0.04323027]	0.0161766	0	0.585404	FEM
ENSG00000169710.6	-0.233235	[-0.42334819; -0.04312180]	0.0161915	0	0.697418	FEM
ENSG00000228080.5	-0.235668	[-0.42778728; -0.04354901]	0.016204	0.449982	0.0158386	FEM
ENSG00000206427.7	-0.235726	[-0.42792330; -0.04352949]	0.0162208	0.422445	0.024704	FEM
ENSG00000231825.5	-0.235726	[-0.42792330; -0.04352949]	0.0162208	0.422445	0.024704	FEM
ENSG00000185504.12	-0.233289	[-0.42350417; -0.04307411]	0.0162238	0	0.510257	FEM
ENSG00000164123.6	0.233652	[0.04300550; 0.42429856]	0.0162999	0.0716392	0.367032	FEM
ENSG00000187871.2	0.234222	[0.04297899; 0.42546414]	0.0163735	0.270836	0.128602	FEM
ENSG00000156136.5	-0.233222	[-0.42366111; -0.04278236]	0.0163809	0.11354	0.313346	FEM
ENSG00000103227.14	-0.234014	[-0.42513068; -0.04289735]	0.016398	0.266873	0.132536	FEM
ENSG00000168385.13	-0.233413	[-0.42409051; -0.04273459]	0.0164276	0.259517	0.139976	FEM
ENSG00000101546.8	-0.232341	[-0.42233480; -0.04234724]	0.0165363	0	0.757099	FEM
ENSG00000140479.12	-0.233588	[-0.42466245; -0.04251409]	0.0165705	0.248615	0.151322	FEM
ENSG00000226887.3	0.231963	[0.04219934; 0.42172766]	0.0165814	0	0.883842	FEM
ENSG00000198722.8	0.232178	[0.04222642; 0.42213022]	0.0165882	0	0.714375	FEM
ENSG00000131943.13	-0.233544	[-0.42461986; -0.04246874]	0.0165917	0.294334	0.106414	FEM
ENSG00000204364.6	0.232547	[0.04227615; 0.42281840]	0.0165981	0	0.610444	FEM
ENSG00000204620.2	0.234198	[0.04249528; 0.42589989]	0.016644	0.431369	0.0215284	FEM
ENSG00000268786.1	0.234198	[0.04249528; 0.42589989]	0.016644	0.431369	0.0215284	FEM
ENSG00000125551.14	0.233802	[0.04242224; 0.42518242]	0.0166447	0.416747	0.0268909	FEM
ENSG00000082641.11	0.233647	[0.04237551; 0.42491807]	0.0166552	0.306351	0.0958622	FEM
ENSG00000055732.8	0.23408	[0.04236884; 0.42579189]	0.0167037	0.37278	0.0481932	FEM
ENSG00000068137.10	0.232287	[0.04204307; 0.42253131]	0.0167044	0	0.700652	FEM
ENSG00000115339.9	0.234154	[0.04234048; 0.42596675]	0.0167273	0.461128	0.0129972	FEM
ENSG00000104447.7	0.233999	[0.04227900; 0.42571953]	0.0167464	0.456987	0.0140058	FEM
ENSG00000108179.9	-0.232012	[-0.42214348; -0.04188066]	0.016769	0	0.602878	FEM
ENSG00000138698.10	-0.232379	[-0.42291087; -0.04184811]	0.0168258	0	0.510339	FEM
ENSG00000162772.12	0.233757	[0.04207875; 0.42543464]	0.0168357	0.424873	0.0238103	FEM
ENSG00000175582.15	-0.231343	[-0.42104718; -0.04163950]	0.0168385	0	0.836129	FEM
ENSG00000244187.3	-0.23223	[-0.42273052; -0.04173039]	0.0168781	0.0901757	0.343293	FEM
ENSG00000243612.1	0.234435	[0.04200691; 0.42686242]	0.0169465	0.478033	0.00942063	FEM
ENSG00000159792.5	-0.231829	[-0.42217297; -0.04148543]	0.0169781	0.114895	0.311612	FEM
ENSG00000266748.1	-0.232608	[-0.42359413; -0.04162219]	0.0169796	0.2884	0.111828	FEM
ENSG00000172667.6	-0.232847	[-0.42421755; -0.04147671]	0.0170884	0.374931	0.0469625	FEM
ENSG00000162552.10	0.230838	[0.04109008; 0.42058613]	0.0171052	0	0.847282	FEM
ENSG00000188636.3	-0.232997	[-0.42458288; -0.04141142]	0.0171416	0.445725	0.0170328	FEM
ENSG00000162639.11	-0.23106	[-0.42124835; -0.04087087]	0.0172565	0.110663	0.317029	FEM
ENSG00000135747.7	0.230248	[0.04071101; 0.41978593]	0.0172661	0	0.937623	FEM
ENSG00000205777.13	0.231194	[0.04084284; 0.42154529]	0.0172869	0	0.479917	FEM
ENSG00000269663.2	0.231194	[0.04084284; 0.42154529]	0.0172869	0	0.479917	FEM
ENSG00000109771.11	0.231243	[0.04074082; 0.42174519]	0.0173519	0	0.525446	FEM
ENSG00000131351.10	0.230906	[0.04063033; 0.42118106]	0.0173819	0	0.610027	FEM
ENSG00000124532.10	-0.231695	[-0.42264569; -0.04074517]	0.0173961	0.316139	0.0876862	FEM
ENSG00000166833.15	0.23163	[0.04069436; 0.42256502]	0.0174192	0.219459	0.183356	FEM
ENSG00000173262.7	0.232453	[0.04073009; 0.42417611]	0.0174831	0.338872	0.0702066	FEM
ENSG00000142945.8	0.230786	[0.04043116; 0.42114161]	0.0174872	0	0.608833	FEM
ENSG00000138685.8	0.23235	[0.04070318; 0.42399583]	0.0174883	0.38045	0.0438953	FEM
ENSG00000265491.3	-0.231192	[-0.42196104; -0.04042351]	0.0175337	0.161249	0.252984	FEM
ENSG00000138279.11	-0.231324	[-0.42224049; -0.04040827]	0.0175564	0.269938	0.129489	FEM
ENSG00000139289.9	0.232121	[0.04053423; 0.42370843]	0.0175642	0.395995	0.0359481	FEM
ENSG00000198934.3	-0.232764	[-0.42490290; -0.04062464]	0.017577	0.486817	0.00788072	FEM
ENSG00000269654.1	-0.232764	[-0.42490290; -0.04062464]	0.017577	0.486817	0.00788072	FEM
ENSG00000184304.10	0.231488	[0.04038258; 0.42259384]	0.0175885	0.296468	0.1045	FEM
ENSG00000260150.1	-0.231308	[-0.42240557; -0.04020982]	0.0176723	0.19329	0.213883	FEM
ENSG00000206329.11	-0.230802	[-0.42149858; -0.04010468]	0.0176825	0.159092	0.255668	FEM
ENSG00000171791.10	0.23045	[0.03999700; 0.42090290]	0.0177103	0.0050492	0.450666	FEM
ENSG00000154380.12	0.230353	[0.03987900; 0.42082621]	0.0177708	0.0108457	0.443547	FEM
ENSG00000178585.10	-0.230192	[-0.42053499; -0.03984832]	0.0177724	0	0.457698	FEM
ENSG00000122694.11	-0.232376	[-0.42455265; -0.04019861]	0.0177889	0.438129	0.0193195	FEM
ENSG00000177694.10	0.229782	[0.03969095; 0.41987265]	0.0178243	0	0.610241	FEM
ENSG00000136238.13	-0.229443	[-0.41925551; -0.03963140]	0.017825	0	0.843651	FEM
ENSG00000120539.10	0.230134	[0.03970545; 0.42056334]	0.0178522	0.0636735	0.377199	FEM
ENSG00000162989.3	0.230288	[0.03971869; 0.42085796]	0.0178601	0.214125	0.189455	FEM
ENSG00000184992.10	-0.230824	[-0.42184812; -0.03979958]	0.017867	0.145507	0.272698	FEM
ENSG00000124570.13	-0.231208	[-0.42256538; -0.03984997]	0.0178765	0.34655	0.0647925	FEM
ENSG00000256453.1	0.229237	[0.03943620; 0.41903810]	0.0179212	0	0.886291	FEM
ENSG00000084731.9	-0.230491	[-0.42137420; -0.03960793]	0.0179476	0.145176	0.273115	FEM
ENSG00000164406.7	0.230835	[0.03965204; 0.42201778]	0.0179566	0.262725	0.13671	FEM
ENSG00000198858.5	-0.230118	[-0.42078924; -0.03944694]	0.018006	0.211972	0.191936	FEM
ENSG00000125375.10	-0.231029	[-0.42247453; -0.03958364]	0.0180177	0.424627	0.0238996	FEM
ENSG00000198062.10	0.229036	[0.03919010; 0.41888240]	0.0180493	0	0.870338	FEM
ENSG00000226060.3	0.228511	[0.03902124; 0.41800138]	0.0180975	0	0.964439	FEM
ENSG00000228881.3	0.228511	[0.03902124; 0.41800138]	0.0180975	0	0.964439	FEM
ENSG00000179593.11	0.229015	[0.03907524; 0.41895465]	0.0181169	0	0.855318	FEM
ENSG00000104043.10	0.229609	[0.03915256; 0.42006477]	0.0181315	0	0.502005	FEM
ENSG00000137700.12	-0.229553	[-0.42003431; -0.03907179]	0.0181748	0.0564455	0.3864	FEM
ENSG00000116703.12	0.229069	[0.03896663; 0.41917114]	0.0181886	0	0.48227	FEM
ENSG00000075790.6	-0.229563	[-0.42011070; -0.03901433]	0.0182107	0.115141	0.311298	FEM
ENSG00000214900.4	0.22998	[0.03908144; 0.42087836]	0.018213	0.101268	0.329068	FEM
ENSG00000113558.14	-0.229702	[-0.42045141; -0.03895285]	0.0182626	0.213471	0.190208	FEM
ENSG00000143995.15	-0.230368	[-0.42170470; -0.03903209]	0.0182831	0.371024	0.0492123	FEM
ENSG00000105963.9	-0.229357	[-0.41985722; -0.03885716]	0.0182853	0	0.466321	FEM
ENSG00000167107.8	0.229145	[0.03881870; 0.41947112]	0.0182868	0	0.462098	FEM
ENSG00000213920.4	-0.228738	[-0.41873758; -0.03873835]	0.0182938	0	0.594483	FEM
ENSG00000129194.3	0.229187	[0.03876647; 0.41960772]	0.0183231	0.0436262	0.402639	FEM
ENSG00000185236.7	-0.228419	[-0.41823241; -0.03860633]	0.0183417	0	0.705208	FEM
ENSG00000177710.5	0.22868	[0.03864078; 0.41871855]	0.0183475	0	0.807969	FEM
ENSG00000124126.9	-0.228534	[-0.41845724; -0.03861152]	0.0183504	0	0.809263	FEM
ENSG00000056972.14	0.229439	[0.03869602; 0.42018109]	0.0183922	0.0666281	0.373431	FEM
ENSG00000185697.12	-0.230598	[-0.42241898; -0.03877744]	0.0184618	0.476788	0.00965589	FEM
ENSG00000169495.4	0.228458	[0.03841051; 0.41850635]	0.0184662	0	0.740006	FEM
ENSG00000075292.14	0.229088	[0.03846423; 0.41971092]	0.0184982	0.0986695	0.3324	FEM
ENSG00000247121.2	-0.228252	[-0.41818204; -0.03832257]	0.0184991	0	0.787232	FEM
ENSG00000112419.10	0.229541	[0.03838104; 0.42070111]	0.0185962	0.209057	0.195312	FEM
ENSG00000117016.5	-0.229242	[-0.42017022; -0.03831360]	0.0186069	0.273772	0.125722	FEM
ENSG00000072201.9	-0.230706	[-0.42289562; -0.03851609]	0.0186328	0.479013	0.00923863	FEM
ENSG00000185361.4	-0.230177	[-0.42206871; -0.03828623]	0.01872	0.490532	0.00728975	FEM
ENSG00000051180.12	0.230504	[0.03833300; 0.42267541]	0.0187247	0.439928	0.0187594	FEM
ENSG00000156219.12	0.227357	[0.03770581; 0.41700768]	0.0187895	0	0.929346	FEM
ENSG00000143344.11	0.227816	[0.03768579; 0.41794710]	0.0188496	0	0.498911	FEM
ENSG00000147394.14	-0.227554	[-0.41750188; -0.03760582]	0.0188725	0	0.602383	FEM
ENSG00000267825.2	-0.227554	[-0.41750188; -0.03760582]	0.0188725	0	0.602383	FEM
ENSG00000214253.4	-0.228782	[-0.41979914; -0.03776509]	0.0188997	0.229179	0.172422	FEM
ENSG00000144724.14	0.229503	[0.03788334; 0.42112354]	0.0189003	0.380639	0.0437928	FEM
ENSG00000175348.6	-0.228213	[-0.41887036; -0.03755625]	0.0189717	0.27204	0.127417	FEM
ENSG00000156265.11	-0.228561	[-0.41951213; -0.03760940]	0.0189742	0.3484	0.0635254	FEM
ENSG00000233280.2	0.22907	[0.03765059; 0.42049024]	0.0190008	0.380599	0.0438141	FEM
ENSG00000188219.10	0.227127	[0.03724049; 0.41701389]	0.019058	0	0.769645	FEM
ENSG00000148677.6	0.227942	[0.03720107; 0.41868338]	0.019167	0.219413	0.183408	FEM
ENSG00000227816.4	0.22882	[0.03734062; 0.42029980]	0.0191693	0.274111	0.125391	FEM
ENSG00000230705.4	0.22882	[0.03734062; 0.42029980]	0.0191693	0.274111	0.125391	FEM
ENSG00000166343.5	0.22899	[0.03735006; 0.42063033]	0.0191808	0.321727	0.0831918	FEM
ENSG00000116171.12	-0.227687	[-0.41835099; -0.03702360]	0.0192529	0.216965	0.186199	FEM
ENSG00000196400.3	0.22835	[0.03712250; 0.41957663]	0.0192584	0.240983	0.159479	FEM
ENSG00000233841.7	-0.228545	[-0.41994542; -0.03714392]	0.0192649	0.269831	0.129595	FEM
ENSG00000115252.14	0.227522	[0.03687144; 0.41817317]	0.0193324	0.115083	0.311372	FEM
ENSG00000121964.10	-0.228869	[-0.42074409; -0.03699375]	0.0193929	0.378305	0.0450719	FEM
ENSG00000198223.10	0.228582	[0.03689966; 0.42026350]	0.0194231	0.346678	0.0647044	FEM
ENSG00000148604.9	0.227449	[0.03668338; 0.41821531]	0.0194445	0.0810851	0.354945	FEM
ENSG00000178922.12	-0.226751	[-0.41697586; -0.03652701]	0.0194725	0.0229618	0.428546	FEM
ENSG00000104936.13	0.22644	[0.03639715; 0.41648277]	0.0195235	0	0.749604	FEM
ENSG00000231370.5	-0.227066	[-0.41770256; -0.03642875]	0.0195677	0.000912787	0.455723	FEM
ENSG00000186188.6	0.2269	[0.03635651; 0.41744304]	0.0195969	0.107694	0.320832	FEM
ENSG00000241779.1	0.227313	[0.03636655; 0.41826014]	0.019633	0.145182	0.273107	FEM
ENSG00000243009.1	0.227313	[0.03636655; 0.41826014]	0.019633	0.145182	0.273107	FEM
ENSG00000163191.5	0.227707	[0.03626629; 0.41914678]	0.0197375	0.283418	0.116474	FEM
ENSG00000116641.11	0.226889	[0.03611603; 0.41766224]	0.0197504	0.164825	0.248546	FEM
ENSG00000132357.9	0.227412	[0.03617648; 0.41864801]	0.0197651	0.227517	0.174274	FEM
ENSG00000134470.15	0.22824	[0.03626028; 0.42021968]	0.0197958	0.398105	0.0349471	FEM
ENSG00000178297.8	0.226773	[0.03600554; 0.41754131]	0.0198098	0.108246	0.320124	FEM
ENSG00000110693.11	0.227078	[0.03599373; 0.41816232]	0.0198486	0.216172	0.187106	FEM
ENSG00000133863.2	0.224899	[0.03563316; 0.41416424]	0.0198585	0	0.986785	FEM
ENSG00000269866.1	0.225918	[0.03576293; 0.41607293]	0.0198791	0	0.752978	FEM
ENSG00000089050.10	-0.22715	[-0.41834890; -0.03595074]	0.0198837	0.375313	0.046746	FEM
ENSG00000010165.15	0.227032	[0.03592185; 0.41814295]	0.0198904	0.304274	0.0976456	FEM
ENSG00000139410.10	0.225688	[0.03569637; 0.41567877]	0.0198987	0	0.724974	FEM
ENSG00000169607.8	0.227252	[0.03594137; 0.41856312]	0.0199003	0.368526	0.0506849	FEM
ENSG00000185386.10	0.227136	[0.03591395; 0.41835779]	0.0199061	0.346405	0.0648919	FEM
ENSG00000102409.9	-0.225732	[-0.41578325; -0.03568063]	0.0199135	0.000188234	0.456607	FEM
ENSG00000164199.11	0.226162	[0.03565195; 0.41667252]	0.0199763	0.0178412	0.434905	FEM
ENSG00000158526.7	-0.225744	[-0.41591619; -0.03557104]	0.019986	0	0.718799	FEM
ENSG00000121207.7	0.226695	[0.03571919; 0.41767120]	0.0199872	0.161827	0.252265	FEM
ENSG00000239927.1	-0.22594	[-0.41631486; -0.03556537]	0.0200099	0	0.552356	FEM
ENSG00000065526.6	0.226768	[0.03567656; 0.41785862]	0.0200223	0.36236	0.0544345	FEM
ENSG00000105404.6	-0.226399	[-0.41722290; -0.03557605]	0.02005	0.23756	0.163193	FEM
ENSG00000272881.1	-0.226399	[-0.41722290; -0.03557605]	0.02005	0.23756	0.163193	FEM
ENSG00000112038.13	0.225862	[0.03542899; 0.41629434]	0.0200908	0.0383589	0.409277	FEM
ENSG00000006638.7	-0.22571	[-0.41602120; -0.03539840]	0.0200952	0.135018	0.285963	FEM
ENSG00000161671.12	-0.225974	[-0.41654715; -0.03539993]	0.0201213	0.181152	0.228505	FEM
ENSG00000139083.6	0.227296	[0.03558184; 0.41901102]	0.0201377	0.346204	0.0650309	FEM
ENSG00000025039.10	0.22589	[0.03532197; 0.41645832]	0.0201637	0.0615273	0.379934	FEM
ENSG00000067066.12	0.226589	[0.03535776; 0.41782090]	0.0202117	0.242953	0.157357	FEM
ENSG00000254415.3	0.226507	[0.03533696; 0.41767708]	0.0202169	0.198297	0.207931	FEM
ENSG00000140839.7	0.225309	[0.03511461; 0.41550289]	0.0202402	0	0.600306	FEM
ENSG00000229300.5	-0.225622	[-0.41611251; -0.03513238]	0.0202606	0.0657219	0.374587	FEM
ENSG00000141759.10	-0.224855	[-0.41488619; -0.03482409]	0.0203853	0	0.610743	FEM
ENSG00000129187.10	-0.225908	[-0.41684450; -0.03497089]	0.020396	0.192452	0.214884	FEM
ENSG00000171532.4	0.226587	[0.03499645; 0.41817820]	0.0204483	0.473842	0.0102296	FEM
ENSG00000126091.15	-0.224954	[-0.41519640; -0.03471132]	0.0204701	0	0.547234	FEM
ENSG00000225987.3	-0.226034	[-0.41719688; -0.03487198]	0.0204741	0.334649	0.073291	FEM
ENSG00000151136.10	-0.224826	[-0.41496851; -0.03468447]	0.0204749	0	0.504108	FEM
ENSG00000198040.6	0.224979	[0.03469628; 0.41526198]	0.0204826	0	0.612653	FEM
ENSG00000179133.7	0.224975	[0.03469174; 0.41525851]	0.0204852	0	0.50792	FEM
ENSG00000132109.8	0.225485	[0.03463082; 0.41633916]	0.0205776	0.0848125	0.350169	FEM
ENSG00000236609.3	-0.225852	[-0.41703684; -0.03466741]	0.0205907	0.290362	0.110024	FEM
ENSG00000141934.5	-0.226967	[-0.41914623; -0.03478863]	0.0206237	0.418352	0.0262622	FEM
ENSG00000273173.1	-0.225215	[-0.41593035; -0.03449945]	0.0206374	0.282701	0.117149	FEM
ENSG00000111341.5	0.225992	[0.03461589; 0.41736847]	0.0206391	0.329866	0.0768753	FEM
ENSG00000261917.3	-0.225726	[-0.41688961; -0.03456306]	0.0206471	0.211792	0.192144	FEM
ENSG00000262053.3	-0.225726	[-0.41688961; -0.03456306]	0.0206471	0.211792	0.192144	FEM
ENSG00000101745.11	0.225585	[0.03447226; 0.41669770]	0.0206931	0.323773	0.081578	FEM
ENSG00000263156.3	-0.225968	[-0.41750134; -0.03443403]	0.0207573	0.347987	0.0638066	FEM
ENSG00000147010.13	-0.224748	[-0.41531349; -0.03418159]	0.0208018	0.0301057	0.419632	FEM
ENSG00000169851.11	0.224781	[0.03414413; 0.41541836]	0.0208303	0.0395456	0.407783	FEM
ENSG00000156127.6	0.224301	[0.03401388; 0.41458763]	0.0208687	0	0.657475	FEM
ENSG00000173976.11	0.225481	[0.03417617; 0.41678654]	0.0208799	0.312032	0.0910701	FEM
ENSG00000188987.2	0.225238	[0.03394291; 0.41653252]	0.0210115	0.228596	0.173071	FEM
ENSG00000220256.3	0.223463	[0.03366407; 0.41326143]	0.0210192	0	0.746901	FEM
ENSG00000259642.1	-0.225107	[-0.41635704; -0.03385654]	0.0210563	0.259811	0.139676	FEM
ENSG00000204851.5	-0.223189	[-0.41284660; -0.03353155]	0.0210811	0	0.910914	FEM
ENSG00000215504.2	0.224953	[0.03379185; 0.41611344]	0.0210842	0.260754	0.138713	FEM
ENSG00000233948.6	0.224412	[0.03368848; 0.41513470]	0.0210991	0.0595924	0.382397	FEM
ENSG00000138756.13	0.224421	[0.03365913; 0.41518303]	0.0211199	0.111305	0.316206	FEM
ENSG00000153789.8	0.223133	[0.03346403; 0.41280284]	0.0211213	0	0.873566	FEM
ENSG00000205531.8	-0.224113	[-0.41462759; -0.03359890]	0.0211294	0.150784	0.26606	FEM
ENSG00000125730.12	0.224057	[0.03355213; 0.41456128]	0.0211554	0.0190186	0.433445	FEM
ENSG00000114902.9	-0.223247	[-0.41315740; -0.03333629]	0.0212197	0	0.599453	FEM
ENSG00000163507.9	0.223666	[0.03339093; 0.41394066]	0.0212251	0.0880549	0.346012	FEM
ENSG00000102974.10	-0.224085	[-0.41477516; -0.03339519]	0.0212647	0.212446	0.191389	FEM
ENSG00000085552.12	0.223979	[0.03332690; 0.41463147]	0.0213004	0.135884	0.284865	FEM
ENSG00000075624.9	-0.224795	[-0.41619070; -0.03339863]	0.021334	0.389023	0.0393868	FEM
ENSG00000181315.6	0.224436	[0.03327807; 0.41559456]	0.0213798	0.299056	0.102202	FEM
ENSG00000267894.1	0.224436	[0.03327807; 0.41559456]	0.0213798	0.299056	0.102202	FEM
ENSG00000198796.6	0.222447	[0.03297825; 0.41191631]	0.0213832	0	0.951347	FEM
ENSG00000068383.14	-0.224116	[-0.41504271; -0.03318900]	0.0214081	0.236131	0.164753	FEM
ENSG00000249222.1	0.224142	[0.03317581; 0.41510765]	0.0214197	0.155505	0.260146	FEM
ENSG00000171792.6	-0.223346	[-0.41365618; -0.03303569]	0.021435	0	0.538843	FEM
ENSG00000091651.4	0.22311	[0.03297039; 0.41325031]	0.0214559	0	0.65696	FEM
ENSG00000134291.7	-0.223218	[-0.41350516; -0.03293025]	0.0214942	0.148627	0.26877	FEM
ENSG00000265118.1	0.22346	[0.03283229; 0.41408762]	0.0215859	0.107634	0.320909	FEM
ENSG00000167578.12	-0.223463	[-0.41417776; -0.03274782]	0.0216443	0.202252	0.203264	FEM
ENSG00000178690.2	0.224511	[0.03288901; 0.41613285]	0.0216528	0.398619	0.0347058	FEM
ENSG00000175662.13	-0.222297	[-0.41212284; -0.03247156]	0.0217172	0	0.79207	FEM
ENSG00000267993.2	-0.222599	[-0.41271478; -0.03248371]	0.0217393	0	0.675398	FEM
ENSG00000115239.17	0.223792	[0.03261308; 0.41497058]	0.0217701	0.271404	0.128043	FEM
ENSG00000188676.9	0.22306	[0.03250622; 0.41361378]	0.0217702	0.00216697	0.454192	FEM
ENSG00000171681.8	0.222805	[0.03243631; 0.41317318]	0.0217929	0.0194217	0.432945	FEM
ENSG00000150045.7	-0.223646	[-0.41474403; -0.03254706]	0.0218009	0.354597	0.0593865	FEM
ENSG00000196715.5	-0.222321	[-0.41230524; -0.03233652]	0.0218132	0	0.792247	FEM
ENSG00000125827.4	-0.223939	[-0.41531246; -0.03256582]	0.0218174	0.462659	0.0126379	FEM
ENSG00000196166.3	0.222204	[0.03227819; 0.41213045]	0.021842	0	0.715807	FEM
ENSG00000132963.7	0.222926	[0.03233266; 0.41352033]	0.0218769	0.107502	0.321078	FEM
ENSG00000184378.2	0.222898	[0.03229343; 0.41350234]	0.0219013	0	0.486607	FEM
ENSG00000150961.10	0.224806	[0.03248137; 0.41713014]	0.0219622	0.47558	0.00988815	FEM
ENSG00000111785.14	0.222796	[0.03218359; 0.41340903]	0.0219673	0.0864435	0.348078	FEM
ENSG00000120159.7	-0.223192	[-0.41418818; -0.03219491]	0.0219991	0.363595	0.0536703	FEM
ENSG00000166881.5	0.22276	[0.03206965; 0.41345078]	0.022043	0.109242	0.318848	FEM
ENSG00000157456.3	0.221648	[0.03188504; 0.41141084]	0.0220602	0	0.812753	FEM
ENSG00000136213.7	-0.22272	[-0.41341310; -0.03202731]	0.0220685	0.278466	0.12118	FEM
ENSG00000135966.8	-0.221635	[-0.41158319; -0.03168675]	0.022198	0	0.801953	FEM
ENSG00000158457.4	-0.223023	[-0.41416238; -0.03188381]	0.022199	0.246769	0.153279	FEM
ENSG00000166123.9	0.222323	[0.03177371; 0.41287158]	0.0222059	0.183365	0.22582	FEM
ENSG00000131966.9	-0.221519	[-0.41141456; -0.03162420]	0.0222304	0	0.621528	FEM
ENSG00000198589.6	-0.222554	[-0.41335153; -0.03175597]	0.0222415	0.266923	0.132486	FEM
ENSG00000121060.10	0.223821	[0.03189333; 0.41574849]	0.0222718	0.43751	0.0195147	FEM
ENSG00000102755.6	0.22073	[0.03143477; 0.41002548]	0.0222846	0	0.991295	FEM
ENSG00000257923.5	-0.221623	[-0.41168681; -0.03155826]	0.0222871	0	0.712847	FEM
ENSG00000128185.5	-0.2223	[-0.41298624; -0.03161458]	0.0223154	0.187142	0.221257	FEM
ENSG00000204469.8	0.223122	[0.03171189; 0.41453195]	0.0223291	0.277671	0.121944	FEM
ENSG00000130821.11	0.221284	[0.03143644; 0.41113170]	0.0223391	0	0.721797	FEM
ENSG00000268982.1	0.221284	[0.03143644; 0.41113170]	0.0223391	0	0.721797	FEM
ENSG00000173559.8	0.224295	[0.03176645; 0.41682406]	0.0224073	0.485346	0.00812433	FEM
ENSG00000185158.8	0.222482	[0.03145959; 0.41350356]	0.0224425	0.251161	0.14864	FEM
ENSG00000165046.8	0.221743	[0.03132159; 0.41216524]	0.0224663	0	0.587749	FEM
ENSG00000100321.10	-0.221022	[-0.41083630; -0.03120724]	0.0224751	0	0.689902	FEM
ENSG00000148200.12	0.222764	[0.03144538; 0.41408166]	0.0224805	0.386289	0.0407907	FEM
ENSG00000148484.13	-0.221418	[-0.41160423; -0.03123114]	0.0224977	0.0407221	0.406301	FEM
ENSG00000149948.9	0.222145	[0.03132894; 0.41296171]	0.0225011	0.150097	0.266923	FEM
ENSG00000165555.5	0.221898	[0.03124623; 0.41255042]	0.022535	0.0787934	0.357879	FEM
ENSG00000092853.9	0.221339	[0.03111903; 0.41155964]	0.0225694	0	0.52514	FEM
ENSG00000177885.9	-0.221392	[-0.41167070; -0.03111284]	0.0225791	0.0313201	0.418112	FEM
ENSG00000179918.15	-0.221052	[-0.41106401; -0.03104035]	0.0225967	0	0.695874	FEM
ENSG00000170473.12	-0.221169	[-0.41129184; -0.03104657]	0.0226039	0.00148101	0.45503	FEM
ENSG00000115514.7	-0.221531	[-0.41200859; -0.03105369]	0.022635	0.198548	0.207634	FEM
ENSG00000178980.10	-0.220958	[-0.41094990; -0.03096584]	0.0226403	0	0.6306	FEM
ENSG00000100568.6	-0.221203	[-0.41147883; -0.03092724]	0.0226923	0.130464	0.291748	FEM
ENSG00000060971.13	-0.221869	[-0.41286262; -0.03087538]	0.0227954	0.401855	0.0332133	FEM
ENSG00000091073.15	0.220528	[0.03068332; 0.41037223]	0.0227992	0	0.875338	FEM
ENSG00000102109.7	-0.21982	[-0.40907129; -0.03056910]	0.0228106	0	0.994867	FEM
ENSG00000175356.8	0.220585	[0.03064761; 0.41052208]	0.0228305	0	0.662524	FEM
ENSG00000170430.9	-0.222156	[-0.41344963; -0.03086190]	0.0228334	0.335952	0.0723313	FEM
ENSG00000137441.7	-0.221152	[-0.41161126; -0.03069339]	0.0228542	0.194419	0.212536	FEM
ENSG00000167112.7	-0.220157	[-0.40997097; -0.03034226]	0.0230075	0	0.827512	FEM
ENSG00000001036.9	-0.22234	[-0.41403853; -0.03064199]	0.0230083	0.377922	0.0452842	FEM
ENSG00000157992.8	0.222096	[0.03057276; 0.41362018]	0.0230338	0.306082	0.0960921	FEM
ENSG00000204103.2	0.222942	[0.03064294; 0.41524176]	0.0230668	0.437721	0.0194482	FEM
ENSG00000187474.4	0.220756	[0.03031628; 0.41119483]	0.0230856	0	0.508258	FEM
ENSG00000113302.4	0.220327	[0.03023020; 0.41042453]	0.0231053	0	0.658066	FEM
ENSG00000244165.1	0.22175	[0.03041689; 0.41308278]	0.0231114	0.266307	0.133102	FEM
ENSG00000106344.4	0.220444	[0.03021546; 0.41067305]	0.0231275	0	0.565327	FEM
ENSG00000179776.13	-0.222372	[-0.41428229; -0.03046091]	0.0231409	0.484224	0.00831406	FEM
ENSG00000156381.4	-0.221571	[-0.41279507; -0.03034667]	0.0231442	0.308136	0.0943423	FEM
ENSG00000141030.8	-0.220602	[-0.41101631; -0.03018810]	0.0231629	0.0965682	0.335095	FEM
ENSG00000079112.5	0.220471	[0.03016327; 0.41077856]	0.0231679	0	0.500121	FEM
ENSG00000183134.4	-0.22305	[-0.41560263; -0.03049754]	0.0231812	0.46953	0.0111141	FEM
ENSG00000113249.8	0.221105	[0.03022031; 0.41199068]	0.0231893	0.166783	0.246122	FEM
ENSG00000234096.5	-0.220647	[-0.41114795; -0.03014511]	0.0231984	0	0.527556	FEM
ENSG00000160218.8	-0.220611	[-0.41111097; -0.03011038]	0.0232199	0.1606	0.253791	FEM
ENSG00000139351.10	0.220787	[0.03008075; 0.41149303]	0.0232587	0.112336	0.314887	FEM
ENSG00000112343.8	0.220429	[0.02999063; 0.41086792]	0.0232887	0	0.497964	FEM
ENSG00000131389.12	-0.221367	[-0.41269509; -0.03003891]	0.023346	0.331238	0.0758369	FEM
ENSG00000235307.5	-0.221699	[-0.41335957; -0.03003842]	0.0233789	0.352402	0.0608336	FEM
ENSG00000115993.7	-0.221535	[-0.41305805; -0.03001131]	0.0233824	0.301834	0.0997632	FEM
ENSG00000131778.13	-0.222034	[-0.41410671; -0.02996216]	0.0234668	0.434684	0.0204244	FEM
ENSG00000159674.7	-0.220922	[-0.41206182; -0.02978311]	0.0234878	0.368677	0.0505951	FEM
ENSG00000266741.1	-0.219989	[-0.41037464; -0.02960335]	0.0235272	0.0736611	0.364447	FEM
ENSG00000003400.10	0.222003	[0.02987317; 0.41413323]	0.0235281	0.499531	0.00599691	FEM
ENSG00000146859.6	0.219982	[0.02936667; 0.41059781]	0.0236997	0.0598619	0.382054	FEM
ENSG00000182010.6	0.220385	[0.02941376; 0.41135704]	0.0237047	0.401424	0.0334095	FEM
ENSG00000234284.2	0.22117	[0.02949811; 0.41284237]	0.0237196	0.443097	0.017801	FEM
ENSG00000139433.5	-0.221138	[-0.41299207; -0.02928440]	0.0238726	0.427526	0.0228592	FEM
ENSG00000120915.9	-0.220794	[-0.41239081; -0.02919775]	0.0239028	0.459422	0.0134061	FEM
ENSG00000124171.4	0.220885	[0.02919632; 0.41257390]	0.0239127	0.395515	0.0361782	FEM
ENSG00000179873.10	0.218766	[0.02889764; 0.40863349]	0.0239264	0	0.839457	FEM
ENSG00000134308.9	-0.220709	[-0.41227464; -0.02914296]	0.0239347	0.433662	0.0207604	FEM
ENSG00000170370.10	0.21888	[0.02876019; 0.40900076]	0.0240396	0	0.683044	FEM
ENSG00000137166.10	0.220293	[0.02891105; 0.41167523]	0.0240652	0.400988	0.0336089	FEM
ENSG00000269783.1	0.219864	[0.02884743; 0.41087997]	0.0240706	0.194771	0.212118	FEM
ENSG00000113318.9	-0.220218	[-0.41154743; -0.02888926]	0.0240741	0.407429	0.0307425	FEM
ENSG00000205403.8	0.220076	[0.02886757; 0.41128413]	0.0240763	0.260892	0.138572	FEM
ENSG00000100075.5	-0.219053	[-0.40942587; -0.02867927]	0.0241164	0	0.483648	FEM
ENSG00000268928.1	-0.219053	[-0.40942587; -0.02867927]	0.0241164	0	0.483648	FEM
ENSG00000105258.4	-0.219513	[-0.41029133; -0.02873407]	0.0241205	0.137073	0.283357	FEM
ENSG00000157315.4	0.218391	[0.02855011; 0.40823262]	0.0241482	0	0.81028	FEM
ENSG00000158636.12	0.219058	[0.02846788; 0.40964732]	0.0242743	0.170986	0.240938	FEM
ENSG00000212719.6	0.218534	[0.02839607; 0.40867223]	0.0242771	0	0.634133	FEM
ENSG00000099282.5	-0.220611	[-0.41261640; -0.02860620]	0.0243214	0.427226	0.0229654	FEM
ENSG00000025708.8	0.219913	[0.02848127; 0.41134414]	0.0243469	0.376444	0.0461088	FEM
ENSG00000057657.10	0.220836	[0.02857052; 0.41310062]	0.0243694	0.455022	0.0145038	FEM
ENSG00000166825.9	-0.218828	[-0.40945326; -0.02820289]	0.0244502	0.0480722	0.397019	FEM
ENSG00000160813.2	-0.219171	[-0.41010514; -0.02823631]	0.0244582	0.321075	0.0837095	FEM
ENSG00000116830.7	0.219071	[0.02821587; 0.40992660]	0.0244639	0.204933	0.20012	FEM
ENSG00000183091.15	0.218092	[0.02804283; 0.40814177]	0.0244992	0	0.658383	FEM
ENSG00000156218.8	0.218351	[0.02806921; 0.40863300]	0.0245044	0.0149096	0.438533	FEM
ENSG00000137693.9	0.219592	[0.02821592; 0.41096732]	0.024514	0.298642	0.102567	FEM
ENSG00000127540.7	-0.218961	[-0.40981115; -0.02811141]	0.0245316	0.277318	0.122284	FEM
ENSG00000017427.11	0.218191	[0.02799667; 0.40838494]	0.0245435	0	0.556723	FEM
ENSG00000178573.6	0.219629	[0.02812726; 0.41113162]	0.0245839	0.429981	0.0220028	FEM
ENSG00000161813.16	0.220153	[0.02813288; 0.41217279]	0.0246298	0.432716	0.0210748	FEM
ENSG00000173530.5	0.220473	[0.02815693; 0.41278908]	0.0246424	0.468232	0.0113912	FEM
ENSG00000080802.14	0.219593	[0.02801038; 0.41117484]	0.024668	0.364827	0.0529145	FEM
ENSG00000214274.5	0.220072	[0.02795726; 0.41218676]	0.0247536	0.423806	0.0242002	FEM
ENSG00000157014.6	-0.217975	[-0.40825841; -0.02769078]	0.0247536	0	0.58887	FEM
ENSG00000161929.10	0.219352	[0.02780543; 0.41089765]	0.024799	0.364278	0.0532507	FEM
ENSG00000057468.6	0.217964	[0.02762457; 0.40830366]	0.0248028	0	0.585149	FEM
ENSG00000206455.4	-0.218642	[-0.40960951; -0.02767477]	0.0248298	0.23824	0.162452	FEM
ENSG00000234674.2	-0.218642	[-0.40960951; -0.02767477]	0.0248298	0.23824	0.162452	FEM
ENSG00000140961.8	0.219198	[0.02773087; 0.41066426]	0.0248405	0.360208	0.0557816	FEM
ENSG00000244482.5	0.217716	[0.02752145; 0.40791079]	0.0248572	0	0.684361	FEM
ENSG00000185115.4	-0.218194	[-0.40885264; -0.02753497]	0.0248927	0.287664	0.112508	FEM
ENSG00000197956.5	0.219312	[0.02766446; 0.41095894]	0.0249015	0.324725	0.0808333	FEM
ENSG00000198417.5	0.216635	[0.02727866; 0.40599202]	0.0249383	0	0.980742	FEM
ENSG00000249860.2	0.21839	[0.02731616; 0.40946398]	0.0250777	0.241876	0.158516	FEM
ENSG00000166986.8	0.218628	[0.02727384; 0.40998266]	0.0251325	0.342198	0.0678309	FEM
ENSG00000184828.5	0.217344	[0.02711148; 0.40757750]	0.0251342	0	0.490336	FEM
ENSG00000102710.15	0.217837	[0.02710744; 0.40856673]	0.0251842	0.131649	0.290242	FEM
ENSG00000075391.12	0.218036	[0.02709331; 0.40897777]	0.0252139	0.317033	0.0869587	FEM
ENSG00000171476.17	-0.21843	[-0.40976837; -0.02709117]	0.0252529	0.347151	0.0643792	FEM
ENSG00000158406.2	0.217314	[0.02684152; 0.40778731]	0.0253384	0	0.511227	FEM
ENSG00000180626.9	0.218351	[0.02694376; 0.40975764]	0.0253581	0.339813	0.0695299	FEM
ENSG00000152291.9	-0.217287	[-0.40779048; -0.02678424]	0.0253799	0.174193	0.236998	FEM
ENSG00000167130.13	-0.217787	[-0.40873742; -0.02683683]	0.0253868	0.202171	0.203359	FEM
ENSG00000128567.12	0.216665	[0.02668064; 0.40664905]	0.0254006	0	0.565734	FEM
ENSG00000095321.12	-0.216826	[-0.40695512; -0.02669681]	0.0254035	0	0.61436	FEM
ENSG00000147509.9	0.218688	[0.02692501; 0.41045067]	0.0254043	0.44042	0.0186084	FEM
ENSG00000113231.9	0.216689	[0.02657651; 0.40680213]	0.0254834	0	0.475606	FEM
ENSG00000132388.8	-0.216024	[-0.40559499; -0.02645337]	0.0255156	0	0.881873	FEM
ENSG00000165675.12	-0.216949	[-0.40733342; -0.02656555]	0.0255165	0	0.557249	FEM
ENSG00000130005.7	-0.217074	[-0.40766350; -0.02648364]	0.0255916	0.15438	0.261553	FEM
ENSG00000146963.13	-0.21801	[-0.40951335; -0.02650630]	0.0256621	0.387175	0.0403325	FEM
ENSG00000206502.4	0.216854	[0.02633663; 0.40737150]	0.0256848	0	0.47958	FEM
ENSG00000146411.5	0.216459	[0.02621645; 0.40670137]	0.0257409	0	0.491432	FEM
ENSG00000073009.8	-0.2162	[-0.40623143; -0.02616851]	0.0257538	0	0.490461	FEM
ENSG00000127241.12	0.216968	[0.02617823; 0.40775729]	0.0258185	0.0855735	0.349193	FEM
ENSG00000127125.7	-0.216533	[-0.40700747; -0.02605760]	0.0258716	0.246296	0.153783	FEM
ENSG00000138675.12	0.216897	[0.02604342; 0.40774959]	0.0259167	0.157439	0.25773	FEM
ENSG00000107779.7	0.216858	[0.02601646; 0.40770002]	0.0259341	0.127744	0.295209	FEM
ENSG00000187079.10	0.216358	[0.02588177; 0.40683331]	0.0259925	0.0780835	0.358788	FEM
ENSG00000072121.11	0.215325	[0.02574946; 0.40489972]	0.0259994	0	0.918714	FEM
ENSG00000197050.6	0.216218	[0.02583709; 0.40659967]	0.0260144	0.114418	0.312223	FEM
ENSG00000181409.7	-0.218041	[-0.41002828; -0.02605442]	0.0260148	0.447285	0.016588	FEM
ENSG00000101624.6	0.216424	[0.02583757; 0.40701001]	0.0260333	0.0178813	0.434855	FEM
ENSG00000197714.4	0.216938	[0.02589001; 0.40798628]	0.0260403	0.206296	0.198526	FEM
ENSG00000269041.2	-0.215784	[-0.40588643; -0.02568159]	0.0260958	0	0.579565	FEM
ENSG00000178445.8	0.21637	[0.02575055; 0.40698920]	0.0260964	0.106826	0.321943	FEM
ENSG00000164164.11	0.216087	[0.02559943; 0.40657466]	0.0261887	0.0417306	0.40503	FEM
ENSG00000240720.3	0.215921	[0.02551499; 0.40632783]	0.0262397	0.0895899	0.344044	FEM
ENSG00000066322.8	-0.217884	[-0.41004273; -0.02572494]	0.0262568	0.423278	0.024395	FEM
ENSG00000101977.15	0.216475	[0.02545206; 0.40749871]	0.0263407	0.287284	0.11286	FEM
ENSG00000101916.11	0.21621	[0.02541453; 0.40700542]	0.0263457	0.183887	0.225187	FEM
ENSG00000107140.11	0.216702	[0.02545383; 0.40794948]	0.0263602	0.367098	0.051539	FEM
ENSG00000023697.8	-0.215603	[-0.40605889; -0.02514801]	0.0265002	0.0954093	0.336581	FEM
ENSG00000151632.12	0.216562	[0.02520199; 0.40792180]	0.0265459	0.369932	0.0498529	FEM
ENSG00000004799.7	0.215369	[0.02505821; 0.40568075]	0.0265499	0	0.527517	FEM
ENSG00000187987.5	0.216045	[0.02513255; 0.40695834]	0.0265533	0.27423	0.125276	FEM
ENSG00000144579.3	-0.215349	[-0.40569385; -0.02500355]	0.0265914	0.106373	0.322524	FEM
ENSG00000131845.10	0.21501	[0.02494987; 0.40507000]	0.0266028	0	0.513112	FEM
ENSG00000104331.4	-0.214416	[-0.40402303; -0.02480956]	0.0266599	0	0.944947	FEM
ENSG00000134830.3	0.21456	[0.02481127; 0.40430909]	0.0266719	0	0.899816	FEM
ENSG00000185453.8	-0.215097	[-0.40535225; -0.02484243]	0.0266966	0	0.616567	FEM
ENSG00000215529.8	0.214321	[0.02468571; 0.40395578]	0.0267503	0	0.893403	FEM
ENSG00000166557.8	-0.215185	[-0.40559515; -0.02477488]	0.0267586	0.0457775	0.399921	FEM
ENSG00000007866.14	0.215301	[0.02472778; 0.40587411]	0.0268068	0.129488	0.292989	FEM
ENSG00000197119.8	0.214648	[0.02457680; 0.40472003]	0.0268678	0	0.566239	FEM
ENSG00000095397.9	0.214744	[0.02454828; 0.40493885]	0.0268994	0	0.669029	FEM
ENSG00000179364.9	-0.216654	[-0.40862948; -0.02467788]	0.02697	0.480609	0.00894768	FEM
ENSG00000271374.1	-0.216654	[-0.40862948; -0.02467788]	0.02697	0.480609	0.00894768	FEM
ENSG00000100116.12	0.214034	[0.02437259; 0.40369548]	0.0269756	0	0.863305	FEM
ENSG00000129038.11	-0.216086	[-0.40761285; -0.02455942]	0.027013	0.361576	0.0549227	FEM
ENSG00000081377.12	-0.214942	[-0.40553133; -0.02435224]	0.027075	0.271566	0.127883	FEM
ENSG00000137409.14	-0.215114	[-0.40586745; -0.02436055]	0.027084	0.173473	0.237882	FEM
ENSG00000175820.2	0.215995	[0.02443225; 0.40755766]	0.0271064	0.352677	0.0606516	FEM
ENSG00000103502.9	-0.215143	[-0.40595435; -0.02433198]	0.0271096	0.249475	0.150414	FEM
ENSG00000198176.8	-0.215458	[-0.40656434; -0.02435074]	0.0271231	0.358932	0.0565894	FEM
ENSG00000264872.3	-0.214679	[-0.40513713; -0.02422086]	0.0271568	0.0042036	0.451702	FEM
ENSG00000115183.9	0.214135	[0.02411757; 0.40415160]	0.0271907	0	0.607672	FEM
ENSG00000115170.9	-0.21576	[-0.40723646; -0.02428395]	0.0272041	0.338381	0.0705617	FEM
ENSG00000076770.10	-0.214974	[-0.40580615; -0.02414157]	0.0272475	0.292125	0.108414	FEM
ENSG00000213366.8	-0.215045	[-0.40597125; -0.02411897]	0.0272722	0.378059	0.0452084	FEM
ENSG00000173660.7	-0.214883	[-0.40584059; -0.02392619]	0.0274134	0.370297	0.0496382	FEM
ENSG00000144369.8	0.214506	[0.02383805; 0.40517494]	0.0274508	0.217194	0.185937	FEM
ENSG00000034677.7	0.214935	[0.02388019; 0.40599025]	0.0274553	0.224206	0.177986	FEM
ENSG00000088832.10	-0.213383	[-0.40309796; -0.02366790]	0.0274878	0	0.729353	FEM
ENSG00000153140.4	0.214528	[0.02364340; 0.40541287]	0.027611	0.280844	0.118909	FEM
ENSG00000093072.11	0.213575	[0.02351963; 0.40363057]	0.0276263	0	0.752261	FEM
ENSG00000125046.10	0.213262	[0.02342414; 0.40309981]	0.0276763	0	0.675975	FEM
ENSG00000136630.11	0.215462	[0.02365975; 0.40726435]	0.0276812	0.394222	0.0368033	FEM
ENSG00000241973.6	-0.214023	[-0.40454781; -0.02349919]	0.0276833	0.0715626	0.367129	FEM
ENSG00000161640.11	0.214312	[0.02343708; 0.40518634]	0.0277598	0.226628	0.175268	FEM
ENSG00000111907.16	0.214247	[0.02335892; 0.40513432]	0.0278179	0.188688	0.219397	FEM
ENSG00000137507.7	-0.214224	[-0.40509206; -0.02335630]	0.027818	0.213548	0.190119	FEM
ENSG00000196876.9	0.21494	[0.02335670; 0.40652271]	0.0278813	0.398651	0.0346909	FEM
ENSG00000149257.9	0.214745	[0.02331607; 0.40617332]	0.0278972	0.301327	0.100206	FEM
ENSG00000171860.4	0.213532	[0.02316279; 0.40390089]	0.027915	0	0.579056	FEM
ENSG00000102524.7	0.213793	[0.02314306; 0.40444241]	0.0279544	0.0695173	0.369743	FEM
ENSG00000240592.1	0.214042	[0.02315636; 0.40492846]	0.0279657	0.241625	0.158787	FEM
ENSG00000189007.11	-0.213645	[-0.40420857; -0.02308072]	0.0279925	0.120013	0.30507	FEM
ENSG00000116667.8	-0.213957	[-0.40480505; -0.02310926]	0.0279968	0.200583	0.205229	FEM
ENSG00000130589.12	0.213951	[0.02310685; 0.40479473]	0.0279982	0.158551	0.256343	FEM
ENSG00000134815.14	0.213203	[0.02301586; 0.40338936]	0.0280066	0	0.635383	FEM
ENSG00000143669.9	0.213639	[0.02306213; 0.40421582]	0.0280073	0.0145358	0.438995	FEM
ENSG00000180834.3	-0.214174	[-0.40523376; -0.02311517]	0.0280112	0.171296	0.240556	FEM
ENSG00000154102.6	-0.213092	[-0.40320314; -0.02298141]	0.0280252	0	0.566824	FEM
ENSG00000168259.10	0.214987	[0.02318156; 0.40679299]	0.0280287	0.426383	0.0232654	FEM
ENSG00000185561.8	0.213829	[0.02303486; 0.40462285]	0.0280466	0.120074	0.304992	FEM
ENSG00000134802.13	0.213698	[0.02299496; 0.40440131]	0.0280679	0.209112	0.195248	FEM
ENSG00000183496.5	0.214165	[0.02303754; 0.40529151]	0.0280741	0.324207	0.0812377	FEM
ENSG00000055208.13	0.213418	[0.02294219; 0.40389432]	0.0280866	0.0266258	0.423981	FEM
ENSG00000186480.8	-0.213498	[-0.40404465; -0.02295039]	0.0280868	0.0763761	0.360974	FEM
ENSG00000117139.12	0.213484	[0.02294103; 0.40402615]	0.0280933	0.196917	0.209567	FEM
ENSG00000196081.5	0.214401	[0.02303392; 0.40576835]	0.028098	0.277103	0.122491	FEM
ENSG00000154783.6	0.212232	[0.02275954; 0.40170492]	0.0281323	0	0.965691	FEM
ENSG00000213901.6	0.214669	[0.02298950; 0.40634814]	0.0281581	0.394845	0.0365014	FEM
ENSG00000158683.3	0.213874	[0.02290350; 0.40484424]	0.0281588	0.30766	0.0947464	FEM
ENSG00000120889.8	0.213325	[0.02276546; 0.40388525]	0.0282244	0.0223397	0.42932	FEM
ENSG00000145982.7	-0.213521	[-0.40430586; -0.02273643]	0.0282657	0.273191	0.126289	FEM
ENSG00000167992.8	0.21375	[0.02270325; 0.40479719]	0.0283133	0.268334	0.13108	FEM
ENSG00000152061.17	-0.213912	[-0.40511260; -0.02271093]	0.0283211	0.448992	0.0161108	FEM
ENSG00000185222.7	0.214181	[0.02271817; 0.40564374]	0.0283387	0.32952	0.077138	FEM
ENSG00000131981.11	0.21451	[0.02273993; 0.40628088]	0.0283496	0.390573	0.038605	FEM
ENSG00000102893.11	-0.213854	[-0.40506622; -0.02264264]	0.0283725	0.337836	0.0709568	FEM
ENSG00000124508.12	0.214645	[0.02271555; 0.40657376]	0.0283814	0.452818	0.0150771	FEM
ENSG00000163689.14	0.213524	[0.02259073; 0.40445825]	0.0283866	0.286999	0.113125	FEM
ENSG00000076382.12	0.21269	[0.02246276; 0.40291776]	0.0284197	0.0462193	0.399363	FEM
ENSG00000053108.12	-0.213107	[-0.40381459; -0.02239969]	0.0285088	0.166734	0.246182	FEM
ENSG00000122779.12	0.212123	[0.02227621; 0.40197023]	0.0285256	0	0.770074	FEM
ENSG00000100583.4	0.213636	[0.02238742; 0.40488542]	0.0285652	0.274004	0.125496	FEM
ENSG00000123159.11	-0.212505	[-0.40281263; -0.02219689]	0.0286253	0.0608452	0.380803	FEM
ENSG00000128965.7	0.212708	[0.02218201; 0.40323465]	0.0286556	0.100268	0.33035	FEM
ENSG00000053770.7	-0.212624	[-0.40310524; -0.02214183]	0.0286818	0.204027	0.20118	FEM
ENSG00000141580.11	-0.211813	[-0.40160579; -0.02201963]	0.0287135	0	0.819524	FEM
ENSG00000146966.8	-0.212638	[-0.40318636; -0.02208991]	0.0287265	0	0.466565	FEM
ENSG00000104835.10	-0.212488	[-0.40293717; -0.02203968]	0.0287556	0.152138	0.264362	FEM
ENSG00000196935.4	0.214046	[0.02216310; 0.40592939]	0.0287874	0.405497	0.0315848	FEM
ENSG00000148154.5	0.213687	[0.02211435; 0.40525994]	0.028797	0.335926	0.0723507	FEM
ENSG00000148832.10	-0.211875	[-0.40190121; -0.02184890]	0.0288626	0	0.657142	FEM
ENSG00000267884.1	0.211879	[0.02183743; 0.40192129]	0.0288727	0	0.665452	FEM
ENSG00000269554.1	-0.21196	[-0.40208539; -0.02183531]	0.0288815	0	0.671727	FEM
ENSG00000111224.9	0.212194	[0.02170933; 0.40267902]	0.0290079	0	0.457284	FEM
ENSG00000187801.10	0.21255	[0.02173740; 0.40336270]	0.0290149	0.196744	0.209772	FEM
ENSG00000143630.5	0.212637	[0.02173481; 0.40353902]	0.0290246	0.166669	0.246264	FEM
ENSG00000263324.1	0.212637	[0.02173481; 0.40353902]	0.0290246	0.166669	0.246264	FEM
ENSG00000197226.8	-0.21137	[-0.40120557; -0.02153497]	0.0290842	0	0.826636	FEM
ENSG00000121851.8	-0.211973	[-0.40241083; -0.02153449]	0.0291365	0.116944	0.308991	FEM
ENSG00000070413.14	-0.211008	[-0.40061600; -0.02140015]	0.0291674	0	0.779026	FEM
ENSG00000103266.6	-0.211992	[-0.40265637; -0.02132733]	0.0293137	0.219286	0.183553	FEM
ENSG00000213977.3	-0.21249	[-0.40375580; -0.02122354]	0.0294442	0.397206	0.0353711	FEM
ENSG00000132286.7	-0.212593	[-0.40396212; -0.02122433]	0.0294523	0.37341	0.0478304	FEM
ENSG00000214645.3	0.211235	[0.02108696; 0.40138343]	0.0294538	0	0.552969	FEM
ENSG00000091986.11	0.2125	[0.02114026; 0.40386014]	0.0295158	0.335227	0.0728648	FEM
ENSG00000165669.9	-0.211342	[-0.40167857; -0.02100521]	0.0295327	0.171201	0.240673	FEM
ENSG00000116514.12	0.211401	[0.02099920; 0.40180185]	0.0295428	0	0.484613	FEM
ENSG00000164168.3	0.211193	[0.02094032; 0.40144599]	0.0295755	0.0236156	0.427732	FEM
ENSG00000236699.4	0.211381	[0.02092257; 0.40184038]	0.0296067	0.0403501	0.40677	FEM
ENSG00000124333.10	-0.211241	[-0.40162342; -0.02085811]	0.02965	0.153032	0.263241	FEM
ENSG00000115310.13	-0.210852	[-0.40095580; -0.02074895]	0.0297107	0	0.604902	FEM
ENSG00000167968.8	0.211352	[0.02077882; 0.40192462]	0.0297273	0.107421	0.321182	FEM
ENSG00000087191.8	-0.210868	[-0.40102919; -0.02070649]	0.0297485	0	0.520435	FEM
ENSG00000187045.12	0.212374	[0.02078899; 0.40395912]	0.0298044	0.376146	0.046276	FEM
ENSG00000129691.11	-0.210724	[-0.40086066; -0.02058814]	0.0298383	0.062229	0.37904	FEM
ENSG00000050393.7	-0.211405	[-0.40224290; -0.02056698]	0.0299136	0.163483	0.250209	FEM
ENSG00000077984.4	-0.211497	[-0.40248681; -0.02050811]	0.0299719	0.30389	0.0979778	FEM
ENSG00000146521.5	0.209666	[0.02031017; 0.39902164]	0.0299896	0	0.983546	FEM
ENSG00000140694.12	-0.210791	[-0.40134692; -0.02023481]	0.0301489	0.138907	0.281034	FEM
ENSG00000149557.8	-0.211427	[-0.40262337; -0.02023018]	0.0302056	0.2498	0.150071	FEM
ENSG00000139988.5	0.209475	[0.01995568; 0.39899466]	0.0302821	0	0.912407	FEM
ENSG00000157077.10	-0.209723	[-0.39966912; -0.01977783]	0.030458	0	0.76829	FEM
ENSG00000272150.1	0.210752	[0.01981404; 0.40168951]	0.0305109	0.146613	0.271304	FEM
ENSG00000139323.9	-0.209761	[-0.39986846; -0.01965299]	0.0305703	0	0.495279	FEM
ENSG00000262589.1	0.211035	[0.01976892; 0.40230060]	0.0305733	0.254974	0.144659	FEM
ENSG00000179604.8	0.210005	[0.01967060; 0.40033898]	0.0305749	0	0.494735	FEM
ENSG00000173638.14	-0.211811	[-0.40380850; -0.01981435]	0.030597	0.442257	0.0180517	FEM
ENSG00000213918.6	0.211416	[0.01976672; 0.40306440]	0.0306062	0.379989	0.0441464	FEM
ENSG00000114423.14	0.211027	[0.01968684; 0.40236792]	0.0306442	0.364314	0.0532285	FEM
ENSG00000176485.6	-0.2113	[-0.40296408; -0.01963494]	0.0307115	0.416193	0.0271105	FEM
ENSG00000164220.6	0.210571	[0.01955364; 0.40158931]	0.0307234	0.213898	0.189716	FEM
ENSG00000087274.12	-0.20971	[-0.40004533; -0.01937400]	0.030811	0.0860264	0.348613	FEM
ENSG00000265231.2	0.20956	[0.01936002; 0.39976087]	0.0308111	0	0.585557	FEM
ENSG00000233701.2	0.209484	[0.01934817; 0.39961947]	0.0308153	0	0.577515	FEM
ENSG00000133169.5	-0.211133	[-0.40287657; -0.01938919]	0.0309126	0.417356	0.0266511	FEM
ENSG00000140830.4	0.209816	[0.01921507; 0.40041623]	0.0309594	0.0710642	0.367766	FEM
ENSG00000161835.6	-0.210509	[-0.40178204; -0.01923529]	0.0309974	0.317583	0.0865127	FEM
ENSG00000180881.15	0.210125	[0.01912900; 0.40112047]	0.0310601	0.275645	0.1239	FEM
ENSG00000138650.7	0.209308	[0.01896573; 0.39964957]	0.0311388	0.086772	0.347657	FEM
ENSG00000121410.7	-0.208587	[-0.39831246; -0.01886122]	0.0311736	0	0.846522	FEM
ENSG00000054654.11	0.211078	[0.01902076; 0.40313608]	0.0312314	0.440525	0.0185762	FEM
ENSG00000244486.3	-0.20951	[-0.40024108; -0.01877922]	0.0313202	0.166739	0.246177	FEM
ENSG00000113262.10	0.208066	[0.01864639; 0.39748654]	0.0313233	0	0.965392	FEM
ENSG00000260164.1	0.209669	[0.01876112; 0.40057765]	0.0313489	0.21622	0.187051	FEM
ENSG00000186197.8	0.20883	[0.01868101; 0.39897800]	0.0313534	0	0.626471	FEM
ENSG00000135838.9	0.210054	[0.01876200; 0.40134535]	0.0313786	0.303944	0.097931	FEM
ENSG00000170412.12	0.208746	[0.01851019; 0.39898230]	0.0314991	0	0.534495	FEM
ENSG00000173436.9	-0.209215	[-0.39988847; -0.01854075]	0.0315089	0.270337	0.129095	FEM
ENSG00000069869.11	0.208335	[0.01841479; 0.39825456]	0.0315518	0	0.709055	FEM
ENSG00000204010.3	0.207818	[0.01825904; 0.39737720]	0.0316507	0	0.883939	FEM
ENSG00000139618.10	0.209037	[0.01834659; 0.39972664]	0.0316681	0.160025	0.254507	FEM
ENSG00000112499.8	0.208073	[0.01822304; 0.39792380]	0.0317032	0	0.84329	FEM
ENSG00000203301.2	-0.209382	[-0.40043113; -0.01833313]	0.0317072	0.342206	0.0678251	FEM
ENSG00000109572.9	-0.209101	[-0.39992060; -0.01828111]	0.0317317	0.317005	0.086981	FEM
ENSG00000132561.9	0.210087	[0.01824218; 0.40193247]	0.0318433	0.451051	0.0155485	FEM
ENSG00000159208.11	0.209255	[0.01811703; 0.40039213]	0.0318906	0.266788	0.132621	FEM
ENSG00000130948.5	-0.210004	[-0.40183459; -0.01817275]	0.0318988	0.391397	0.038193	FEM
ENSG00000140832.5	0.208541	[0.01803778; 0.39904371]	0.0319063	0.0466921	0.398765	FEM
ENSG00000132670.16	-0.207483	[-0.39707769; -0.01788805]	0.0319589	0	0.850089	FEM
ENSG00000178057.10	-0.208816	[-0.39967088; -0.01796121]	0.0319965	0.312233	0.0909025	FEM
ENSG00000102032.8	0.208107	[0.01788468; 0.39832936]	0.0320105	0	0.626134	FEM
ENSG00000269198.1	0.208107	[0.01788468; 0.39832936]	0.0320105	0	0.626134	FEM
ENSG00000150722.6	0.207951	[0.01786735; 0.39803399]	0.0320141	0	0.566526	FEM
ENSG00000112977.11	-0.207692	[-0.39760550; -0.01777858]	0.0320743	0	0.773038	FEM
ENSG00000128573.18	0.208387	[0.01781035; 0.39896456]	0.0320993	0.203769	0.201483	FEM
ENSG00000169249.8	0.209086	[0.01786563; 0.40030548]	0.0321033	0.404083	0.0322107	FEM
ENSG00000169905.8	0.208633	[0.01774956; 0.39951582]	0.0321731	0.18484	0.224035	FEM
ENSG00000100320.18	0.207785	[0.01761795; 0.39795219]	0.032227	0.0204051	0.431724	FEM
ENSG00000206481.7	0.20789	[0.01752844; 0.39825247]	0.0323163	0	0.543072	FEM
ENSG00000155380.7	0.207136	[0.01746441; 0.39680768]	0.0323167	0	0.767158	FEM
ENSG00000257383.1	0.209715	[0.01767767; 0.40175216]	0.0323205	0.467762	0.0114926	FEM
ENSG00000257736.1	0.209715	[0.01767767; 0.40175216]	0.0323205	0.467762	0.0114926	FEM
ENSG00000257944.1	0.209715	[0.01767767; 0.40175216]	0.0323205	0.467762	0.0114926	FEM
ENSG00000041353.5	-0.208377	[-0.39921969; -0.01753336]	0.032349	0.340472	0.0690578	FEM
ENSG00000206353.7	-0.207606	[-0.39787336; -0.01733913]	0.0324668	0.0107641	0.443647	FEM
ENSG00000228896.5	-0.207606	[-0.39787336; -0.01733913]	0.0324668	0.0107641	0.443647	FEM
ENSG00000232616.5	-0.207606	[-0.39787336; -0.01733913]	0.0324668	0.0107641	0.443647	FEM
ENSG00000206384.6	0.207272	[0.01730229; 0.39724083]	0.0324749	0	0.68421	FEM
ENSG00000116711.8	0.207028	[0.01723992; 0.39681654]	0.0325134	0	0.831881	FEM
ENSG00000185958.5	0.206894	[0.01721736; 0.39657104]	0.0325238	0	0.820474	FEM
ENSG00000055957.6	0.207294	[0.01708629; 0.39750264]	0.0326741	0	0.503873	FEM
ENSG00000105289.10	0.208067	[0.01714581; 0.39898802]	0.0326778	0.182712	0.226612	FEM
ENSG00000119242.4	-0.2068	[-0.39656671; -0.01703421]	0.0326845	0	0.733789	FEM
ENSG00000262509.3	0.20793	[0.01712226; 0.39873704]	0.032689	0.15957	0.255073	FEM
ENSG00000168878.12	0.208251	[0.01712697; 0.39937420]	0.0327088	0.258948	0.140559	FEM
ENSG00000227772.4	0.207507	[0.01702227; 0.39799233]	0.0327487	0	0.507694	FEM
ENSG00000085840.8	0.207371	[0.01692707; 0.39781577]	0.0328257	0.0857412	0.348978	FEM
ENSG00000130940.10	0.208701	[0.01701331; 0.40038822]	0.032846	0.365406	0.0525617	FEM
ENSG00000198055.6	-0.207524	[-0.39822464; -0.01682407]	0.0329316	0.283052	0.116819	FEM
ENSG00000198457.9	0.206746	[0.01669336; 0.39679828]	0.0329939	0	0.746179	FEM
ENSG00000147799.7	0.206895	[0.01661159; 0.39717754]	0.0330803	0	0.571302	FEM
ENSG00000198156.6	0.20683	[0.01654913; 0.39711089]	0.0331332	0	0.516646	FEM
ENSG00000186638.11	0.206177	[0.01649523; 0.39585883]	0.0331347	0	0.681863	FEM
ENSG00000197479.4	0.20734	[0.01656309; 0.39811764]	0.033158	0.11117	0.316379	FEM
ENSG00000262565.2	0.20734	[0.01656309; 0.39811764]	0.033158	0.11117	0.316379	FEM
ENSG00000174429.3	0.207424	[0.01647484; 0.39837327]	0.0332455	0.234263	0.166801	FEM
ENSG00000095752.2	0.206308	[0.01632518; 0.39629131]	0.0333021	0	0.78112	FEM
ENSG00000253350.1	0.205979	[0.01627259; 0.39568479]	0.0333268	0	0.785822	FEM
ENSG00000141034.5	0.206822	[0.01632480; 0.39731853]	0.0333401	0.164688	0.248715	FEM
ENSG00000166261.6	0.206926	[0.01631502; 0.39753710]	0.0333568	0.0806228	0.355537	FEM
ENSG00000142751.10	0.206819	[0.01627572; 0.39736325]	0.0333854	0.133443	0.287962	FEM
ENSG00000117477.8	0.206216	[0.01622749; 0.39620507]	0.0333861	0	0.695147	FEM
ENSG00000183598.3	0.207697	[0.01633533; 0.39905794]	0.0333941	0.285085	0.114909	FEM
ENSG00000265133.1	0.207697	[0.01633533; 0.39905794]	0.0333941	0.285085	0.114909	FEM
ENSG00000106609.12	-0.207292	[-0.39841234; -0.01617173]	0.0335161	0.368733	0.050562	FEM
ENSG00000136141.10	0.208088	[0.01615362; 0.40002296]	0.0335901	0.46984	0.0110487	FEM
ENSG00000177479.15	-0.206677	[-0.39733973; -0.01601463]	0.0336175	0.246965	0.153071	FEM
ENSG00000196418.8	0.207626	[0.01608772; 0.39916394]	0.0336179	0.349554	0.0627421	FEM
ENSG00000182220.9	-0.206574	[-0.39719298; -0.01595525]	0.0336654	0.239511	0.161072	FEM
ENSG00000166313.14	-0.207541	[-0.39907113; -0.01601118]	0.0336828	0.443909	0.0175609	FEM
ENSG00000213471.4	0.207451	[0.01594532; 0.39895586]	0.0337375	0.362126	0.0545798	FEM
ENSG00000119865.4	0.205755	[0.01580898; 0.39570153]	0.0337431	0	0.637931	FEM
ENSG00000224470.3	-0.207217	[-0.39853409; -0.01589921]	0.0337636	0.36662	0.0518263	FEM
ENSG00000166002.2	0.205735	[0.01574181; 0.39572819]	0.0338046	0	0.786077	FEM
ENSG00000189266.7	0.20743	[0.01584121; 0.39901959]	0.0338328	0.357275	0.0576489	FEM
ENSG00000018408.10	0.206763	[0.01564460; 0.39788220]	0.0339688	0.226596	0.175303	FEM
ENSG00000135698.5	-0.205724	[-0.39614111; -0.01530642]	0.034213	0.117269	0.308576	FEM
ENSG00000165238.12	0.206088	[0.01523339; 0.39694213]	0.0343073	0.237537	0.163217	FEM
ENSG00000112697.11	-0.206508	[-0.39787180; -0.01514425]	0.0344204	0.404184	0.0321655	FEM
ENSG00000149476.10	-0.204892	[-0.39481323; -0.01497033]	0.034473	0	0.646259	FEM
ENSG00000234836.3	-0.205905	[-0.39677208; -0.01503786]	0.0344792	0.2043	0.20086	FEM
ENSG00000144061.8	0.206652	[0.01501831; 0.39828663]	0.0345491	0.454098	0.0147422	FEM
ENSG00000164707.11	0.205392	[0.01491065; 0.39587289]	0.0345643	0	0.490093	FEM
ENSG00000108219.10	-0.205766	[-0.39659796; -0.01493484]	0.0345671	0.187904	0.22034	FEM
ENSG00000197006.9	-0.206463	[-0.39798119; -0.01494516]	0.0346051	0.49231	0.00701897	FEM
ENSG00000167645.12	-0.20522	[-0.39559999; -0.01483964]	0.0346199	0.0964418	0.335257	FEM
ENSG00000173598.9	0.205801	[0.01479997; 0.39680163]	0.0346973	0.1992	0.206862	FEM
ENSG00000134250.13	0.205065	[0.01471079; 0.39541959]	0.0347319	0.00385977	0.452123	FEM
ENSG00000270650.1	-0.206627	[-0.39844155; -0.01481206]	0.034742	0.427957	0.0227071	FEM
ENSG00000271121.1	-0.206627	[-0.39844155; -0.01481206]	0.034742	0.427957	0.0227071	FEM
ENSG00000054793.9	-0.203802	[-0.39311086; -0.01449254]	0.0348543	0	0.948428	FEM
ENSG00000134057.10	0.205317	[0.01456457; 0.39606866]	0.0348883	0.147819	0.269786	FEM
ENSG00000186367.5	0.205465	[0.01449216; 0.39643687]	0.0349673	0.193915	0.213137	FEM
ENSG00000156475.14	-0.205791	[-0.39712410; -0.01445833]	0.0350215	0.395963	0.0359634	FEM
ENSG00000107021.11	-0.20466	[-0.39494886; -0.01437022]	0.0350297	0.146432	0.271532	FEM
ENSG00000165972.8	0.204898	[0.01436241; 0.39543319]	0.0350532	0.192306	0.215059	FEM
ENSG00000262727.1	0.204081	[0.01428758; 0.39387530]	0.0350701	0	0.851471	FEM
ENSG00000175606.6	0.205299	[0.01436936; 0.39622936]	0.0350735	0.299828	0.101521	FEM
ENSG00000146221.8	0.204137	[0.01424751; 0.39402572]	0.0351124	0	0.683083	FEM
ENSG00000227642.5	-0.205372	[-0.39642594; -0.01431793]	0.0351275	0.233715	0.167403	FEM
ENSG00000115317.7	-0.205934	[-0.39752287; -0.01434565]	0.0351384	0.442904	0.0178583	FEM
ENSG00000033170.12	-0.206319	[-0.39827801; -0.01436038]	0.0351499	0.426931	0.02307	FEM
ENSG00000213999.11	0.20423	[0.01413550; 0.39432416]	0.0352264	0	0.675838	FEM
ENSG00000033178.8	0.205262	[0.01419643; 0.39632839]	0.0352365	0.329736	0.0769739	FEM
ENSG00000267906.1	0.204979	[0.01411272; 0.39584506]	0.035298	0.2315	0.169847	FEM
ENSG00000134287.5	-0.204423	[-0.39480666; -0.01403968]	0.0353315	0.141796	0.277381	FEM
ENSG00000075618.13	-0.206048	[-0.39799143; -0.01410486]	0.0353759	0.418107	0.0263577	FEM
ENSG00000181908.4	0.204512	[0.01396552; 0.39505840]	0.0354088	0.154276	0.261683	FEM
ENSG00000198848.8	0.204086	[0.01392927; 0.39424297]	0.0354157	0	0.684772	FEM
ENSG00000230341.4	0.204975	[0.01396249; 0.39598790]	0.0354421	0.194051	0.212975	FEM
ENSG00000234000.4	0.204975	[0.01396249; 0.39598790]	0.0354421	0.194051	0.212975	FEM
ENSG00000227715.6	-0.203223	[-0.39273776; -0.01370894]	0.0355725	0	0.919544	FEM
ENSG00000173517.6	0.20435	[0.01370273; 0.39499679]	0.035652	0.271581	0.127868	FEM
ENSG00000155962.8	0.2052	[0.01373808; 0.39666162]	0.0356728	0.325579	0.0801679	FEM
ENSG00000005981.8	0.205643	[0.01376391; 0.39752151]	0.0356765	0.430624	0.0217821	FEM
ENSG00000118137.5	0.203276	[0.01358209; 0.39297056]	0.0356993	0	0.872805	FEM
ENSG00000198612.6	-0.204188	[-0.39492833; -0.01344739]	0.0358891	0.346817	0.0646085	FEM
ENSG00000116690.7	0.203463	[0.01319780; 0.39372876]	0.0360861	0	0.605814	FEM
ENSG00000119125.12	0.203785	[0.01316772; 0.39440213]	0.0361358	0.125046	0.298647	FEM
ENSG00000198763.3	-0.204236	[-0.39531152; -0.01316022]	0.0361715	0.351994	0.061105	FEM
ENSG00000147155.6	-0.204616	[-0.39606444; -0.01316665]	0.0361891	0.411321	0.0290918	FEM
ENSG00000268394.1	-0.204616	[-0.39606444; -0.01316665]	0.0361891	0.411321	0.0290918	FEM
ENSG00000156413.9	0.203146	[0.01287466; 0.39341773]	0.0363828	0.0020167	0.454376	FEM
ENSG00000142856.12	-0.202934	[-0.39300820; -0.01285915]	0.0363848	0.0416254	0.405163	FEM
ENSG00000152936.6	0.202855	[0.01276785; 0.39294168]	0.0364698	0	0.524863	FEM
ENSG00000161573.6	0.204459	[0.01284057; 0.39607662]	0.0364974	0.34264	0.0675181	FEM
ENSG00000206488.6	0.203913	[0.01276531; 0.39505976]	0.0365376	0.242858	0.15746	FEM
ENSG00000229061.4	0.203913	[0.01276531; 0.39505976]	0.0365376	0.242858	0.15746	FEM
ENSG00000234549.4	0.203913	[0.01276531; 0.39505976]	0.0365376	0.242858	0.15746	FEM
ENSG00000214309.3	-0.202772	[-0.39287816; -0.01266486]	0.0365662	0.0287753	0.421296	FEM
ENSG00000072571.15	0.203772	[0.01265927; 0.39488374]	0.036633	0.240329	0.160186	FEM
ENSG00000152583.8	0.202059	[0.01254983; 0.39156816]	0.0366361	0	0.934254	FEM
ENSG00000127863.11	0.203366	[0.01262613; 0.39410498]	0.0366408	0.15697	0.258316	FEM
ENSG00000131187.5	-0.203603	[-0.39466679; -0.01253923]	0.0367409	0.322518	0.0825661	FEM
ENSG00000151414.10	-0.203827	[-0.39512176; -0.01253275]	0.0367608	0.303231	0.0985481	FEM
ENSG00000134243.7	-0.202849	[-0.39324363; -0.01245341]	0.0367798	0.0140926	0.439542	FEM
ENSG00000263961.2	0.202994	[0.01245869; 0.39352900]	0.0367834	0.0300785	0.419666	FEM
ENSG00000172005.6	-0.204505	[-0.39651118; -0.01249903]	0.0368348	0.454399	0.0146641	FEM
ENSG00000090530.5	0.204279	[0.01241777; 0.39614038]	0.0369011	0.421711	0.0249787	FEM
ENSG00000186767.5	-0.202922	[-0.39352069; -0.01232258]	0.0369137	0.19036	0.217389	FEM
ENSG00000268762.1	-0.202922	[-0.39352069; -0.01232258]	0.0369137	0.19036	0.217389	FEM
ENSG00000137193.9	0.204804	[0.01241907; 0.39718982]	0.0369312	0.495296	0.0065815	FEM
ENSG00000138835.18	-0.203173	[-0.39406313; -0.01228324]	0.0369677	0.213889	0.189727	FEM
ENSG00000087269.11	0.203003	[0.01222596; 0.39377998]	0.0370143	0.139847	0.279844	FEM
ENSG00000146067.11	0.204124	[0.01225286; 0.39599423]	0.0370543	0.499726	0.00597101	FEM
ENSG00000227471.4	0.203058	[0.01214917; 0.39396778]	0.0370937	0.210957	0.193109	FEM
ENSG00000166411.9	-0.20273	[-0.39333549; -0.01212396]	0.0370992	0.0835231	0.351821	FEM
ENSG00000104375.11	0.203399	[0.01214235; 0.39465561]	0.0371206	0.307343	0.0950159	FEM
ENSG00000104218.9	0.202395	[0.01207387; 0.39271522]	0.0371291	0.0539398	0.389582	FEM
ENSG00000133030.15	-0.202861	[-0.39363615; -0.01208610]	0.0371446	0.189388	0.218555	FEM
ENSG00000088756.8	0.201814	[0.01200593; 0.39162199]	0.0371624	0	0.70951	FEM
ENSG00000206505.8	0.202856	[0.01191632; 0.39379640]	0.0373132	0.213227	0.190489	FEM
ENSG00000179222.13	-0.202257	[-0.39270022; -0.01181461]	0.0373796	0.0596375	0.38234	FEM
ENSG00000268018.2	-0.202257	[-0.39270022; -0.01181461]	0.0373796	0.0596375	0.38234	FEM
ENSG00000196976.5	-0.20264	[-0.39347774; -0.01180282]	0.0374137	0.210543	0.193588	FEM
ENSG00000121858.6	0.201553	[0.01172217; 0.39138415]	0.0374311	0	0.8252	FEM
ENSG00000147570.5	0.20303	[0.01172402; 0.39433675]	0.0375148	0.333071	0.0744632	FEM
ENSG00000145850.4	0.203148	[0.01170516; 0.39459086]	0.0375404	0.334086	0.0737082	FEM
ENSG00000166912.12	-0.201983	[-0.39233378; -0.01163158]	0.0375469	0	0.48232	FEM
ENSG00000105877.13	0.202232	[0.01163845; 0.39282624]	0.0375544	0.120269	0.304743	FEM
ENSG00000159348.8	-0.201438	[-0.39128659; -0.01158886]	0.0375583	0	0.733872	FEM
ENSG00000125520.9	-0.201799	[-0.39200170; -0.01159674]	0.0375712	0.0832224	0.352206	FEM
ENSG00000143603.14	0.200946	[0.01140040; 0.39049243]	0.0377199	0	0.895667	FEM
ENSG00000121289.13	0.201302	[0.01141126; 0.39119188]	0.0377292	0	0.785546	FEM
ENSG00000076258.5	0.202663	[0.01145214; 0.39387396]	0.0377656	0.387849	0.039986	FEM
ENSG00000172940.7	0.201158	[0.01135938; 0.39095569]	0.0377734	0	0.813664	FEM
ENSG00000138744.10	-0.202672	[-0.39394309; -0.01140140]	0.037817	0.323678	0.0816524	FEM
ENSG00000206433.6	-0.202982	[-0.39455115; -0.01141322]	0.0378226	0.424329	0.0240086	FEM
ENSG00000156026.10	-0.202274	[-0.39324123; -0.01130773]	0.0378886	0.325765	0.0800236	FEM
ENSG00000137709.5	0.201164	[0.01121924; 0.39110862]	0.0379153	0	0.648634	FEM
ENSG00000154127.5	-0.202424	[-0.39373095; -0.01111649]	0.0380894	0.298417	0.102767	FEM
ENSG00000149531.10	0.201266	[0.01104978; 0.39148141]	0.0380925	0.00417221	0.45174	FEM
ENSG00000090659.13	0.201137	[0.01102230; 0.39125102]	0.0381132	0	0.610176	FEM
ENSG00000089472.12	0.202159	[0.01103075; 0.39328787]	0.0381612	0.375536	0.0466199	FEM
ENSG00000137185.7	0.200291	[0.01086163; 0.38972053]	0.0382297	0	0.970144	FEM
ENSG00000084072.12	-0.2004	[-0.38999197; -0.01080766]	0.0382907	0	0.735836	FEM
ENSG00000125510.11	-0.202059	[-0.39329028; -0.01082746]	0.0383612	0.379073	0.0446485	FEM
ENSG00000139574.7	0.200497	[0.01073886; 0.39025534]	0.0383662	0	0.868486	FEM
ENSG00000156269.4	0.202623	[0.01078198; 0.39446413]	0.0384376	0.409884	0.0296944	FEM
ENSG00000084674.9	0.200387	[0.01065280; 0.39012155]	0.038448	0	0.794458	FEM
ENSG00000070669.12	0.201004	[0.01065952; 0.39134876]	0.0384746	8.13683e-05	0.456737	FEM
ENSG00000235360.2	-0.202065	[-0.39341735; -0.01071272]	0.0384777	0.292994	0.107625	FEM
ENSG00000197363.5	-0.201674	[-0.39267668; -0.01067130]	0.0384987	0.363302	0.0538512	FEM
ENSG00000134588.8	0.20252	[0.01070890; 0.39433091]	0.038506	0.40913	0.0300136	FEM
ENSG00000213281.4	-0.202494	[-0.39428248; -0.01070519]	0.0385083	0.487569	0.00775825	FEM
ENSG00000147459.13	-0.200962	[-0.39131518; -0.01060921]	0.0385236	0	0.496141	FEM
ENSG00000136367.12	0.201695	[0.01056069; 0.39282906]	0.0386123	0.290159	0.110209	FEM
ENSG00000123684.8	-0.201148	[-0.39177807; -0.01051818]	0.0386264	0.180329	0.229505	FEM
ENSG00000075290.7	0.201838	[0.01051181; 0.39316389]	0.0386696	0.331744	0.0754566	FEM
ENSG00000131508.11	-0.201231	[-0.39198794; -0.01047371]	0.0386762	0.270999	0.128441	FEM
ENSG00000100299.13	-0.200925	[-0.39140407; -0.01044691]	0.0386873	0.224717	0.177411	FEM
ENSG00000143217.7	0.201823	[0.01048245; 0.39316263]	0.0386986	0.342488	0.0676257	FEM
ENSG00000197587.6	0.200594	[0.01041717; 0.39077014]	0.0387001	0	0.51527	FEM
ENSG00000232629.4	0.201926	[0.01047985; 0.39337286]	0.0387067	0.41013	0.0295904	FEM
ENSG00000215784.4	0.199826	[0.01033069; 0.38932193]	0.038748	0	0.951141	FEM
ENSG00000264416.1	0.199826	[0.01033069; 0.38932193]	0.038748	0	0.951141	FEM
ENSG00000124635.7	0.201132	[0.01032194; 0.39194247]	0.0388259	0.14975	0.267359	FEM
ENSG00000138107.7	-0.201076	[-0.39183625; -0.01031630]	0.0388288	0.219918	0.182835	FEM
ENSG00000196155.8	-0.20192	[-0.39352521; -0.01031570]	0.0388735	0.422065	0.0248459	FEM
ENSG00000167106.7	-0.201373	[-0.39254780; -0.01019851]	0.0389647	0.310537	0.092319	FEM
ENSG00000010318.15	-0.200651	[-0.39141135; -0.00989041]	0.0392439	0.173513	0.237832	FEM
ENSG00000183214.8	0.199336	[0.00978265; 0.38888968]	0.0392884	0	0.93031	FEM
ENSG00000175183.5	0.201821	[0.00989969; 0.39374234]	0.0392934	0.446876	0.0167037	FEM
ENSG00000137648.12	0.199457	[0.00975840; 0.38915566]	0.0393197	0	0.902167	FEM
ENSG00000171451.13	-0.201063	[-0.39229011; -0.00983602]	0.0393207	0.26898	0.130438	FEM
ENSG00000262102.1	-0.201063	[-0.39229011; -0.00983602]	0.0393207	0.26898	0.130438	FEM
ENSG00000171148.9	-0.200281	[-0.39078862; -0.00977256]	0.0393467	0.178482	0.231755	FEM
ENSG00000124116.14	-0.201242	[-0.39266749; -0.00981560]	0.0393506	0.391698	0.0380432	FEM
ENSG00000138443.11	-0.199322	[-0.38892172; -0.00972156]	0.039351	0	0.883335	FEM
ENSG00000228405.5	-0.200697	[-0.39161439; -0.00977917]	0.0393608	0.199823	0.206126	FEM
ENSG00000140403.8	0.200135	[0.00972892; 0.39054202]	0.0393845	0.00216563	0.454194	FEM
ENSG00000023318.7	0.199138	[0.00967849; 0.38859814]	0.0393865	0	0.952394	FEM
ENSG00000085224.16	0.200929	[0.00974212; 0.39211493]	0.0394106	0.362921	0.0540864	FEM
ENSG00000206297.7	0.199979	[0.00961988; 0.39033771]	0.0394895	0	0.553962	FEM
ENSG00000226173.4	0.199979	[0.00961988; 0.39033771]	0.0394895	0	0.553962	FEM
ENSG00000108679.8	0.199758	[0.00960397; 0.38991177]	0.039495	0	0.483017	FEM
ENSG00000124557.8	0.198858	[0.00943020; 0.38828570]	0.0396311	0	0.953485	FEM
ENSG00000164970.10	-0.19977	[-0.39006927; -0.00947031]	0.0396343	0	0.519123	FEM
ENSG00000134058.6	0.1995	[0.00939932; 0.38960032]	0.0396949	0	0.613973	FEM
ENSG00000077463.10	0.200021	[0.00938317; 0.39065951]	0.0397372	0.169498	0.242771	FEM
ENSG00000223654.3	0.19983	[0.00933781; 0.39032195]	0.039775	0.00859582	0.446315	FEM
ENSG00000105374.5	-0.200414	[-0.39147040; -0.00935673]	0.0397837	0.391507	0.0381385	FEM
ENSG00000062194.11	0.201015	[0.00936794; 0.39266202]	0.0398011	0.454501	0.0146378	FEM
ENSG00000146232.10	0.199171	[0.00926287; 0.38907871]	0.0398211	0	0.789006	FEM
ENSG00000125834.8	0.200057	[0.00925457; 0.39085884]	0.0398725	0.304265	0.0976532	FEM
ENSG00000147804.5	-0.199643	[-0.39015216; -0.00913332]	0.039979	0.147182	0.270588	FEM
ENSG00000226165.5	0.200456	[0.00914543; 0.39176701]	0.0400051	0.386922	0.0404629	FEM
ENSG00000144791.5	0.199676	[0.00906633; 0.39028654]	0.0400506	0.159546	0.255103	FEM
ENSG00000186642.11	-0.199379	[-0.38972465; -0.00903315]	0.0400711	0.0549333	0.388321	FEM
ENSG00000174574.11	-0.19968	[-0.39035125; -0.00900909]	0.0401105	0.189629	0.218265	FEM
ENSG00000151834.11	0.199438	[0.00897428; 0.38990171]	0.0401355	0.0662578	0.373904	FEM
ENSG00000105784.11	0.199007	[0.00891104; 0.38910229]	0.0401815	0	0.647067	FEM
ENSG00000177283.4	0.199799	[0.00892939; 0.39066763]	0.0401994	0.235029	0.165959	FEM
ENSG00000160111.8	-0.20027	[-0.39160048; -0.00893859]	0.0402117	0.424372	0.0239926	FEM
ENSG00000141574.3	0.200885	[0.00890142; 0.39286900]	0.040279	0.402061	0.0331196	FEM
ENSG00000222020.2	-0.198896	[-0.38911669; -0.00867515]	0.0404243	0.00514337	0.450551	FEM
ENSG00000102221.9	0.199148	[0.00867169; 0.38962489]	0.0404395	0.185862	0.222801	FEM
ENSG00000133393.8	-0.200372	[-0.39203253; -0.00871141]	0.0404537	0.422953	0.024515	FEM
ENSG00000171931.8	0.198511	[0.00859547; 0.38842751]	0.0404907	0	0.722776	FEM
ENSG00000185274.7	0.198764	[0.00860310; 0.38892541]	0.0404941	0	0.504415	FEM
ENSG00000147144.8	0.200316	[0.00862411; 0.39200705]	0.0405424	0.394314	0.0367587	FEM
ENSG00000163961.4	0.20024	[0.00858375; 0.39189663]	0.0405813	0.447871	0.0164231	FEM
ENSG00000150773.6	0.198469	[0.00845222; 0.38848663]	0.0406401	0	0.672689	FEM
ENSG00000110079.12	0.200841	[0.00845758; 0.39322416]	0.0407401	0.472834	0.0104316	FEM
ENSG00000102119.6	-0.199652	[-0.39090258; -0.00840230]	0.0407456	0.383778	0.0421082	FEM
ENSG00000268557.1	-0.199652	[-0.39090258; -0.00840230]	0.0407456	0.383778	0.0421082	FEM
ENSG00000147050.10	0.199553	[0.00837347; 0.39073170]	0.0407715	0.287938	0.112254	FEM
ENSG00000056586.11	-0.199187	[-0.39007461; -0.00830008]	0.0408328	0.277903	0.12172	FEM
ENSG00000168386.14	0.199563	[0.00827744; 0.39084951]	0.0408732	0.314864	0.0887297	FEM
ENSG00000160606.6	-0.20038	[-0.39249040; -0.00826940]	0.0409172	0.455763	0.0143145	FEM
ENSG00000140320.7	0.199829	[0.00821199; 0.39144510]	0.0409537	0.478335	0.00936425	FEM
ENSG00000067829.14	-0.197932	[-0.38785334; -0.00801159]	0.0410841	0	0.56924	FEM
ENSG00000267989.2	-0.197932	[-0.38785334; -0.00801159]	0.0410841	0	0.56924	FEM
ENSG00000168904.10	-0.198333	[-0.38864939; -0.00801737]	0.0410952	0.116934	0.309004	FEM
ENSG00000167508.6	-0.198341	[-0.38868745; -0.00799444]	0.0411199	0.198749	0.207396	FEM
ENSG00000147439.7	0.198617	[0.00798659; 0.38924720]	0.0411401	0.127269	0.295814	FEM
ENSG00000197933.8	0.199499	[0.00795395; 0.39104351]	0.0412121	0.355736	0.0586439	FEM
ENSG00000206127.6	-0.19771	[-0.38754530; -0.00787509]	0.0412202	0	0.84692	FEM
ENSG00000143387.8	0.198718	[0.00781148; 0.38962515]	0.0413305	0.168315	0.244229	FEM
ENSG00000099377.9	0.19989	[0.00784555; 0.39193419]	0.0413432	0.47408	0.0101823	FEM
ENSG00000186666.4	0.198283	[0.00777235; 0.38879380]	0.041354	0.0834105	0.351965	FEM
ENSG00000111641.6	0.198394	[0.00768289; 0.38910562]	0.0414541	0.129435	0.293057	FEM
ENSG00000148841.11	0.199484	[0.00772231; 0.39124487]	0.041457	0.404201	0.0321583	FEM
ENSG00000141965.3	-0.198313	[-0.38901359; -0.00761340]	0.0415249	0.198366	0.207849	FEM
ENSG00000105255.6	-0.197963	[-0.38833155; -0.00759373]	0.0415316	0.155987	0.259544	FEM
ENSG00000122188.8	0.199714	[0.00764277; 0.39178434]	0.0415508	0.466117	0.0118532	FEM
ENSG00000225614.2	-0.198088	[-0.38862163; -0.00755346]	0.0415798	0.0198059	0.432468	FEM
ENSG00000108515.13	0.197552	[0.00752765; 0.38757541]	0.0415856	0	0.660321	FEM
ENSG00000268604.1	-0.198012	[-0.38857574; -0.00744887]	0.0416888	0.165352	0.247893	FEM
ENSG00000091536.12	0.197335	[0.00740591; 0.38726318]	0.0417075	0	0.597168	FEM
ENSG00000155428.8	0.196547	[0.00733615; 0.38575797]	0.041751	0	0.992784	FEM
ENSG00000262421.1	0.196547	[0.00733615; 0.38575797]	0.041751	0	0.992784	FEM
ENSG00000198142.3	0.197991	[0.00738871; 0.38859242]	0.0417524	0.152102	0.264407	FEM
ENSG00000135218.13	-0.197222	[-0.38712153; -0.00732150]	0.0417939	0	0.744719	FEM
ENSG00000136560.9	0.197876	[0.00726272; 0.38849008]	0.0418831	0.0746648	0.363163	FEM
ENSG00000168286.1	-0.197914	[-0.38868716; -0.00714031]	0.0420162	0.191837	0.21562	FEM
ENSG00000100241.16	-0.197059	[-0.38706845; -0.00704904]	0.0420816	0	0.511728	FEM
ENSG00000177943.9	0.198544	[0.00703434; 0.39005406]	0.0421544	0.368137	0.0509167	FEM
ENSG00000184454.6	0.197055	[0.00697593; 0.38713427]	0.0421605	0	0.630802	FEM
ENSG00000239457.2	0.199081	[0.00702043; 0.39114137]	0.0421897	0.458148	0.0137174	FEM
ENSG00000169026.8	0.196944	[0.00689736; 0.38698998]	0.0422414	0	0.716018	FEM
ENSG00000138160.4	0.197872	[0.00692300; 0.38882100]	0.0422488	0.396477	0.0357174	FEM
ENSG00000231641.5	-0.196301	[-0.38574111; -0.00686005]	0.0422574	0	0.935351	FEM
ENSG00000072840.8	-0.198171	[-0.38947181; -0.00686972]	0.0423175	0.310115	0.0926731	FEM
ENSG00000272962.1	0.199159	[0.00686039; 0.39145712]	0.0423642	0.477815	0.0094616	FEM
ENSG00000259752.1	0.196165	[0.00674618; 0.38558310]	0.0423763	0	0.963428	FEM
ENSG00000182195.6	-0.198604	[-0.39043720; -0.00677021]	0.0424407	0.412436	0.0286299	FEM
ENSG00000125457.9	-0.196479	[-0.38638777; -0.00657115]	0.0425787	0.00978866	0.444848	FEM
ENSG00000138613.9	-0.196798	[-0.38703822; -0.00655794]	0.0426047	0.037758	0.410033	FEM
ENSG00000169989.2	0.196936	[0.00652233; 0.38735048]	0.0426484	0.0534268	0.390233	FEM
ENSG00000243317.3	-0.197397	[-0.38829343; -0.00650001]	0.0426892	0.365165	0.0527084	FEM
ENSG00000234623.5	-0.197389	[-0.38829883; -0.00647946]	0.0427113	0.207389	0.197251	FEM
ENSG00000196214.6	0.196538	[0.00635742; 0.38671787]	0.042814	0	0.601968	FEM
ENSG00000173947.9	0.196442	[0.00633879; 0.38654598]	0.042831	0	0.531761	FEM
ENSG00000015568.8	0.1983	[0.00638684; 0.39021313]	0.0428439	0.394982	0.0364352	FEM
ENSG00000125409.8	0.195983	[0.00629820; 0.38566769]	0.0428593	0	0.765152	FEM
ENSG00000166228.4	0.197367	[0.00632305; 0.38841171]	0.0428806	0.271847	0.127607	FEM
ENSG00000186364.7	0.197104	[0.00630055; 0.38790776]	0.042896	0.152279	0.264185	FEM
ENSG00000139679.11	0.197474	[0.00628240; 0.38866476]	0.0429286	0.408235	0.0303956	FEM
ENSG00000214029.3	0.197121	[0.00622012; 0.38802164]	0.0429843	0.212706	0.191089	FEM
ENSG00000110619.12	0.197792	[0.00623640; 0.38934713]	0.0429896	0.463993	0.0123308	FEM
ENSG00000101460.8	-0.196863	[-0.38752854; -0.00619744]	0.0430002	0.180467	0.229337	FEM
ENSG00000160948.9	-0.197164	[-0.38812998; -0.00619837]	0.0430095	0.326382	0.0795457	FEM
ENSG00000089916.13	0.196313	[0.00616921; 0.38645679]	0.0430121	0	0.482568	FEM
ENSG00000125458.2	-0.196352	[-0.38656516; -0.00613836]	0.0430473	0.100346	0.33025	FEM
ENSG00000168298.4	0.196924	[0.00615203; 0.38769510]	0.0430519	0.136904	0.283572	FEM
ENSG00000128059.4	0.196716	[0.00611675; 0.38731477]	0.0430834	0.129719	0.292696	FEM
ENSG00000154175.12	0.1968	[0.00608274; 0.38751756]	0.0431235	0.198321	0.207902	FEM
ENSG00000067208.10	0.195894	[0.00595557; 0.38583274]	0.0432326	0	0.658057	FEM
ENSG00000242950.2	0.197309	[0.00599512; 0.38862252]	0.0432363	0.332881	0.0746048	FEM
ENSG00000179397.13	0.195861	[0.00588423; 0.38583691]	0.04331	0	0.586159	FEM
ENSG00000166035.6	-0.196336	[-0.38691553; -0.00575684]	0.0434658	0.214099	0.189485	FEM
ENSG00000119737.5	0.197343	[0.00577199; 0.38891314]	0.0434816	0.464174	0.0122895	FEM
ENSG00000238083.3	0.1958	[0.00569943; 0.38590086]	0.0435119	0	0.590024	FEM
ENSG00000262103.1	-0.19726	[-0.38884827; -0.00567112]	0.0435895	0.385711	0.0410917	FEM
ENSG00000168874.8	0.196688	[0.00556536; 0.38781114]	0.0436878	0.2288	0.172843	FEM
ENSG00000015171.14	-0.196666	[-0.38783534; -0.00549575]	0.0437638	0.387097	0.040373	FEM
ENSG00000152484.9	-0.197468	[-0.38942869; -0.00550764]	0.0437754	0.458276	0.0136858	FEM
ENSG00000038002.4	-0.195864	[-0.38628743; -0.00544133]	0.0437993	0.138074	0.282089	FEM
ENSG00000196663.11	-0.195797	[-0.38616023; -0.00543292]	0.0438065	0	0.488213	FEM
ENSG00000135476.7	0.196444	[0.00543658; 0.38745224]	0.0438223	0.280003	0.11971	FEM
ENSG00000066044.9	-0.196347	[-0.38726686; -0.00542766]	0.0438292	0.268752	0.130664	FEM
ENSG00000213185.2	-0.196053	[-0.38669227; -0.00541345]	0.0438359	0.107512	0.321064	FEM
ENSG00000104611.7	0.197144	[0.00542865; 0.38885865]	0.0438523	0.392299	0.0377458	FEM
ENSG00000163535.13	0.195244	[0.00530865; 0.38517903]	0.0439275	0	0.697171	FEM
ENSG00000164512.13	-0.19641	[-0.38749231; -0.00532707]	0.0439422	0.342372	0.0677074	FEM
ENSG00000046889.14	0.194879	[0.00523809; 0.38451978]	0.0439951	0	0.776414	FEM
ENSG00000187720.10	0.196348	[0.00527736; 0.38741904]	0.0439954	0.221769	0.180736	FEM
ENSG00000046604.8	0.195121	[0.00521458; 0.38502807]	0.0440285	0	0.761785	FEM
ENSG00000142303.9	-0.195546	[-0.38588594; -0.00520534]	0.0440514	0.0870413	0.347312	FEM
ENSG00000262182.2	-0.1969	[-0.38858217; -0.00521810]	0.0440771	0.45939	0.0134138	FEM
ENSG00000156697.8	0.195161	[0.00515532; 0.38516736]	0.0440958	0	0.60084	FEM
ENSG00000103942.8	-0.195115	[-0.38508905; -0.00513997]	0.0441115	0	0.531096	FEM
ENSG00000173212.4	0.194791	[0.00510823; 0.38447304]	0.0441374	0	0.732834	FEM
ENSG00000120694.15	0.195679	[0.00511127; 0.38624748]	0.0441599	0.053326	0.390361	FEM
ENSG00000273274.1	0.196174	[0.00512315; 0.38722410]	0.0441611	0.293106	0.107523	FEM
ENSG00000188056.7	-0.196778	[-0.38849369; -0.00506258]	0.0442455	0.485694	0.00806617	FEM
ENSG00000151789.5	-0.19668	[-0.38834488; -0.00501453]	0.044296	0.42363	0.0242649	FEM
ENSG00000092295.7	0.194204	[0.00490319; 0.38350479]	0.0443501	0	0.981539	FEM
ENSG00000162614.14	0.196048	[0.00486848; 0.38722812]	0.0444405	0.240376	0.160135	FEM
ENSG00000143850.8	0.1945	[0.00479687; 0.38420291]	0.0444777	0	0.722706	FEM
ENSG00000066697.10	-0.195719	[-0.38665577; -0.00478250]	0.0445272	0.265808	0.133602	FEM
ENSG00000149485.12	-0.194765	[-0.38483575; -0.00469367]	0.0446007	0	0.632367	FEM
ENSG00000167757.9	0.196134	[0.00470209; 0.38756563]	0.0446281	0.333954	0.0738058	FEM
ENSG00000259132.1	0.195796	[0.00454698; 0.38704532]	0.0447923	0.298422	0.102762	FEM
ENSG00000163297.12	0.195775	[0.00453412; 0.38701653]	0.0448062	0.311036	0.0919014	FEM
ENSG00000179820.11	-0.195638	[-0.38683063; -0.00444583]	0.0449015	0.413207	0.0283135	FEM
ENSG00000105967.11	0.195984	[0.00442429; 0.38754428]	0.0449344	0.355908	0.0585325	FEM
ENSG00000121274.8	0.196383	[0.00430950; 0.38845629]	0.0450726	0.434658	0.0204327	FEM
ENSG00000182107.5	0.195213	[0.00427926; 0.38614653]	0.0450778	0.324347	0.0811286	FEM
ENSG00000012048.15	0.19465	[0.00424972; 0.38505014]	0.0450972	0	0.490992	FEM
ENSG00000108264.12	-0.194227	[-0.38421673; -0.00423744]	0.0451006	0	0.723817	FEM
ENSG00000176014.8	0.195358	[0.00422165; 0.38649399]	0.0451461	0.320756	0.0839633	FEM
ENSG00000174600.9	0.194469	[0.00420143; 0.38473628]	0.0451472	0	0.60643	FEM
ENSG00000100403.10	-0.193989	[-0.38388691; -0.00409114]	0.0452604	0	0.803204	FEM
ENSG00000140488.10	0.194509	[0.00406527; 0.38495199]	0.0453021	0.112802	0.31429	FEM
ENSG00000067836.8	-0.195541	[-0.38700724; -0.00407497]	0.0453154	0.389461	0.039165	FEM
ENSG00000102882.7	-0.19478	[-0.38552259; -0.00403659]	0.0453409	0.225487	0.176547	FEM
ENSG00000134590.9	-0.194709	[-0.38543238; -0.00398642]	0.0453959	0.132939	0.288602	FEM
ENSG00000131941.3	0.194263	[0.00396163; 0.38456393]	0.0454137	0.0214042	0.430483	FEM
ENSG00000138792.5	0.193958	[0.00392608; 0.38399000]	0.045447	0	0.564836	FEM
ENSG00000173281.4	0.196094	[0.00393555; 0.38825215]	0.0454849	0.477421	0.00953574	FEM
ENSG00000156928.4	0.194069	[0.00388719; 0.38425059]	0.0454937	0	0.619151	FEM
ENSG00000178104.15	0.194339	[0.00388946; 0.38478762]	0.0454972	0.16246	0.251479	FEM
ENSG00000167807.11	0.193881	[0.00382500; 0.38393652]	0.0455601	0	0.6741	FEM
ENSG00000124782.15	0.194721	[0.00379568; 0.38564588]	0.0456121	0.255878	0.143722	FEM
ENSG00000189043.5	-0.194806	[-0.38582355; -0.00378779]	0.0456229	0.348882	0.0631974	FEM
ENSG00000177575.8	0.195033	[0.00374718; 0.38631967]	0.0456738	0.295935	0.104976	FEM
ENSG00000265277.2	0.194607	[0.00373218; 0.38548261]	0.0456816	0.276744	0.122837	FEM
ENSG00000184384.9	0.194644	[0.00372979; 0.38555842]	0.0456851	0.211021	0.193035	FEM
ENSG00000092978.6	0.194961	[0.00364962; 0.38627213]	0.0457828	0.458128	0.0137223	FEM
ENSG00000139910.15	0.193731	[0.00361651; 0.38384486]	0.0457943	0.0392435	0.408164	FEM
ENSG00000205593.7	-0.194564	[-0.38557253; -0.00355480]	0.045882	0.405609	0.0315356	FEM
ENSG00000259938.1	-0.19385	[-0.38418249; -0.00351659]	0.0459107	0.0283508	0.421827	FEM
ENSG00000162924.9	0.194544	[0.00351884; 0.38557010]	0.0459225	0.247343	0.152669	FEM
ENSG00000148120.10	-0.194666	[-0.38592391; -0.00340851]	0.0460505	0.379695	0.0443071	FEM
ENSG00000149054.10	0.193522	[0.00338651; 0.38365664]	0.0460527	0	0.604651	FEM
ENSG00000153147.5	0.194113	[0.00338596; 0.38483955]	0.0460652	0.307929	0.0945178	FEM
ENSG00000272869.1	0.193781	[0.00335919; 0.38420234]	0.0460891	0.0750723	0.362642	FEM
ENSG00000180914.6	0.194838	[0.00336362; 0.38631217]	0.0461049	0.309867	0.0928813	FEM
ENSG00000121039.5	0.193902	[0.00330610; 0.38449847]	0.0461522	0.203738	0.20152	FEM
ENSG00000162438.7	0.193808	[0.00328989; 0.38432663]	0.0461689	0.02784	0.422465	FEM
ENSG00000137843.7	-0.193939	[-0.38458918; -0.00328953]	0.0461719	0.253119	0.14659	FEM
ENSG00000187210.8	0.194607	[0.00326953; 0.38594435]	0.0462076	0.329911	0.0768411	FEM
ENSG00000198886.2	-0.19384	[-0.38450644; -0.00317438]	0.0463018	0.282119	0.117699	FEM
ENSG00000184508.6	-0.192614	[-0.38214406; -0.00308423]	0.0463826	0	0.858272	FEM
ENSG00000259529.1	0.194503	[0.00308999; 0.38591665]	0.0464105	0.322132	0.0828709	FEM
ENSG00000127951.5	0.1946	[0.00306704; 0.38613327]	0.0464385	0.389065	0.0393654	FEM
ENSG00000269715.1	0.192619	[0.00292813; 0.38231017]	0.0465628	0	0.862026	FEM
ENSG00000175197.6	0.194788	[0.00295006; 0.38662589]	0.0465754	0.444459	0.0173997	FEM
ENSG00000217702.1	0.192639	[0.00284275; 0.38243448]	0.0466618	0	0.842357	FEM
ENSG00000262397.3	0.19244	[0.00276777; 0.38211227]	0.0467453	0	0.855329	FEM
ENSG00000236561.5	-0.192746	[-0.38273269; -0.00275941]	0.04676	0	0.756799	FEM
ENSG00000223533.4	0.193909	[0.00277015; 0.38504835]	0.0467668	0.31412	0.089341	FEM
ENSG00000224180.4	0.193909	[0.00277015; 0.38504835]	0.0467668	0.31412	0.089341	FEM
ENSG00000139116.13	0.193442	[0.00276199; 0.38412110]	0.0467685	0.168221	0.244346	FEM
ENSG00000174886.8	-0.192829	[-0.38290492; -0.00275246]	0.0467694	0.0185626	0.43401	FEM
ENSG00000101079.16	-0.192625	[-0.38250391; -0.00274653]	0.0467729	0	0.62396	FEM
ENSG00000170956.12	-0.192156	[-0.38160362; -0.00270837]	0.0468094	0	0.957525	FEM
ENSG00000083223.13	0.193326	[0.00270760; 0.38394521]	0.0468293	0.164826	0.248544	FEM
ENSG00000022277.8	-0.192989	[-0.38328729; -0.00269165]	0.0468423	0.138082	0.282079	FEM
ENSG00000225859.6	0.192987	[0.00265966; 0.38331341]	0.0468793	0	0.507851	FEM
ENSG00000069493.10	0.19317	[0.00265937; 0.38368079]	0.0468825	0.0384833	0.40912	FEM
ENSG00000006007.7	-0.193201	[-0.38376965; -0.00263222]	0.0469144	0.118507	0.306994	FEM
ENSG00000100522.4	0.19247	[0.00255977; 0.38238114]	0.0469869	0	0.66947	FEM
ENSG00000161533.7	-0.192582	[-0.38264268; -0.00252190]	0.0470325	0	0.473676	FEM
ENSG00000108960.3	-0.193071	[-0.38364969; -0.00249237]	0.0470741	0.284319	0.115626	FEM
ENSG00000138757.10	-0.194056	[-0.38561277; -0.00249873]	0.0470814	0.477671	0.00948864	FEM
ENSG00000168936.6	-0.192117	[-0.38182544; -0.00240829]	0.0471576	0	0.75367	FEM
ENSG00000180901.6	-0.191819	[-0.38123963; -0.00239849]	0.0471647	0	0.832003	FEM
ENSG00000156232.6	0.192686	[0.00232960; 0.38304242]	0.0472573	0	0.532837	FEM
ENSG00000152763.12	0.192117	[0.00231162; 0.38192172]	0.0472703	0	0.714366	FEM
ENSG00000102781.9	-0.193702	[-0.38511609; -0.00228695]	0.0473208	0.40532	0.0316626	FEM
ENSG00000267270.1	0.193265	[0.00225116; 0.38427872]	0.0473563	0.230989	0.170413	FEM
ENSG00000236759.3	0.194045	[0.00225436; 0.38583646]	0.0473631	0.467441	0.0115623	FEM
ENSG00000113532.8	0.193033	[0.00224149; 0.38382469]	0.0473644	0.215751	0.187589	FEM
ENSG00000159761.10	-0.192319	[-0.38249813; -0.00213956]	0.0474736	0	0.469797	FEM
ENSG00000198054.7	0.193177	[0.00214846; 0.38420637]	0.0474744	0.297338	0.103724	FEM
ENSG00000140948.7	0.192279	[0.00213823; 0.38242027]	0.0474746	0.0596267	0.382354	FEM
ENSG00000181036.9	-0.193064	[-0.38399216; -0.00213540]	0.0474881	0.325167	0.0804886	FEM
ENSG00000196735.7	0.192691	[0.00212300; 0.38325930]	0.0474977	0.0694782	0.369793	FEM
ENSG00000188647.8	0.193531	[0.00205017; 0.38501192]	0.0475929	0.428193	0.0226242	FEM
ENSG00000185614.4	-0.192948	[-0.38391641; -0.00197999]	0.0476674	0.312515	0.0906686	FEM
ENSG00000149328.10	0.191973	[0.00194016; 0.38200522]	0.0477023	0	0.655257	FEM
ENSG00000162441.7	-0.191552	[-0.38117579; -0.00192819]	0.0477114	0	0.778042	FEM
ENSG00000203623.4	-0.191956	[-0.38201687; -0.00189432]	0.0477558	0	0.717945	FEM
ENSG00000226103.2	-0.191956	[-0.38201687; -0.00189432]	0.0477558	0	0.717945	FEM
ENSG00000226531.2	-0.191956	[-0.38201687; -0.00189432]	0.0477558	0	0.717945	FEM
ENSG00000134242.11	0.194043	[0.00190038; 0.38618619]	0.0477726	0.437106	0.019643	FEM
ENSG00000173991.5	0.194049	[0.00186789; 0.38623026]	0.0478104	0.479928	0.00907095	FEM
ENSG00000163629.8	0.192783	[0.00185128; 0.38371526]	0.0478155	0.222147	0.180308	FEM
ENSG00000148634.11	0.193021	[0.00184748; 0.38419428]	0.0478226	0.255424	0.144193	FEM
[truncated: 54 more rows]
